# Supplementary material for: A palladium/Et3N·HI-catalyzed highly selective 7-endo alkyl-Heck-type reaction of epoxides and a DFT study on the mechanism
Source: Royal Society of Chemistry journal article supplement (doi:10.1039/d1qo00942g), 2021-01-01

## Supporting Information

### **Palladium/ $\text{Et}_3\text{N}\cdot\text{HI}$ -Catalyzed Highly Selective 7-Endo Alkyl-Heck-Type Reaction of Epoxides and DFT Study on the Mechanism**

Xu Dong,<sup>†a</sup> Li-Ping Xu,<sup>†a</sup> Yi Yang,<sup>a</sup> Yunxia Liu,<sup>a</sup> Xin Li,<sup>a</sup> Qing Liu,<sup>a</sup> Liang Zheng,<sup>b</sup>  
Fagang Wang,<sup>a</sup> Hui Liu<sup>\*a</sup>

<sup>a</sup> School of Chemistry and Chemical Engineering, Shandong University of Technology, 266 West Xincun Road, Zibo 255049, China

<sup>b</sup> Comprehensive Law Enforcement Detachment of Zibo Development and Reform Commission, No.4 West Renmin Road, Zibo 255000, China.

\*E-mail: huiliu1030@163.com

## Table of Contents

|                                                                                            |      |
|--------------------------------------------------------------------------------------------|------|
| 1. General Information .....                                                               | S3   |
| 2. Preparation of Starting Material .....                                                  | S4   |
| 3. General Procedure and Analytical Data for 7-Endo Heck Products.....                     | S29  |
| 4. Table S1 for selected preliminary experimental conditions screening .....               | S42  |
| 5. CAS number of ligands L1-L6.....                                                        | S43  |
| 6. Table S2 for Further Screening toward Palladium Catalysts and Solvents .....            | S44  |
| 7. Table S3 Time Course Experiments of 3i .....                                            | S45  |
| 8. Scheme S1 and Scheme S2 Verification Experiments .....                                  | S46  |
| 9. The Synthetic Procedure and Analytical Data for Deuterium-Substrate .....               | S48  |
| 10. Computational Details and References .....                                             | S50  |
| 11. Distortion Interaction Analysis on the Selectivity Determining Transition States ..... | S52  |
| 12. Energies and Coordinates for All the Calculated Species .....                          | S54  |
| 13. Copies of the NMR Spectra for 7-Endo Heck-Type Products .....                          | S68  |
| 14. Copies of the NMR Spectra for Partial Materials .....                                  | S107 |

## 1. General Information

Organic solvents (Aldrich) were used without further purification. Purifications of reactions products were carried out by flash chromatography using Merck silica gel (40-63  $\mu\text{m}$ ).  $^1\text{H}$  NMR (400 MHz),  $^{13}\text{C}$  NMR (100 MHz) were measured on a Bruker Avance 400 MHz spectrometer. Chemical shifts are reported in parts per million (ppm,  $\delta$ ) downfield from residual solvents peaks and coupling constants are reported as Hertz (Hz). Splitting patterns are designated as singlet (s), doublet (d), triplet (t), .... Splitting patterns that could not be interpreted or easily visualized are designated as multiplet (m). Electrospray mass spectra were obtained using an ESI/TOF Mariner Mass Spectrometer. Unless otherwise noted, all other commercially available reagents and solvents were used without further purification.

## 2. Preparation of Starting Material

### General Procedure I:

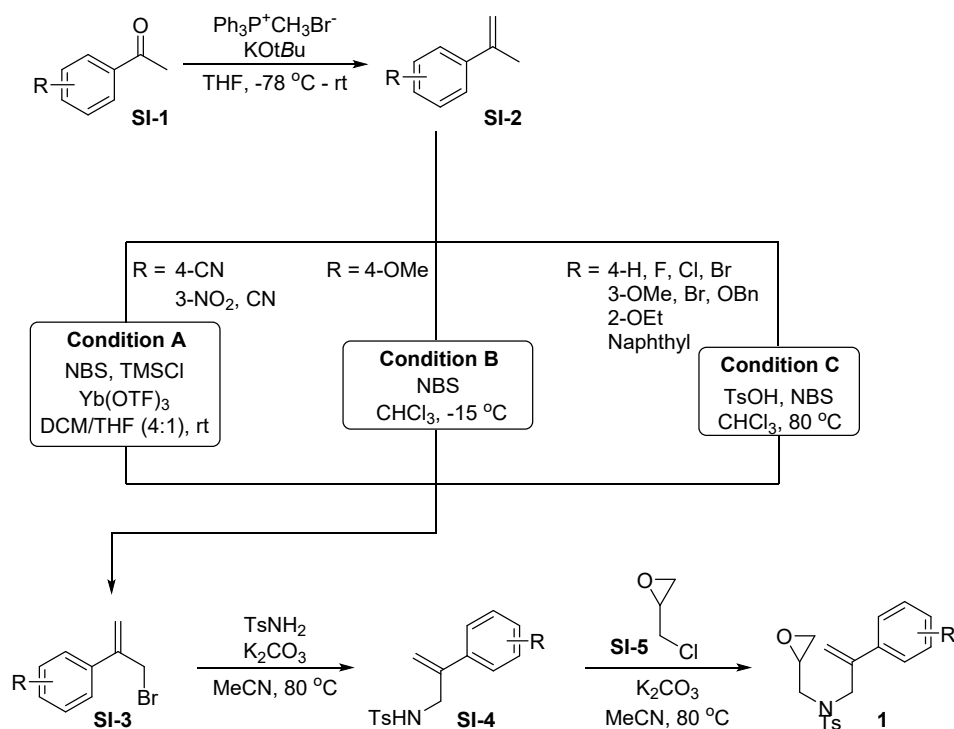

**Scheme S1** General Procedure I: schematic diagram for preparation of epoxides **1a-1n**

**Preparation of styrene **SI-2** (R = 4-Cl):** Potassium *tert*-butoxide (0.93 g, 8.3 mmol) was added to the suspension of methyltriphenylphosphonium bromide (2.96 g, 8.3 mmol) in dry THF (30 mL) at  $-78\text{ }^\circ\text{C}$  condition. After 1 h stirring at  $-78\text{ }^\circ\text{C}$  condition, a solution of 4-chloroacetophenone (1.00 g, 6.4 mmol) in THF (5 ml) was added dropwise. Then the reaction mixture was stirred at room temperature for 1 h. The reaction mixture was diluted with petroleum ether and filtered, filtrate was concentrated. The compound **SI-2** (R = 4-Cl) was obtained as colorless liquid by column chromatographic purification of the crude product using hexanes as eluent. Yield (0.82 g, 85%)

**Preparation of bromide **SI-3** (R = 3-NO<sub>2</sub>), Condition A:** The styrene **SI-2** (R = 3-NO<sub>2</sub>) (1.75 g, 10.7 mmol) was dissolved in a mixture solution of DCM (20 mL) and THF (5 mL) at rt. Then *N*-bromosuccinimide (2.09 g, 11.8 mmol),  $\text{Yb}(\text{OTf})_3$  (Ytterbium(III) trifluoromethanesulfonate hydrate, 0.34 g, 0.54 mmol), and TMSCl (58.7 mg, 0.54 mmol) was added successively. The reaction mixture was stirred at rt for 1 h, and then it was diluted with water (30 mL) and the mixture was extracted with DCM (3×20 mL). The combined organic layers were washed with brine, dried, filtered and evaporated to afford crude product under reduced pressure. Purification on silica gel (hexanes/EtOAc = 15:1) afforded the bromide **SI-3** (R = 3-NO<sub>2</sub>). Yield (1.44 g, 56%)

**Preparation of bromide **SI-3** (R = 4-OMe), Condition B:** The styrene **SI-2** (R = 4-OMe) (2.0 g, 13.5 mmol) was dissolved in 30 mL  $\text{CHCl}_3$  at  $-15\text{ }^\circ\text{C}$ . Then *N*-bromosuccinimide (2.4 g, 13.5 mmol)



was added in batches during 2 min. The mixture was stirred at -15°C for 1.5 h. As reaction completed, the solvent was evaporated quickly *in vacuo*, and the compound **SI-3 (R = 4-OMe)** was obtained as a pale yellow oil by column chromatographic purification (hexanes/EtOAc = 20:1). Yield (0.98 g, 33%)

**Preparation of bromide SI-3 (R = 4-Cl), Condition C:** To a solution of **SI-2 (R = 4-Cl)** (0.82 g, 5.4 mmol) in 6 mL CHCl<sub>3</sub> was added *N*-bromosuccinimide (1.15 g, 6.5 mmol) and *p*-toluenesulfonic acid (0.09 g, 0.5 mmol). The mixture was stirred and heated to 80 °C under reflux for 3 h. After the concentration of the reaction liquid *in vacuo*, petroleum ether was added. The formed precipitate was filtered off and then the filtrate was dried over Na<sub>2</sub>SO<sub>4</sub> and evaporated. The compound **SI-3 (R = 4-Cl)** was obtained as pale yellow liquid by column chromatographic purification of the crude product using hexanes as eluent. Yield (0.97 g, 77%)

**Preparation of amine SI-4 (R = 4-Cl):** The bromide **SI-3 (R = 4-Cl)** (0.97 g, 4.2 mmol) was dissolved in 25 mL acetonitrile, and then *p*-toluenesulfonamide (1.80 g, 10.5 mmol), K<sub>2</sub>CO<sub>3</sub> (1.45 g, 10.5 mmol) was added successively. The resulting mixture was stirred and refluxed at 80 °C for 3.5 h. After successive filtration and purification by column chromatography (hexanes/EtOAc = 5:1), alcohol **SI-4 (R = 4-Cl)** was obtained as a white solid. Yield (0.99 g, 75%)

**Preparation of epoxide 1d (R = 4-Cl):** The amine **SI-4 (R = 4-Cl)** (0.99 g, 3.1 mmol), (±)-epichlorohydrin **SI-5** (0.86 g, 9.3 mmol), and K<sub>2</sub>CO<sub>3</sub> (1.08 g, 7.8 mmol) was added successively to 15 mL acetonitrile. The resulting mixture was stirred and refluxed at 80 °C for 9 h. The precipitate was removed by filtration, and the filtrate was concentrated *in vacuo*. The epoxide **1d** was obtained as a white solid by column chromatographic purification (hexanes/EtOAc = 10:1 to 5:1) of the crude product. Yield (0.96 g, 82%)

## General Procedure II:

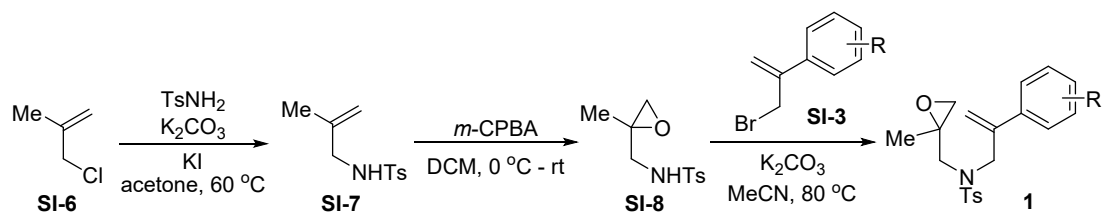

**Scheme S2** General Procedure II: schematic diagram for preparation of epoxides **1o-1t**

**Preparation of alkene SI-7:** Dropwise adding 3-chloro-2-methylpropene **SI-6** (0.91 g, 10 mmol) to the mixture of *p*-toluenesulfonamide (5.14 g, 30 mmol),  $\text{K}_2\text{CO}_3$  (3.46 g, 25 mmol),  $\text{KI}$  (0.83 g, 5 mmol) and acetone (50 mL). The mixture was stirred and reflux at  $60\text{ }^\circ\text{C}$  for 5 h. The precipitate that had formed was filtered off and then organic layer was dried over anhydrous  $\text{Na}_2\text{SO}_4$  and evaporated. The crude product was purified by column chromatography (hexanes/EtOAc = 15:1) to give the **SI-7** as a white solid. Yield (1.53 g, 68%)

**Preparation of epoxide SI-8:** The alkene **SI-7** (1.0 g, 4.4 mmol) was dissolved in  $\text{DCM}$  (30 mL) at  $0\text{ }^\circ\text{C}$  under  $\text{N}_2$ . Then the *m*-CPBA 85% (1.08 g, 5.3 mmol) was added and the resulting mixture was stirred for 2 h at  $0\text{ }^\circ\text{C}$ . The reaction was quenched with saturated aqueous sodium thiosulfate solution (10 mL). It was extracted with  $\text{DCM}$  ( $3 \times 10$  mL) and the combined extract was washed with saturated sodium bicarbonate solution (20 mL) and brine (20 mL) and finally dried over anhydrous sodium sulfate. The solvent was removed under reduced pressure and the residue obtained was purified by column chromatography (hexanes/EtOAc = 5:1) to yield epoxide **SI-8**. Yield (0.92 g, 87%)

**Preparation of bromide SI-3:** See Procedure I, Preparation of bromide **SI-3**.

**Preparation of epoxide 1o:** The epoxide **SI-8** (0.51 g, 2.1 mmol), bromide **SI-3** ( $\text{R} = \text{H}$ ) (0.63 g, 3.2 mmol), and  $\text{K}_2\text{CO}_3$  (0.58 g, 4.2 mmol) was added successively to 10 mL acetonitrile. The resulting mixture was stirred and refluxed at  $80\text{ }^\circ\text{C}$  for 4 h. The precipitate was removed by filtration, and the filtrate was concentrated *in vacuo*. Epoxide **1o** was obtained as a white solid by column chromatographic purification (hexanes/EtOAc = 8:1 to 5:1) of the crude product. Yield (0.62 g, 83%)

### General Procedure III:

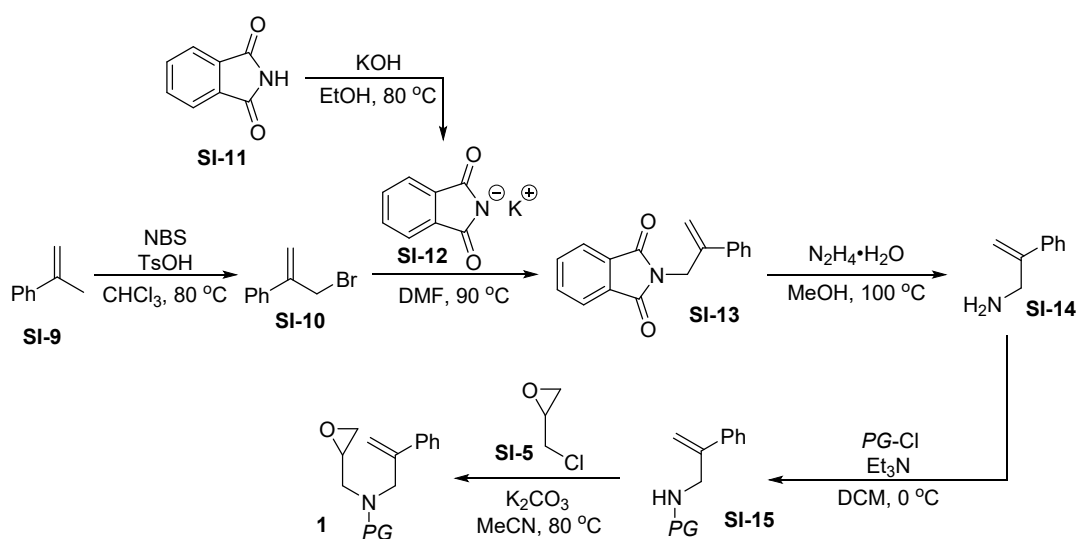

**Scheme S3** General Procedure III: schematic diagram for preparation of epoxides **1u-1w**

**Preparation of bromide SI-10:** See Procedure I, Preparation of bromide **SI-3**, Condition C.

**Preparation of imide SI-12:** To a solution of KOH 84% (9.5 g, 169.7 mmol) in absolute ethanol (100 mL), phthalimide **SI-11** (17.5 g, 119 mmol) was added and the resulting mixture was refluxed at 80°C for 1 h. The reaction mixture was then cooled to ambient temperature and filtered under vacuum. After filtration, washings with absolute EtOH and drying, potassium phthalimide **SI-12** was obtained as a white solid and used in the next step without further purification. Yield (21.2 g, 96%)

**Preparation of imide SI-13:** To a solution of bromide **SI-10** (3.0 g, 15.0 mmol) in 40 mL DMF, potassium phthalimide **SI-12** (2.78 g, 15 mmol) was added and the resulting mixture was stirred at 90°C for 2 h. As reaction completed, the reaction mixture was then cooled to ambient temperature and diluted with EtOAc (100 mL). Washings with water (4×25 mL), brine (30 mL), drying, and concentration *in vacuo* afforded the crude product, which purified by column chromatography (hexanes/EtOAc = 10:1 to 8:1) to give the imide **SI-13** as a white solid. Yield (2.5 g, 63%)

**Preparation of amine SI-14:** Compound **SI-13** (2.5 g, 9.5 mmol) was dissolved in MeOH (35 mL). Hydrazine hydrate 85% (1.4 mL, 23.7 mmol) was added and the reaction mixture was heated to reflux. While a white precipitate was formed (after ± 1 h), 20 mL of water was added and stirring was continued. After 4 hours, the mixture was concentrated *in vacuo* to remove most of the MeOH. The residue was dissolved in 30 mL H<sub>2</sub>O, and transferred to a separation funnel. The water layer was extracted with CH<sub>2</sub>Cl<sub>2</sub> (4×20 mL). The combined organic phases were washed with saturated NaHCO<sub>3</sub> solution (50 mL), brine (50 mL), dried over anhydrous Na<sub>2</sub>SO<sub>4</sub>, and concentrated under slightly reduced pressure at 35°C, yielding amine **SI-14** as a colorless oil. Yield (0.97 g, 77%)

**Preparation of amine SI-15 (PG = Ms):** To a solution of amine **SI-14** (0.97 g, 7.2 mmol) in DCM (10 mL) was added triethylamine (1.0 mL, 7.2 mmol) and methanesulfonyl chloride (0.6 mL, 7.9 mmol) at 0 °C. The reaction mixture was allowed to stir at 0 °C for 1 hour and then gradually warmed up to room temperature over 1 hour. The resulting mixture was diluted with DCM (30 mL) and washed with saturated aqueous sodium bicarbonate solution (25 mL). The aqueous layer was extracted with DCM (3×10 mL) and the combined organic layers were dried over sodium sulfate, filtered and concentrated under reduced pressure. The amine **SI-15 (PG = Ms)** was obtained as a colorless oil and used in the next step without further purification. Yield (0.94 g, 62%)

**Preparation of epoxide 1u (PG = Ms):** The amine **SI-15 (PG = Ms)** (0.5 g, 2.4 mmol), (±)-epichlorohydrin **SI-5** (0.56 mL, 7.2 mmol), and K<sub>2</sub>CO<sub>3</sub> (0.66 g, 4.8 mmol) was added successively to 10 mL acetonitrile. The resulting mixture was stirred and refluxed at 80 °C for 4 h. The precipitate was removed by filtration, and the filtrate was concentrated *in vacuo*. The epoxide **1u** was obtained as a white solid by column chromatographic purification (hexanes/EtOAc = 5:1 to 3:1) of the crude product. Yield (0.57 g, 89%)

### General Procedure IV:

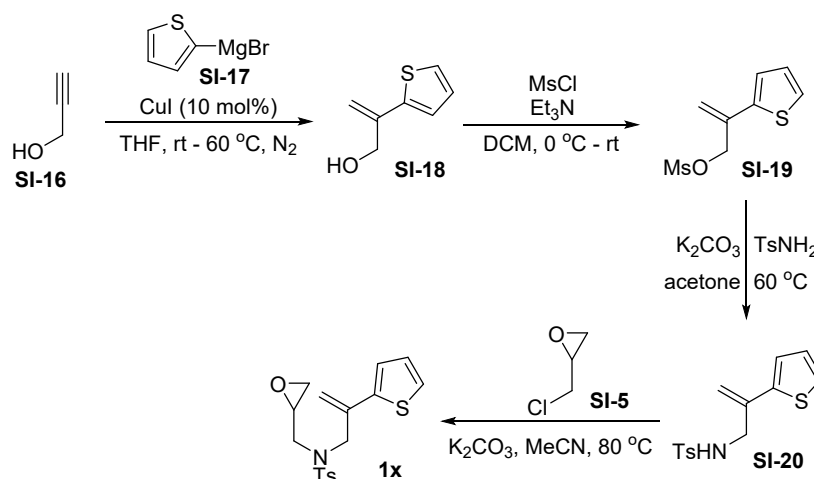

**Scheme S4** General Procedure IV: schematic diagram for preparation of epoxide **1x**

**Preparation of alcohol SI-18:** All of the following operations were carried out under a nitrogen atmosphere. In a 250 mL oven-dried three-necked round bottom flask, Mg (1.08 g, 44.5 mmol) and dry THF (5 mL) was added under nitrogen atmosphere. Then 0.2 mL of 2-bromothiophene was added by a syringe. The mixture was heated at 70°C until the colorless solution turned to light taupe, then the hot plate was removed. A solution of 2-bromothiophene (4.4 mL, 44.5 mmol) in dry THF (60 mL) was added dropwise. The resulting mixture was stirred at room temperature for 2 h, until the Mg was completely consumed, to give the solution of Grignard reagent of 2-bromothiophene **SI-17**. Then CuI (342.8 mg, 1.8 mmol) was added to the Grignard reagent, and the suspension was stirred for 30 min at ambient temperature. A solution of propargyl alcohol **SI-16** (1.1 mL, 17.8 mmol) in dry THF (40 mL) was added dropwise to the mixture by a constant pressure dropping funnel over 20 min. As the dropping was completed, the resulting mixture was heated to 70 °C and refluxed for 5 h. Then the mixture was cooled to ambient temperature and quenched slowly with NH<sub>4</sub>Cl (80 mL, saturated aq.). The reaction mixture was transferred to a separating funnel, and EtOAc (80 mL) was added. The aqueous layer was extracted with EtOAc (3×50 mL). The combined organic layers were washed with brine (60 mL), dried with Na<sub>2</sub>SO<sub>4</sub>, and concentrated *in vacuo*. Purification by column chromatography (hexanes/EtOAc = 5:1) afforded the alcohol **SI-18** as a pale yellow liquid. Yield (0.77 g, 31%)

**Preparation of alkene SI-19:** The alcohol **SI-18** (0.49 g, 3.5 mmol) was dissolved in DCM (15 mL) at 0°C, then the methanesulfonyl chloride (0.33 mL, 4.2 mmol) and triethylamine (0.58 mL, 4.2 mmol) was added dropwise in sequence. The reaction mixture was gradually warmed to room temperature, and stirred for 2 hours. The reaction mixture was quenched with NaHCO<sub>3</sub> (saturated aq.), the organic phase was isolated, dried with Na<sub>2</sub>SO<sub>4</sub>, filtered, evaporated, purified by column chromatography (hexanes/EtOAc = 6:1) to afford alkene **SI-19** as a yellow oil. Yield (0.60 g, 79%) (Note: this compound should be used as soon as possible for it is easy to deteriorate)

**Preparation of amine SI-20:** The alkene **SI-19** (379.0 mg, 1.7 mmol) was dissolved in acetone (15 mL), and then *p*-toluenesulfonamide (582.1 mg, 3.4 mmol), K<sub>2</sub>CO<sub>3</sub> (469.9 mg, 3.4 mmol) was added successively. The resulting mixture was stirred and refluxed at 60 °C for 4 h. After successive filtration, concentration, and purification by column chromatography (hexanes/EtOAc = 6:1), amine **SI-20** was obtained as a white solid. Yield (328.2 mg, 66%). **<sup>1</sup>H NMR (400 MHz, CDCl<sub>3</sub>, δ ppm):** 7.75 (d, *J* = 8.0 Hz, 2H), 7.31 (d, *J* = 8.0 Hz, 2H), 7.18 (d, *J* = 5.2 Hz, 1H), 6.97-6.94 (m, 2H), 5.42 (s, 1H), 5.09 (s, 1H), 4.65 (t, *J* = 6.0 Hz, 1H), 3.96 (d, *J* = 6.4 Hz, 2H), 2.44 (s, 3H).

**Preparation of epoxide 1x: SI-20** (328.2 mg, 1.1 mmol). (See Procedure I, Preparation of epoxide **1d**.) Yield of **1x** (268.2 mg, 70%)

## General Procedure V:

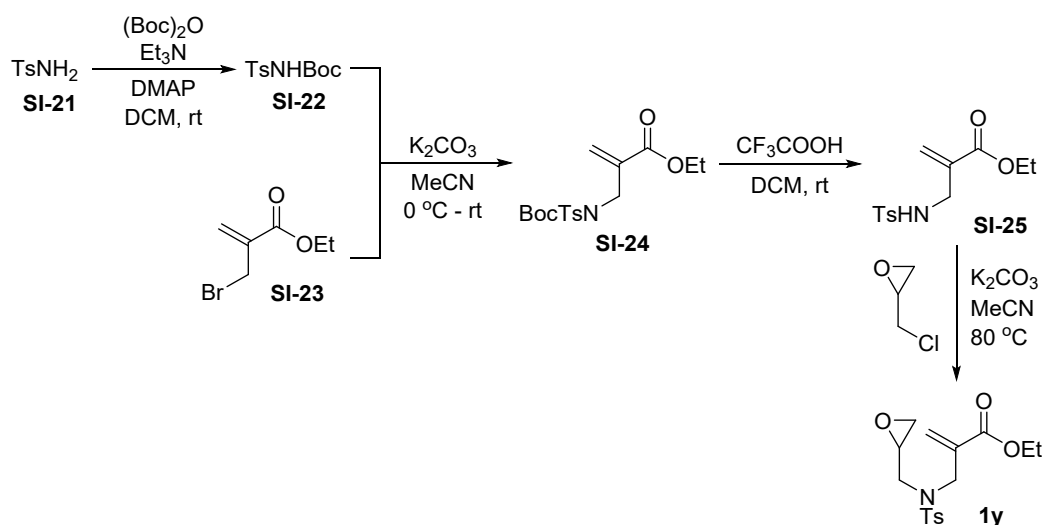

**Scheme S5** General Procedure V: schematic diagram for preparation of epoxides **1y**

**Preparation of amine SI-22:** *p*-Toluenesulfonamide **SI-21** (17.1 g, 100 mmol) was dissolved in 100 mL  $\text{CH}_2\text{Cl}_2$ , and  $\text{Et}_3\text{N}$  (12.1 g, 120 mmol) and 4-dimethylaminopyridine (1.2 g, 10 mmol) were added under stirring successively. The mixture was stirred for 5 min, and then a solution of  $(\text{Boc})_2\text{O}$  (24.0 g, 110 mmol) in 20 mL  $\text{CH}_2\text{Cl}_2$  was added dropwise via a constant pressure funnel. The resulting mixture was further stirred for 5 h at room temperature. The reaction mixture was quenched with  $\text{NH}_4\text{Cl}$  (50 mL saturated aq.) and 50 mL 1N hydrochloric acid, the organic phase was isolated, dried with  $\text{Na}_2\text{SO}_4$ , filtered, and evaporated. Purification by recrystallization ( $\text{EtOAc}$  and hexanes) afforded **SI-22** as a white acicular crystal. Yield (20.5 g, 77%)

**Preparation of compound SI-24:** Amine **SI-22** (1.69 g, 6.2 mmol) and  $\text{K}_2\text{CO}_3$  (1.44 g, 10.4 mmol) were added into  $\text{CH}_3\text{CN}$  (20 mL), and the mixture was stirred for five minutes. Then the mixture was cooled to  $0\text{ }^\circ\text{C}$ , and bromide **SI-23** (0.71 mL, 5.2 mmol) was added. Until the reaction was completed, the crude product was purified by flash chromatography on silica gel (hexanes/ $\text{EtOAc}$  = 7:1) to give the desired product **SI-24** as a colorless oil. Yield (1.74 g, 92%)

**Preparation of compound SI-25:** A solution of compound **SI-24** (1.74 g, 4.5 mmol) in 15 mL  $\text{CH}_2\text{Cl}_2$  was added  $\text{CF}_3\text{COOH}$  (1.68 mL, 22.7 mmol) at room temperature. The mixture was stirred for 3 h until the reaction was completed. After 10 mL water was added into the mixture, the  $\text{K}_2\text{CO}_3$  was added slowly until no more bubbles released. The aqueous layer was extracted with  $\text{CH}_2\text{Cl}_2$  ( $3 \times 10$  mL). The combined organic layers were washed with brine (20 mL), dried with  $\text{Na}_2\text{SO}_4$ , and concentrated *in vacuo*. Purification by column chromatography (hexanes/ $\text{EtOAc}$  = 4:1) afforded the alcohol **SI-25** as a pale yellow oil. Yield (0.93 g, 72%)

**Preparation of epoxide 1y:** **SI-25** (283.5 mg, 1.0 mmol). (See Procedure I, Preparation of epoxide **1d**.) Yield of **1y** (231.3 mg, 68%)

## General Procedure VI:

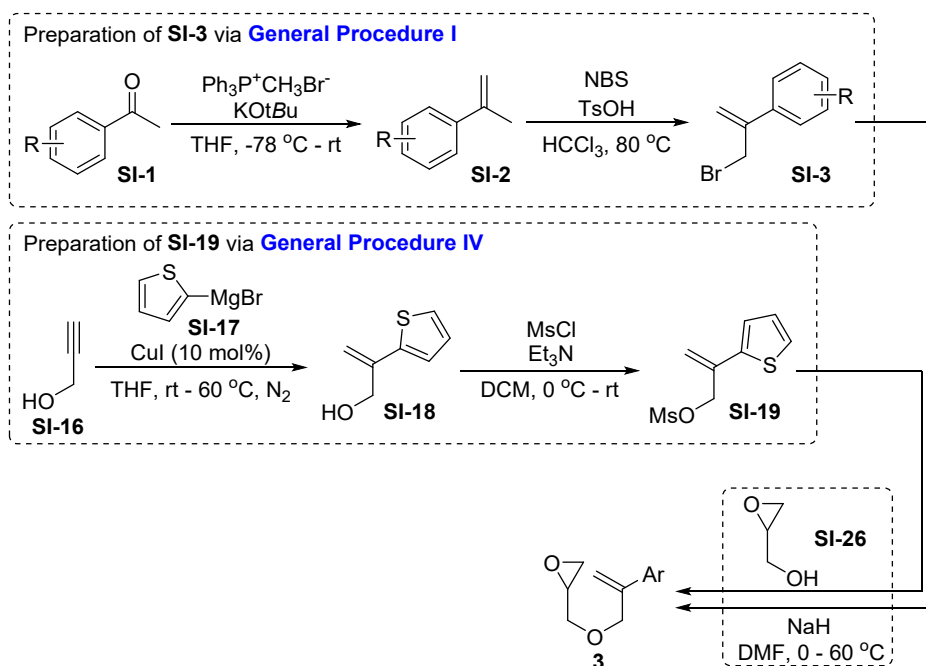

**Scheme S5** General Procedure VI: schematic diagram for preparation of epoxides **3a-3i**

**Preparation of epoxide 3d (Ar = 4-F-C<sub>6</sub>H<sub>4</sub>):** Under nitrogen atmosphere, to a suspension of NaH 60% (192.0 mg, 4.8 mmol) in dry *N,N*-dimethylformamide (10 mL) at 0 °C, the glycidol **SI-26** (0.26 mL, 4.0 mmol) was added and massive bubbles were released. The reaction mixture was kept stirring at 0°C for another 20 min after the bubble stopped forming. Then compound **SI-3 (R = 4-F)** (1.03 g, 4.8 mmol) was added, and the resulting mixture was warm to room temperature and stirred for 1 h. As reaction completed, the reaction mixture was diluted with EtOAc (50 mL). Washings with water (4×10 mL), brine (10 mL), drying, and concentration *in vacuo* afforded the crude product, which purified by column chromatography (hexanes/EtOAc = 15:1 to 10:1) to give the epoxide **3d** as a colorless oil. Yield (557.6 mg, 67%)



## General Procedure VII:

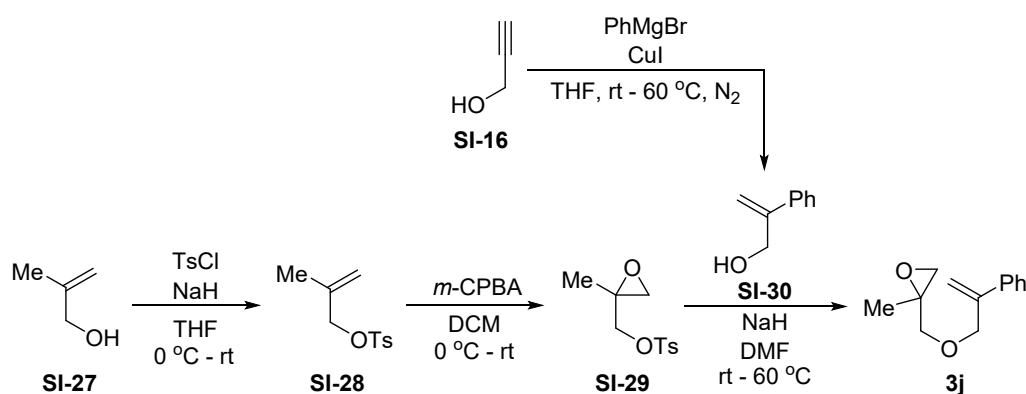

**Scheme S6** General Procedure VII: schematic diagram for preparation of epoxides **3j**

**Preparation of alkene SI-28:** To a solution Under nitrogen atmosphere, to a suspension of  $\text{NaH}$  60% (0.717 g, 18 mmol) in dry THF (20 mL) at  $0^\circ\text{C}$ , the methallyl alcohol **SI-27** (1.2 mL, 14 mmol) was added slowly and massive bubbles were released. The reaction mixture was keep stirring at  $0^\circ\text{C}$  for another 20 min after the bubble stopped forming. The  $\text{TsCl}$  (2.67 g, 14 mmol) was dissolved in 10 mL THF and added dropwise, the resulting mixture was gradually warmed to rt and stirred for 2 h. As reaction completed, the reaction mixture was quenched with 40 mL water and extracted with EtOAc ( $3 \times 30$  mL). The combined organic layer was washed with brine (40 mL), drying, and concentrated *in vacuo* afforded the crude product, which was used without further purification. Yield (2.57 g, 82%)

**Preparation of epoxide SI-29:** The alkene **SI-28** (1.22 g, 5.4 mmol) was dissolved in DCM (30 mL) at  $0^\circ\text{C}$  under  $\text{N}_2$ . Then the  $m\text{-CPBA}$  85% (1.16 g, 6.75 mmol) was added and the resulting mixture was warmed to room temperature and stirred for 3 h. The reaction was quenched with saturated aqueous sodium thiosulfate solution (10 mL). Then the mixture was extracted with DCM ( $3 \times 10$  mL) and the combined extract was washed with saturated sodium bicarbonate solution (20 mL) and brine (20 mL) and finally dried over anhydrous sodium sulfate. The solvent was removed under reduced pressure and the residue obtained was purified by column chromatography (hexanes/EtOAc = 10:1 to 5:1) to yield epoxide **SI-29**. Yield (0.98 g, 75%)

**Preparation of alcohol SI-30:** To a solution of propargyl alcohol **SI-16** (1.0 g, 18 mmol) in dry THF (40 mL) was vacuum purged three times, backfilling with  $\text{N}_2$ .  $\text{CuI}$  (0.343g, 1.8 mmol) was added under stirring and  $\text{N}_2$  atmosphere. The suspension was cooled to  $-78^\circ\text{C}$ . Then a solution of  $\text{PhMgBr}$  (8.2 g, 45 mmol) in 60 mL THF was added dropwise by constant pressure funnel under vigorous stirring. The resulting mixture held at  $-78^\circ\text{C}$  for 1 h. Then it was warmed to room temperature and stirred for 18 h. The mixture was cooled to  $-78^\circ\text{C}$  again and quenched slowly with  $\text{H}_2\text{O}$  (10 mL). After the suspension was warmed to room temperature, dilute  $\text{HCl}$  solution (1 N, 150 mL) was added and the aqueous layer was extracted with EtOAc ( $3 \times 50$  mL). The combined organic layers were washed brine (40 mL), dried with  $\text{Na}_2\text{SO}_4$ , and concentrated *in vacuo*. Purification by column chromatography (hexanes/EtOAc = 10:1 to 5:1) afforded the **SI-30**

as a light yellow liquid. Yield (2.33 g, 96%).

**Preparation of epoxide 3j:** Under nitrogen atmosphere, to a suspension of NaH 60% (57.6.0 mg, 2.4 mmol) in dry DMF (8 mL) at 0°C, the alcohol **SI-30** (268.4 mg, 2.0 mmol) was added and massive bubbles were released. The reaction mixture was keep stirring at 0°C for another 20 min after the bubble stopped forming. Then compound **SI-29** (581.5 mg, 2.4 mmol) was added, the resulting mixture was gradually heated to 60°C and refluxed for 3 h. As reaction completed, the reaction mixture was diluted with EtOAc (40 mL). Washings with water (4×10 mL), brine (10 mL), drying, and concentration *in vacuo* afforded the crude product, which purified by column chromatography (hexanes/EtOAc = 20:1 to 10:1) to give the epoxide **3j** as a colorless oil. Yield (273.7 mg, 67%)

### General Procedure VIII:

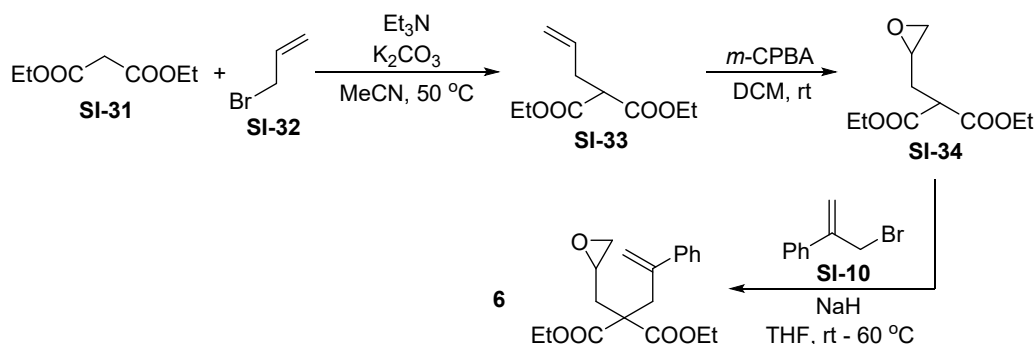

**Scheme S7** General Procedure VIII: schematic diagram for preparation of epoxides **6**

**Preparation of olefin SI-33:** The diethyl malonate **SI-31** (7.6 mL, 50 mmol), allyl bromide **SI-32** (8.6 mL, 100 mmol), Et<sub>3</sub>N (6.9 mL, 50 mmol), and K<sub>2</sub>CO<sub>3</sub> (17.3 g, 125 mmol) was added successively to 70 mL acetonitrile. The resulting mixture was stirred and refluxed at 50 °C overnight. The precipitate was removed by filtration, and the filtrate was concentrated *in vacuo*. The olefin **SI-33** was obtained as a colorless oil by column chromatographic purification (hexanes/EtOAc = 20:1 to 10:1) of the crude product. Yield (7.3 g, 73%)

**Preparation of epoxide SI-34:** The compound **SI-33** (3.1 g, 14.9 mmol) was dissolved in DCM (35 mL) at 0°C under N<sub>2</sub>. Then the *m*-CPBA 85% (3.2 g, 18.6 mmol) was added and the resulting mixture was stirred for 2 h at 0°C. The reaction was quenched with saturated aqueous sodium thiosulfate solution (10 mL). It was extracted with DCM (3×10 mL) and the combined extract was washed with saturated sodium bicarbonate solution (20 mL) and brine (20 mL) and finally dried over anhydrous sodium sulfate. The solvent was removed under reduced pressure and the residue obtained was purified by column chromatography (hexanes/EtOAc = 5:1) to yield **SI-34** as a colorless oil. Yield (2.35 g, 70%)

**Preparation of epoxide 6:** Under nitrogen atmosphere, to a suspension of NaH 60% (276.0 mg, 6.9 mmol) in dry THF (25 mL) at 0°C, the compound **SI-34** (1.5 g, 6.9 mmol) was added and massive bubbles were released. The reaction mixture was keep stirring at 0°C for another 20 min after the bubble stopped forming. Then bromine **SI-10** (2.0 g, 10.4 mmol) was added, the resulting mixture was gradually heated to 60°C and refluxed for 2 h. As reaction completed, the reaction mixture was diluted with EtOAc (50 mL). Washings with water (2×15 mL), brine (10 mL), drying, concentration *in vacuo*, and purification by column chromatography (hexanes/EtOAc = 10:1) gave the epoxide **6** as a colorless oil. Yield (1.71 g, 75%)

### Analytical Data of Substrates:

#### 4-methyl-*N*-(oxiran-2-ylmethyl)-*N*-(2-phenylallyl)benzenesulfonamide

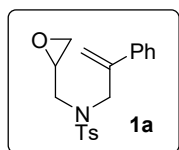

C<sub>19</sub>H<sub>21</sub>NO<sub>3</sub>S

MW: 343.44 g·mol<sup>-1</sup>

The title compound was prepared according to **General Procedure I**.

Colorless Oil

Yield: 82%

**<sup>1</sup>H NMR (400 MHz, CDCl<sub>3</sub>, δ ppm):** 7.67 (d, *J* = 8.0 Hz, 2H), 7.43 (dd, *J* = 8.0, 2.0 Hz, 2H), 7.35-7.28 (m, 5H), 5.49 (s, 1H), 5.28 (s, 1H), 4.35-4.27 (m, 2H), 3.30 (dd, *J* = 15.2, 4.8 Hz, 1H), 3.09 (dd, *J* = 15.2, 5.6 Hz, 1H), 2.93-2.89 (m, 1H), 2.63 (t, *J* = 4.4 Hz, 1H), 2.43 (s, 3H), 2.40 (dd, 4.8, 2.4 Hz, 1H).

**<sup>13</sup>C NMR (100 MHz, CDCl<sub>3</sub>, δ ppm):** 143.5, 142.6, 138.1, 136.0, 129.7, 128.4, 128.0, 127.3, 126.4, 116.5, 52.4, 50.0, 49.6, 45.9, 21.5.

**MS (EI)** *m/z* 343 (M<sup>+</sup>)

#### *N*-(2-(4-methoxyphenyl)allyl)-4-methyl-*N*-(oxiran-2-ylmethyl)benzenesulfonamide

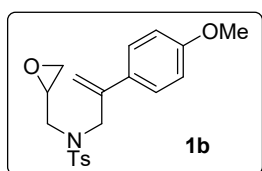

C<sub>20</sub>H<sub>23</sub>NO<sub>4</sub>S

MW: 373.47 g·mol<sup>-1</sup>

The title compound was prepared according to **General Procedure I**.

Colorless Oil

Yield: 74%

**<sup>1</sup>H NMR (400 MHz, CDCl<sub>3</sub>, δ ppm):** 7.69 (d, *J* = 8.0 Hz, 2H), 7.40 (d, *J* = 8.4 Hz, 2H), 7.30 (d, *J* = 8.0 Hz, 2H), 6.86 (d, *J* = 8.8 Hz, 2H), 5.42 (s, 1H), 5.17 (s, 1H), 4.26 (s, 2H), 3.82 (s, 3H), 3.23 (dd, *J* = 15.2, 4.8 Hz, 1H), 3.11 (dd, *J* = 15.2, 5.2 Hz, 1H), 2.94-2.84 (m, 1H), 2.62 (t, *J* = 4.4 Hz, 1H), 2.44 (s, 3H), 2.41-2.38 (m, 1H).

**<sup>13</sup>C NMR (100 MHz, CDCl<sub>3</sub>, δ ppm):** 159.5, 143.6, 141.9, 136.0, 130.4, 129.7, 127.7, 127.3, 115.1, 113.8, 55.3, 52.8, 50.0, 49.5, 46.2, 21.5.

**MS (EI)** *m/z* 373 (M<sup>+</sup>)

#### *N*-(2-(4-fluorophenyl)allyl)-4-methyl-*N*-(oxiran-2-ylmethyl)benzenesulfonamide

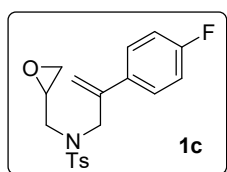

C<sub>19</sub>H<sub>20</sub>FNO<sub>3</sub>S

MW: 361.43 g·mol<sup>-1</sup>

The title compound was prepared according to **General Procedure I**.

Colorless Oil

Yield: 81%

**<sup>1</sup>H NMR (400 MHz, CDCl<sub>3</sub>, δ ppm):** 7.67 (d, *J* = 7.6 Hz, 2H), 7.44-7.40 (m, 2H), 7.30 (d, *J* = 7.6 Hz, 2H), 7.01 (t, *J* = 8.4 Hz, 2H), 5.44 (s, 1H), 5.26 (s, 1H), 4.27 (s, 2H), 3.33 (dd, *J* = 15.2, 4.8 Hz, 1H), 3.03 (dd, *J* = 15.2, 5.6 Hz, 1H), 2.91-2.86 (m, 1H), 2.64 (t, *J* = 4.4 Hz, 1H), 2.44 (s, 3H), 2.42-2.38 (m, 1H).

**<sup>13</sup>C NMR (100 MHz, CDCl<sub>3</sub>, δ ppm):** 162.6 (d, *J* = 245.8 Hz), 143.7, 141.7, 135.9, 134.1 (d, *J* = 3.3 Hz), 129.8, 128.2 (d, *J* = 8.0 Hz), 127.3, 116.6, 115.3 (d, *J* = 21.3 Hz), 52.6, 50.0, 49.6, 45.8, 21.5.

**<sup>19</sup>F NMR (376 MHz, CDCl<sub>3</sub>, δ ppm):** -113.9.

**MS (EI)** *m/z* 361 (M<sup>+</sup>)

***N*-(2-(4-chlorophenyl)allyl)-4-methyl-*N*-(oxiran-2-ylmethyl)benzenesulfonamide**

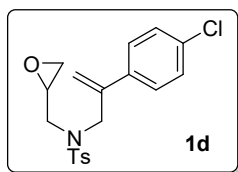

$C_{19}H_{20}ClNO_3S$

**MW:** 377.88 g·mol<sup>-1</sup>

The title compound was prepared according to **General Procedure I**.

Colorless Oil

**Yield:** 82%

**<sup>1</sup>H NMR (400 MHz, CDCl<sub>3</sub>, δ ppm):** 7.57 (d, *J* = 8.4 Hz, 2H), 7.28 (d, *J* = 8.4 Hz, 2H), 7.21-7.16 (m, 4H), 5.38 (s, 1H), 5.21 (s, 1H), 4.18 (s, 2H), 3.25 (dd, *J* = 15.2, 4.4 Hz, 1H), 2.93 (dd, *J* = 15.2, 5.6 Hz, 1H), 2.80-2.76 (m, 1H), 2.53 (t, *J* = 4.4 Hz, 1H), 2.33 (s, 3H), 2.30 (dd, *J* = 4.8, 2.8 Hz, 1H).

**<sup>13</sup>C NMR (100 MHz, CDCl<sub>3</sub>, δ ppm):** 143.6, 141.5, 136.4, 135.8, 133.7, 129.7, 128.4, 127.7, 127.1, 117.1, 52.4, 49.9, 49.5, 45.6, 21.4.

**MS (EI)** *m/z* 377 (M<sup>+</sup>)

***N*-(2-(4-bromophenyl)allyl)-4-methyl-*N*-(oxiran-2-ylmethyl)benzenesulfonamide**

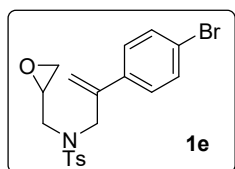

$C_{19}H_{20}BrNO_3S$

**MW:** 422.34 g·mol<sup>-1</sup>

The title compound was prepared according to **General Procedure I**.

White Solid

**Yield:** 60%

**<sup>1</sup>H NMR (400 MHz, CDCl<sub>3</sub>, δ ppm):** 7.66 (d, *J* = 8.0 Hz, 2H), 7.43 (d, *J* = 8.0 Hz, 2H), 7.30 (d, *J* = 8.4 Hz, 4H), 5.48 (s, 1H), 5.30 (s, 1H), 4.27 (s, 2H), 3.35 (dd, *J* = 15.2, 4.0 Hz, 1H), 3.01 (dd, *J* = 15.2, 5.6 Hz, 1H), 2.92-2.86 (m, 1H), 2.64 (t, *J* = 4.4 Hz, 1H), 2.44 (s, 3H), 2.42-2.38 (m, 1H).

**<sup>13</sup>C NMR (100 MHz, CDCl<sub>3</sub>, δ ppm):** 143.7, 141.7, 137.0, 136.0, 131.5, 129.8, 128.1, 127.2, 122.1, 117.3, 52.4, 50.0, 49.6, 45.7, 21.5.

**MS (EI)** *m/z* 421,423 (M<sup>+</sup>)

***N*-(2-(4-cyanophenyl)allyl)-4-methyl-*N*-(oxiran-2-ylmethyl)benzenesulfonamide**

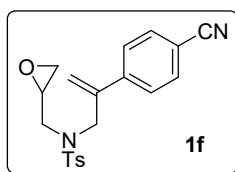

$C_{20}H_{20}N_2O_3S$

**MW:** 368.45 g·mol<sup>-1</sup>

The title compound was prepared according to **General Procedure I**.

Colorless Oil

**Yield:** 65%

**<sup>1</sup>H NMR (400 MHz, CDCl<sub>3</sub>, δ ppm):** 7.67 (d, *J* = 7.6 Hz, 2H), 7.62 (d, *J* = 8.0 Hz, 2H), 7.57 (d, *J* = 8.0 Hz, 2H), 7.32 (d, *J* = 8.0 Hz, 2H), 5.60 (s, 1H), 5.45 (s, 1H), 4.31 (s, 2H), 3.47 (dd, *J* = 14.8, 2.8 Hz, 1H), 2.94-2.83 (m, 2H), 2.64 (t, *J* = 4.4 Hz, 1H), 2.45 (s, 3H), 2.41-2.37 (m, 1H).

**<sup>13</sup>C NMR (100 MHz, CDCl<sub>3</sub>, δ ppm):** 143.9, 142.7, 141.5, 135.8, 132.2, 129.8, 127.2, 119.4, 118.7, 111.5, 52.2, 50.0, 49.8, 45.4, 21.5.

**MS (EI)** *m/z* 368 (M<sup>+</sup>)

### *N*-(2-(3-methoxyphenyl)allyl)-4-methyl-*N*-(oxiran-2-ylmethyl)benzenesulfonamide

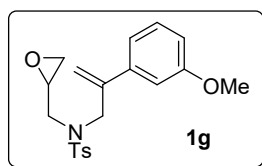

C<sub>20</sub>H<sub>23</sub>NO<sub>4</sub>S

MW: 373.47 g·mol<sup>-1</sup>

The title compound was prepared according to **General Procedure I**.

Colorless Oil

**Yield:** 81%

**<sup>1</sup>H NMR (400 MHz, CDCl<sub>3</sub>, δ ppm):** 7.58 (d, *J* = 8.0 Hz, 2H), 7.19 (d, *J* = 8.0 Hz, 2H), 7.16-7.12 (m, 1H), 6.94-6.93 (m, 2H), 6.75 (dd, *J* = 8.4, 2.0 Hz, 1H), 5.41 (s, 1H), 5.19 (s, 1H), 4.23 (d, *J* = 15.2 Hz, 1H), 4.18 (d, *J* = 15.2 Hz, 1H), 3.72 (s, 3H), 3.20 (dd, *J* = 15.2, 4.8 Hz, 1H), 3.00 (dd, *J* = 15.2, 6.0 Hz, 1H), 2.84-2.78 (m, 1H), 2.53 (t, *J* = 4.4 Hz, 1H), 2.32-2.30 (m, 4H).

**<sup>13</sup>C NMR (100 MHz, CDCl<sub>3</sub>, δ ppm):** 159.6, 143.7, 142.6, 139.6, 136.1, 129.8, 129.4, 127.3, 118.9, 116.8, 113.9, 112.0, 55.3, 52.6, 50.0, 49.7, 46.0, 21.6.

**MS (EI)** *m/z* 373 (M<sup>+</sup>)

**HPLC analysis** CHIRALCEL AD-H column, 1.0 mL/min (5% *i*-PrOH in hexane), 254 nm UV detector, *t*<sub>S</sub> = 33.9 min (peak area = 49.11%), *t*<sub>R</sub> = 34.9 min (peak area = 50.89%).

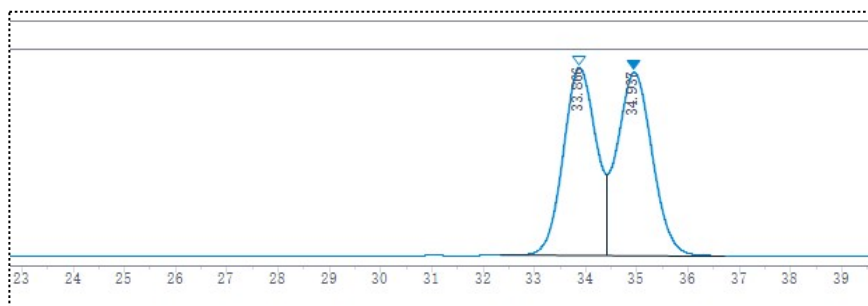

| Peak# | RT (min) | Area (mAU·s) | Area (%) | Starting (min) | Ending (min) |
|-------|----------|--------------|----------|----------------|--------------|
| 1     | 33.866   | 6126.979     | 49.11    | 32.331         | 34.404       |
| 2     | 34.937   | 6349.240     | 50.89    | 34.404         | 36.714       |

### *(R)*-*N*-(2-(3-methoxyphenyl)allyl)-4-methyl-*N*-(oxiran-2-ylmethyl)benzenesulfonamide

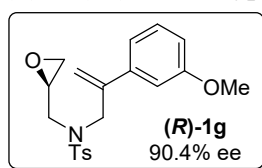

C<sub>20</sub>H<sub>23</sub>NO<sub>4</sub>S

MW: 373.47 g·mol<sup>-1</sup>

The title compound was prepared according to **General Procedure I** (epichlorohydrin was instead by **(*S*)-(+)-epichlorohydrin**).

Colorless Oil

**Yield:** 73%

**<sup>1</sup>H NMR (400 MHz, CDCl<sub>3</sub>, δ ppm):** 7.67 (d, *J* = 7.6 Hz, 2H), 7.29 (d, *J* = 7.6 Hz, 2H), 7.25-7.21 (m, 1H), 7.03-7.01 (m, 2H), 6.85 (d, *J* = 8.4 Hz, 1H), 5.50 (s, 1H), 5.28 (s, 1H), 4.34-4.25 (m, 2H), 3.83 (s, 3H), 3.30 (dd, *J* = 15.2, 4.4 Hz, 1H), 3.09 (dd, *J* = 15.6, 5.6 Hz, 1H), 2.95-2.88 (m, 1H), 2.67-2.62 (m, 1H), 2.43 (s, 3H), 2.42-2.39 (m, 1H).

**<sup>13</sup>C NMR (100 MHz, CDCl<sub>3</sub>, δ ppm):** 159.6, 143.6, 142.6, 139.6, 136.1, 129.7, 129.4, 127.3, 118.9, 116.7, 113.9, 112.0, 55.3, 52.6, 50.0, 49.7, 46.0, 21.5.

**MS (EI)** *m/z* 373 (M<sup>+</sup>)

**HPLC analysis** CHIRALCEL AD-H column, 1.0 mL/min (5% *i*-PrOH in hexane), 254 nm UV detector, *t*<sub>S</sub> = 33.2 min (peak area = 4.81%), *t*<sub>R</sub> = 34.0 min (peak area = 95.19%).

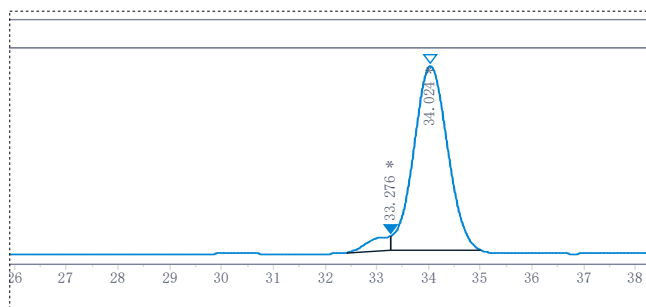

| Peak# | RT (min) | Area (mAU·s) | Area (%) | Starting (min) | Ending (min) |
|-------|----------|--------------|----------|----------------|--------------|
| 1     | 33.276   | 513.741      | 4.81     | 32.416         | 33.276       |
| 2     | 34.024   | 10165.683    | 95.19    | 33.276         | 34.992       |

***N*-(2-(3-(benzyloxy)phenyl)allyl)-4-methyl-*N*-(oxiran-2-ylmethyl)benzenesulfonamide**

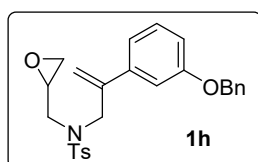

$C_{26}H_{27}NO_4S$

**MW:** 449.57 g·mol<sup>-1</sup>

The title compound was prepared according to **General Procedure I**.

Colorless Oil

**Yield:** 69%

**<sup>1</sup>H NMR (400 MHz, CDCl<sub>3</sub>, δ ppm):** 7.67 (d, *J* = 7.6 Hz, 2H), 7.44 (d, *J* = 7.6 Hz, 2H), 7.38 (t, *J* = 7.2 Hz, 2H), 7.33-7.21 (m, 4H), 7.09 (s, 1H), 7.03 (d, *J* = 7.6 Hz, 1H), 6.92 (d, *J* = 8.0 Hz, 1H), 5.48 (s, 1H), 5.27 (s, 1H), 5.08 (s, 2H), 4.33-4.24 (m, 2H), 3.29 (dd, *J* = 15.2, 4.8 Hz, 1H), 3.08 (dd, *J* = 14.8, 5.6 Hz, 1H), 2.93-2.87 (m, 1H), 2.61 (t, *J* = 4.0 Hz, 1H), 2.40-2.37 (m, 4H).

**<sup>13</sup>C NMR (100 MHz, CDCl<sub>3</sub>, δ ppm):** 158.7, 143.5, 142.4, 139.6, 136.9, 136.0, 129.7, 129.4, 128.5, 127.9, 127.5, 127.2, 119.1, 116.6, 114.6, 112.9, 69.9, 52.5, 49.9, 49.6, 45.9, 21.5.

**MS (EI)** *m/z* 449 (M<sup>+</sup>)

***N*-(2-(3-bromophenyl)allyl)-4-methyl-*N*-(oxiran-2-ylmethyl)benzenesulfonamide**

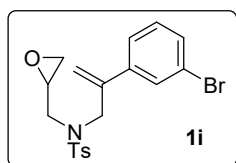

$C_{19}H_{20}BrNO_3S$

**MW:** 422.34 g·mol<sup>-1</sup>

The title compound was prepared according to **General Procedure I**.

White Solid

**Yield:** 73%

**<sup>1</sup>H NMR (400 MHz, CDCl<sub>3</sub>, δ ppm):** 7.66 (d, *J* = 8.0 Hz, 2H), 7.51 (s, 1H), 7.42 (d, *J* = 8.0 Hz, 1H), 7.37 (d, *J* = 8.0 Hz, 1H), 7.29 (d, *J* = 8.0 Hz, 2H), 7.19 (t, *J* = 7.6 Hz, 1H), 5.48 (s, 1H), 5.34 (s, 1H), 4.33-4.24 (m, 2H), 3.42 (dd, *J* = 15.2, 4.0 Hz, 1H), 3.01 (dd, *J* = 15.2, 6.0 Hz, 1H), 2.96-2.90 (m, 1H), 2.67 (t, *J* = 4.4 Hz, 1H), 2.43-2.39 (m, 4H).

**<sup>13</sup>C NMR (100 MHz, CDCl<sub>3</sub>, δ ppm):** 143.7, 141.6, 140.5, 136.1, 131.0, 129.9, 129.8, 129.5, 127.2, 125.2, 122.5, 117.7, 52.2, 50.1, 49.7, 45.6, 21.5.

**MS (EI)** *m/z* 421, 423 (M<sup>+</sup>)

#### 4-methyl-*N*-(2-(3-nitrophenyl)allyl)-*N*-(oxiran-2-ylmethyl)benzenesulfonamide

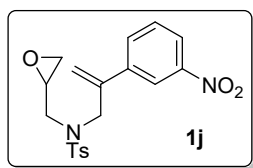

C<sub>19</sub>H<sub>20</sub>N<sub>2</sub>O<sub>5</sub>S

MW: 388.44 g·mol<sup>-1</sup>

The title compound was prepared according to **General Procedure I**.

Light Yellow Solid

**Yield:** 69%

**<sup>1</sup>H NMR (400 MHz, CDCl<sub>3</sub>, δ ppm):** 8.25 (s, 1H), 8.15 (d, *J* = 8.0 Hz, 1H), 7.82 (d, *J* = 8.0 Hz, 1H), 7.68 (d, *J* = 7.6 Hz, 2H), 7.52 (t, *J* = 8.0 Hz, 1H), 7.30 (d, *J* = 7.6 Hz, 2H), 5.61 (s, 1H), 5.48 (s, 1H), 4.35 (s, 2H), 3.55 (d, *J* = 13.2 Hz, 1H), 2.96-2.87 (m, 2H), 2.67 (t, *J* = 3.6 Hz, 1H), 2.43-2.40 (m, 4H).

**<sup>13</sup>C NMR (100 MHz, CDCl<sub>3</sub>, δ ppm):** 148.2, 143.9, 141.0, 140.0, 135.9, 132.6, 129.8, 129.4, 127.2, 122.7, 121.4, 119.1, 52.2, 50.0, 49.9, 45.2, 21.5.

**MS (EI)** *m/z* 388 (M<sup>+</sup>)

#### *N*-(2-(3-cyanophenyl)allyl)-4-methyl-*N*-(oxiran-2-ylmethyl)benzenesulfonamide

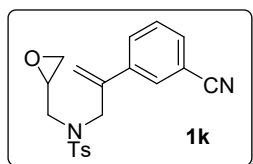

C<sub>20</sub>H<sub>20</sub>N<sub>2</sub>O<sub>3</sub>S

MW: 368.45 g·mol<sup>-1</sup>

The title compound was prepared according to **General Procedure I**.

Pale Yellow Oil

**Yield:** 71%

**<sup>1</sup>H NMR (400 MHz, CDCl<sub>3</sub>, δ ppm):** 7.72-7.64 (m, 4H), 7.58 (d, *J* = 7.6 Hz, 1H), 7.47-7.43 (m, 1H), 7.32 (d, *J* = 7.6 Hz, 2H), 5.53 (s, 1H), 5.43 (s, 1H), 4.30 (s, 2H), 3.53 (dd, *J* = 17.2, 6.0 Hz, 1H), 2.94-2.88 (m, 2H), 2.67 (t, *J* = 4.0 Hz, 1H), 2.45 (s, 3H), 2.43-2.39 (m, 1H).

**<sup>13</sup>C NMR (100 MHz, CDCl<sub>3</sub>, δ ppm):** 143.9, 141.1, 139.6, 135.9, 131.4, 131.0, 130.1, 129.9, 129.3, 127.2, 118.7, 118.6, 112.6, 52.1, 50.0, 49.9, 45.3, 21.5.

**MS (EI)** *m/z* 368 (M<sup>+</sup>)

#### *N*-(2-(2-ethoxyphenyl)allyl)-4-methyl-*N*-(oxiran-2-ylmethyl)benzenesulfonamide

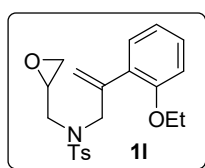

C<sub>21</sub>H<sub>25</sub>NO<sub>4</sub>S

MW: 387.49 g·mol<sup>-1</sup>

The title compound was prepared according to **General Procedure I**.

Colorless Oil

**Yield:** 80%

**<sup>1</sup>H NMR (400 MHz, CDCl<sub>3</sub>, δ ppm):** 7.55 (d, *J* = 8.0 Hz, 2H), 7.25-7.19 (m, 3H), 7.05 (d, *J* = 7.6 Hz, 1H), 6.86 (t, *J* = 7.2 Hz, 1H), 6.77 (d, *J* = 8.4 Hz, 1H), 5.36 (s, 1H), 5.22 (s, 1H), 4.35 (s, 2H), 3.97 (q, *J* = 6.8 Hz, 2H), 3.30 (dd, *J* = 15.2, 4.8 Hz, 1H), 3.23 (dd, *J* = 15.2, 5.2 Hz, 1H), 3.12-3.05 (m, 1H), 2.72 (t, *J* = 4.4 Hz, 1H), 2.51-2.48 (m, 1H), 2.39 (s, 3H), 1.40 (t, *J* = 6.8 Hz, 3H).

**<sup>13</sup>C NMR (100 MHz, CDCl<sub>3</sub>, δ ppm):** 155.9, 143.2, 143.1, 136.7, 130.3, 129.4, 129.0, 128.9, 127.1, 120.4, 117.7, 111.2, 63.5, 52.5, 50.2, 49.7, 46.0, 21.4, 14.7.

**MS (EI)** *m/z* 387 (M<sup>+</sup>)



***N*-(2-(benzo[*d*][1,3]dioxol-5-yl)allyl)-4-methyl-*N*-(oxiran-2-ylmethyl)benzenesulfonamide**

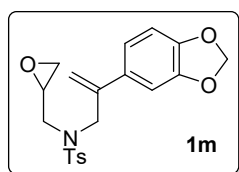

$C_{20}H_{21}ClNO_5S$

**MW:** 387.45 g·mol<sup>-1</sup>

The title compound was prepared according to **General Procedure I**.

Colorless Oil

**Yield:** 77%

**<sup>1</sup>H NMR (400 MHz, CDCl<sub>3</sub>, δ ppm):** 7.58 (d, *J* = 8.0 Hz, 2H), 7.18 (d, *J* = 8.4 Hz, 2H), 6.84-6.80 (m, 2H), 6.63 (d, *J* = 8.0 Hz, 1H), 5.82 (s, 2H), 5.28 (s, 1H), 5.09 (s, 1H), 4.17-4.08 (m, 2H), 3.20 (dd, *J* = 15.2, 4.4 Hz, 1H), 2.98 (dd, *J* = 15.2, 5.6 Hz, 1H), 2.84-2.77 (m, 1H), 2.53 (t, *J* = 4.4 Hz, 1H), 2.32-2.29 (m, 4H).

**<sup>13</sup>C NMR (100 MHz, CDCl<sub>3</sub>, δ ppm):** 147.7, 147.5, 143.7, 142.1, 136.0, 132.3, 129.8, 127.3, 120.2, 115.7, 108.1, 107.0, 101.2, 52.7, 50.1, 49.6, 46.0, 21.5.

**MS (EI)** *m/z* 387 (M<sup>+</sup>)

***N*-(2-(naphthalen-2-yl)allyl)-4-methyl-*N*-(oxiran-2-ylmethyl)benzenesulfonamide**

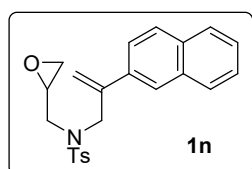

$C_{23}H_{23}NO_3S$

**MW:** 393.50 g·mol<sup>-1</sup>

The title compound was prepared according to **General Procedure I**.

Colorless Viscous Oil

**Yield:** 69%

**<sup>1</sup>H NMR (400 MHz, CDCl<sub>3</sub>, δ ppm):** 7.86 (s, 1H), 7.81-7.76 (m, 3H), 7.65 (d, *J* = 7.6 Hz, 2H), 7.55 (d, *J* = 8.8 Hz, 1H), 7.47-7.45 (m, 2H), 7.20 (d, *J* = 8.0 Hz, 2H), 5.62 (s, 1H), 5.37 (s, 1H), 4.47-4.38 (m, 2H), 3.34 (dd, *J* = 15.2, 4.8 Hz, 1H), 3.12 (dd, *J* = 15.2, 5.6 Hz, 1H), 2.96-2.89 (m, 1H), 2.61 (t, *J* = 4.0 Hz, 1H), 2.43-2.39 (m, 1H), 2.37 (s, 3H).

**<sup>13</sup>C NMR (100 MHz, CDCl<sub>3</sub>, δ ppm):** 143.5, 142.4, 136.0, 135.3, 133.1, 132.9, 129.6, 128.3, 127.9, 127.4, 127.2, 126.1, 126.1, 125.5, 124.4, 117.1, 52.5, 50.1, 49.5, 45.8, 21.4.

**MS (EI)** *m/z* 393 (M<sup>+</sup>)

***N*-(2-(2-methyloxiran-2-yl)methyl)-4-methyl-*N*-(2-phenylallyl)benzenesulfonamide**

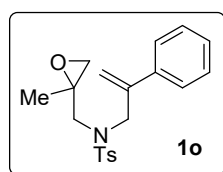

$C_{20}H_{23}NO_3S$

**MW:** 357.47 g·mol<sup>-1</sup>

The title compound was prepared according to **General Procedure II**.

Colorless Oil

**Yield:** 83%

**<sup>1</sup>H NMR (400 MHz, CDCl<sub>3</sub>, δ ppm):** 7.64 (d, *J* = 8.0 Hz, 2H), 7.38-7.36 (m, 2H), 7.32-7.26 (m, 5H), 5.40 (s, 1H), 5.13 (s, 1H), 4.37 (d, *J* = 15.6 Hz, 1H), 4.21 (d, *J* = 15.6 Hz, 1H), 3.29 (d, *J* = 15.2 Hz, 1H), 3.12 (d, *J* = 14.8 Hz, 1H), 2.60 (d, *J* = 4.4 Hz, 1H), 2.52 (d, *J* = 4.4 Hz, 1H), 2.43 (s, 3H), 1.13 (s, 3H).

**<sup>13</sup>C NMR (100 MHz, CDCl<sub>3</sub>, δ ppm):** 143.4, 142.6, 138.4, 136.2, 129.6, 128.3, 127.9, 127.3, 126.5, 116.4, 55.9, 53.3, 52.9, 52.7, 21.5, 18.8.

**MS (EI)** *m/z* 357 (M<sup>+</sup>)

***N*-(2-(3-methoxyphenyl)allyl)-4-methyl-*N*-((2-methyloxiran-2-yl)methyl)benzenesulfonamide**

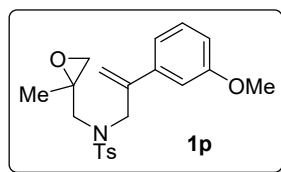

$C_{21}H_{25}NO_4S$

**MW:** 387.49 g·mol<sup>-1</sup>

The title compound was prepared according to **General Procedure II**.

White Solid

**Yield:** 80%

**<sup>1</sup>H NMR (400 MHz, CDCl<sub>3</sub>, δ ppm):** 7.54 (d, *J* = 8.0 Hz, 2H), 7.17 (d, *J* = 8.4 Hz, 2H), 7.13-7.09 (m, 1H), 6.88-6.86 (m, 2H), 6.75-6.72 (m, 1H), 5.32 (s, 1H), 5.06 (s, 1H), 4.28 (d, *J* = 15.6 Hz, 1H), 4.11 (d, *J* = 15.6 Hz, 1H), 3.72 (s, 3H), 3.20 (d, *J* = 14.8 Hz, 1H), 3.05 (d, *J* = 14.8 Hz, 1H), 2.50 (d, *J* = 4.4 Hz, 1H), 2.43 (d, *J* = 4.8 Hz, 1H), 2.32 (s, 3H), 1.06 (s, 3H).

**<sup>13</sup>C NMR (100 MHz, CDCl<sub>3</sub>, δ ppm):** 159.4, 143.3, 142.4, 139.8, 136.1, 129.5, 129.2, 127.1, 118.9, 116.5, 113.6, 112.0, 55.8, 55.1, 53.1, 52.9, 52.8, 21.4, 18.8.

**MS (EI)** *m/z* 387 (M<sup>+</sup>)

***N*-(2-(3-(benzyloxy)phenyl)allyl)-4-methyl-*N*-((2-methyloxiran-2-yl)methyl)benzenesulfonamide**

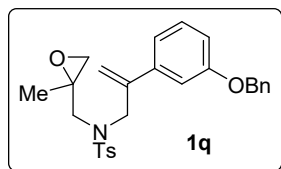

$C_{27}H_{29}NO_4S$

**MW:** 463.59 g·mol<sup>-1</sup>

The title compound was prepared according to **General Procedure II**.

Colorless Viscous Oil

**Yield:** 66%

**<sup>1</sup>H NMR (400 MHz, CDCl<sub>3</sub>, δ ppm):** 7.63 (d, *J* = 8.0 Hz, 2H), 7.44 (d, *J* = 7.6 Hz, 2H), 7.38 (t, *J* = 7.2 Hz, 2H), 7.33-7.30 (m, 1H), 7.25-7.17 (m, 3H), 7.01 (s, 1H), 6.97 (d, *J* = 7.6 Hz, 1H), 6.89 (d, *J* = 8.0 Hz, 1H), 5.39 (s, 1H), 5.13 (s, 1H), 5.07 (s, 2H), 4.36 (d, *J* = 15.6 Hz, 1H), 4.18 (d, *J* = 16.0 Hz, 1H), 3.28 (d, *J* = 14.8 Hz, 1H), 3.12 (d, *J* = 14.8 Hz, 1H), 2.58 (d, *J* = 4.4 Hz, 1H), 2.50 (d, *J* = 4.8 Hz, 1H), 2.39 (s, 3H), 1.14 (s, 3H).

**<sup>13</sup>C NMR (100 MHz, CDCl<sub>3</sub>, δ ppm):** 158.6, 143.4, 142.4, 139.9, 136.9, 136.2, 129.6, 129.3, 128.5, 127.9, 127.5, 127.2, 119.2, 116.5, 114.5, 113.0, 69.9, 55.9, 53.2, 52.8, 21.4, 18.8.

**MS (EI)** *m/z* 463 (M<sup>+</sup>)

***N*-(2-(4-fluorophenyl)allyl)-4-methyl-*N*-((2-methyloxiran-2-yl)methyl)benzenesulfonamide**

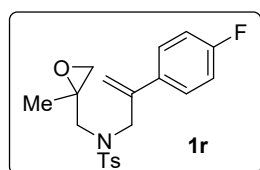

$C_{20}H_{22}FNO_3S$

**MW:** 375.46 g·mol<sup>-1</sup>

The title compound was prepared according to **General Procedure II**.

White Solid

**Yield:** 81%

**<sup>1</sup>H NMR (400 MHz, CDCl<sub>3</sub>, δ ppm):** 7.63 (d, *J* = 7.6 Hz, 2H), 7.37-7.33 (m, 2H), 7.28 (d, *J* = 8.0 Hz, 2H), 6.97 (t, *J* = 8.4 Hz, 2H), 5.36 (s, 1H), 5.14 (s, 1H), 4.32 (d, *J* = 15.6 Hz, 1H), 4.18 (d, *J* = 15.2 Hz, 1H), 3.23 (d, *J* = 14.8 Hz, 1H), 3.16 (d, *J* = 15.2 Hz, 1H), 2.59 (d, *J* = 4.4 Hz, 1H), 2.53 (d, *J* = 4.4 Hz, 1H), 2.43 (s, 3H), 1.13 (s, 3H).

**<sup>13</sup>C NMR (100 MHz, CDCl<sub>3</sub>, δ ppm):** 162.5 (d, *J* = 245.6 Hz), 143.5, 141.7, 136.1, 134.5 (d, *J* = 3.3 Hz), 129.6, 128.3 (d, *J* = 7.9 Hz), 127.3, 116.6, 115.2 (d, *J* = 21.3 Hz), 56.0, 53.1, 52.8, 21.5, 18.9.

**<sup>19</sup>F NMR (376 MHz, CDCl<sub>3</sub>, δ ppm):** -114.1.

**MS (EI)** m/z 375 (M+)

.....

***N*-(2-(4-chlorophenyl)allyl)-4-methyl-*N*-((2-methyloxiran-2-yl)methyl)benzenesulfonamide**

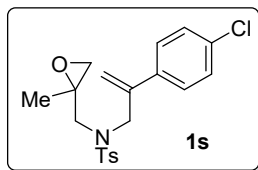

$C_{20}H_{22}ClNO_3S$

**MW:** 391.91 g·mol<sup>-1</sup>

The title compound was prepared according to **General Procedure II**.

White Solid

**Yield:** 70%

**<sup>1</sup>H NMR (400 MHz, CDCl<sub>3</sub>, δ ppm):** 7.61 (d, *J* = 7.6 Hz, 2H), 7.30-7.23 (m, 6H), 5.39 (s, 1H), 5.18 (s, 1H), 4.32 (d, *J* = 16.4 Hz, 1H), 4.19 (d, *J* = 15.6 Hz, 1H), 3.21 (s, 2H), 2.59 (d, *J* = 4.4 Hz, 1H), 2.53 (d, *J* = 4.4 Hz, 1H), 2.43 (s, 3H), 1.15 (s, 3H).

**<sup>13</sup>C NMR (100 MHz, CDCl<sub>3</sub>, δ ppm):** 143.5, 141.6, 136.9, 136.1, 133.8, 129.6, 128.4, 127.9, 127.2, 117.3, 56.0, 52.9, 52.9, 52.7, 21.5, 18.9.

**MS (EI)** m/z 391 (M+)

.....

***N*-(2-(3-cyanophenyl)allyl)-4-methyl-*N*-((2-methyloxiran-2-yl)methyl)benzenesulfonamide**

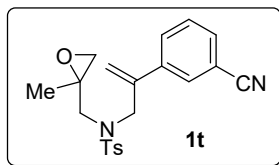

$C_{21}H_{22}N_2O_3S$

**MW:** 382.48 g·mol<sup>-1</sup>

The title compound was prepared according to **General Procedure II**.

White Solid

**Yield:** 71%

**<sup>1</sup>H NMR (400 MHz, CDCl<sub>3</sub>, δ ppm):** 7.66-7.61 (m, 3H), 7.56-7.53 (m, 2H), 7.43-7.39 (m, 1H), 7.28 (d, *J* = 7.6 Hz, 2H), 5.43 (s, 1H), 5.31 (s, 1H), 4.33 (d, *J* = 16.0 Hz, 1H), 4.23 (d, *J* = 15.6 Hz, 1H), 3.40 (d, *J* = 15.2 Hz, 1H), 3.08 (d, *J* = 15.2 Hz, 1H), 2.58 (d, *J* = 4.4 Hz, 1H), 2.55 (d, *J* = 4.4 Hz, 1H), 2.44 (s, 3H), 1.17 (s, 3H).

**<sup>13</sup>C NMR (100 MHz, CDCl<sub>3</sub>, δ ppm):** 143.7, 141.0, 139.9, 136.0, 131.1, 131.0, 130.2, 129.6, 129.0, 127.1, 118.7, 118.5, 112.3, 55.8, 52.9, 52.5, 52.1, 21.4, 18.7.

**MS (EI)** m/z 382 (M+)

.....

***N*-(oxiran-2-ylmethyl)-*N*-(2-phenylallyl)methanesulfonamide**

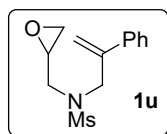

$C_{13}H_{17}NO_3S$

**MW:** 267.34 g·mol<sup>-1</sup>

The title compound was prepared according to **General Procedure III**.

Colorless Oil

**Yield:** 89%

**<sup>1</sup>H NMR (400 MHz, CDCl<sub>3</sub>, δ ppm):** 7.46 (d, *J* = 7.2 Hz, 2H), 7.38-7.30 (m, 3H), 5.51 (s, 1H), 5.37 (s, 1H), 4.46 (s, 2H), 3.47 (dd, *J* = 17.6, 6.0 Hz, 1H), 3.17-3.11 (m, 2H), 2.78 (t, *J* = 4.0 Hz, 1H), 2.72 (s, 3H), 2.54 (dd, *J* = 4.8, 2.4 Hz, 1H).

**<sup>13</sup>C NMR (100 MHz, CDCl<sub>3</sub>, δ ppm):** 142.9, 138.4, 128.5, 128.3, 126.6, 116.9, 51.8, 50.2, 48.7, 45.4, 39.2.

**MS (EI)** m/z 267 (M+)

.....

### *N*-(oxiran-2-ylmethyl)-*N*-(2-phenylallyl)benzenesulfonamide

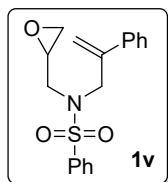

C<sub>18</sub>H<sub>19</sub>NO<sub>3</sub>S

MW: 329.41 g·mol<sup>-1</sup>

The title compound was prepared according to **General Procedure III**.

Colorless Oil

Yield: 75%

**<sup>1</sup>H NMR (400 MHz, CDCl<sub>3</sub>, δ ppm):** 7.79 (d, *J* = 8.0 Hz, 2H), 7.60-7.57 (m, 1H), 7.52-7.48 (m, 2H), 7.42 (d, *J* = 7.2 Hz, 2H), 7.36-7.28 (m, 3H), 5.48 (s, 1H), 5.27 (s, 1H), 4.38-4.30 (m, 2H), 3.33 (dd, *J* = 15.2, 4.8 Hz, 1H), 3.10 (dd, *J* = 15.2, 6.0 Hz, 1H), 2.95-2.87 (m, 1H), 2.63 (t, *J* = 4.0 Hz, 1H), 2.43-2.38 (m, 1H).

**<sup>13</sup>C NMR (100 MHz, CDCl<sub>3</sub>, δ ppm):** 142.5, 139.1, 138.1, 132.7, 129.1, 128.4, 128.1, 127.2, 126.4, 116.5, 52.4, 50.0, 49.6, 45.8.

**MS (EI)** *m/z* 329 (M<sup>+</sup>)

### 4-fluoro-*N*-(oxiran-2-ylmethyl)-*N*-(2-phenylallyl)benzenesulfonamide

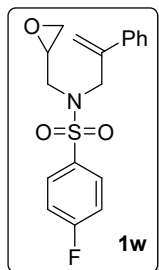

C<sub>18</sub>H<sub>18</sub>FNO<sub>3</sub>S

MW: 347.40 g·mol<sup>-1</sup>

The title compound was prepared according to **General Procedure III**.

White Solid

Yield: 80%

**<sup>1</sup>H NMR (400 MHz, CDCl<sub>3</sub>, δ ppm):** 7.78-7.75 (m, 2H), 7.40-7.38 (m, 2H), 7.35-7.27 (m, 3H), 7.14 (t, *J* = 8.0 Hz, 2H), 5.47 (s, 1H), 5.27 (s, 1H), 4.39-4.30 (m, 2H), 3.35 (dd, *J* = 15.2, 4.4 Hz, 1H), 3.09 (dd, *J* = 15.2, 6.0 Hz, 1H), 2.98-2.92 (m, 1H), 2.65 (t, *J* = 4.0 Hz, 1H), 2.44-2.41 (m, 1H).

**<sup>13</sup>C NMR (100 MHz, CDCl<sub>3</sub>, δ ppm):** 165.0 (d, *J* = 253.4 Hz), 142.4, 138.1, 135.3 (d, *J* = 3.3 Hz), 129.9 (d, *J* = 9.3 Hz), 128.4, 128.1, 126.4, 116.8, 116.2 (d, *J* = 22.4 Hz), 52.3, 50.0, 49.4, 45.7.

**<sup>19</sup>F NMR (376 MHz, CDCl<sub>3</sub>, δ ppm):** -105.0.

**MS (EI)** *m/z* 347 (M<sup>+</sup>)

### 4-methyl-*N*-(oxiran-2-ylmethyl)-*N*-(2-(thiophen-2-yl)allyl)benzenesulfonamide

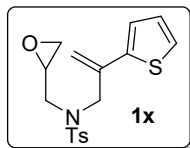

C<sub>17</sub>H<sub>19</sub>NO<sub>3</sub>S<sub>2</sub>

MW: 349.46 g·mol<sup>-1</sup>

The title compound was prepared according to **General Procedure IV**.

Colorless Oil

Yield: 70%

**<sup>1</sup>H NMR (400 MHz, CDCl<sub>3</sub>, δ ppm):** 7.73 (d, *J* = 8.0 Hz, 2H), 7.33 (d, *J* = 8.0 Hz, 2H), 7.27 (d, *J* = 3.6 Hz, 1H), 7.19 (d, *J* = 5.2 Hz, 1H), 6.99 (t, *J* = 4.4 Hz, 1H), 5.55 (s, 1H), 5.14 (s, 1H), 4.28 (d, *J* = 14.8 Hz, 1H), 4.20 (d, *J* = 14.8 Hz, 1H), 3.30 (dd, *J* = 14.8, 4.8 Hz, 1H), 3.16 (dd, *J* = 15.2, 5.6 Hz, 1H), 2.96-2.92 (m, 1H), 2.63 (t, *J* = 4.4 Hz, 1H), 2.44 (s, 3H), 2.41 (dd, *J* = 4.8, 2.8 Hz, 1H).

**<sup>13</sup>C NMR (100 MHz, CDCl<sub>3</sub>, δ ppm):** 143.8, 141.6, 136.2, 136.0, 129.9, 127.7, 127.3, 125.1, 124.9, 115.0, 52.8, 50.1, 49.9, 46.1, 21.6.

**MS (EI)**  $m/z$  349 (M<sup>+</sup>)

.....

**ethyl 2-(((4-methyl-*N*-(oxiran-2-ylmethyl)phenyl)sulfonamido)methyl)acrylate**

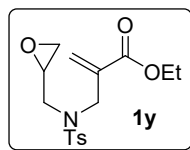

$C_{16}H_{21}NO_5S$

**MW:** 339.41 g·mol<sup>-1</sup>

The title compound was prepared according to **General Procedure V**.

Colorless Oil

**Yield:** 68%

**<sup>1</sup>H NMR (400 MHz, CDCl<sub>3</sub>, δ ppm):** 7.71 (d,  $J = 7.6$  Hz, 2H), 7.31 (d,  $J = 8.0$  Hz, 2H), 6.36 (s, 1H), 5.93 (s, 1H), 4.18 (q,  $J = 7.2$  Hz, 2H), 4.13 (s, 2H), 3.57 (d,  $J = 13.2$  Hz, 1H), 3.07-2.98 (m, 2H), 2.71 (t,  $J = 4.0$  Hz, 1H), 2.46-2.45 (m, 1H), 2.43 (s, 3H), 1.28 (t,  $J = 7.2$  Hz, 3H).

**<sup>13</sup>C NMR (100 MHz, CDCl<sub>3</sub>, δ ppm):** 165.8, 143.6, 136.4, 135.7, 129.8, 127.2, 127.2, 61.0, 51.4, 50.2, 49.1, 45.3, 21.5, 14.1.

**MS (EI)**  $m/z$  339 (M<sup>+</sup>)

.....

**2-(((2-phenylallyl)oxy)methyl)oxirane**

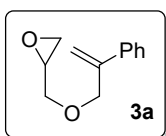

$C_{12}H_{14}O_2$

**MW:** 190.24 g·mol<sup>-1</sup>

The title compound was prepared according to **General Procedure VI**.

Colorless Oil

**Yield:** 66%

**<sup>1</sup>H NMR (400 MHz, CDCl<sub>3</sub>, δ ppm):** 7.46 (d,  $J = 7.6$  Hz, 2H), 7.35-7.26 (m, 3H), 5.54 (s, 1H), 5.35 (s, 1H), 4.47 (d,  $J = 12.8$  Hz, 1H), 4.41 (d,  $J = 12.8$  Hz, 1H), 3.77 (dd,  $J = 11.6, 2.8$  Hz, 1H), 3.44 (dd,  $J = 11.6, 5.6$  Hz, 1H), 3.17-3.12 (m, 1H), 2.77 (t,  $J = 4.4$  Hz, 1H), 2.58 (dd,  $J = 5.2, 2.8$  Hz, 1H).

**<sup>13</sup>C NMR (100 MHz, CDCl<sub>3</sub>, δ ppm):** 143.8, 138.5, 128.3, 127.8, 126.0, 114.6, 73.1, 70.5, 50.8, 44.3.

**MS (EI)**  $m/z$  190 (M<sup>+</sup>)

.....

**2-(((2-(3-methoxyphenyl)allyl)oxy)methyl)oxirane**

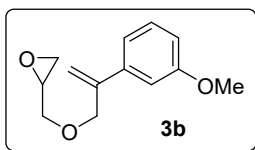

$C_{13}H_{16}O_3$

**MW:** 220.27 g·mol<sup>-1</sup>

The title compound was prepared according to **General Procedure VI**.

Colorless Oil

**Yield:** 58%

**<sup>1</sup>H NMR (400 MHz, CDCl<sub>3</sub>, δ ppm):** 7.25 (t,  $J = 7.6$  Hz, 1H), 7.06-7.02 (m, 2H), 6.84 (d,  $J = 8.0$  Hz, 1H), 5.54 (s, 1H), 5.35 (s, 1H), 4.45 (d,  $J = 12.8$  Hz, 1H), 4.39 (d,  $J = 12.8$  Hz, 1H), 3.81 (s, 3H), 3.78 (d,  $J = 11.6$  Hz, 1H), 3.45 (dd,  $J = 11.6, 6.0$  Hz, 1H), 3.19-3.13 (m, 1H), 2.78 (t,  $J = 4.4$  Hz, 1H), 2.61-2.58 (m, 1H).

**<sup>13</sup>C NMR (100 MHz, CDCl<sub>3</sub>, δ ppm):** 159.5, 143.7, 140.1, 129.3, 118.5, 114.8, 113.0, 111.9, 73.1, 70.5, 55.1, 50.7, 44.2.

**MS (EI)**  $m/z$  220 (M<sup>+</sup>)

.....

### 2-(((2-(3-(benzyloxy)phenyl)allyl)oxy)methyl)oxirane

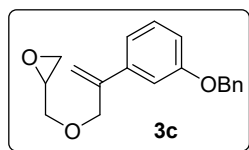

$C_{19}H_{20}O_3$

**MW:** 296.37 g·mol<sup>-1</sup>

The title compound was prepared according to **General Procedure VI**.

Pale Yellow Oil

**Yield:** 55%

**<sup>1</sup>H NMR (400 MHz, CDCl<sub>3</sub>, δ ppm):** 7.44-7.29 (m, 5H), 7.26-7.22 (m, 1H), 7.10-7.05 (m, 2H), 6.90 (d, *J* = 8.0 Hz, 1H), 5.52 (s, 1H), 5.34 (s, 1H), 5.06 (s, 2H), 4.43 (d, *J* = 12.8 Hz, 1H), 4.37 (d, *J* = 12.8 Hz, 1H), 3.75 (dd, *J* = 11.6, 2.4 Hz, 1H), 3.43 (dd, *J* = 11.2, 5.6 Hz, 1H), 3.17-3.11 (m, 1H), 2.76 (t, *J* = 4.8 Hz, 1H), 2.60-2.56 (m, 1H).

**<sup>13</sup>C NMR (100 MHz, CDCl<sub>3</sub>, δ ppm):** 158.7, 143.6, 140.1, 136.9, 129.3, 128.5, 127.9, 127.4, 118.7, 114.9, 113.9, 112.8, 73.0, 70.5, 69.9, 50.7, 44.2.

**MS (EI)** *m/z* 296 (M<sup>+</sup>)

### 2-(((2-(4-fluorophenyl)allyl)oxy)methyl)oxirane

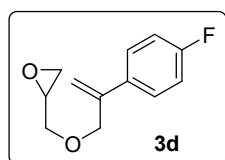

$C_{12}H_{13}FO_2$

**MW:** 208.23 g·mol<sup>-1</sup>

The title compound was prepared according to **General Procedure VI**.

Colorless Oil

**Yield:** 67%

**<sup>1</sup>H NMR (400 MHz, CDCl<sub>3</sub>, δ ppm):** 7.46-7.43 (m, 2H), 7.02 (t, *J* = 8.0 Hz, 2H), 5.48 (s, 1H), 5.32 (s, 1H), 4.44 (d, *J* = 12.8 Hz, 1H), 4.37 (d, *J* = 12.4 Hz, 1H), 3.77 (d, *J* = 11.2 Hz, 1H), 3.42 (dd, *J* = 11.6, 6.0 Hz, 1H), 3.17-3.12 (m, 1H), 2.77 (t, *J* = 4.4 Hz, 1H), 2.60-2.56 (m, 1H).

**<sup>13</sup>C NMR (100 MHz, CDCl<sub>3</sub>, δ ppm):** 162.4 (d, *J* = 245.2 Hz), 142.8, 134.5 (d, *J* = 3.3 Hz), 127.6 (d, *J* = 7.9 Hz), 115.1 (d, *J* = 21.2 Hz), 114.6 (d, *J* = 4.4 Hz), 73.1, 70.4, 50.7, 44.1.

**<sup>19</sup>F NMR (376 MHz, CDCl<sub>3</sub>, δ ppm):** -114.4.

**MS (EI)** *m/z* 208 (M<sup>+</sup>)

### 2-(((2-(4-chlorophenyl)allyl)oxy)methyl)oxirane

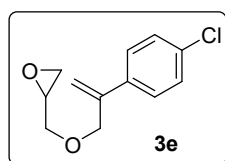

$C_{12}H_{13}ClO_2$

**MW:** 224.68 g·mol<sup>-1</sup>

The title compound was prepared according to **General Procedure VI**.

Colorless Oil

**Yield:** 70%

**<sup>1</sup>H NMR (400 MHz, CDCl<sub>3</sub>, δ ppm):** 7.41 (d, *J* = 8.0 Hz, 2H), 7.30 (d, *J* = 7.6 Hz, 2H), 5.53 (s, 1H), 5.36 (s, 1H), 4.44 (d, *J* = 12.4 Hz, 1H), 4.38 (d, *J* = 12.8 Hz, 1H), 3.77 (d, *J* = 11.6 Hz, 1H), 3.42 (dd, *J* = 11.6, 6.0 Hz, 1H), 3.19-3.11 (m, 1H), 2.78 (t, *J* = 4.4 Hz, 1H), 2.59-2.58 (m, 1H).

**<sup>13</sup>C NMR (100 MHz, CDCl<sub>3</sub>, δ ppm):** 142.8, 136.9, 133.6, 128.5, 127.4, 115.3, 73.0, 70.5, 50.8, 44.2.

**MS (EI)** *m/z* 224 (M<sup>+</sup>)

### 3-(3-(oxiran-2-ylmethoxy)prop-1-en-2-yl)benzonitrile

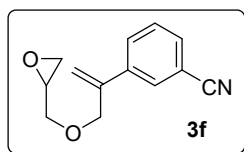

$C_{13}H_{13}NO_2$

MW: 215.25 g·mol<sup>-1</sup>

The title compound was prepared according to **General Procedure VI**.

Pale Yellow Oil

Yield: 61%

**<sup>1</sup>H NMR (400 MHz, CDCl<sub>3</sub>, δ ppm):** 7.76 (s, 1H), 7.72 (d, *J* = 8.0 Hz, 1H), 7.58 (d, *J* = 7.6 Hz, 1H), 7.48-7.44 (m, 1H), 5.61 (s, 1H), 5.47 (s, 1H), 4.47 (d, *J* = 12.8 Hz, 1H), 4.40 (d, *J* = 12.8 Hz, 1H), 3.81 (d, *J* = 11.2 Hz, 1H), 3.42 (dd, *J* = 11.2, 5.6 Hz, 1H), 3.19-3.13 (m, 1H), 2.80 (t, *J* = 4.4 Hz, 1H), 2.62-2.57 (m, 1H).

**<sup>13</sup>C NMR (100 MHz, CDCl<sub>3</sub>, δ ppm):** 142.1, 139.7, 131.1, 130.4, 129.7, 129.2, 118.7, 117.1, 112.5, 72.8, 70.6, 50.7, 44.0.

**MS (EI)** *m/z* 215 (M<sup>+</sup>)

### 4-(3-(oxiran-2-ylmethoxy)prop-1-en-2-yl)benzonitrile

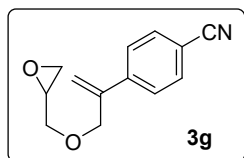

$C_{13}H_{13}NO_2$

MW: 215.25 g·mol<sup>-1</sup>

The title compound was prepared according to **General Procedure VI**.

Colorless Oil

Yield: 51%

**<sup>1</sup>H NMR (400 MHz, CDCl<sub>3</sub>, δ ppm):** 7.60 (d, *J* = 8.0 Hz, 2H), 7.55 (d, *J* = 8.0 Hz, 2H), 5.63 (s, 1H), 5.48 (s, 1H), 4.45 (d, *J* = 12.8 Hz, 1H), 4.39 (d, *J* = 12.4 Hz, 1H), 3.79 (d, *J* = 11.6 Hz, 1H), 3.38 (dd, *J* = 11.2, 6.0 Hz, 1H), 3.16-3.10 (m, 1H), 2.77 (t, *J* = 4.8 Hz, 1H), 2.59-2.54 (m, 1H).

**<sup>13</sup>C NMR (100 MHz, CDCl<sub>3</sub>, δ ppm):** 142.9, 142.4, 132.1, 126.6, 118.7, 117.8, 111.1, 72.6, 70.6, 50.6, 44.0.

**MS (EI)** *m/z* 215 (M<sup>+</sup>)

### 2-(((2-(naphthalen-2-yl)allyl)oxy)methyl)oxirane

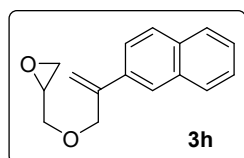

$C_{16}H_{16}O_2$

MW: 240.30 g·mol<sup>-1</sup>

The title compound was prepared according to **General Procedure VI**.

Colorless Oil

Yield: 60%

**<sup>1</sup>H NMR (400 MHz, CDCl<sub>3</sub>, δ ppm):** 7.92 (s, 1H), 7.86-7.81 (m, 3H), 7.64 (d, *J* = 8.4 Hz, 1H), 7.50-7.45 (m, 2H), 5.71 (s, 1H), 5.47 (s, 1H), 4.61 (d, *J* = 12.8 Hz, 1H), 4.54 (d, *J* = 12.8 Hz, 1H), 3.82 (d, *J* = 11.6 Hz, 1H), 3.50 (dd, *J* = 11.6, 5.6 Hz, 1H), 3.21-3.16 (m, 1H), 2.79 (t, *J* = 4.8 Hz, 1H), 2.63-2.61 (m, 1H).

**<sup>13</sup>C NMR (100 MHz, CDCl<sub>3</sub>, δ ppm):** 143.6, 135.7, 133.3, 132.9, 128.2, 127.9, 127.5, 126.1, 126.0, 124.9, 124.2, 115.2, 73.2, 70.5, 50.8, 44.3.

**MS (EI)** *m/z* 240 (M<sup>+</sup>)

### 2-(((2-(thiophen-2-yl)allyl)oxy)methyl)oxirane

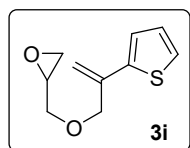

$C_{10}H_{12}O_2S$

MW: 196.26 g·mol<sup>-1</sup>

The title compound was prepared according to **General Procedure VI**.

Pale Yellow Oil

Yield: 56%

**<sup>1</sup>H NMR (400 MHz, CDCl<sub>3</sub>, δ ppm):** 7.19 (d, *J* = 4.8 Hz, 1H), 7.15 (d, *J* = 3.2 Hz, 1H), 6.99 (t, *J* = 4.4 Hz, 1H), 5.56 (s, 1H), 5.24 (s, 1H), 4.42 (d, *J* = 12.4 Hz, 1H), 4.36 (d, *J* = 12.4 Hz, 1H), 3.79 (d, *J* = 11.2 Hz, 1H), 3.46 (dd, *J* = 11.6, 6.0 Hz, 1H), 3.21-3.15 (m, 1H), 2.80 (t, *J* = 4.8 Hz, 1H), 2.63-2.61 (m, 1H).

**<sup>13</sup>C NMR (100 MHz, CDCl<sub>3</sub>, δ ppm):** 142.1, 137.7, 127.3, 124.5, 124.0, 113.2, 73.2, 70.5, 50.7, 44.2.

**MS (EI)** *m/z* 196 (M<sup>+</sup>)

.....  
**2-methyl-2-(((2-phenylallyl)oxy)methyl)oxirane**

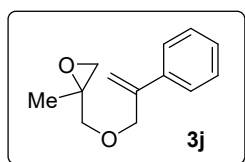

C<sub>13</sub>H<sub>16</sub>O<sub>2</sub>

**MW:** 204.27 g·mol<sup>-1</sup>

The title compound was prepared according to **General Procedure VII**.

Colorless Oil

**Yield:** 67%

**<sup>1</sup>H NMR (400 MHz, CDCl<sub>3</sub>, δ ppm):** 7.46 (d, *J* = 7.6 Hz, 2H), 7.35-7.25 (m, 3H), 5.53 (s, 1H), 5.34 (s, 1H), 4.44 (d, *J* = 12.8 Hz, 1H), 4.40 (d, *J* = 12.8 Hz, 1H), 3.56 (d, *J* = 11.2 Hz, 1H), 3.45 (d, *J* = 10.8 Hz, 1H), 2.71 (d, *J* = 4.8 Hz, 1H), 2.60 (d, *J* = 4.8 Hz, 1H), 1.33 (s, 3H).

**<sup>13</sup>C NMR (100 MHz, CDCl<sub>3</sub>, δ ppm):** 143.9, 138.5, 128.3, 127.7, 126.0, 114.5, 73.1, 73.0, 56.0, 51.5, 18.4.

**MS (EI)** *m/z* 204 (M<sup>+</sup>)

.....  
**diethyl 2-(oxiran-2-ylmethyl)-2-(2-phenylallyl)malonate**

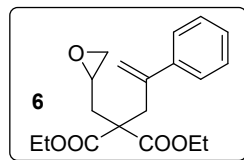

C<sub>19</sub>H<sub>24</sub>O<sub>5</sub>

**MW:** 332.40 g·mol<sup>-1</sup>

The title compound was prepared according to **General Procedure VIII**.

Pale Yellow Oil

**Yield:** 75%

**<sup>1</sup>H NMR (400 MHz, CDCl<sub>3</sub>, δ ppm):** 7.32-7.22 (m, 5H), 5.27 (s, 1H), 5.19 (s, 1H), 4.04-3.88 (m, 3H), 3.79-3.71 (m, 1H), 3.32 (d, *J* = 14.4 Hz, 1H), 3.26 (d, *J* = 14.4 Hz, 1H), 2.96-2.91 (m, 1H), 2.67 (t, *J* = 4.4 Hz, 1H), 2.34 (dd, *J* = 5.2, 2.8 Hz, 1H), 2.10 (dd, *J* = 14.8, 4.8 Hz, 1H), 1.91 (dd, *J* = 14.8, 7.2 Hz, 1H), 1.18 (t, *J* = 7.2 Hz, 3H), 1.14 (t, *J* = 7.2 Hz, 3H). **<sup>13</sup>C NMR (100 MHz, CDCl<sub>3</sub>, δ ppm):** 170.6, 170.5, 144.2, 141.5, 128.0, 127.5, 126.9, 118.9, 61.3, 61.2, 55.9, 48.5, 46.7, 38.5, 35.5, 13.8, 13.7.

**MS (EI)** *m/z* 332 (M<sup>+</sup>)



### 3. General Procedure and Analytical Data of 7-Endo Heck Products

**General procedures for synthesis of 2 and 4 (standard condition).** Pd(PPh<sub>3</sub>)<sub>4</sub> (10 mol%, 23.0 mg, 0.02 mmol), L4 (20 mol%, 21.6 mg, 0.04 mmol) and Et<sub>3</sub>N·HI (20 mol%, 9.2 mg, 0.40 mmol) were added to an oven-dried Schlenk tube. Then a solution of epoxide 1 or 3 (1.0 equiv, 0.20 mmol) in toluene (2 mL) was added. The resulting mixture was stirred at 130 °C for 12 h under nitrogen atmosphere (9 h for oxygen bridging substrates 3). After cooling the reaction mixture at room temperature, it was quenched with a saturated aqueous solution of NH<sub>4</sub>Cl (10 mL). The aqueous layer was extracted with EtOAc (3×8 mL). The combined organic phase was sequentially washed with saturated aqueous solution of NaCl and concentrated *in vacuo*. The resulting mixture was purified by silica gel column chromatography (hexanes/EtOAc = 2:1) to afford the 7-endo Heck product 2 or 4.

#### Analytical Data:

##### 6-phenyl-1-tosyl-2,3,4,7-tetrahydro-1H-azepin-3-ol

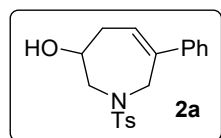

C<sub>19</sub>H<sub>21</sub>NO<sub>3</sub>S                      MW: 343.44 g·mol<sup>-1</sup>

White Solid

Isolated Amount: 58.8 mg                      Yield: 86%

**<sup>1</sup>H NMR (400 MHz, CDCl<sub>3</sub>, δ ppm):** 7.69 (d, *J* = 8.4 Hz, 2H), 7.41 (d, *J* = 7.2 Hz, 2H), 7.35-7.25 (m, 5H), 5.93 (t, *J* = 6.4 Hz, 1H), 4.42 (d, *J* = 16.0 Hz, 1H), 4.07-4.00 (m, 2H), 3.54-3.45 (m, 2H), 2.72-2.65 (m, 1H), 2.58-2.49 (m, 2H), 2.42 (s, 3H).

**<sup>13</sup>C NMR (100 MHz, CDCl<sub>3</sub>, δ ppm):** 143.6, 141.0, 135.4, 129.8, 128.4, 127.5, 127.1, 126.1, 125.2, 67.7, 56.6, 51.7, 34.5, 21.5.

**MS (EI)** *m/z* 343 (M<sup>+</sup>); **HRMS (ESI)** Calcd for C<sub>19</sub>H<sub>21</sub>NO<sub>3</sub>S-H 342.1164, Found 342.1162.

##### 6-(4-methoxyphenyl)-1-tosyl-2,3,4,7-tetrahydro-1H-azepin-3-ol

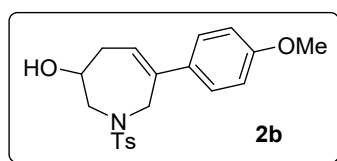

C<sub>20</sub>H<sub>23</sub>NO<sub>4</sub>S                      MW: 373.47 g·mol<sup>-1</sup>

Light Yellow Oil

Isolated Amount: 26.0 mg                      Yield: 35%

**<sup>1</sup>H NMR (400 MHz, CDCl<sub>3</sub>, δ ppm):** 7.70 (d, *J* = 8.4 Hz, 2H), 7.37 (d, *J* = 8.4 Hz, 2H), 7.30 (d, *J* = 8.0 Hz, 2H), 6.87 (d, *J* = 8.8 Hz, 2H), 5.86 (t, *J* = 6.8 Hz, 1H), 4.40 (d, *J* = 16.0 Hz, 1H), 4.03-3.97 (m, 2H), 3.81 (s, 3H), 3.52 (dd, *J* = 13.6, 5.2 Hz, 1H), 3.44 (dd, *J* = 13.6, 3.6 Hz, 1H), 2.70-2.63 (m, 1H), 2.52 (ddd, *J* = 14.8, 6.8, 2.8 Hz, 1H), 2.44-2.42 (m, 4H).

**<sup>13</sup>C NMR (100 MHz, CDCl<sub>3</sub>, δ ppm):** 159.1, 143.6, 140.6, 135.5, 133.5, 129.8, 127.3, 127.1, 123.6, 113.8, 67.6, 56.8, 55.3, 51.7, 34.4, 21.5.

**MS (EI)** *m/z* 373 (M<sup>+</sup>); **HRMS (ESI)** Calcd for C<sub>20</sub>H<sub>23</sub>NO<sub>4</sub>S-H 372.1270, Found 372.1275.

### 6-(4-fluorophenyl)-1-tosyl-2,3,4,7-tetrahydro-1*H*-azepin-3-ol

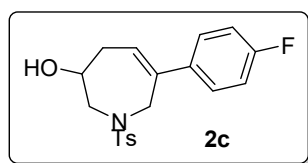

C<sub>19</sub>H<sub>20</sub>FNO<sub>3</sub>S

MW: 361.43 g·mol<sup>-1</sup>

White Solid

Isolated Amount: 59.2 mg

Yield: 82%

**<sup>1</sup>H NMR (400 MHz, CDCl<sub>3</sub>, δ ppm):** 7.69 (d, *J* = 7.6 Hz, 2H), 7.42-7.39 (m, 2H), 7.31 (d, *J* = 8.0 Hz, 2H), 7.01 (t, *J* = 8.4 Hz, 2H), 5.89 (t, *J* = 6.4 Hz, 1H), 4.37 (d, *J* = 16.0 Hz, 1H), 4.08-4.01 (m, 1H), 3.99 (d, *J* = 16.0 Hz, 1H), 3.52 (dd, *J* = 13.6, 5.2 Hz, 1H), 3.46 (dd, *J* = 13.2, 3.2 Hz, 1H), 2.72-2.64 (m, 1H), 2.54 (dd, *J* = 14.4, 6.0 Hz, 1H), 2.49-2.41 (m, 4H).

**<sup>13</sup>C NMR (100 MHz, CDCl<sub>3</sub>, δ ppm):** 162.3 (d, *J* = 245.3 Hz), 143.7, 140.4, 137.1 (d, *J* = 3.2 Hz), 135.4, 129.8, 127.9 (d, *J* = 7.9 Hz), 127.1, 125.3, 115.3 (d, *J* = 21.3 Hz), 67.5, 56.8, 51.7, 34.5, 21.5.

**<sup>19</sup>F NMR (376 MHz, CDCl<sub>3</sub>, δ ppm):** -114.8.

**MS (EI)** *m/z* 361 (M<sup>+</sup>); **HRMS (ESI)** Calcd for C<sub>19</sub>H<sub>20</sub>FNO<sub>3</sub>S-H 360.1070, Found 360.1077.

### 6-(4-chlorophenyl)-1-tosyl-2,3,4,7-tetrahydro-1*H*-azepin-3-ol

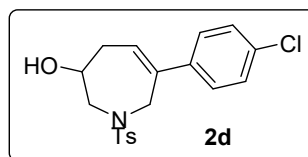

C<sub>19</sub>H<sub>20</sub>ClNO<sub>3</sub>S

MW: 377.88 g·mol<sup>-1</sup>

White Solid

Isolated Amount: 59.8 mg

Yield: 79%

**<sup>1</sup>H NMR (400 MHz, CDCl<sub>3</sub>, δ ppm):** 7.58 (d, *J* = 8.4 Hz, 2H), 7.36 (d, *J* = 8.8 Hz, 2H), 7.32-7.26 (m, 4H), 5.93 (t, *J* = 6.8 Hz, 1H), 4.34 (d, *J* = 16.0 Hz, 1H), 4.07-3.98 (m, 2H), 3.53-3.44 (m, 2H), 2.71-2.64 (m, 1H), 2.57-2.46 (m, 2H), 2.42 (s, 3H).

**<sup>13</sup>C NMR (100 MHz, CDCl<sub>3</sub>, δ ppm):** 143.7, 140.3, 139.4, 135.4, 133.4, 129.8, 128.6, 127.5, 127.1, 126.0, 67.4, 56.8, 51.4, 34.6, 21.5.

**MS (EI)** *m/z* 377 (M<sup>+</sup>); **HRMS (ESI)** Calcd for C<sub>19</sub>H<sub>20</sub>ClNO<sub>3</sub>S-H 376.0774, Found 376.0777.

### 6-(4-bromophenyl)-1-tosyl-2,3,4,7-tetrahydro-1*H*-azepin-3-ol

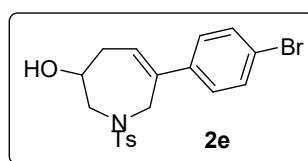

C<sub>19</sub>H<sub>20</sub>BrNO<sub>3</sub>S

MW: 422.34 g·mol<sup>-1</sup>

Off-White Solid

Isolated Amount: 55.0 mg

Yield: 65%

**<sup>1</sup>H NMR (400 MHz, CDCl<sub>3</sub>, δ ppm):** 7.69 (d, *J* = 8.0 Hz, 2H), 7.45 (d, *J* = 8.4 Hz, 2H), 7.32-7.29 (m, 4H), 5.94 (t, *J* = 6.8 Hz, 1H), 4.37 (d, *J* = 15.6 Hz, 1H), 4.08-4.01 (m, 1H), 3.99 (d, *J* = 16.0 Hz, 1H), 3.53 (dd, *J* = 13.6, 4.8 Hz, 1H), 3.46 (dd, *J* = 13.6, 4.0 Hz, 1H), 2.72-2.65 (m, 1H), 2.54 (ddd, *J* = 15.2, 6.8, 2.8 Hz, 1H), 2.43 (s, 3H), 2.35 (d, *J* = 8.4 Hz, 1H).

**<sup>13</sup>C NMR (100 MHz, CDCl<sub>3</sub>, δ ppm):** 143.7, 140.4, 139.9, 135.4, 131.6, 129.9, 127.8, 127.1, 126.0, 121.6, 67.4, 56.8, 51.4, 34.6, 21.5.

**MS (EI)** *m/z* 421, 423 (M<sup>+</sup>); **HRMS (ESI)** Calcd for C<sub>19</sub>H<sub>20</sub>BrNO<sub>3</sub>S-H 420.0269, Found 420.0273.

#### 4-(6-hydroxy-1-tosyl-2,5,6,7-tetrahydro-1*H*-azepin-3-yl)benzonitrile

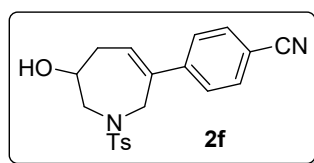

C<sub>20</sub>H<sub>20</sub>N<sub>2</sub>O<sub>3</sub>S

MW: 368.45 g·mol<sup>-1</sup>

Light Yellow Oil

Isolated Amount: 52.1 mg

Yield: 71%

**<sup>1</sup>H NMR (400 MHz, CDCl<sub>3</sub>, δ ppm):** 7.68 (d, *J* = 8.0 Hz, 2H), 7.60 (d, *J* = 8.0 Hz, 2H), 7.56 (d, *J* = 8.0 Hz, 2H), 7.31 (d, *J* = 8.0 Hz, 2H), 6.08 (t, *J* = 6.4 Hz, 1H), 4.27 (d, *J* = 16.0 Hz, 1H), 4.09 (d, *J* = 16.0 Hz, 1H), 4.06-3.99 (m, 1H), 3.57 (dd, *J* = 13.6, 2.8 Hz, 1H), 3.44 (dd, *J* = 13.6, 6.0 Hz, 1H), 2.81 (d, *J* = 5.2 Hz, 1H), 2.72-2.64 (m, 1H), 2.59 (dd, *J* = 14.0, 6.4 Hz, 1H), 2.43 (s, 3H).

**<sup>13</sup>C NMR (100 MHz, CDCl<sub>3</sub>, δ ppm):** 145.4, 143.8, 140.2, 135.1, 132.2, 129.8, 129.1, 127.0, 126.7, 118.7, 110.7, 66.8, 57.0, 50.6, 34.9, 21.4.

**MS (EI)** *m/z* 368 (M<sup>+</sup>); **HRMS (ESI)** Calcd for C<sub>20</sub>H<sub>20</sub>N<sub>2</sub>O<sub>3</sub>S-H 367.1116, Found 367.1115.

#### 6-(3-methoxyphenyl)-1-tosyl-2,3,4,7-tetrahydro-1*H*-azepin-3-ol

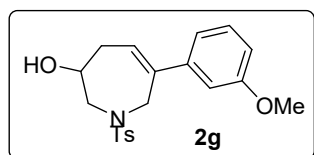

C<sub>20</sub>H<sub>23</sub>NO<sub>4</sub>S

MW: 373.47 g·mol<sup>-1</sup>

Light Yellow Oil

Isolated Amount: 57.2 mg

Yield: 77%

**<sup>1</sup>H NMR (400 MHz, CDCl<sub>3</sub>, δ ppm):** 7.69 (d, *J* = 8.0 Hz, 2H), 7.30 (d, *J* = 8.0 Hz, 2H), 7.24 (t, *J* = 8.0 Hz, 1H), 7.02-6.98 (m, 2H), 6.83 (dd, *J* = 8.0, 2.4 Hz, 1H), 5.95 (t, *J* = 6.8 Hz, 1H), 4.38 (d, *J* = 15.6 Hz, 1H), 4.06-3.99 (m, 2H), 3.83 (s, 3H), 3.53-3.44 (m, 2H), 2.71-2.63 (m, 1H), 2.57-2.51 (m, 2H), 2.42 (s, 3H).

**<sup>13</sup>C NMR (100 MHz, CDCl<sub>3</sub>, δ ppm):** 159.6, 143.6, 142.5, 141.0, 135.3, 129.8, 129.4, 127.1, 125.4, 118.5, 113.3, 111.6, 67.5, 56.8, 55.3, 51.7, 34.5, 21.5.

**MS (EI)** *m/z* 373 (M<sup>+</sup>); **HRMS (ESI)** Calcd for C<sub>20</sub>H<sub>23</sub>NO<sub>4</sub>S-H 372.1270, Found 372.1272.

**HPLC analysis** CHIRALCEL AD-H column, 1.0 mL/min (20% *i*-PrOH in hexane), 254 nm UV detector, *t*<sub>S</sub> = 11.647 min (peak area = 50.17%), *t*<sub>R</sub> = 12.823 min (peak area = 49.83%).

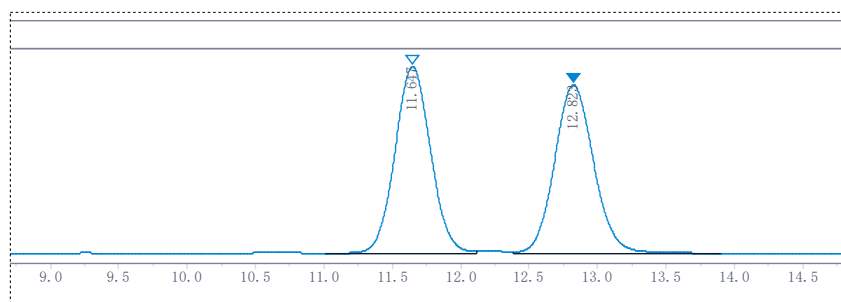

| Peak# | RT (min) | Area (mAU·s) | Area (%) | Starting (min) | Ending (min) |
|-------|----------|--------------|----------|----------------|--------------|
| 1     | 11.647   | 6498.822     | 50.17    | 11.008         | 12.114       |
| 2     | 12.823   | 6455.586     | 49.83    | 12.380         | 13.897       |

**(S)-6-(3-methoxyphenyl)-1-tosyl-2,3,4,7-tetrahydro-1H-azepin-3-ol**

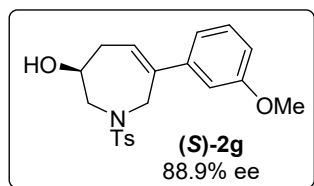

**(S)-2g (89% ee)** was prepared from **(R)-1g (90% ee)**

$C_{20}H_{23}NO_4S$

MW: 373.47 g·mol<sup>-1</sup>

Light Yellow Oil

Isolated Amount: 53.8 mg

Yield: 72%

**<sup>1</sup>H NMR (400 MHz, CDCl<sub>3</sub>, δ ppm):** 7.68 (d, *J* = 7.6 Hz, 2H), 7.28 (d, *J* = 7.6 Hz, 2H), 7.22 (t, *J* = 8.0 Hz, 1H), 7.02 (s, 1H), 6.98 (d, *J* = 7.6 Hz, 1H), 6.81 (d, *J* = 8.0 Hz, 1H), 5.94 (t, *J* = 6.4 Hz, 1H), 4.30 (d, *J* = 15.6 Hz, 1H), 4.04 (d, *J* = 16.4 Hz, 1H), 4.02-3.95 (m, 1H), 3.81 (s, 3H), 3.53-3.50 (m, 1H), 3.43 (dd, *J* = 13.2, 5.2 Hz, 1H), 2.77 (d, *J* = 4.8 Hz, 1H), 2.67-2.59 (m, 1H), 2.52 (dd, *J* = 14.8, 6.8 Hz, 1H), 2.40 (s, 3H).

**<sup>13</sup>C NMR (100 MHz, CDCl<sub>3</sub>, δ ppm):** 159.5, 143.5, 142.5, 140.9, 135.3, 129.7, 129.3, 127.0, 125.5, 118.4, 113.1, 111.5, 67.3, 56.8, 55.2, 51.4, 34.6, 21.4.

**MS (EI)** *m/z* 373 (M<sup>+</sup>); **HRMS (ESI)** Calcd for C<sub>20</sub>H<sub>23</sub>NO<sub>4</sub>S-H 372.1270, Found 372.1270.

**HPLC analysis** CHIRALCEL AD-H column, 1.0 mL/min (20% *i*-PrOH in hexane), 254 nm UV detector, *t*<sub>S</sub> = 11.230 min (peak area = 94.46%), *t*<sub>R</sub> = 12.412 min (peak area = 5.54%).

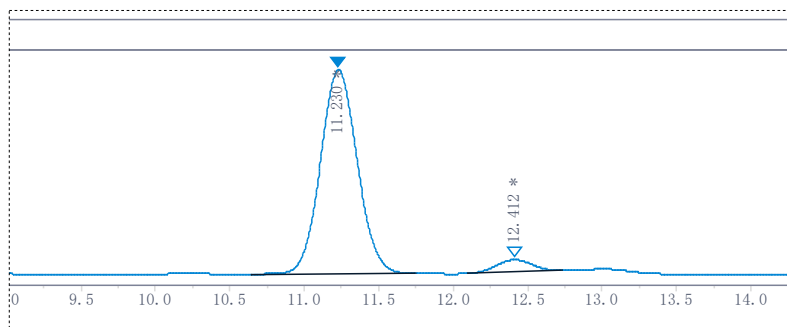

| Peak# | RT (min) | Area (mAU·s) | Area (%) | Starting (min) | Ending (min) |
|-------|----------|--------------|----------|----------------|--------------|
| 1     | 11.230   | 7634.955     | 94.46    | 10.645         | 11.751       |
| 2     | 12.412   | 345.419      | 5.54     | 12.091         | 12.730       |

**6-(3-(benzyloxy)phenyl)-1-tosyl-2,3,4,7-tetrahydro-1H-azepin-3-ol**

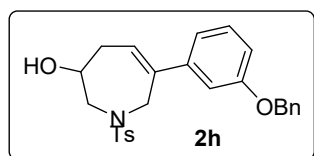

$C_{26}H_{27}NO_4S$

MW: 449.57 g·mol<sup>-1</sup>

Light Yellow Oil

Isolated Amount: 62.1 mg

Yield: 69%

**<sup>1</sup>H NMR (400 MHz, CDCl<sub>3</sub>, δ ppm):** 7.67 (d, *J* = 8.0 Hz, 2H), 7.44 (d, *J* = 8.0 Hz, 2H), 7.35 (t, *J* = 6.8 Hz, 2H), 7.32-7.21 (m, 4H), 7.10 (s, 1H), 7.01 (d, *J* = 7.6 Hz, 1H), 6.89 (d, *J* = 8.4 Hz, 1H), 5.94 (t, *J* = 6.4 Hz, 1H), 5.08 (s, 2H), 4.34 (d, *J* = 15.6 Hz, 1H), 4.06-3.96 (m, 2H), 3.51-3.43 (m, 2H), 2.75-2.58 (m, 2H), 2.55-2.49 (m, 1H), 2.40 (s, 3H).

**<sup>13</sup>C NMR (100 MHz, CDCl<sub>3</sub>, δ ppm):** 158.7, 143.6, 142.5, 140.9, 136.8, 135.3, 129.8, 129.4, 128.5, 127.9, 127.5, 127.1, 125.5, 118.8, 114.0, 112.5, 69.8, 67.5, 56.7, 51.5, 34.5, 21.4.

**MS (EI)** *m/z* 449 (M<sup>+</sup>); **HRMS (ESI)** Calcd for C<sub>26</sub>H<sub>27</sub>NO<sub>4</sub>S-H 448.1583, Found 448.1585.

### 6-(3-bromophenyl)-1-tosyl-2,3,4,7-tetrahydro-1H-azepin-3-ol

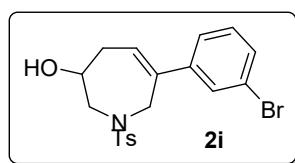

$C_{19}H_{20}BrNO_3S$

MW: 422.34 g·mol<sup>-1</sup>

Off-White Solid

Isolated Amount: 58.9 mg

Yield: 70%

**<sup>1</sup>H NMR (400 MHz, CDCl<sub>3</sub>, δ ppm):** 7.69 (d, *J* = 8.4 Hz, 2H), 7.50-7.49 (m, 1H), 7.40-7.36 (m, 2H), 7.30 (d, *J* = 8.0 Hz, 2H), 7.20 (t, *J* = 7.6 Hz, 1H), 5.94 (t, *J* = 6.8 Hz, 1H), 4.34 (d, *J* = 16.0 Hz, 1H), 4.07-3.99 (m, 2H), 3.54-3.46 (m, 2H), 2.72-2.64 (m, 1H), 2.55 (ddd, *J* = 15.2, 6.8, 3.2 Hz, 1H), 2.43-2.41 (m, 4H).

**<sup>13</sup>C NMR (100 MHz, CDCl<sub>3</sub>, δ ppm):** 143.7, 143.1, 139.9, 135.4, 130.4, 130.0, 129.8, 129.2, 127.1, 126.7, 124.7, 122.5, 67.5, 56.6, 51.3, 34.5, 21.5.

**MS (EI)** *m/z* 421, 423 (M<sup>+</sup>); **HRMS (ESI)** Calcd for C<sub>19</sub>H<sub>20</sub>BrNO<sub>3</sub>S-H 420.0269, Found 420.0269.

### 6-(3-nitrophenyl)-1-tosyl-2,3,4,7-tetrahydro-1H-azepin-3-ol

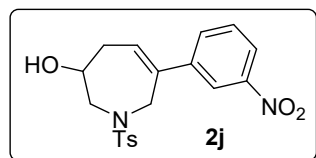

$C_{19}H_{20}N_2O_5S$

MW: 388.44 g·mol<sup>-1</sup>

Off-White Solid

Isolated Amount: 51.1 mg

Yield: 66%

**<sup>1</sup>H NMR (400 MHz, CDCl<sub>3</sub>, δ ppm):** 8.23-8.21 (m, 1H), 8.14 (dd, *J* = 8.4, 2.0 Hz, 1H), 7.86 (d, *J* = 8.0 Hz, 1H), 7.70 (d, *J* = 8.4 Hz, 2H), 7.53 (t, *J* = 8.0 Hz, 1H), 7.32 (d, *J* = 8.0 Hz, 2H), 6.10 (t, *J* = 6.8 Hz, 1H), 4.42 (d, *J* = 16.0 Hz, 1H), 4.13-4.05 (m, 2H), 3.56 (dd, *J* = 13.6, 4.8 Hz, 1H), 3.51 (dd, *J* = 13.6, 3.6 Hz, 1H), 2.80-2.72 (m, 1H), 2.61 (ddd, *J* = 15.2, 6.8, 2.8 Hz, 1H), 2.43 (s, 3H), 2.28 (d, *J* = 8.0 Hz, 1H).

**<sup>13</sup>C NMR (100 MHz, CDCl<sub>3</sub>, δ ppm):** 148.3, 143.9, 142.6, 139.8, 135.4, 132.2, 129.9, 129.6, 128.4, 127.1, 122.3, 121.1, 67.3, 56.9, 51.2, 34.7, 21.5.

**MS (EI)** *m/z* 388 (M<sup>+</sup>); **HRMS (ESI)** Calcd for C<sub>19</sub>H<sub>20</sub>N<sub>2</sub>O<sub>5</sub>S-H 387.1015, Found 387.1014.

### 3-(6-hydroxy-1-tosyl-2,5,6,7-tetrahydro-1H-azepin-3-yl)benzonitrile

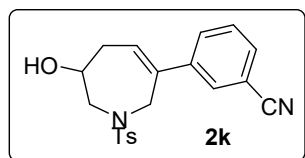

$C_{20}H_{20}N_2O_3S$

MW: 368.45 g·mol<sup>-1</sup>

Light Yellow Oil

Isolated Amount: 55.9 mg

Yield: 76%

**<sup>1</sup>H NMR (400 MHz, CDCl<sub>3</sub>, δ ppm):** 7.73 (d, *J* = 8.0 Hz, 1H), 7.69 (d, *J* = 8.0 Hz, 2H), 7.64 (s, 1H), 7.54 (d, *J* = 7.6 Hz, 1H), 7.46-7.43 (m, 1H), 7.31 (d, *J* = 8.0 Hz, 2H), 6.01 (t, *J* = 6.4 Hz, 1H), 4.27 (d, *J* = 16.0 Hz, 1H), 4.08 (d, *J* = 16.0 Hz, 1H), 4.08-4.01 (m, 1H), 3.58 (dd, *J* = 13.6, 3.6 Hz, 1H), 3.45 (dd, *J* = 13.6, 5.6 Hz, 1H), 2.81 (d, *J* = 5.2 Hz, 1H), 2.72-2.65 (m, 1H), 2.59 (dd, *J* = 14.0, 6.4 Hz, 1H), 2.43 (s, 3H).

**<sup>13</sup>C NMR (100 MHz, CDCl<sub>3</sub>, δ ppm):** 143.8, 142.2, 139.6, 135.3, 130.8, 130.5, 129.8, 129.6, 129.3, 128.2, 127.0, 118.6, 112.4, 67.1, 56.8, 50.8, 34.8, 21.4.

**MS (EI)** *m/z* 368 (M<sup>+</sup>); **HRMS (ESI)** Calcd for C<sub>20</sub>H<sub>20</sub>N<sub>2</sub>O<sub>3</sub>S-H 367.1116, Found 367.1112.

6-(2-ethoxyphenyl)-1-tosyl-2,3,4,7-tetrahydro-1H-azepin-3-ol

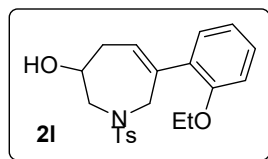

C<sub>21</sub>H<sub>25</sub>NO<sub>4</sub>S

MW: 387.49 g·mol<sup>-1</sup>

White Solid

Isolated Amount: 54.3 mg

Yield: 70%

**<sup>1</sup>H NMR (400 MHz, CDCl<sub>3</sub>, δ ppm):** 7.65 (d, *J* = 8.0 Hz, 2H), 7.27 (d, *J* = 8.0 Hz, 2H), 7.24-7.20 (m, 1H), 7.09 (dd, *J* = 7.6, 1.6 Hz, 1H), 6.89 (t, *J* = 7.6 Hz, 1H), 6.80 (d, *J* = 8.0 Hz, 1H), 5.66 (t, *J* = 6.8 Hz, 1H), 4.39 (d, *J* = 16.0 Hz, 1H), 4.13-4.05 (m, 1H), 4.01-3.95 (m, 3H), 3.60 (dd, *J* = 14.0, 4.0 Hz, 1H), 3.53 (dd, *J* = 14.0, 4.0 Hz, 1H), 2.72-2.53 (m, 3H), 2.41 (s, 3H), 1.28 (t, *J* = 7.2 Hz, 3H).

**<sup>13</sup>C NMR (100 MHz, CDCl<sub>3</sub>, δ ppm):** 155.5, 143.3, 139.8, 135.8, 131.0, 129.8, 129.6, 128.8, 127.0, 125.9, 120.6, 111.2, 68.7, 63.4, 55.2, 52.0, 33.7, 21.5, 14.7.

**MS (EI)** *m/z* 387 (M<sup>+</sup>); **HRMS (ESI)** Calcd for C<sub>21</sub>H<sub>25</sub>NO<sub>4</sub>S-H 386.1426, Found 386.1422.

6-(benzo[d][1,3]dioxol-5-yl)-1-tosyl-2,3,4,7-tetrahydro-1H-azepin-3-ol

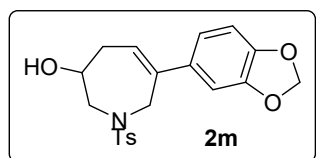

C<sub>20</sub>H<sub>21</sub>NO<sub>5</sub>S

MW: 387.45 g·mol<sup>-1</sup>

White Solid

Isolated Amount: 52.5 mg

Yield: 68%

**<sup>1</sup>H NMR (400 MHz, CDCl<sub>3</sub>, δ ppm):** 7.70 (d, *J* = 8.0 Hz, 2H), 7.31 (d, *J* = 8.4 Hz, 2H), 6.96-6.89 (m, 2H), 6.77 (d, *J* = 8.0 Hz, 1H), 5.96 (s, 2H), 5.85 (t, *J* = 6.8 Hz, 1H), 4.38 (d, *J* = 15.6 Hz, 1H), 4.07-3.99 (m, 1H), 3.95 (d, *J* = 16.0 Hz, 1H), 3.53 (dd, *J* = 13.6, 5.2 Hz, 1H), 3.42 (dd, *J* = 14.0, 4.0 Hz, 1H), 2.71-2.63 (m, 1H), 2.52 (ddd, *J* = 14.8, 6.8, 2.8 Hz, 1H), 2.43 (s, 3H), 2.39-2.24 (m, 1H).

**<sup>13</sup>C NMR (100 MHz, CDCl<sub>3</sub>, δ ppm):** 147.5, 147.2, 143.4, 141.9, 135.8, 132.0, 129.5, 127.0, 120.0, 115.4, 107.9, 106.7, 100.9, 52.4, 49.8, 49.4, 45.7, 21.3.

**MS (EI)** *m/z* 387 (M<sup>+</sup>); **HRMS (ESI)** Calcd for C<sub>20</sub>H<sub>21</sub>NO<sub>5</sub>S-H 386.1062, Found 386.1062.

6-(naphthalen-2-yl)-1-tosyl-2,3,4,7-tetrahydro-1H-azepin-3-ol

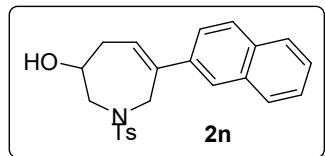

C<sub>23</sub>H<sub>23</sub>NO<sub>3</sub>S

MW: 393.50 g·mol<sup>-1</sup>

Light Yellow Oil

Isolated Amount: 61.9 mg

Yield: 79%

**<sup>1</sup>H NMR (400 MHz, CDCl<sub>3</sub>, δ ppm):** 7.84-7.78 (m, 4H), 7.71 (d, *J* = 8.4 Hz, 2H), 7.54 (dd, *J* = 8.4, 1.2 Hz, 1H), 7.49-7.43 (m, 2H), 7.28 (d, *J* = 8.0 Hz, 2H), 6.07 (t, *J* = 6.8 Hz, 1H), 4.52 (d, *J* = 16.0 Hz, 1H), 4.14 (d, *J* = 15.2 Hz, 1H), 4.09-4.03 (m, 1H), 3.58-3.49 (m, 2H), 2.77-2.69 (m, 1H), 2.62-2.50 (m, 2H), 2.40 (s, 3H).

**<sup>13</sup>C NMR (100 MHz, CDCl<sub>3</sub>, δ ppm):** 143.6, 140.9, 138.2, 135.5, 133.2, 132.6, 129.8, 128.1, 128.1, 127.5, 127.1, 126.2, 126.0, 125.8, 124.8, 124.5, 67.7, 56.7, 51.6, 34.6, 21.5.

**MS (EI)** *m/z* 393 (M<sup>+</sup>); **HRMS (ESI)** Calcd for C<sub>23</sub>H<sub>23</sub>NO<sub>3</sub>S-H 392.1320, Found 392.1325.

.....  
**3-methyl-6-phenyl-1-tosyl-2,3,4,7-tetrahydro-1*H*-azepin-3-ol**

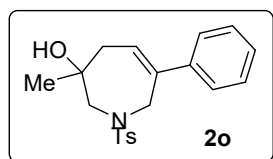

C<sub>20</sub>H<sub>23</sub>NO<sub>3</sub>S

MW: 357.47 g·mol<sup>-1</sup>

White Solid

Isolated Amount: 49.2 mg

Yield: 69%

**<sup>1</sup>H NMR (400 MHz, CDCl<sub>3</sub>, δ ppm):** 7.71 (d, *J* = 8.0 Hz, 2H), 7.41 (d, *J* = 7.6 Hz, 2H), 7.35-7.28 (m, 5H), 5.97 (t, *J* = 6.8 Hz, 1H), 4.63 (d, *J* = 15.6 Hz, 1H), 3.82 (d, *J* = 15.6 Hz, 1H), 3.54 (d, *J* = 13.6 Hz, 1H), 3.05 (d, *J* = 13.6 Hz, 1H), 2.83 (s, 1H), 2.74 (dd, *J* = 14.4, 7.2 Hz, 1H), 2.43-2.37 (m, 4H), 1.29 (s, 3H).

**<sup>13</sup>C NMR (100 MHz, CDCl<sub>3</sub>, δ ppm):** 143.7, 140.8, 140.2, 135.1, 129.9, 128.5, 127.6, 127.1, 126.1, 125.9, 71.4, 61.2, 52.2, 40.0, 26.3, 21.5.

**MS (EI)** *m/z* 357 (M<sup>+</sup>); **HRMS (ESI)** Calcd for C<sub>20</sub>H<sub>23</sub>NO<sub>3</sub>S-H 356.1320, Found 356.1319.

.....  
**6-(3-methoxyphenyl)-3-methyl-1-tosyl-2,3,4,7-tetrahydro-1*H*-azepin-3-ol**

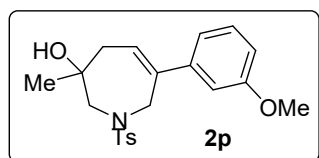

C<sub>21</sub>H<sub>25</sub>NO<sub>4</sub>S

MW: 387.49 g·mol<sup>-1</sup>

White Solid

Isolated Amount: 42.7 mg

Yield: 55%

**<sup>1</sup>H NMR (600 MHz, CDCl<sub>3</sub>, δ ppm):** 7.70 (d, *J* = 8.4 Hz, 2H), 7.31 (d, *J* = 8.4 Hz, 2H), 7.24 (t, *J* = 8.4 Hz, 1H), 7.02-7.01 (m, 1H), 6.98 (d, *J* = 8.4 Hz, 1H), 6.83 (dd, *J* = 8.4, 2.4 Hz, 1H), 5.97 (t, *J* = 6.6 Hz, 1H), 4.59 (d, *J* = 15.6 Hz, 1H), 3.83 (s, 3H), 3.81 (d, *J* = 15.6 Hz, 1H), 3.53 (d, *J* = 13.8 Hz, 1H), 3.04 (d, *J* = 13.2 Hz, 1H), 2.81 (s, 1H), 2.71 (dd, *J* = 14.4, 7.2 Hz, 1H), 2.42 (s, 3H), 2.39 (dd, *J* = 14.4, 6.6 Hz, 1H), 1.28 (s, 3H).

**<sup>13</sup>C NMR (100 MHz, CDCl<sub>3</sub>, δ ppm):** 159.6, 143.7, 142.3, 140.3, 135.1, 129.9, 129.5, 127.1, 126.1, 118.5, 113.3, 111.7, 71.2, 61.4, 55.3, 52.2, 40.0, 26.4, 21.5.

**MS (EI)** *m/z* 387 (M<sup>+</sup>); **HRMS (ESI)** Calcd for C<sub>21</sub>H<sub>25</sub>NO<sub>4</sub>S-H 386.1426, Found 386.1424.

.....  
**6-(3-(benzyloxy)phenyl)-3-methyl-1-tosyl-2,3,4,7-tetrahydro-1*H*-azepin-3-ol**

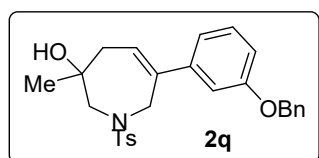

C<sub>27</sub>H<sub>29</sub>NO<sub>4</sub>S

MW: 463.59 g·mol<sup>-1</sup>

Light Yellow Oil

Isolated Amount: 52.7 mg

Yield: 57%

**<sup>1</sup>H NMR (400 MHz, CDCl<sub>3</sub>, δ ppm):** 7.69 (d, *J* = 8.0 Hz, 2H), 7.45 (d, *J* = 7.6 Hz, 2H), 7.39 (t, *J* = 7.2 Hz, 2H), 7.35-7.31 (m, 3H), 7.26-7.22 (m, 1H), 7.09 (s, 1H), 7.00 (d, *J* = 8.0 Hz, 1H), 6.90 (d, *J* = 8.0 Hz, 1H), 5.97 (t, *J* = 6.4 Hz, 1H), 5.09 (s, 2H), 4.61 (d, *J* = 15.6 Hz, 1H), 3.78 (d, *J* = 16.0 Hz, 1H), 3.54 (d, *J* = 13.6 Hz, 1H), 3.03 (d, *J* = 13.6 Hz, 1H), 2.82 (s, 1H), 2.73 (dd, *J* = 14.4, 6.8 Hz, 1H), 2.43-2.36 (m, 4H), 1.28 (s, 3H).

**<sup>13</sup>C NMR (100 MHz, CDCl<sub>3</sub>, δ ppm):** 158.8, 143.7, 142.3, 140.2, 136.9, 135.1, 129.9, 129.5, 128.5, 127.9, 127.6, 127.1, 126.1, 118.8, 114.1, 112.7, 71.3, 69.9, 61.3, 52.2, 40.0, 26.4, 21.5.

**MS (EI)** *m/z* 463 (M<sup>+</sup>); **HRMS (ESI)** Calcd for C<sub>27</sub>H<sub>29</sub>NO<sub>4</sub>S-H 462.1739, Found 462.1742.

6-(4-fluorophenyl)-3-methyl-1-tosyl-2,3,4,7-tetrahydro-1*H*-azepin-3-ol

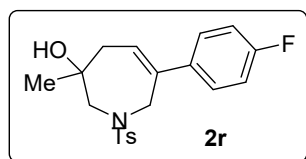

C<sub>20</sub>H<sub>22</sub>FNO<sub>3</sub>S

MW: 375.46 g·mol<sup>-1</sup>

White Solid

Isolated Amount: 50.8 mg

Yield: 68%

**<sup>1</sup>H NMR (400 MHz, CDCl<sub>3</sub>, δ ppm):** 7.70 (d, *J* = 8.0 Hz, 2H), 7.42-7.38 (m, 2H), 7.33 (d, *J* = 8.0 Hz, 2H), 7.02 (t, *J* = 8.8 Hz, 2H), 5.92 (t, *J* = 6.8 Hz, 1H), 4.57 (d, *J* = 16.0 Hz, 1H), 3.79 (d, *J* = 16.0 Hz, 1H), 3.54 (d, *J* = 13.6 Hz, 1H), 3.04 (d, *J* = 13.6 Hz, 1H), 2.77 (s, 1H), 2.70 (dd, *J* = 14.8, 7.2 Hz, 1H), 2.43-2.37 (m, 4H), 1.29 (s, 3H).

**<sup>13</sup>C NMR (100 MHz, CDCl<sub>3</sub>, δ ppm):** 162.3 (d, *J* = 245.4 Hz), 143.8, 139.7, 136.9 (d, *J* = 3.2 Hz), 135.2, 129.9, 127.9 (d, *J* = 7.9 Hz), 127.1, 126.0, 115.3 (d, *J* = 21.4 Hz), 71.0, 61.5, 52.1, 40.1, 26.5, 21.5.

**<sup>19</sup>F NMR (376 MHz, CDCl<sub>3</sub>, δ ppm):** -114.6.

**MS (EI)** *m/z* 375 (M<sup>+</sup>); **HRMS (ESI)** Calcd for C<sub>20</sub>H<sub>22</sub>FNO<sub>3</sub>S-H 374.1226, Found 374.1227.

6-(4-chlorophenyl)-3-methyl-1-tosyl-2,3,4,7-tetrahydro-1*H*-azepin-3-ol

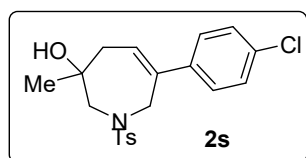

C<sub>20</sub>H<sub>22</sub>ClNO<sub>3</sub>S

MW: 391.91 g·mol<sup>-1</sup>

White Solid

Isolated Amount: 49.1 mg

Yield: 63%

**<sup>1</sup>H NMR (400 MHz, CDCl<sub>3</sub>, δ ppm):** 7.70 (d, *J* = 8.0 Hz, 2H), 7.37-7.29 (m, 6H), 5.96 (t, *J* = 6.8 Hz, 1H), 4.56 (d, *J* = 15.6 Hz, 1H), 3.79 (d, *J* = 16.0 Hz, 1H), 3.54 (d, *J* = 14.0 Hz, 1H), 3.04 (d, *J* = 13.6 Hz, 1H), 2.74-2.68 (m, 2H), 2.43-2.37 (m, 4H), 1.29 (s, 3H).

**<sup>13</sup>C NMR (100 MHz, CDCl<sub>3</sub>, δ ppm):** 143.8, 139.6, 139.2, 135.2, 133.5, 129.9, 128.6, 127.5, 127.1, 126.6, 71.0, 61.4, 51.9, 40.1, 26.5, 21.5.

**MS (EI)** *m/z* 391 (M<sup>+</sup>); **HRMS (ESI)** Calcd for C<sub>20</sub>H<sub>22</sub>ClNO<sub>3</sub>S-H 390.0931, Found 390.0935.

3-(6-hydroxy-6-methyl-1-tosyl-2,5,6,7-tetrahydro-1*H*-azepin-3-yl)benzonitrile

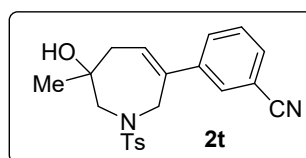

C<sub>21</sub>H<sub>22</sub>N<sub>2</sub>O<sub>3</sub>S

MW: 382.48 g·mol<sup>-1</sup>

Light Yellow Oil

Isolated Amount: 35.8 mg

Yield: 47%

**<sup>1</sup>H NMR (400 MHz, CDCl<sub>3</sub>, δ ppm):** 7.74 (d, *J* = 7.6 Hz, 1H), 7.71 (d, *J* = 7.6 Hz, 2H), 7.65 (s, 1H), 7.56 (d, *J* = 8.0 Hz, 1H), 7.48-7.44 (m, 1H), 7.34 (d, *J* = 8.0 Hz, 2H), 6.03 (t, *J* = 6.8 Hz, 1H), 4.51 (d, *J* = 15.6 Hz, 1H), 3.85 (d, *J* = 16.0 Hz, 1H), 3.54 (d, *J* = 13.6 Hz, 1H), 3.10 (d, *J* = 14.0 Hz, 1H), 2.79 (s, 1H), 2.73 (dd, *J* = 14.4, 7.2 Hz, 1H), 2.47-2.42 (m, 4H), 1.30 (s, 3H).

**<sup>13</sup>C NMR (100 MHz, CDCl<sub>3</sub>, δ ppm):** 143.9, 142.0, 139.0, 135.0, 131.0, 130.6, 130.0, 129.7, 129.4, 128.3, 127.1, 118.6, 112.6, 70.8, 61.5, 51.5, 40.2, 26.6, 21.5.

**MS (EI)** *m/z* 382 (M<sup>+</sup>); **HRMS (ESI)** Calcd for C<sub>21</sub>H<sub>22</sub>N<sub>2</sub>O<sub>3</sub>S-H 381.1273, Found 381.1273.



### 1-(methylsulfonyl)-6-phenyl-2,3,4,7-tetrahydro-1H-azepin-3-ol

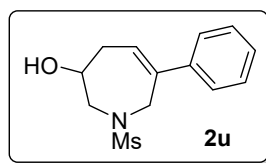

$C_{13}H_{17}NO_3S$

MW: 267.34 g·mol<sup>-1</sup>

White Solid

Isolated Amount: 42.2 mg

Yield: 79%

**<sup>1</sup>H NMR (400 MHz, CDCl<sub>3</sub>, δ ppm):** 7.44 (d, *J* = 7.2 Hz, 2H), 7.36-7.26 (m, 3H), 6.05 (t, *J* = 6.8 Hz, 1H), 4.52 (d, *J* = 16.4 Hz, 1H), 4.21 (d, *J* = 16.4 Hz, 1H), 4.12-4.04 (m, 1H), 3.75-3.65 (m, 2H), 2.91 (s, 3H), 2.79-2.71 (m, 1H), 2.66 (ddd, *J* = 15.2, 6.8, 3.2 Hz, 1H), 2.36 (d, *J* = 6.4 Hz, 1H).

**<sup>13</sup>C NMR (100 MHz, CDCl<sub>3</sub>, δ ppm):** 141.7, 140.6, 128.6, 127.7, 126.0, 125.4, 67.4, 56.6, 50.7, 38.6, 34.7.

**MS (EI)** *m/z* 267 (M<sup>+</sup>); **HRMS (ESI)** Calcd for C<sub>13</sub>H<sub>17</sub>NO<sub>3</sub>S-H 266.0851, Found 266.0851.

### 6-phenyl-1-(phenylsulfonyl)-2,3,4,7-tetrahydro-1H-azepin-3-ol

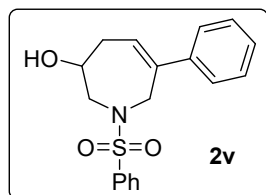

$C_{18}H_{19}NO_3S$

MW: 329.41 g·mol<sup>-1</sup>

White Solid

Isolated Amount: 52.9 mg

Yield: 80%

**<sup>1</sup>H NMR (600 MHz, CDCl<sub>3</sub>, δ ppm):** 7.83-7.81 (m, 2H), 7.60-7.58 (m, 1H), 7.53-7.50 (m, 2H), 7.42-7.40 (m, 2H), 7.35-7.32 (m, 2H), 7.29-7.27 (m, 1H), 5.94 (t, *J* = 6.6 Hz, 1H), 4.46 (d, *J* = 15.6 Hz, 1H), 4.07-4.04 (m, 2H), 3.55 (dd, *J* = 13.8, 4.8 Hz, 1H), 3.50 (dd, *J* = 13.8, 4.2 Hz, 1H), 2.72-2.67 (m, 1H), 2.56 (ddd, *J* = 15.0, 6.6, 3.0 Hz, 1H), 2.40 (d, *J* = 8.4 Hz, 1H).

**<sup>13</sup>C NMR (100 MHz, CDCl<sub>3</sub>, δ ppm):** 141.0, 141.0, 138.6, 132.8, 129.2, 128.5, 127.6, 127.1, 126.2, 125.2, 67.8, 56.6, 51.7, 34.5.

**MS (EI)** *m/z* 329 (M<sup>+</sup>); **HRMS (ESI)** Calcd for C<sub>18</sub>H<sub>19</sub>NO<sub>3</sub>S-H 328.1007, Found 328.1005.

### 1-((4-fluorophenyl)sulfonyl)-6-phenyl-2,3,4,7-tetrahydro-1H-azepin-3-ol

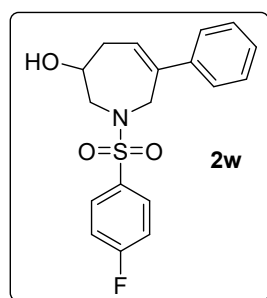

$C_{18}H_{18}FNO_3S$

MW: 347.40 g·mol<sup>-1</sup>

White Solid

Isolated Amount: 52.2mg

Yield: 75%

**<sup>1</sup>H NMR (400 MHz, CDCl<sub>3</sub>, δ ppm):** 7.83-7.80 (m, 2H), 7.39 (d, *J* = 7.6 Hz, 2H), 7.35-7.26 (m, 3H), 7.17 (t, *J* = 8.0 Hz, 2H), 5.93 (t, *J* = 6.4 Hz, 1H), 4.39 (d, *J* = 16.0 Hz, 1H), 4.09 (d, *J* = 16.0 Hz, 1H), 4.07-3.99 (m, 1H), 3.57-3.47 (m, 2H), 2.69-2.62 (m, 1H), 2.58-2.51 (m, 2H).

**<sup>13</sup>C NMR (100 MHz, CDCl<sub>3</sub>, δ ppm):** 165.0 (d, *J* = 253.3 Hz), 140.9, 140.8, 134.7 (d, *J* = 3.4 Hz), 129.7 (d, *J* = 9.3 Hz), 128.5, 127.6, 126.0, 125.3, 116.4 (d, *J* = 22.5 Hz), 67.6, 56.6, 51.4, 34.5.

<sup>19</sup>F NMR (376 MHz, CDCl<sub>3</sub>, δ ppm): -104.9.

MS (EI) m/z 347 (M<sup>+</sup>); HRMS (ESI) Calcd for C<sub>18</sub>H<sub>18</sub>FNO<sub>3</sub>S-H 346.0913, Found 346.0916.

6-(thiophen-2-yl)-1-tosyl-2,3,4,7-tetrahydro-1*H*-azepin-3-ol

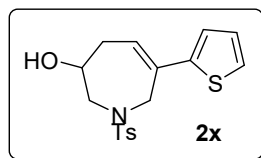

C<sub>17</sub>H<sub>19</sub>NO<sub>3</sub>S<sub>2</sub>

MW: 349.46 g·mol<sup>-1</sup>

White Solid

Isolated Amount: 56.5 mg

Yield: 81%

<sup>1</sup>H NMR (400 MHz, CDCl<sub>3</sub>, δ ppm): 7.71 (d, *J* = 8.0 Hz, 2H), 7.31 (d, *J* = 8.0 Hz, 2H), 7.16 (d, *J* = 5.2 Hz, 1H), 7.13 (d, *J* = 3.6 Hz, 1H), 7.00-6.98 (m, 1H), 6.10 (t, *J* = 6.8 Hz, 1H), 4.50 (d, *J* = 16.0 Hz, 1H), 4.06 (d, *J* = 16.0 Hz, 1H), 4.03-3.97 (m, 1H), 3.55 (dd, *J* = 14.0, 4.8 Hz, 1H), 3.45 (dd, *J* = 14.0, 3.6 Hz, 1H), 2.73-2.66 (m, 1H), 2.54 (ddd, *J* = 14.8, 7.2, 3.2 Hz, 1H), 2.43 (s, 3H), 2.29 (d, *J* = 8.8 Hz, 1H).

<sup>13</sup>C NMR (100 MHz, CDCl<sub>3</sub>, δ ppm): 143.7, 143.6, 135.8, 134.7, 129.9, 127.6, 127.1, 124.4, 123.5, 123.4, 67.8, 56.5, 51.1, 34.2, 21.5.

MS (EI) m/z 349 (M<sup>+</sup>); HRMS (ESI) Calcd for C<sub>17</sub>H<sub>19</sub>NO<sub>3</sub>S<sub>2</sub>-H 348.0728, Found 348.0715.

ethyl 6-hydroxy-1-tosyl-2,5,6,7-tetrahydro-1*H*-azepine-3-carboxylate

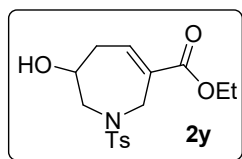

C<sub>16</sub>H<sub>21</sub>NO<sub>5</sub>S

MW: 339.41 g·mol<sup>-1</sup>

Light Yellow Oil

Isolated Amount: 23.6 mg

Yield: 35%

<sup>1</sup>H NMR (400 MHz, CDCl<sub>3</sub>, δ ppm): 7.70 (d, *J* = 8.0 Hz, 2H), 7.31 (d, *J* = 8.0 Hz, 2H), 7.01 (t, *J* = 6.8 Hz, 1H), 4.35 (d, *J* = 16.8 Hz, 1H), 4.19 (q, *J* = 7.2 Hz, 2H), 4.11-4.04 (m, 1H), 4.01 (d, *J* = 16.8 Hz, 1H), 3.47 (d, *J* = 4.4 Hz, 2H), 2.78-2.70 (m, 1H), 2.64-2.58 (m, 1H), 2.56-2.45 (m, 1H), 2.43 (s, 3H), 1.29 (t, *J* = 6.8 Hz, 3H).

<sup>13</sup>C NMR (100 MHz, CDCl<sub>3</sub>, δ ppm): 165.5, 143.7, 138.9, 135.6, 132.4, 129.8, 127.1, 67.9, 61.1, 55.7, 47.9, 34.1, 21.5, 14.2.

MS (EI) m/z 339 (M<sup>+</sup>); HRMS (ESI) Calcd for C<sub>16</sub>H<sub>21</sub>NO<sub>5</sub>S-H 338.1062, Found 338.1061.

6-phenyl-2,3,4,5-tetrahydrooxepin-3-ol

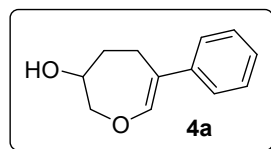

C<sub>12</sub>H<sub>14</sub>O<sub>2</sub>

MW: 190.24 g·mol<sup>-1</sup>

Off-White Solid

Isolated Amount: 26.3 mg

Yield: 69%

<sup>1</sup>H NMR (400 MHz, CDCl<sub>3</sub>, δ ppm): 7.32-7.20 (m, 5H), 6.69 (s, 1H), 4.15-4.09 (m, 2H), 3.98 (dd, *J* = 11.6, 4.0 Hz, 1H), 2.74 (dd, *J* = 16.8, 9.6 Hz, 1H), 2.52 (dd, *J* = 16.4, 10.0 Hz, 1H), 2.18-2.10 (m, 2H), 1.99-1.91 (m, 1H).

<sup>13</sup>C NMR (100 MHz, CDCl<sub>3</sub>, δ ppm): 147.5, 140.7, 128.3, 126.6, 126.2, 126.1, 76.3, 70.8, 33.4, 25.4.

MS (EI) m/z 190 (M<sup>+</sup>); HRMS (ESI) Calcd for C<sub>12</sub>H<sub>14</sub>O<sub>2</sub>-H 189.0916, Found 189.0919.

### 6-(3-methoxyphenyl)-2,3,4,5-tetrahydrooxepin-3-ol

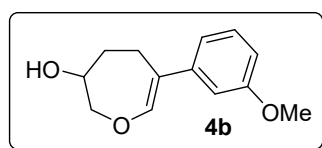

$C_{13}H_{16}O_3$

MW: 220.27 g·mol<sup>-1</sup>

Off-White Solid

Isolated Amount: 27.2 mg

Yield: 62%

**<sup>1</sup>H NMR (600 MHz, CDCl<sub>3</sub>, δ ppm):** 7.22 (t, *J* = 7.8 Hz, 1H), 6.85 (d, *J* = 7.8 Hz, 1H), 6.79-6.77 (m, 2H), 6.70 (s, 1H), 4.14-4.07 (m, 2H), 3.98 (dd, *J* = 12.0, 4.2 Hz, 1H), 3.81 (s, 3H), 2.72 (dd, *J* = 16.2, 9.0 Hz, 1H), 2.51 (dd, *J* = 16.2, 9.6 Hz, 1H), 2.17-2.12 (m, 1H), 1.98-1.92 (m, 2H).

**<sup>13</sup>C NMR (100 MHz, CDCl<sub>3</sub>, δ ppm):** 159.5, 147.6, 142.3, 129.3, 126.0, 118.7, 112.1, 111.8, 76.3, 70.9, 55.2, 33.4, 25.5.

**MS (EI)** *m/z* 220 (M<sup>+</sup>); **HRMS (ESI)** Calcd for C<sub>13</sub>H<sub>16</sub>O<sub>3</sub>-H 219.1021, Found 219.1021.

### 6-(3-(benzyloxy)phenyl)-2,3,4,5-tetrahydrooxepin-3-ol

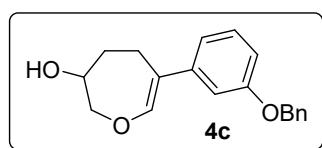

$C_{19}H_{20}O_3$

MW: 296.37 g·mol<sup>-1</sup>

Light Yellow Oil

Isolated Amount: 31.3 mg

Yield: 53%

**<sup>1</sup>H NMR (400 MHz, CDCl<sub>3</sub>, δ ppm):** 7.45-7.33 (m, 5H), 7.21 (t, *J* = 8.0 Hz, 1H), 6.88-6.83 (m, 3H), 6.70 (s, 1H), 5.06 (s, 2H), 4.14-4.06 (m, 2H), 3.98 (dd, *J* = 11.6, 4.0 Hz, 1H), 2.71 (dd, *J* = 16.4, 9.2 Hz, 1H), 2.49 (dd, *J* = 16.4, 9.6 Hz, 1H), 2.17-2.09 (m, 1H), 1.98-1.90 (m, 2H).

**<sup>13</sup>C NMR (100 MHz, CDCl<sub>3</sub>, δ ppm):** 158.7, 147.6, 142.3, 136.9, 129.3, 128.6, 128.0, 127.5, 126.0, 118.9, 113.1, 112.6, 76.3, 70.8, 70.0, 33.4, 25.4.

**MS (EI)** *m/z* 296 (M<sup>+</sup>); **HRMS (ESI)** Calcd for C<sub>19</sub>H<sub>20</sub>O<sub>3</sub>-H 295.1334, Found 295.1336.

### 6-(4-fluorophenyl)-2,3,4,5-tetrahydrooxepin-3-ol

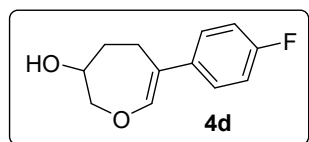

$C_{12}H_{13}FO_2$

MW: 208.23 g·mol<sup>-1</sup>

White Solid

Isolated Amount: 28.2 mg

Yield: 68%

**<sup>1</sup>H NMR (400 MHz, CDCl<sub>3</sub>, δ ppm):** 7.23-7.19 (m, 2H), 7.01-6.96 (m, 2H), 6.63 (s, 1H), 4.14-4.07 (m, 2H), 3.98 (dd, *J* = 12.4, 4.8 Hz, 1H), 2.70 (dd, *J* = 16.4, 9.2 Hz, 1H), 2.48 (dd, *J* = 15.6, 9.6 Hz, 1H), 2.18-2.10 (m, 1H), 1.99-1.91 (m, 2H).

**<sup>13</sup>C NMR (100 MHz, CDCl<sub>3</sub>, δ ppm):** 161.8 (d, *J* = 243.8 Hz), 147.4, 136.7 (d, *J* = 3.3 Hz), 127.7 (d, *J* = 7.8 Hz), 125.3, 115.1 (d, *J* = 21.2 Hz), 76.3, 70.8, 33.4, 25.7.

**<sup>19</sup>F NMR (376 MHz, CDCl<sub>3</sub>, δ ppm):** -116.4.

**MS (EI)** *m/z* 208 (M<sup>+</sup>); **HRMS (ESI)** Calcd for C<sub>12</sub>H<sub>13</sub>FO<sub>2</sub>-H 207.0821, Found 207.0825.

### 6-(4-chlorophenyl)-2,3,4,5-tetrahydrooxepin-3-ol

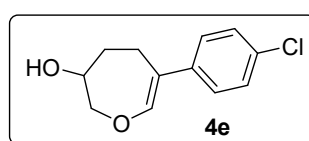

$C_{12}H_{13}ClO_2$

MW: 224.68 g·mol<sup>-1</sup>

Light Yellow Oil

Isolated Amount: 29.3 mg

Yield: 65%

**<sup>1</sup>H NMR (400 MHz, CDCl<sub>3</sub>, δ ppm):** 7.26 (d, *J* = 8.4 Hz, 2H), 7.18 (d, *J* = 8.4 Hz, 2H), 6.66 (s, 1H), 4.15-4.06 (m, 2H), 3.99 (dd, *J* = 12.0, 4.4 Hz, 1H), 2.69 (dd, *J* = 16.4, 9.2 Hz, 1H), 2.48 (dd,

$J = 16.0, 9.6$  Hz, 1H), 2.19-2.11 (m, 1H), 2.02-1.90 (m, 2H).

$^{13}\text{C}$  NMR (100 MHz,  $\text{CDCl}_3$ ,  $\delta$  ppm): 147.8, 139.2, 132.3, 128.4, 127.4, 124.9, 76.3, 70.8, 33.3, 25.4.

MS (EI)  $m/z$  224 (M<sup>+</sup>); HRMS (ESI) Calcd for  $\text{C}_{12}\text{H}_{13}\text{ClO}_2\text{-H}$  223.0526, Found 223.0527.

.....  
**3-(6-hydroxy-4,5,6,7-tetrahydrooxepin-3-yl)benzonitrile**

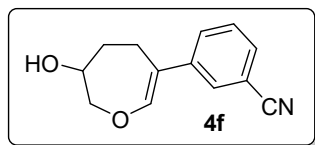

$\text{C}_{13}\text{H}_{13}\text{NO}_2$

MW: 215.25  $\text{g}\cdot\text{mol}^{-1}$

Light Yellow Solid

Isolated Amount: 25.4 mg

Yield: 59%

$^1\text{H}$  NMR (400 MHz,  $\text{CDCl}_3$ ,  $\delta$  ppm): 7.53 (s, 1H), 7.51-7.48 (m, 2H), 7.41-7.38 (m, 1H), 6.70 (s, 1H), 4.20-4.11 (m, 2H), 4.02 (dd,  $J = 11.6, 4.0$  Hz, 1H), 2.70 (dd,  $J = 16.4, 9.2$  Hz, 1H), 2.51 (dd,  $J = 16.4, 10.0$  Hz, 1H), 2.23-1.94 (m, 3H).

$^{13}\text{C}$  NMR (100 MHz,  $\text{CDCl}_3$ ,  $\delta$  ppm): 148.9, 142.1, 130.4, 129.9, 129.6, 129.1, 123.6, 118.8, 112.4, 76.4, 70.5, 33.3, 25.3.

MS (EI)  $m/z$  215 (M<sup>+</sup>); HRMS (ESI) Calcd for  $\text{C}_{13}\text{H}_{13}\text{NO}_2\text{-H}$  214.0868, Found 214.0867.

.....  
**4-(6-hydroxy-4,5,6,7-tetrahydrooxepin-3-yl)benzonitrile**

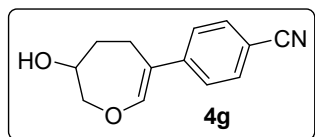

$\text{C}_{13}\text{H}_{13}\text{NO}_2$

MW: 215.25  $\text{g}\cdot\text{mol}^{-1}$

Light Yellow Oil

Isolated Amount: 22.3 mg

Yield: 52%

$^1\text{H}$  NMR (400 MHz,  $\text{CDCl}_3$ ,  $\delta$  ppm): 7.57 (d,  $J = 7.6$  Hz, 2H), 7.34 (d,  $J = 8.0$  Hz, 2H), 6.77 (s, 1H), 4.22-4.11 (m, 2H), 4.03 (dd,  $J = 12.0, 4.4$  Hz, 1H), 2.71 (dd,  $J = 16.4, 9.2$  Hz, 1H), 2.52 (dd,  $J = 16.4, 10.0$  Hz, 1H), 2.24-1.94 (m, 3H).

$^{13}\text{C}$  NMR (100 MHz,  $\text{CDCl}_3$ ,  $\delta$  ppm): 149.6, 145.7, 132.1, 126.3, 123.8, 119.0, 109.7, 76.4, 70.5, 33.3, 25.0.

MS (EI)  $m/z$  215 (M<sup>+</sup>); HRMS (ESI) Calcd for  $\text{C}_{13}\text{H}_{13}\text{NO}_2\text{-H}$  214.0868, Found 214.0868.

.....  
**6-(naphthalen-2-yl)-2,3,4,5-tetrahydrooxepin-3-ol**

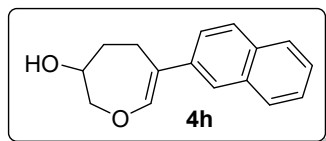

$\text{C}_{16}\text{H}_{16}\text{O}_2$

MW: 240.3  $\text{g}\cdot\text{mol}^{-1}$

Off-White Solid

Isolated Amount: 24.2 mg

Yield: 50%

$^1\text{H}$  NMR (400 MHz,  $\text{CDCl}_3$ ,  $\delta$  ppm): 7.81-7.76 (m, 3H), 7.69 (s, 1H), 7.49-7.41 (m, 3H), 6.83 (s, 1H), 4.20-4.10 (m, 2H), 4.04 (dd,  $J = 11.6, 4.0$  Hz, 1H), 2.85 (dd,  $J = 16.4, 9.2$  Hz, 1H), 2.63 (dd,  $J = 16.4, 10.0$  Hz, 1H), 2.26-2.16 (m, 1H), 2.06-1.98 (m, 2H).

$^{13}\text{C}$  NMR (100 MHz,  $\text{CDCl}_3$ ,  $\delta$  ppm): 148.0, 138.0, 133.4, 132.2, 127.9, 127.7, 127.5, 126.2, 126.0, 125.5, 124.7, 124.3, 76.4, 70.9, 33.4, 25.4.

MS (EI)  $m/z$  240 (M<sup>+</sup>); HRMS (ESI) Calcd for  $\text{C}_{16}\text{H}_{16}\text{O}_2\text{-H}$  239.1072, Found 239.1077.

### 6-(thiophen-2-yl)-2,3,4,5-tetrahydrooxepin-3-ol

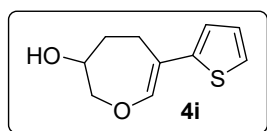

C<sub>10</sub>H<sub>12</sub>O<sub>2</sub>S

MW: 196.26 g·mol<sup>-1</sup>

Light Yellow Oil

Isolated Amount: 21.1 mg

Yield: 54%

**<sup>1</sup>H NMR (400 MHz, CDCl<sub>3</sub>, δ ppm):** 7.08 (d, *J* = 5.2 Hz, 1H), 6.96-6.94 (m, 2H), 6.90 (d, *J* = 3.6 Hz, 1H), 4.15 (dd, *J* = 12.4, 3.2 Hz, 1H), 4.13-4.07 (m, 1H), 4.02 (dd, *J* = 12.0, 4.0 Hz, 1H), 2.75 (dd, *J* = 16.8, 9.2 Hz, 1H), 2.54 (dd, *J* = 16.4, 10.0 Hz, 1H), 2.23-2.15 (m, 1H), 2.02-1.94 (m, 1H), 1.90 (d, *J* = 5.6 Hz, 1H).

**<sup>13</sup>C NMR (100 MHz, CDCl<sub>3</sub>, δ ppm):** 146.8, 143.6, 127.2, 122.6, 122.0, 119.5, 76.8, 70.6, 33.1, 25.8.

**MS (EI)** *m/z* 196 (M<sup>+</sup>); **HRMS (ESI)** Calcd for C<sub>10</sub>H<sub>12</sub>O<sub>2</sub>S-H 195.0480, Found 195.0477.

### 6-(thiophen-2-yl)-2,3,4,7-tetrahydrooxepin-3-ol

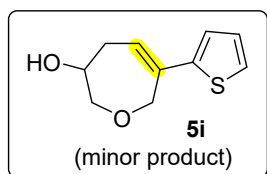

C<sub>10</sub>H<sub>12</sub>O<sub>2</sub>S

MW: 196.26 g·mol<sup>-1</sup>

Light Yellow Oil

Isolated Amount: < 3.8 mg

Yield: < 10%

**<sup>1</sup>H NMR (400 MHz, CDCl<sub>3</sub>, δ ppm):** 7.15 (d, *J* = 4.8 Hz, 1H), 6.98-6.96 (m, 1H), 6.93 (d, *J* = 3.6 Hz, 1H), 6.15 (t, *J* = 6.4 Hz, 1H), 4.68 (d, *J* = 15.2 Hz, 1H), 4.50 (d, *J* = 15.2 Hz, 1H), 4.03-3.97 (m, 1H), 3.94-3.93 (m, 2H), 2.78-2.71 (m, 1H), 2.64 (ddd, *J* = 15.6, 6.0, 2.0 Hz, 1H), 2.18 (d, *J* = 8.0 Hz, 1H).

**MS (EI)** *m/z* 196 (M<sup>+</sup>).

### 3-methyl-6-phenyl-2,3,4,5-tetrahydrooxepin-3-ol

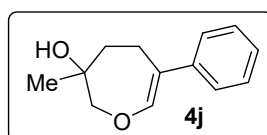

C<sub>13</sub>H<sub>16</sub>O<sub>2</sub>

MW: 204.27 g·mol<sup>-1</sup>

Light Yellow Oil

Isolated Amount: 22.3 mg

Yield: 55 %

**<sup>1</sup>H NMR (400 MHz, CDCl<sub>3</sub>, δ ppm):** 7.32-7.20 (m, 5H), 6.69 (s, 1H), 3.91 (d, *J* = 12.0 Hz, 1H), 3.80 (d, *J* = 12.0 Hz, 1H), 2.75 (dd, *J* = 16.4, 10.4 Hz, 1H), 2.47 (ddd, *J* = 16.4, 8.4, 1.6 Hz, 1H), 2.26 (s, 1H), 2.03-1.97 (m, 1H), 1.91-1.84 (m, 1H), 1.26 (s, 3H).

**<sup>13</sup>C NMR (100 MHz, CDCl<sub>3</sub>, δ ppm):** 147.3, 140.6, 128.3, 126.6, 126.5, 126.1, 80.1, 72.8, 39.2, 26.0, 25.3.

**MS (EI)** *m/z* 204 (M<sup>+</sup>); **HRMS (ESI)** Calcd for C<sub>13</sub>H<sub>16</sub>O<sub>2</sub>-H 203.1072, Found 203.1072.

#### 4. Table S1 for selected preliminary experimental conditions screening

Table S1 Selected preliminary experimental conditions screening

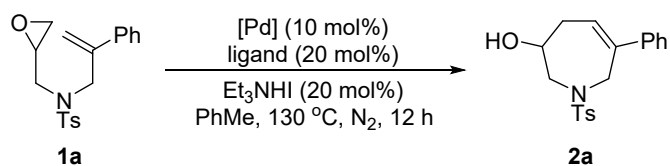

| Entry     | Cat. [Pd]                                          | Ligand                              | Additive                       | Yield of <b>2a</b> |
|-----------|----------------------------------------------------|-------------------------------------|--------------------------------|--------------------|
| 1         | Pd(PPh <sub>3</sub> ) <sub>4</sub>                 | -                                   | -                              | 13%                |
| 2         | Pd(dba) <sub>2</sub>                               | -                                   | -                              | 12%                |
| 3         | PdCl <sub>2</sub> (PPh <sub>3</sub> ) <sub>2</sub> | -                                   | -                              | trace              |
| 4         | PdCl <sub>2</sub> (dppf)                           | -                                   | -                              | 9%                 |
| 5         | Pd(PPh <sub>3</sub> ) <sub>4</sub>                 | tris(2,6-dimethoxyphenyl)phosphine  | -                              | ND                 |
| 6         | Pd(PPh <sub>3</sub> ) <sub>4</sub>                 | tri(2-furyl)phosphine               | -                              | 11%                |
| 7         | Pd(PPh <sub>3</sub> ) <sub>4</sub>                 | RuPhos                              | -                              | ND                 |
| 8         | Pd(PPh <sub>3</sub> ) <sub>4</sub>                 | 4,4'-dimethoxy-2,2'-bipyridine      | -                              | ND                 |
| 9         | Pd(PPh <sub>3</sub> ) <sub>4</sub>                 | Xantphos                            | -                              | 17%                |
| 10        | Pd(PPh <sub>3</sub> ) <sub>4</sub>                 | bis(2-diphenylphosphinophenyl)ether | -                              | ND                 |
| 11        | Pd(PPh <sub>3</sub> ) <sub>4</sub>                 | BINAP                               | -                              | 13%                |
| 12        | Pd(PPh <sub>3</sub> ) <sub>4</sub>                 | dppm                                | -                              | trace              |
| 13        | Pd(PPh <sub>3</sub> ) <sub>4</sub>                 | dppp                                | -                              | 9%                 |
| <b>14</b> | <b>Pd(PPh<sub>3</sub>)<sub>4</sub></b>             | <b>dppf</b>                         | -                              | <b>41%</b>         |
| 15        | Pd(PPh <sub>3</sub> ) <sub>4</sub>                 | dppf                                | Et <sub>3</sub> N (20 mol%)    | 28%                |
| 16        | Pd(PPh <sub>3</sub> ) <sub>4</sub>                 | dppf                                | Cy <sub>2</sub> NMe (20 mol%)  | 25%                |
| 17        | Pd(PPh <sub>3</sub> ) <sub>4</sub>                 | dppf                                | Cu(OAc) <sub>2</sub> (10 mol%) | 8%                 |
| 18        | Pd(PPh <sub>3</sub> ) <sub>4</sub>                 | dppf                                | H <sub>2</sub> O (1.0 equiv)   | 16%                |
| 19        | Pd(PPh <sub>3</sub> ) <sub>4</sub>                 | dppf                                | MeOH (1.0 equiv)               | 13%                |

## 5. CAS number of ligands L1-L6

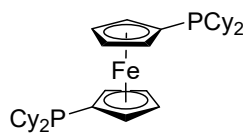

**L1**

CAS No. 146960-90-9  
consumption of **1a**: 100%  
yield of **2a**: 14%

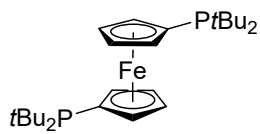

**L2**

CAS No. 84680-95-5  
consumption of **1a**: 100%  
yield of **2a**: 8%

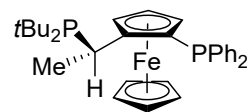

**L3**

CAS No. 277306-29-3  
consumption of **1a**: 100%  
yield of **2a**: 80%

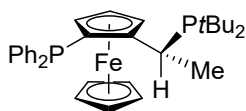

**L4**

CAS No. 155830-69-6  
consumption of **1a**: 100%  
yield of **2a**: 86%

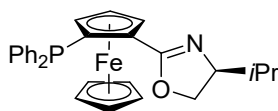

**L5**

CAS No. 163169-29-7  
consumption of **1a**: 20%  
yield of **2a**: ND

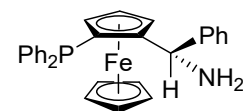

**L6**

CAS No. 498580-48-6  
consumption of **1a**: 89%  
yield of **2a**: ND

**Figure S1** Details for reactions employing ligands L1-L6

## 6. Table S2 for Further Screening toward Palladium Catalysts and Solvents

Table S2 Further screening toward palladium catalysts and solvents under ligand-L4 condition

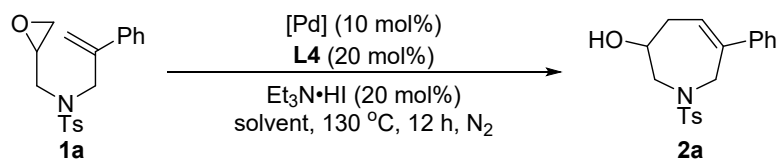

| Entry | Cat. [Pd]                                          | Solvent           | Yield of <b>2a</b> | Note                           |
|-------|----------------------------------------------------|-------------------|--------------------|--------------------------------|
| 1     | none                                               | PhMe              | ND                 | 66% of <b>1a</b> was recovered |
| 2     | PdCl <sub>2</sub>                                  | PhMe              | 42%                | 15% of <b>1a</b> was recovered |
| 3     | Pd(OAc) <sub>2</sub>                               | PhMe              | trace              | 70% of <b>1a</b> was recovered |
| 4     | PdCl <sub>2</sub> (PPh <sub>3</sub> ) <sub>2</sub> | PhMe              | trace              | 69% of <b>1a</b> was recovered |
| 5     | allylpalladium chloride dimer                      | PhMe              | 34%                | messy reaction system          |
| 6     | Pd(dba) <sub>2</sub>                               | PhMe              | 75%                | -                              |
| 7     | Pd(PPh <sub>3</sub> ) <sub>4</sub>                 | PhCF <sub>3</sub> | 73%                | -                              |
| 8     | Pd(PPh <sub>3</sub> ) <sub>4</sub>                 | dioxane           | trace              | 80% of <b>1a</b> was recovered |
| 9     | Pd(PPh <sub>3</sub> ) <sub>4</sub>                 | MeCN              | trace              | 21% of <b>1a</b> was recovered |
| 10    | Pd(PPh <sub>3</sub> ) <sub>4</sub>                 | DMF               | ND                 | <b>1a</b> was decomposed       |



## 7. Time Course Experiments of **3i**

Table S3 Time Course Experiments of **3i**

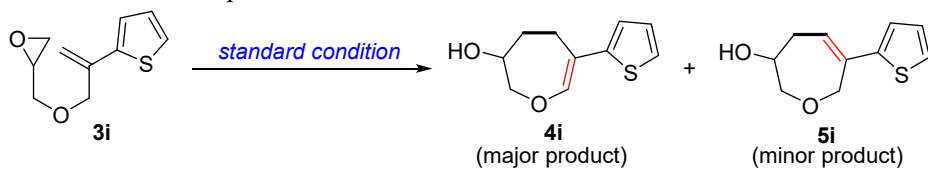

| entry | reaction time | consumption of <b>3i</b> | <b>4i:5i</b> <sup>a</sup> |
|-------|---------------|--------------------------|---------------------------|
| 1     | 5 h           | 66%                      | 6.0:1                     |
| 2     | 9 h           | 100%                     | 5.6:1                     |
| 3     | 15 h          | 100%                     | 5.7:1                     |
| 4     | 20 h          | 100%                     | 5.9:1                     |

<sup>a</sup> detected by GC (rough proportion)

## 8. Verification Experiments

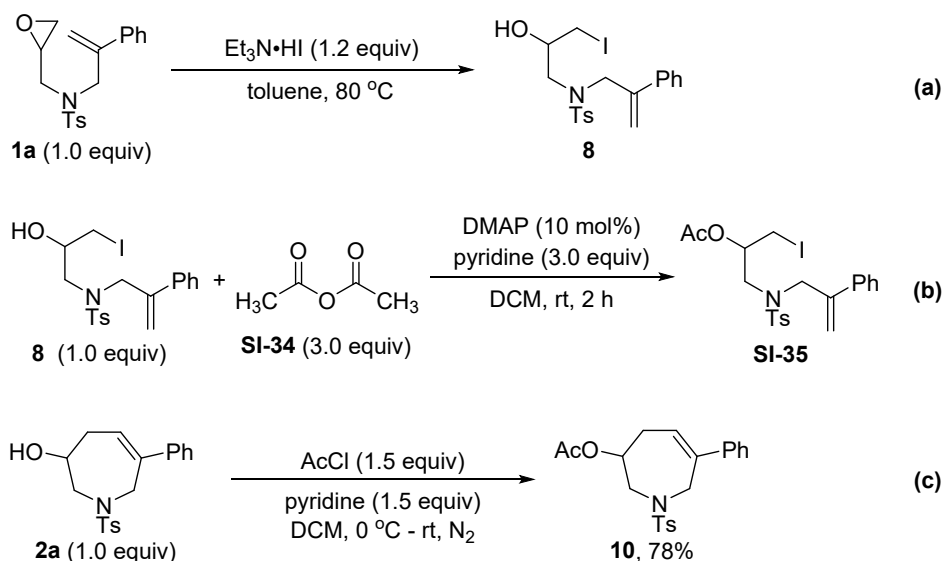

**Scheme S1** Verification experiments of intermediate

**(Eq. a) Preparation of iodide 8:** To a solution of the epoxide **1a** (0.58 g, 1.7 mmol) in toluene (10 mL) at rt was added  $\text{Et}_3\text{N}\cdot\text{HI}$  (0.48 g, 2.1 mmol). The resulting mixture was heated to  $80^\circ\text{C}$  and stirred for 2 h. Upon completion, the reaction was quenched with 1N HCl solution (10 mL), extracted with EtOAc ( $3\times 8$  mL), dried over  $\text{Na}_2\text{SO}_4$ , concentrated, and purified on silica gel packed flash chromatography (hexanes/EtOAc = 5:1), afforded the iodide **8** as a white solid. Yield (0.74 g, 92%).  **$^1\text{H NMR}$  (400 MHz,  $\text{CDCl}_3$ ,  $\delta$  ppm):** 7.66 (d,  $J = 8.0$  Hz, 2H), 7.46 (d,  $J = 7.2$  Hz, 2H), 7.36-7.28 (m, 5H), 5.51 (s, 1H), 5.22 (s, 1H), 4.28-4.20 (m, 2H), 3.69-3.60 (m, 1H), 3.16 (dd,  $J = 15.2, 4.4$  Hz, 1H), 3.10-3.01 (m, 3H), 2.91 (s, 1H), 2.43 (s, 3H).  **$^{13}\text{C NMR}$  (100 MHz,  $\text{CDCl}_3$ ,  $\delta$  ppm):** 143.9, 142.2, 137.3, 134.5, 129.8, 128.5, 128.2, 127.4, 126.4, 117.5, 68.8, 54.2, 53.4, 21.5, 10.8.

**(Eq. b) Preparation of iodide SI-35:** To a solution of the iodide **8** (188.5 mg, 0.4 mmol), pyridine (97  $\mu\text{L}$ , 1.2 mmol) and DMAP (4.9 mg, 0.04 mmol) in DCM (4 mL) was added acetic anhydride **SI-34** (113  $\mu\text{L}$ , 1.2 mmol). The reaction was allowed to stir at room temperature for 4 h, then a 1N HCl solution (5 mL) was added to the reaction mixture and it was vigorously stirred for 10 minutes. The reaction mixture was transferred to a separatory funnel, and the organic layer was further washed with saturated aqueous  $\text{NaHCO}_3$ , dried, concentrated *in vacuo*, and purified by chromatography (hexanes/EtOAc = 5:1) to provide the product **SI-35** as a white solid. Yield (174.9 mg, 85%).  **$^1\text{H NMR}$  (400 MHz,  $\text{CDCl}_3$ ,  $\delta$  ppm):** 7.67 (d,  $J = 8.0$  Hz, 2H), 7.44 (d,  $J = 8.0$  Hz, 2H), 7.35-7.28 (m, 5H), 5.54 (s, 1H), 5.25 (s, 1H), 4.92-4.86 (m, 1H), 4.42 (d,  $J = 14.8$  Hz, 1H), 3.98 (d,  $J = 14.8$  Hz, 1H), 3.28 (dd,  $J = 14.4, 6.4$  Hz, 1H), 3.18-3.10 (m, 2H), 3.05 (dd,  $J = 10.8, 6.4$  Hz, 1H), 2.44 (s, 3H), 1.93 (s, 3H).

**Preparation of compound 10 from 9:** The operation is the same as “Typical Procedure for 7-Endo Heck-Type Isomerization”. Trace **10** was detected (the contrastive target product was obtained from the following reaction), and 50% of substrate **9** was recovered.

**(Eq. c) Preparation of compound 10 from 2a:** Under nitrogen atmosphere, to a solvent of **2a** (68.7 mg, 0.2 mmol) in DCM (4 mL) at 0°C, the pyridine (24 μL, 0.3 mmol) and acetyl chloride (21 μL, 0.3 mmol) was added slowly. The reaction mixture was keep stirring at 0°C for 10 min and then warmed to rt for another 50 min. As reaction completed, the reaction mixture was diluted with DCM (15 mL). Washings with 1N aqueous HCl (10 mL), brine (10 mL), drying, and concentration *in vacuo*, and purification by column chromatography (hexanes/EtOAc = 10:1) afforded the **10**. Yield (53.4 mg, 78%). <sup>1</sup>H NMR (400 MHz, CDCl<sub>3</sub>, δ ppm): 7.69 (d, *J* = 8.4 Hz, 2H), 7.34-7.27 (m, 7H), 5.87-5.84 (m, 1H), 5.07-5.02 (m, 1H), 4.26 (s, 2H), 3.72 (dd, *J* = 14.0, 5.2 Hz, 1H), 3.45 (dd, *J* = 14.0, 6.0 Hz, 1H), 2.71-2.64 (m, 1H), 2.60-2.53 (m, 1H), 2.42 (s, 3H), 2.05 (s, 3H).

*BHT Testing Experiment*

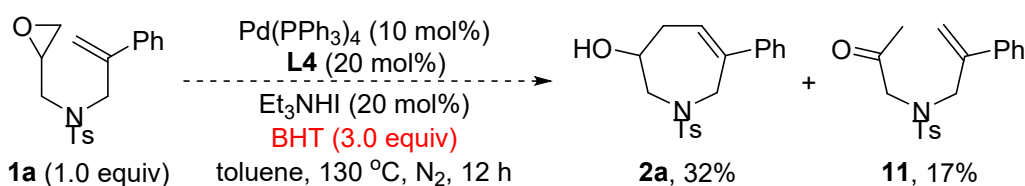

**Scheme S2** BHT testing experiment

**Analytical Data of ketone 11:**

<sup>1</sup>H NMR (400 MHz, CDCl<sub>3</sub>, δ ppm): 7.55 (d, *J* = 7.6 Hz, 2H), 7.29-7.26 (m, 3H), 7.24-7.20 (m, 2H), 7.17 (d, *J* = 8.0 Hz, 2H), 5.35 (s, 1H), 5.16 (d, *J* = 4.4 Hz, 1H), 5.09 (s, 1H), 3.80 (q, *J* = 6.0 Hz, 1H), 2.87 (dd, *J* = 14.4, 6.4 Hz, 1H), 2.79 (dd, *J* = 14.4, 7.6 Hz, 1H), 2.38 (s, 3H), 2.04 (s, 3H).

<sup>13</sup>C NMR (100 MHz, CDCl<sub>3</sub>, δ ppm): 206.6, 143.6, 142.7, 138.5, 136.1, 129.6, 128.6, 128.0, 127.1, 126.2, 117.2, 60.2, 38.5, 27.3, 21.5.

**MS (EI)** *m/z* 343 (M<sup>+</sup>)

## 9. The Synthetic Procedure and Analytical Data for Deuterium-Substrate

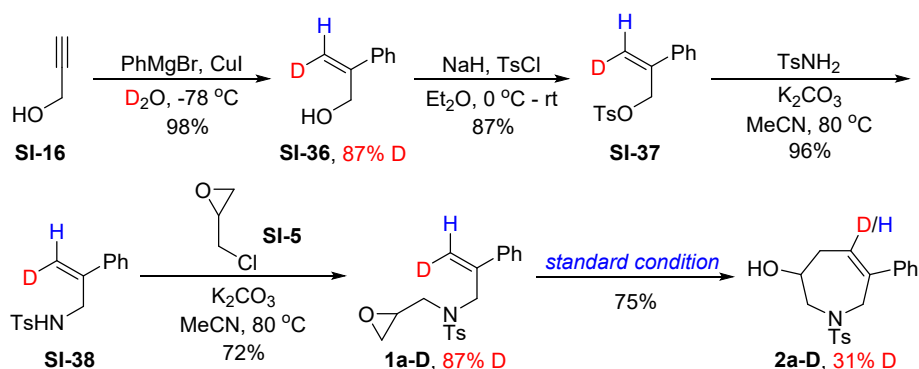

### General Procedure:

**Preparation of SI-36:** To a solution of propargyl alcohol **SI-16** (1.0 g, 18 mmol) in dry THF (40 mL) was vacuum purged three times, backfilling with N<sub>2</sub>. CuI (0.343g, 1.8 mmol) was added under stirring and N<sub>2</sub> atmosphere. The suspension was cooled to -78°C. Then a solution of PhMgBr (8.2 g, 45 mmol) in 60 mL THF was added dropwise by constant pressure funnel under vigorous stirring. The resulting mixture held at -78°C for 1 h. Then it was warmed to room temperature and stirred for 18 h. The mixture was cooled to -78°C again and quenched slowly with D<sub>2</sub>O (3.6 g, 180 mmol). After the suspension was warmed to room temperature, dilute HCl solution (1 N, 150 mL) was added and the aqueous layer was extracted with EtOAc (3×50 mL). The combined organic layers were washed brine (30 mL), dried with Na<sub>2</sub>SO<sub>4</sub>, and concentrated *in vacuo*. Purification by column chromatography (hexanes/EtOAc = 10:1 to 5:1) afforded the **SI-36** as a pale yellow liquid. Yield (2.4g, 98%). <sup>1</sup>H NMR (400 MHz, CDCl<sub>3</sub>, δ ppm): 7.43-7.41 (m, 2H), 7.35-7.26 (m, 3H), 5.43 (s, 1H), 5.32 (s, 0.13H), 4.49 (s, 2H), 2.40-2.14 (m, 1H).

**Preparation of SI-37:** To a suspension of NaH 60% (0.72 g, 18.0 mmol) in Et<sub>2</sub>O (15 mL) was added **SI-36** (2.03 g, 15.0 mmol) under N<sub>2</sub> atmosphere. The mixture was stirred for 30 min at room temperature and then cooled to 0 °C. A solution of TsCl (2.85 g, 15.0 mmol) in Et<sub>2</sub>O (5 mL) was added dropwise. The resulting mixture was warmed to room temperature and stirred for 1 h. Then the solution was quenched with a saturated aqueous solution of NH<sub>4</sub>Cl (30 mL). The aqueous layer was extracted with Et<sub>2</sub>O (3×10 mL). The combined organic layers were washed with brine (40 mL), dried with Na<sub>2</sub>SO<sub>4</sub>, and concentrated *in vacuo* to afford the crude product **SI-37** as a light yellow solid, which was used without further purification. Yield (3.76 g, 87%)

**Preparation of SI-38:** The **SI-37** (3.26 g, 11.2 mmol) was dissolved in 35 mL acetonitrile, and then *p*-toluenesulfonamide (3.85 g, 22.5 mmol), K<sub>2</sub>CO<sub>3</sub> (3.11 g, 22.5 mmol) was added successively. The resulting mixture was stirred and refluxed at 80 °C for 3.5 h. After successive filtration and purification by column chromatography (hexanes/EtOAc = 5:1), compound **SI-38** was obtained as a white solid. Yield (3.1 g, 96%)

**Preparation of 1a-D:** The **SI-38** (1.59 g, 5.5 mmol), (±)-epichlorohydrin **SI-5** (1.3 mL, 16.5

mmol), and  $K_2CO_3$  (1.08 g, 7.8 mmol) was added successively to 15 mL acetonitrile. The resulting mixture was stirred and refluxed at 80 °C for 9 h. The precipitate was removed by filtration, and the filtrate was concentrated *in vacuo*. The **1a-D** was obtained as a white solid by column chromatographic purification (hexanes/EtOAc = 10:1 to 5:1) of the crude product. Yield (1.35 g, 72%, 87% D).  $^1H$  NMR (400 MHz,  $CDCl_3$ ,  $\delta$  ppm): 7.67 (d,  $J$  = 8.0 Hz, 2H), 7.43 (dd,  $J$  = 8.0, 1.6 Hz, 2H), 7.35-7.28 (m, 5H), 5.49-5.45 (m, 1H), 5.28 (s, 0.13H), 4.31 (dd,  $J$  = 18.8, 15.2 Hz, 2H), 3.30 (dd,  $J$  = 15.2, 4.8 Hz, 1H), 3.09 (dd,  $J$  = 15.2, 6.0 Hz, 1H), 2.94-2.88 (m, 1H), 2.63 (t, 4.4 Hz, 1H), 2.43 (s, 3H), 2.40 (dd,  $J$  = 4.8, 2.4 Hz, 1H).

**Preparation of 2a-D:** Substrate **1a-D** (68.9 mg, 0.2 mmol). The operation is the same as “Typical Procedure for 7-Endo Heck-Type Isomerization”. Yield (51.5 mg, 75%, 31% D).  $^1H$  NMR (400 MHz,  $CDCl_3$ ,  $\delta$  ppm): 7.70 (d,  $J$  = 8.4 Hz, 2H), 7.41 (d,  $J$  = 7.6 Hz, 2H), 7.35-7.27 (m, 5H), 5.94 (t,  $J$  = 6.4 Hz, 0.69H), 4.46-4.40 (m, 1H), 4.10-3.95 (m, 2H), 3.59-3.41 (m, 2H), 2.74-2.65 (m, 1H), 2.59-2.51 (m, 1H), 2.46-2.39 (m, 4H).

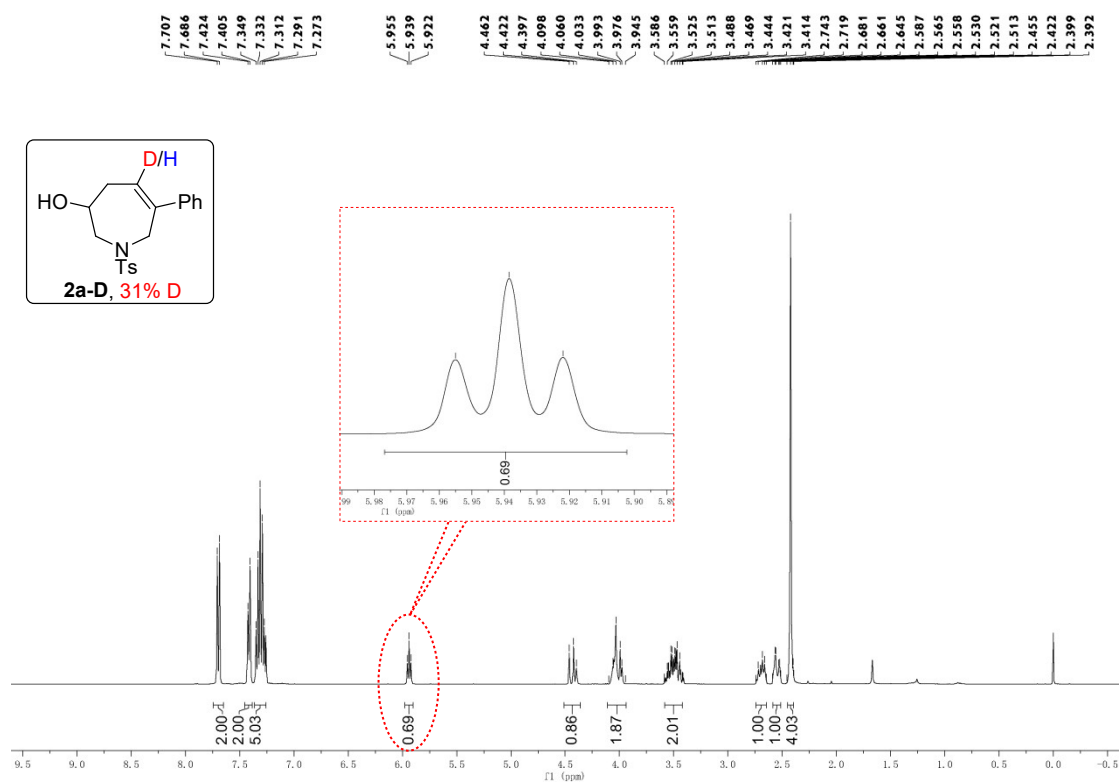

## 10. Computational Details

Geometry optimizations were performed using the B3LYP<sup>1</sup> density functional with Grimme's empirical dispersion-correction (D3)<sup>2</sup> and Becke-Johnson (BJ)'s damping schemes<sup>3</sup> (denoted as B3LYP-D3BJ) implemented in Gaussian 09<sup>4</sup> with the SMD<sup>5</sup> solvent model and toluene as the solvent. The [Lanl2dz]/[6-31G(d,p)] basis sets<sup>6</sup> were used for [Pd, Fe, I]/[C, H, O, N, S, P] atoms, respectively. Frequency calculations were carried out at the same level with geometry optimization to provide thermal corrections to the energies and to confirm the obtained stationary points are either intermediates (with zero imaginary frequency) or transition states (with only one imaginary frequency). 3D geometry structures were drawn by CYLview software.<sup>7</sup>

### References:

- (1) (a) Becke, A. D., Density-functional exchange-energy approximation with correct asymptotic behavior. *Phys. Rev. A* **1988**, *38*, 3098-3100; (b) Lee, C.; Yang, W.; Parr, R. G., Development of the Colle-Salvetti correlation-energy formula into a functional of the electron density. *Phys. Rev. B* **1988**, *37*, 785-789; (c) Becke, A. D., A new mixing of Hartree-Fock and local density-functional theories. *J. Chem. Phys.* **1993**, *98*, 1372-1377.
- (2) (a) Grimme, S.; Antony, J.; Ehrlich, S.; Krieg, H., A consistent and accurate ab initio parametrization of density functional dispersion correction (DFT-D) for the 94 elements H-Pu. *J. Chem. Phys.* **2010**, *132*, 154104; (b) Grimme, S.; Hansen, A.; Brandenburg, J. G.; Bannwarth, C., Dispersion-corrected mean-field electronic structure methods. *Chem. Rev.* **2016**, *116*, 5105-5154.
- (3) Becke, A. D.; Johnson, E. R., Exchange-hole dipole moment and the dispersion interaction. *J. Chem. Phys.* **2005**, *122*, 154104.
- (4) Frisch, M. J.; Trucks, G. W.; Schlegel, H. B.; Scuseria, G. E.; Robb, M. A.; Cheeseman, J. R.; Scalmani, G.; Barone, V.; Mennucci, B.; Petersson, G. A.; Nakatsuji, H.; Caricato, M.; Li, X.; Hratchian, H. P.; Izmaylov, A. F.; Bloino, J.; Zheng, G.; Sonnenberg, J. L.; Hada, M.; Ehara, M.; Toyota, K.; Fukuda, R.; Hasegawa, J.; Ishida, M.; Nakajima, T.; Honda, Y.; Kitao, O.; Nakai, H.; Vreven, T.; Montgomery, J. A., Jr.; Peralta, J. E.; Ogliaro, F.; Bearpark, M.; Heyd, J. J.; Brothers, E.; Kudin, K. N.; Staroverov, V. N.; Kobayashi, R.; Normand, J.; Raghavachari, K.; Rendell, A.; Burant, J. C.; Iyengar, S. S.; Tomasi, J.; Cossi, M.; Rega, N.;

- Millam, M. J.; Klene, M.; Knox, J. E.; Cross, J. B.; Bakken, V.; Adamo, C.; Jaramillo, J.; Gomperts, R.; Stratmann, R. E.; Yazyev, O.; Austin, A. J.; Cammi, R.; Pomelli, C.; Ochterski, J. W.; Martin, R. L.; Morokuma, K.; Zakrzewski, V. G.; Voth, G. A.; Salvador, P.; Dannenberg, J. J.; Dapprich, S.; Daniels, A. D.; Farkas, Ö.; Foresman, J. B.; Ortiz, J. V.; Cioslowski, J.; Fox, D. J., *Gaussian 09, Revision D.01*, Gaussian, Inc., Wallingford CT, **2009**.
- (5) Marenich, A. V.; Cramer, C. J.; Truhlar, D. G. Universal solvation model based on solute electron density and on a continuum model of the solvent defined by the bulk dielectric constant and atomic surface tensions. *J. Phys. Chem. B.* **2009**, *113*, 6378-6396.
- (6) Hay, P. J.; Wadt, W. R. Ab initio effective core potentials for molecular calculations. Potentials for the transition metal atoms Sc to Hg. *J. Chem. Phys.* **1985**, *82*, 270-283.
- (7) Legault, C. Y., CYLview, 1.0b, Université de Sherbrooke, **2009**. (<http://www.cylview.org>)

***The dissociation of Et<sub>3</sub>N·HI into Et<sub>3</sub>N·H<sup>+</sup> and I<sup>-</sup>*** (see below) requires 36.8 kcal/mol free energy, which indicates that this is a highly unfavorable and almost impossible process under the utilized reaction condition.

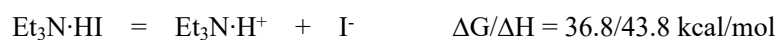

## 11. Distortion Interaction Analysis on the Distal and Proximal $\beta$ -Hydride Elimination Transition States (TS4 and TS4')

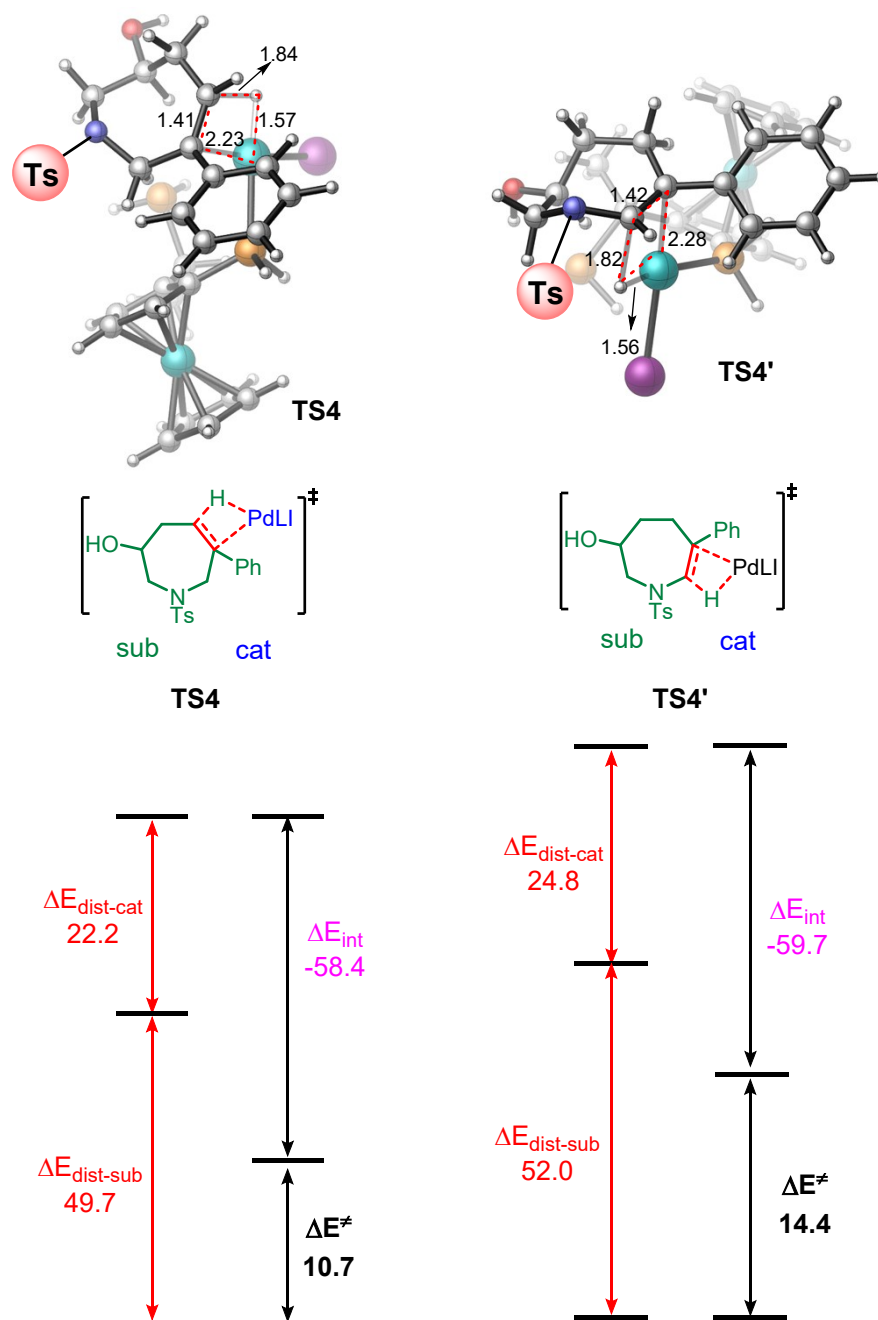

**Figure S2.** The distortion/interaction analysis on TS4 and TS4'.

The transition state structures have been separated into two parts: the cat (catalyst, in blue) part and the sub (substrate, in green) part for the distortion/interaction analysis. As shown above (Figure S2), we can see that both the distortion of the catalyst and the substrate in TS4' (24.8 and 52.0 kcal/mol) are larger compared to those in TS4 (22.2 and 49.7 kcal/mol), and this unfavorable distortion energy cannot be compensated by the slightly favorable interaction in the former (-59.7 kcal/mol) than the latter (-58.4 kcal/mol). Thus, the origin of the selectivity comes from the much



structure deformation in **TS4'**, which by close analyses is due to the steric repulsion between the “back” phosphine ligand and the substrate ring.

The different spin states of the ferrocene type ligand **L4**:

| Spin state            | singlet | Triplet | quintet |
|-----------------------|---------|---------|---------|
| $\Delta G$ (kcal/mol) | 0.0     | 11.7    | 3.7     |

## 12. Electronic Energies (E), Enthalpies (H), Gibbs Free Energies (G), and Coordinates for All the Calculated Species

**Table S4.** Energy Data for All Calculated Species

| Structures               | Electronic energy (E) | Enthalpy (H) | Gibbs free energy (G) | Imaginary Frequency | <S**2> |
|--------------------------|-----------------------|--------------|-----------------------|---------------------|--------|
| <b>Et<sub>3</sub>NHI</b> | -304.516221           | -304.28154   | -304.333691           |                     |        |
| <b>IN1</b>               | -1704.481878          | -1703.983578 | -1704.079831          |                     |        |
| <b>TS1</b>               | -1704.462382          | -1703.970673 | -1704.063859          | -83.89              |        |
| <b>NEt<sub>3</sub></b>   | -292.46706            | -292.250457  | -292.294939           |                     |        |
| <b>IN2</b>               | -1411.983352          | -1411.709625 | -1411.780871          |                     |        |
| <b>1a</b>                | -1415.281459          | -1414.892586 | -1414.968808          |                     |        |
| <b>IN3</b>               | -2827.293481          | -2826.626942 | -2826.754194          |                     |        |
| <b>TS2</b>               | -2827.255851          | -2826.590996 | -2826.715192          | -375.86             |        |
| <b>IN4</b>               | -2827.307961          | -2826.638069 | -2826.763598          |                     |        |
| <b>IN4t</b>              | -2827.343975          | -2826.673655 | -2826.799783          |                     | 2.0290 |
| <b>IN5</b>               | -1415.911007          | -1415.508956 | -1415.586913          |                     | 0.7769 |
| <b>·Pd(I)LI</b>          | -1411.382884          | -1411.117345 | -1411.189352          |                     | 0.7524 |
| <b>IN6</b>               | -2827.3386            | -2826.667861 | -2826.792736          |                     |        |
| <b>TS4</b>               | -2827.316983          | -2826.651292 | -2826.775721          | -507.22             |        |
| <b>TS4'</b>              | -2827.311335          | -2826.645412 | -2826.770244          | -389.11             |        |
| <b>2a</b>                | -1415.328706          | -1414.937222 | -1415.011731          |                     |        |
| <b>TS5</b>               | -2827.278479          | -2826.614677 | -2826.741349          | -342.60             |        |
| <b>TS2t</b>              | -2827.232039          | -2826.569778 | -2826.700800          | -405.84             | 2.0641 |

## Coordinates

|                          |           |           |           |    |           |           |           |
|--------------------------|-----------|-----------|-----------|----|-----------|-----------|-----------|
| <b>Et<sub>3</sub>NHI</b> |           |           |           | C  | 1.603478  | -6.303458 | -3.675195 |
| N                        | -1.258326 | -0.385175 | -0.096331 | C  | 2.320582  | -5.145705 | -4.103866 |
| C                        | -0.912654 | 0.449219  | -1.302167 | H  | 0.923000  | -6.217986 | -6.959616 |
| H                        | -1.404049 | -0.031561 | -2.146969 | H  | 0.315619  | -7.740069 | -4.814746 |
| H                        | 0.170409  | 0.375925  | -1.440226 | H  | 1.517841  | -6.656033 | -2.656631 |
| C                        | -1.380133 | 1.893888  | -1.201543 | H  | 2.882190  | -4.475386 | -3.467883 |
| H                        | -1.248680 | 2.361675  | -2.181508 | H  | 2.511426  | -4.202008 | -6.128305 |
| H                        | -2.442097 | 1.945105  | -0.945281 | C  | 1.370279  | -1.371783 | -3.520501 |
| H                        | -0.806810 | 2.478482  | -0.478464 | H  | 1.986026  | -0.751606 | -2.863127 |
| C                        | -0.781961 | 0.240008  | 1.189076  | H  | 0.791170  | -0.699265 | -4.162148 |
| H                        | -1.262577 | 1.215819  | 1.241076  | H  | 2.038661  | -1.958817 | -4.160867 |
| H                        | 0.298043  | 0.386630  | 1.090158  | P  | -0.699658 | -1.337636 | -1.528377 |
| C                        | -1.139085 | -0.564450 | 2.430809  | Pd | -1.972372 | -2.858497 | -0.344600 |
| H                        | -0.918630 | 0.051153  | 3.307670  | H  | -1.200655 | -0.407558 | -2.484678 |
| H                        | -2.206249 | -0.803402 | 2.448609  | H  | 0.280934  | -0.452346 | -0.999854 |
| H                        | -0.561316 | -1.486743 | 2.523056  | H  | -1.707943 | -6.185498 | -1.538478 |
| C                        | -0.805886 | -1.814818 | -0.240801 | H  | 0.056478  | -5.224266 | -0.967133 |
| H                        | 0.286673  | -1.810716 | -0.177446 | N  | -5.399295 | -3.381756 | -1.396344 |
| H                        | -1.202942 | -2.341805 | 0.625577  | C  | -4.944350 | -4.741189 | -1.861453 |
| C                        | -1.305397 | -2.487549 | -1.511379 | H  | -3.951432 | -4.595512 | -2.281170 |
| H                        | -0.813314 | -2.116098 | -2.413045 | H  | -5.625240 | -5.040987 | -2.663613 |
| H                        | -1.091081 | -3.557442 | -1.435727 | C  | -4.881952 | -5.769098 | -0.742486 |
| H                        | -2.387693 | -2.368786 | -1.615742 | H  | -4.388865 | -6.664678 | -1.131116 |
| I                        | -4.680392 | -0.466520 | 0.088418  | H  | -4.288527 | -5.394875 | 0.095874  |
| H                        | -2.313890 | -0.410019 | -0.042507 | H  | -5.869203 | -6.065557 | -0.381859 |
| <b>INI</b>               |           |           |           | C  | -6.743370 | -3.457142 | -0.707449 |
| P                        | -1.269640 | -4.841964 | -1.302597 | H  | -6.574857 | -4.038766 | 0.197808  |
| C                        | -1.055036 | -4.394601 | -3.061482 | H  | -7.400250 | -4.020917 | -1.376183 |
| C                        | -0.357146 | -3.228421 | -3.541361 | C  | -7.341918 | -2.107089 | -0.344368 |
| C                        | -1.722533 | -4.993243 | -4.180346 | H  | -8.223889 | -2.291122 | 0.276122  |
| C                        | -0.607427 | -3.126827 | -4.947338 | H  | -6.641931 | -1.510054 | 0.245059  |
| H                        | -2.300089 | -5.907224 | -4.148733 | H  | -7.665449 | -1.536740 | -1.217898 |
| C                        | -1.444451 | -4.212272 | -5.341918 | C  | -5.382651 | -2.358885 | -2.505678 |
| H                        | -0.184690 | -2.385432 | -5.609755 | H  | -6.226727 | -2.594590 | -3.160511 |
| H                        | -1.768213 | -4.431296 | -6.350150 | H  | -5.573186 | -1.400702 | -2.023781 |
| C                        | 0.457073  | -2.282780 | -2.701235 | C  | -4.065542 | -2.301922 | -3.262174 |
| H                        | 1.068920  | -2.875654 | -2.011040 | H  | -3.918018 | -3.147103 | -3.936244 |
| Fe                       | 0.306273  | -4.933979 | -4.516454 | H  | -4.052514 | -1.387896 | -3.862594 |
| C                        | 0.963166  | -6.874129 | -4.816730 | H  | -3.223950 | -2.262565 | -2.560722 |
| C                        | 1.284496  | -6.068681 | -5.951503 | I  | -3.929047 | -2.356654 | 1.690485  |
| C                        | 2.123615  | -5.000736 | -5.511234 | H  | -4.713161 | -3.065435 | -0.672077 |

|            |           |           |           |                        |           |           |           |
|------------|-----------|-----------|-----------|------------------------|-----------|-----------|-----------|
| <b>TS1</b> |           |           |           | C                      | -5.954573 | -2.616365 | 1.085978  |
| P          | -2.222850 | -4.072401 | -2.853333 | H                      | -5.994593 | -2.914403 | 2.139007  |
| C          | -0.965459 | -3.891228 | -4.145701 | H                      | -5.026559 | -2.067361 | 0.913779  |
| C          | 0.176953  | -3.010933 | -4.100066 | H                      | -6.787539 | -1.932773 | 0.906585  |
| C          | -0.999155 | -4.504267 | -5.441820 | C                      | -6.735402 | -2.654208 | -1.778407 |
| C          | 0.828190  | -3.101224 | -5.369161 | H                      | -7.769587 | -3.002870 | -1.608314 |
| H          | -1.728072 | -5.230749 | -5.773136 | H                      | -6.597591 | -1.726884 | -1.222495 |
| C          | 0.109313  | -4.018747 | -6.189814 | C                      | -6.519561 | -2.351251 | -3.257870 |
| H          | 1.741571  | -2.594149 | -5.643227 | H                      | -6.794277 | -3.184142 | -3.911736 |
| H          | 0.382413  | -4.323422 | -7.190411 | H                      | -7.140473 | -1.494327 | -3.536008 |
| C          | 0.580856  | -2.134619 | -2.943495 | H                      | -5.476283 | -2.079068 | -3.444654 |
| H          | 0.563211  | -2.733661 | -2.024954 | I                      | -4.141517 | 0.204882  | -1.022375 |
| Fe         | 0.754429  | -4.966041 | -4.459121 | H                      | -4.270012 | -2.901645 | -1.529524 |
| C          | 0.854533  | -7.024125 | -4.257773 |                        |           |           |           |
| C          | 1.967873  | -6.550390 | -5.016334 | <b>NEt<sub>3</sub></b> |           |           |           |
| C          | 2.698339  | -5.633019 | -4.202702 | N                      | -1.029410 | -0.381462 | -0.107699 |
| C          | 0.897873  | -6.397732 | -2.975498 | C                      | -0.679298 | 0.537126  | -1.196244 |
| C          | 2.037192  | -5.538590 | -2.940321 | H                      | -0.776684 | -0.005125 | -2.141248 |
| H          | 2.193630  | -6.808378 | -6.041704 | H                      | 0.380058  | 0.852454  | -1.130599 |
| H          | 0.092728  | -7.707806 | -4.605756 | C                      | -1.590841 | 1.761086  | -1.249051 |
| H          | 0.168728  | -6.517445 | -2.185491 | H                      | -1.324511 | 2.400972  | -2.097537 |
| H          | 2.330300  | -4.904657 | -2.114755 | H                      | -2.634080 | 1.449607  | -1.360606 |
| H          | 3.576799  | -5.078677 | -4.502500 | H                      | -1.518398 | 2.370899  | -0.342833 |
| C          | 1.968810  | -1.515661 | -3.103969 | C                      | -0.545581 | 0.099004  | 1.190909  |
| H          | 2.238974  | -0.940667 | -2.214346 | H                      | -0.619874 | 1.190277  | 1.197669  |
| H          | 2.006922  | -0.839025 | -3.963286 | H                      | 0.526808  | -0.136777 | 1.332373  |
| H          | 2.725134  | -2.295018 | -3.249974 | C                      | -1.363319 | -0.444405 | 2.360649  |
| P          | -0.799742 | -0.884905 | -2.671073 | H                      | -0.996965 | -0.033894 | 3.308100  |
| Pd         | -2.951226 | -2.084782 | -2.029445 | H                      | -2.416152 | -0.168785 | 2.244957  |
| H          | -0.602883 | -0.061001 | -3.808133 | H                      | -1.308896 | -1.535446 | 2.433301  |
| H          | -0.185141 | -0.030945 | -1.724358 | C                      | -0.584117 | -1.751009 | -0.385193 |
| H          | -3.086086 | -4.982690 | -3.496309 | H                      | 0.456175  | -1.765483 | -0.763556 |
| H          | -1.637157 | -4.980388 | -1.942139 | H                      | -0.571479 | -2.301769 | 0.559728  |
| N          | -5.788011 | -3.637765 | -1.218184 | C                      | -1.508045 | -2.483601 | -1.355567 |
| C          | -5.788009 | -4.893844 | -1.986872 | H                      | -1.548776 | -1.997015 | -2.335390 |
| H          | -5.437426 | -4.652560 | -2.992838 | H                      | -1.162082 | -3.511139 | -1.513160 |
| H          | -6.819820 | -5.272840 | -2.088658 | H                      | -2.526258 | -2.515788 | -0.955479 |
| C          | -4.901759 | -5.994134 | -1.405382 |                        |           |           |           |
| H          | -4.750322 | -6.772985 | -2.159436 | <b>IN2</b>             |           |           |           |
| H          | -3.920708 | -5.608831 | -1.112338 | P                      | -2.502070 | -4.060503 | -2.915751 |
| H          | -5.346423 | -6.472230 | -0.528941 | C                      | -1.213797 | -3.796942 | -4.151517 |
| C          | -6.016516 | -3.869619 | 0.220557  | C                      | 0.015506  | -3.071229 | -3.934857 |
| H          | -5.242464 | -4.557855 | 0.564977  | C                      | -1.299740 | -4.118371 | -5.546657 |
| H          | -6.987496 | -4.378780 | 0.360820  | C                      | 0.666428  | -2.962625 | -5.201683 |

|           |           |           |           |            |            |           |           |
|-----------|-----------|-----------|-----------|------------|------------|-----------|-----------|
| H         | -2.099380 | -4.675192 | -6.014616 | C          | 1.612338   | 3.097212  | 4.359369  |
| C         | -0.137977 | -3.606462 | -6.186948 | H          | 2.258496   | 1.222082  | 3.549092  |
| H         | 1.632271  | -2.511655 | -5.374552 | C          | 0.581962   | 4.032986  | 4.452611  |
| H         | 0.113022  | -3.723916 | -7.231718 | H          | -1.420149  | 4.533754  | 3.825590  |
| C         | 0.495011  | -2.510119 | -2.621007 | H          | 2.548299   | 3.263496  | 4.884637  |
| H         | 0.432779  | -3.294796 | -1.857276 | H          | 0.713043   | 4.934308  | 5.043774  |
| Fe        | 0.385576  | -4.957276 | -4.695459 | C          | -1.128849  | -0.143535 | 1.997063  |
| C         | 0.286563  | -7.011048 | -4.950216 | H          | -1.993083  | 0.203534  | 2.553676  |
| C         | 1.449879  | -6.490836 | -5.593992 | H          | -1.263076  | -1.019290 | 1.376658  |
| C         | 2.252608  | -5.848209 | -4.604158 | C          | -0.613473  | -0.190439 | -1.238038 |
| C         | 0.371131  | -6.688196 | -3.562395 | C          | -1.024949  | 1.205966  | -1.096166 |
| C         | 1.585615  | -5.969614 | -3.347200 | O          | -0.833056  | 0.624670  | -2.398091 |
| H         | 1.663855  | -6.536309 | -6.652747 | H          | -1.360946  | -0.969039 | -1.078228 |
| H         | -0.531349 | -7.526042 | -5.434474 | H          | -0.289846  | 1.956527  | -0.805605 |
| H         | -0.373026 | -6.918098 | -2.812192 | H          | -2.055786  | 1.439803  | -0.832916 |
| H         | 1.927274  | -5.564595 | -2.404619 | S          | 1.452018   | -2.652299 | 0.669864  |
| H         | 3.182695  | -5.326349 | -4.781767 | O          | 1.887915   | -3.260573 | -0.592896 |
| C         | 1.925758  | -1.974687 | -2.669180 | O          | 2.309789   | -2.677276 | 1.860842  |
| H         | 2.243602  | -1.632758 | -1.680731 | C          | -0.102878  | -3.409061 | 1.111908  |
| H         | 2.014289  | -1.131706 | -3.361303 | C          | -0.462934  | -3.506192 | 2.454729  |
| H         | 2.616033  | -2.759424 | -2.996620 | C          | -0.970362  | -3.826181 | 0.099486  |
| P         | -0.760561 | -1.246194 | -2.032959 | C          | -1.713542  | -4.025710 | 2.783375  |
| Pd        | -2.980896 | -2.172057 | -1.735260 | H          | 0.226015   | -3.178516 | 3.224289  |
| H         | -0.555877 | -0.193680 | -2.952425 | C          | -2.217209  | -4.336507 | 0.446414  |
| H         | -0.107716 | -0.688331 | -0.913453 | H          | -0.664678  | -3.764361 | -0.939030 |
| H         | -3.502297 | -4.691721 | -3.676590 | C          | -2.608956  | -4.442815 | 1.790314  |
| H         | -2.071340 | -5.156098 | -2.138887 | H          | -1.999260  | -4.105142 | 3.828204  |
| H         | -4.392799 | -2.802440 | -1.523915 | H          | -2.896072  | -4.665275 | -0.335549 |
| I         | -3.901681 | -0.076996 | -0.273541 | C          | -3.952888  | -5.020847 | 2.149759  |
|           |           |           |           | H          | -3.948681  | -6.112336 | 2.041487  |
| <b>1a</b> |           |           |           | H          | -4.224260  | -4.792163 | 3.183753  |
| N         | 1.096058  | -1.046466 | 0.352204  | H          | -4.740481  | -4.635022 | 1.494652  |
| C         | 1.303430  | -0.036228 | 1.384658  |            |            |           |           |
| H         | 1.999229  | -0.447953 | 2.119562  | <b>IN3</b> |            |           |           |
| H         | 1.820951  | 0.810578  | 0.916955  | P          | -10.383916 | -1.800442 | -1.818675 |
| C         | 0.822906  | -0.614878 | -1.020002 | C          | -9.727616  | -2.845998 | -3.133805 |
| H         | 1.076715  | -1.433824 | -1.694739 | C          | -10.489529 | -3.741420 | -3.970322 |
| H         | 1.483327  | 0.225926  | -1.264737 | C          | -8.335894  | -3.043452 | -3.420693 |
| C         | 0.056449  | 0.469783  | 2.094495  | C          | -9.551801  | -4.474504 | -4.761426 |
| C         | 0.243743  | 1.693770  | 2.914224  | H          | -7.522356  | -2.517908 | -2.941499 |
| C         | -0.780233 | 2.652490  | 3.008418  | C          | -8.234115  | -4.044991 | -4.425055 |
| C         | 1.448038  | 1.942173  | 3.595177  | H          | -9.802293  | -5.197282 | -5.524015 |
| C         | -0.616161 | 3.805392  | 3.771905  | H          | -7.318529  | -4.391084 | -4.883735 |
| H         | -1.701982 | 2.496341  | 2.456992  | C          | -11.987547 | -3.905270 | -3.968962 |

|    |            |           |           |            |            |           |           |
|----|------------|-----------|-----------|------------|------------|-----------|-----------|
| H  | -12.453270 | -2.916264 | -4.052569 | H          | -8.814466  | -1.658032 | 5.675322  |
| Fe | -9.357768  | -2.434872 | -5.105756 | H          | -8.996892  | -1.831365 | 3.846933  |
| C  | -8.482999  | -0.680919 | -5.770487 | C          | -9.335150  | -0.682343 | 1.470962  |
| C  | -8.411163  | -1.682903 | -6.785450 | C          | -10.353087 | 0.075320  | 2.203771  |
| C  | -9.743166  | -2.081645 | -7.107925 | O          | -9.988215  | 0.434618  | 0.855535  |
| C  | -9.860143  | -0.461135 | -5.466627 | H          | -9.636355  | -1.647829 | 1.069815  |
| C  | -10.639949 | -1.326751 | -6.291474 | H          | -10.042386 | 0.786144  | 2.968881  |
| H  | -7.504989  | -2.100128 | -7.202150 | H          | -11.352812 | -0.341547 | 2.318365  |
| H  | -7.641865  | -0.204521 | -5.286511 | S          | -6.870597  | -2.849731 | 0.818650  |
| H  | -10.242941 | 0.214264  | -4.713584 | O          | -6.927246  | -2.096437 | -0.449414 |
| H  | -11.717603 | -1.416337 | -6.279008 | O          | -5.642115  | -3.580886 | 1.161379  |
| H  | -10.021713 | -2.847073 | -7.818886 | C          | -8.232870  | -4.002628 | 0.784899  |
| C  | -12.506715 | -4.799927 | -5.094742 | C          | -8.993650  | -4.278781 | 1.921654  |
| H  | -13.599056 | -4.840559 | -5.083773 | C          | -8.468182  | -4.670521 | -0.417632 |
| H  | -12.130819 | -5.823116 | -4.996399 | C          | -10.022313 | -5.212233 | 1.834486  |
| H  | -12.190176 | -4.413113 | -6.069009 | H          | -8.794220  | -3.760320 | 2.851241  |
| P  | -12.513138 | -4.480792 | -2.261887 | C          | -9.488974  | -5.614754 | -0.479341 |
| Pd | -11.974906 | -2.841602 | -0.560763 | H          | -7.869203  | -4.454285 | -1.292758 |
| H  | -12.022096 | -5.805045 | -2.257682 | C          | -10.286458 | -5.895006 | 0.637518  |
| H  | -13.879245 | -4.767591 | -2.475360 | H          | -10.636609 | -5.411469 | 2.706959  |
| H  | -9.201117  | -1.359632 | -1.207852 | H          | -9.669215  | -6.138418 | -1.413124 |
| H  | -10.807306 | -0.613286 | -2.447507 | C          | -11.421647 | -6.877525 | 0.556747  |
| H  | -11.723809 | -1.664716 | 0.416005  | H          | -11.372760 | -7.475504 | -0.357451 |
| I  | -13.820158 | -3.605447 | 1.288976  | H          | -11.417017 | -7.560691 | 1.412237  |
| N  | -7.221753  | -1.794385 | 2.084449  | H          | -12.380691 | -6.346234 | 0.575239  |
| C  | -6.307310  | -1.768924 | 3.228896  |            |            |           |           |
| H  | -5.724148  | -2.690603 | 3.206814  | <b>TS2</b> |            |           |           |
| H  | -5.584215  | -0.948187 | 3.119450  | P          | -10.192773 | -1.273479 | -1.936992 |
| C  | -7.848117  | -0.514855 | 1.700968  | C          | -9.847472  | -2.543079 | -3.191345 |
| H  | -7.384587  | -0.114736 | 0.794229  | C          | -10.832050 | -3.418269 | -3.777274 |
| H  | -7.661233  | 0.187823  | 2.514618  | C          | -8.552566  | -2.994999 | -3.610040 |
| C  | -7.010889  | -1.638267 | 4.567330  | C          | -10.125672 | -4.398441 | -4.544161 |
| C  | -6.116096  | -1.415644 | 5.733272  | H          | -7.611849  | -2.523126 | -3.361913 |
| C  | -6.534690  | -0.618021 | 6.812834  | C          | -8.727269  | -4.137307 | -4.442951 |
| C  | -4.828511  | -1.976702 | 5.785428  | H          | -10.578368 | -5.172739 | -5.146272 |
| C  | -5.707753  | -0.408597 | 7.913290  | H          | -7.940655  | -4.680829 | -4.947250 |
| H  | -7.508985  | -0.141566 | 6.773400  | C          | -12.321642 | -3.321036 | -3.583206 |
| C  | -3.999790  | -1.765322 | 6.886970  | H          | -12.610547 | -2.265941 | -3.661875 |
| H  | -4.471321  | -2.600834 | 4.972993  | Fe         | -9.701403  | -2.492087 | -5.241481 |
| C  | -4.435256  | -0.982465 | 7.956115  | C          | -8.703483  | -1.017752 | -6.302845 |
| H  | -6.052402  | 0.214595  | 8.733361  | C          | -8.933494  | -2.153174 | -7.137464 |
| H  | -3.012143  | -2.216463 | 6.908463  | C          | -10.342497 | -2.372272 | -7.206556 |
| H  | -3.787566  | -0.814475 | 8.811302  | C          | -9.970819  | -0.535467 | -5.856037 |
| C  | -8.342447  | -1.707710 | 4.699984  | C          | -10.984321 | -1.371902 | -6.414054 |

|    |            |           |           |            |            |           |           |
|----|------------|-----------|-----------|------------|------------|-----------|-----------|
| H  | -8.171956  | -2.764515 | -7.601323 | H          | -10.145542 | -1.364544 | 3.292147  |
| H  | -7.737780  | -0.617886 | -6.026566 | S          | -5.838487  | -3.454862 | 1.029319  |
| H  | -10.132035 | 0.290081  | -5.176491 | O          | -5.421155  | -2.932096 | -0.278036 |
| H  | -12.047791 | -1.284116 | -6.239495 | O          | -4.892238  | -4.161615 | 1.899806  |
| H  | -10.834415 | -3.177254 | -7.734650 | C          | -7.273749  | -4.471497 | 0.761077  |
| C  | -13.121402 | -4.132979 | -4.601317 | C          | -7.671050  | -5.375328 | 1.749268  |
| H  | -14.194645 | -3.977941 | -4.461635 | C          | -8.034185  | -4.285422 | -0.393952 |
| H  | -12.924400 | -5.204757 | -4.497922 | C          | -8.862475  | -6.074116 | 1.579417  |
| H  | -12.862356 | -3.838127 | -5.624340 | H          | -7.056029  | -5.528132 | 2.629081  |
| P  | -12.719000 | -3.743585 | -1.784788 | C          | -9.221450  | -4.996254 | -0.547048 |
| Pd | -11.419678 | -2.263308 | -0.317186 | H          | -7.700003  | -3.602449 | -1.163863 |
| H  | -12.618172 | -5.157660 | -1.885663 | C          | -9.662646  | -5.885680 | 0.442655  |
| H  | -14.135525 | -3.700304 | -1.876124 | H          | -9.183477  | -6.773854 | 2.345110  |
| H  | -8.895734  | -0.700567 | -1.873884 | H          | -9.811062  | -4.849081 | -1.444355 |
| H  | -10.774410 | -0.233760 | -2.705754 | C          | -10.986493 | -6.584316 | 0.312758  |
| H  | -10.414721 | -0.826967 | 0.768215  | H          | -11.218486 | -6.814925 | -0.730874 |
| I  | -12.190564 | -3.057719 | 2.277125  | H          | -11.008161 | -7.514587 | 0.887331  |
| N  | -6.420978  | -2.163350 | 1.938044  | H          | -11.780567 | -5.932964 | 0.698225  |
| C  | -5.956994  | -1.904636 | 3.292888  |            |            |           |           |
| H  | -5.129103  | -2.588186 | 3.498831  | <b>IN4</b> |            |           |           |
| H  | -5.544467  | -0.888750 | 3.324371  | P          | -9.905810  | -1.846885 | -1.788720 |
| C  | -7.259836  | -1.171051 | 1.273093  | C          | -9.706843  | -2.899962 | -3.254937 |
| H  | -7.134053  | -1.249303 | 0.191452  | C          | -10.780402 | -3.583214 | -3.933072 |
| H  | -6.936678  | -0.166916 | 1.570969  | C          | -8.470587  | -3.365020 | -3.813164 |
| C  | -7.012817  | -2.050485 | 4.384617  | C          | -10.187583 | -4.459016 | -4.896817 |
| C  | -6.762165  | -1.309629 | 5.641469  | H          | -7.486422  | -3.018002 | -3.529581 |
| C  | -7.829042  | -0.869328 | 6.446371  | C          | -8.769842  | -4.322211 | -4.824476 |
| C  | -5.450227  | -1.022476 | 6.058587  | H          | -10.725549 | -5.077863 | -5.600129 |
| C  | -7.591559  | -0.180360 | 7.631823  | H          | -8.050324  | -4.823556 | -5.456740 |
| H  | -8.851209  | -1.052858 | 6.131340  | C          | -12.248040 | -3.418519 | -3.643704 |
| C  | -5.214468  | -0.337802 | 7.249730  | H          | -12.467121 | -2.348107 | -3.552837 |
| H  | -4.604345  | -1.356472 | 5.467216  | Fe         | -9.642987  | -2.494087 | -5.269524 |
| C  | -6.282562  | 0.086942  | 8.040008  | C          | -8.592692  | -0.905402 | -6.081814 |
| H  | -8.430015  | 0.155796  | 8.234257  | C          | -8.903930  | -1.860850 | -7.096611 |
| H  | -4.193307  | -0.138228 | 7.559922  | C          | -10.324238 | -1.993677 | -7.157620 |
| H  | -6.098150  | 0.625776  | 8.964311  | C          | -9.821050  | -0.448180 | -5.516139 |
| C  | -8.105693  | -2.825603 | 4.217376  | C          | -10.891481 | -1.120445 | -6.179558 |
| H  | -8.812061  | -2.991222 | 5.022630  | H          | -8.188244  | -2.418777 | -7.684288 |
| H  | -8.259062  | -3.404871 | 3.316251  | H          | -7.601079  | -0.610152 | -5.768277 |
| C  | -8.711397  | -1.395157 | 1.641190  | H          | -9.920378  | 0.250988  | -4.697016 |
| C  | -9.209650  | -0.951153 | 2.928356  | H          | -11.944034 | -1.013452 | -5.955828 |
| O  | -9.609868  | -0.325487 | 1.239624  | H          | -10.871864 | -2.665834 | -7.803530 |
| H  | -9.099816  | -2.358053 | 1.306795  | C          | -13.155724 | -4.026721 | -4.712590 |
| H  | -8.752007  | -0.104617 | 3.426762  | H          | -14.207128 | -3.833115 | -4.483399 |

|    |            |           |           |             |            |           |           |
|----|------------|-----------|-----------|-------------|------------|-----------|-----------|
| H  | -13.022415 | -5.111166 | -4.778733 | C           | -9.109480  | -5.884191 | 1.771571  |
| H  | -12.936215 | -3.597573 | -5.696525 | H           | -7.497288  | -4.989031 | 2.882910  |
| P  | -12.586261 | -4.078398 | -1.910784 | C           | -9.198637  | -5.365946 | -0.580391 |
| Pd | -11.300442 | -2.957340 | -0.304013 | H           | -7.659137  | -4.035243 | -1.304178 |
| H  | -12.458072 | -5.467675 | -2.175667 | C           | -9.737903  | -6.033948 | 0.524929  |
| H  | -14.004381 | -4.037602 | -1.924523 | H           | -9.515138  | -6.399204 | 2.636781  |
| H  | -8.549497  | -1.496894 | -1.595369 | H           | -9.656625  | -5.479740 | -1.556966 |
| H  | -10.324595 | -0.614634 | -2.346449 | C           | -10.995643 | -6.847664 | 0.400667  |
| H  | -10.481216 | -0.478226 | 0.748699  | H           | -11.171003 | -7.162673 | -0.631622 |
| I  | -12.131514 | -3.230884 | 2.314779  | H           | -10.961316 | -7.739915 | 1.033398  |
| N  | -6.625621  | -2.057273 | 1.942312  | H           | -11.853962 | -6.246164 | 0.723270  |
| C  | -6.069286  | -1.843932 | 3.266123  |             |            |           |           |
| H  | -5.435607  | -2.705889 | 3.509480  | <b>IN4t</b> |            |           |           |
| H  | -5.399348  | -0.973264 | 3.241546  | P           | -9.653810  | -1.687306 | -1.695230 |
| C  | -7.415039  | -0.986542 | 1.327217  | C           | -9.486309  | -2.726305 | -3.168347 |
| H  | -7.274136  | -1.013797 | 0.246452  | C           | -10.579639 | -3.347474 | -3.873375 |
| H  | -7.025785  | -0.023399 | 1.680887  | C           | -8.262554  | -3.230521 | -3.720459 |
| C  | -7.108718  | -1.661987 | 4.341490  | C           | -10.011811 | -4.230330 | -4.844670 |
| C  | -6.719747  | -1.134565 | 5.602102  | H           | -7.268775  | -2.934241 | -3.415036 |
| C  | -7.680304  | -0.819057 | 6.610185  | C           | -8.590639  | -4.156075 | -4.751046 |
| C  | -5.345215  | -0.903757 | 5.918315  | H           | -10.565699 | -4.812108 | -5.566730 |
| C  | -7.290173  | -0.314325 | 7.838654  | H           | -7.884928  | -4.676725 | -5.383012 |
| H  | -8.735484  | -0.954858 | 6.409775  | C           | -12.041906 | -3.111963 | -3.605408 |
| C  | -4.968046  | -0.408464 | 7.154117  | H           | -12.211029 | -2.031220 | -3.529841 |
| H  | -4.575047  | -1.135249 | 5.192849  | Fe          | -9.378442  | -2.280296 | -5.168990 |
| C  | -5.934507  | -0.107968 | 8.122903  | C           | -8.237711  | -0.739489 | -5.956841 |
| H  | -8.042826  | -0.076223 | 8.583503  | C           | -8.604621  | -1.658057 | -6.986497 |
| H  | -3.916021  | -0.252834 | 7.371546  | C           | -10.030034 | -1.707297 | -7.047491 |
| H  | -5.633552  | 0.284835  | 9.088888  | C           | -9.437005  | -0.222303 | -5.381059 |
| C  | -8.509597  | -2.034257 | 4.025130  | C           | -10.545249 | -0.820170 | -6.053500 |
| H  | -9.091805  | -2.195604 | 4.931782  | H           | -7.922798  | -2.246262 | -7.584723 |
| H  | -8.522433  | -2.977397 | 3.464602  | H           | -7.229988  | -0.506446 | -5.642199 |
| C  | -8.900235  | -1.120143 | 1.655756  | H           | -9.494882  | 0.468213  | -4.550601 |
| C  | -9.216162  | -0.970964 | 3.142153  | H           | -11.590016 | -0.654157 | -5.828811 |
| O  | -9.589502  | -0.122705 | 0.903086  | H           | -10.616012 | -2.336093 | -7.703292 |
| H  | -9.227593  | -2.117335 | 1.330997  | C           | -12.965426 | -3.690258 | -4.677608 |
| H  | -8.966682  | 0.046038  | 3.469648  | H           | -14.009133 | -3.444982 | -4.464253 |
| H  | -10.294200 | -1.116749 | 3.275699  | H           | -12.880628 | -4.780038 | -4.731135 |
| S  | -6.080287  | -3.324082 | 0.988077  | H           | -12.713007 | -3.280992 | -5.661638 |
| O  | -5.758499  | -2.795741 | -0.344639 | P           | -12.431286 | -3.730548 | -1.879207 |
| O  | -5.057716  | -4.015192 | 1.787104  | Pd          | -11.171344 | -2.717392 | -0.163987 |
| C  | -7.486318  | -4.402580 | 0.803380  | H           | -12.377170 | -5.128385 | -2.072605 |
| C  | -7.984945  | -5.081985 | 1.918804  | H           | -13.834927 | -3.579106 | -1.843771 |
| C  | -8.075722  | -4.549047 | -0.448502 | H           | -8.292332  | -1.398695 | -1.448732 |



|   |            |           |           |            |            |           |           |
|---|------------|-----------|-----------|------------|------------|-----------|-----------|
| H | -10.029556 | -0.428557 | -2.219717 | C          | -11.248345 | -7.144596 | -0.325648 |
| H | -11.321045 | -1.671930 | 2.253649  | H          | -11.340674 | -7.308931 | -1.402797 |
| I | -12.873388 | -3.891691 | 1.838156  | H          | -11.243434 | -8.120315 | 0.170415  |
| N | -7.091533  | -2.803142 | 2.334925  | H          | -12.140541 | -6.609060 | 0.021384  |
| C | -6.175795  | -2.305159 | 3.376497  |            |            |           |           |
| H | -5.528519  | -3.142960 | 3.661734  | <b>IN5</b> |            |           |           |
| H | -5.530970  | -1.518355 | 2.966486  | C          | -0.583399  | -0.478454 | -0.312877 |
| C | -8.134702  | -1.875323 | 1.877875  | C          | 0.891315   | -0.243279 | -0.119622 |
| H | -8.287000  | -1.997850 | 0.806178  | C          | 1.313869   | 1.077149  | 0.471896  |
| H | -7.819149  | -0.838456 | 2.042490  | C          | 0.436330   | 1.696828  | 1.577969  |
| C | -6.963704  | -1.793706 | 4.553738  | C          | -1.976321  | 0.885924  | 1.280534  |
| C | -6.481329  | -0.701511 | 5.337997  | C          | -0.991029  | 2.058549  | 1.154831  |
| C | -7.292031  | -0.094143 | 6.341931  | H          | -1.001153  | 0.292056  | -0.974845 |
| C | -5.171102  | -0.164300 | 5.168788  | H          | 2.320101   | 0.985868  | 0.885925  |
| C | -6.829103  | 0.967938  | 7.104420  | H          | 0.418261   | 1.044929  | 2.455797  |
| H | -8.301209  | -0.452875 | 6.506129  | H          | -2.303673  | 0.832791  | 2.319609  |
| C | -4.716914  | 0.894753  | 5.941516  | H          | -0.779487  | -1.428044 | -0.807078 |
| H | -4.497730  | -0.599004 | 4.439010  | H          | 0.929125   | 2.627976  | 1.884703  |
| C | -5.538278  | 1.474912  | 6.914880  | H          | -2.864110  | 1.078198  | 0.667726  |
| H | -7.480311  | 1.409288  | 7.853661  | H          | -0.965664  | 2.406068  | 0.108128  |
| H | -3.709505  | 1.271441  | 5.788371  | N          | -1.419842  | -0.416811 | 0.903642  |
| H | -5.178760  | 2.304688  | 7.515303  | S          | -1.079055  | -1.505732 | 2.142403  |
| C | -8.285059  | -2.452619 | 4.840651  | O          | 0.308842   | -1.423985 | 2.630146  |
| H | -8.503242  | -2.410299 | 5.910428  | O          | -2.168391  | -1.353703 | 3.118901  |
| H | -8.224247  | -3.514724 | 4.576966  | C          | -1.242227  | -3.054278 | 1.273256  |
| C | -9.454512  | -2.174514 | 2.582068  | C          | -2.419502  | -3.332345 | 0.572932  |
| C | -9.467273  | -1.818507 | 4.065358  | C          | -0.201454  | -3.977116 | 1.331858  |
| O | -10.460371 | -1.432162 | 1.864178  | C          | -2.537822  | -4.548243 | -0.089524 |
| H | -9.656566  | -3.245388 | 2.470202  | H          | -3.216369  | -2.597357 | 0.536169  |
| H | -9.438280  | -0.728096 | 4.172430  | C          | -0.341812  | -5.196517 | 0.669346  |
| H | -10.413065 | -2.169209 | 4.495543  | H          | 0.706588   | -3.729799 | 1.868421  |
| S | -6.415008  | -3.758960 | 1.126692  | C          | -1.503263  | -5.498939 | -0.050445 |
| O | -6.074336  | -2.964121 | -0.069043 | H          | -3.444347  | -4.768788 | -0.646320 |
| O | -5.365326  | -4.556983 | 1.774682  | H          | 0.469986   | -5.917146 | 0.703350  |
| C | -7.810583  | -4.782289 | 0.699735  | C          | -1.656440  | -6.819380 | -0.759127 |
| C | -8.454962  | -5.530142 | 1.689420  | H          | -2.347218  | -7.475229 | -0.215404 |
| C | -8.234417  | -4.826580 | -0.624380 | H          | -2.065017  | -6.685974 | -1.766121 |
| C | -9.553930  | -6.303649 | 1.338580  | H          | -0.700141  | -7.342039 | -0.843696 |
| H | -8.110622  | -5.490517 | 2.716599  | O          | -1.560621  | 3.075104  | 1.979365  |
| C | -9.335506  | -5.613556 | -0.961372 | H          | -1.046059  | 3.882715  | 1.848524  |
| H | -7.710181  | -4.251600 | -1.375213 | C          | 1.856402   | -1.174951 | -0.622222 |
| C | -10.016488 | -6.351926 | 0.012675  | C          | 1.494465   | -2.461126 | -1.123935 |
| H | -10.074898 | -6.870562 | 2.103803  | C          | 3.249101   | -0.864883 | -0.650470 |
| H | -9.667639  | -5.640191 | -1.994441 | C          | 2.443966   | -3.358073 | -1.589636 |

|                 |           |           |           |            |           |           |           |
|-----------------|-----------|-----------|-----------|------------|-----------|-----------|-----------|
| H               | 0.460051  | -2.776018 | -1.121928 | <b>IN6</b> |           |           |           |
| C               | 4.190463  | -1.766545 | -1.125302 | C          | -0.434263 | -0.145471 | -0.479381 |
| H               | 3.591943  | 0.103197  | -0.307127 | C          | 1.066478  | 0.180205  | -0.430646 |
| C               | 3.802930  | -3.025115 | -1.597593 | C          | 1.507677  | 1.224012  | 0.578502  |
| H               | 2.120545  | -4.331907 | -1.946831 | C          | 0.657021  | 1.531224  | 1.825135  |
| H               | 5.239974  | -1.485607 | -1.129398 | C          | -1.730547 | 0.746564  | 1.468104  |
| H               | 4.542894  | -3.729778 | -1.964064 | C          | -0.788034 | 1.953865  | 1.542767  |
| H               | 1.393778  | 1.816381  | -0.345669 | H          | -0.967590 | 0.704643  | -0.909172 |
|                 |           |           |           | H          | 2.526389  | 1.023205  | 0.905624  |
| <b>·Pd(I)LI</b> |           |           |           | H          | 0.681926  | 0.666809  | 2.496265  |
| P               | -2.340601 | -4.019150 | -2.499339 | H          | -1.987107 | 0.452626  | 2.485907  |
| C               | -1.279649 | -3.877507 | -3.958733 | H          | -0.626751 | -0.973012 | -1.159016 |
| C               | -0.055091 | -3.117164 | -4.018253 | H          | 1.151916  | 2.355997  | 2.349484  |
| C               | -1.584347 | -4.327567 | -5.284609 | H          | -2.655587 | 1.022063  | 0.948739  |
| C               | 0.372869  | -3.111071 | -5.381893 | H          | -0.814737 | 2.502520  | 0.588360  |
| H               | -2.431474 | -4.940046 | -5.560031 | N          | -1.114880 | -0.396329 | 0.794641  |
| C               | -0.563278 | -3.856635 | -6.156271 | S          | -0.830886 | -1.814786 | 1.620290  |
| H               | 1.281004  | -2.660923 | -5.755283 | O          | 0.608971  | -2.049597 | 1.809922  |
| H               | -0.486418 | -4.065714 | -7.214043 | O          | -1.710935 | -1.799529 | 2.797255  |
| C               | 0.612652  | -2.433401 | -2.854882 | C          | -1.410681 | -3.029488 | 0.442881  |
| H               | 0.664895  | -3.135970 | -2.014416 | C          | -2.634276 | -2.838684 | -0.199706 |
| Fe              | 0.249453  | -5.053610 | -4.666236 | C          | -0.639504 | -4.166089 | 0.199527  |
| C               | 1.182653  | -6.652369 | -5.595709 | C          | -3.078767 | -3.794998 | -1.108343 |
| C               | 2.130932  | -5.895676 | -4.843587 | H          | -3.216360 | -1.943526 | -0.009264 |
| C               | 1.715256  | -5.900812 | -3.477243 | C          | -1.098924 | -5.112933 | -0.712956 |
| C               | 0.180477  | -7.125141 | -4.695488 | H          | 0.314813  | -4.283334 | 0.699008  |
| C               | 0.510396  | -6.660353 | -3.386777 | C          | -2.320530 | -4.943318 | -1.380345 |
| H               | 2.991053  | -5.377368 | -5.244072 | H          | -4.026558 | -3.646482 | -1.617422 |
| H               | 1.197124  | -6.803637 | -6.666057 | H          | -0.498565 | -5.996048 | -0.913028 |
| H               | -0.692666 | -7.703869 | -4.963061 | C          | -2.816140 | -5.984753 | -2.349574 |
| H               | -0.068223 | -6.829444 | -2.488660 | H          | -3.300895 | -6.811640 | -1.816115 |
| H               | 2.209642  | -5.393202 | -2.660165 | H          | -3.550710 | -5.569312 | -3.045023 |
| C               | 2.018336  | -1.918829 | -3.165728 | H          | -1.994668 | -6.413428 | -2.931605 |
| H               | 2.477343  | -1.482055 | -2.274968 | O          | -1.327610 | 2.767374  | 2.581504  |
| H               | 2.000332  | -1.151921 | -3.946019 | H          | -0.911560 | 3.637711  | 2.521574  |
| H               | 2.655329  | -2.740526 | -3.510288 | C          | 2.042903  | -0.898191 | -0.775914 |
| P               | -0.542350 | -1.093755 | -2.232577 | C          | 1.631395  | -2.146445 | -1.278779 |
| Pd              | -2.635683 | -1.901329 | -1.528430 | C          | 3.432672  | -0.662891 | -0.713261 |
| H               | -0.483913 | -0.158826 | -3.290399 | C          | 2.553273  | -3.111840 | -1.681151 |
| H               | 0.269381  | -0.417724 | -1.295456 | H          | 0.582259  | -2.390999 | -1.347816 |
| H               | -3.395470 | -4.799442 | -3.022130 | C          | 4.353071  | -1.622226 | -1.122691 |
| H               | -1.719990 | -5.018471 | -1.716277 | H          | 3.807842  | 0.294611  | -0.370466 |
| I               | -3.598297 | 0.310908  | -0.255105 | C          | 3.921935  | -2.859140 | -1.608310 |
|                 |           |           |           | H          | 2.191621  | -4.068900 | -2.046844 |

|            |           |           |           |   |           |           |           |
|------------|-----------|-----------|-----------|---|-----------|-----------|-----------|
| H          | 5.414397  | -1.399883 | -1.063416 | H | -0.923482 | 0.494500  | -1.085447 |
| H          | 4.640829  | -3.609336 | -1.922553 | H | 2.550967  | 0.811015  | 0.871265  |
| H          | 1.599851  | 2.238531  | 0.056377  | H | 0.589791  | 0.772594  | 2.504570  |
| P          | 1.028015  | 0.403771  | -3.696217 | H | -2.058786 | 0.632022  | 2.318559  |
| C          | -0.626052 | -0.265456 | -3.925156 | H | -0.613193 | -1.208138 | -1.114190 |
| C          | -1.801418 | 0.531120  | -4.165755 | H | 1.197064  | 2.371190  | 2.096560  |
| C          | -1.021790 | -1.643781 | -3.848276 | H | -2.653749 | 1.124080  | 0.726371  |
| C          | -2.905037 | -0.371294 | -4.254892 | H | -0.679767 | 2.405891  | 0.274272  |
| H          | -0.359996 | -2.483959 | -3.696983 | N | -1.222064 | -0.408180 | 0.717295  |
| C          | -2.428492 | -1.701149 | -4.058590 | S | -0.988648 | -1.754506 | 1.675315  |
| H          | -3.924468 | -0.093185 | -4.481036 | O | 0.441566  | -1.999144 | 1.926103  |
| H          | -3.022318 | -2.602429 | -4.106628 | O | -1.900408 | -1.621978 | 2.819585  |
| C          | -1.845779 | 2.031447  | -4.223488 | C | -1.549230 | -3.048464 | 0.575492  |
| H          | -0.852881 | 2.408536  | -4.491862 | C | -2.744211 | -2.890052 | -0.130532 |
| Fe         | -1.472362 | -0.843446 | -5.689274 | C | -0.786762 | -4.208139 | 0.449243  |
| C          | -2.050147 | -1.871577 | -7.395655 | C | -3.162497 | -3.902438 | -0.986673 |
| C          | -2.257762 | -0.469954 | -7.569125 | H | -3.321030 | -1.977702 | -0.025690 |
| C          | -0.997577 | 0.185257  | -7.422160 | C | -1.223013 | -5.214983 | -0.411502 |
| C          | -0.661598 | -2.083735 | -7.140416 | H | 0.141929  | -4.303138 | 0.999653  |
| C          | -0.012229 | -0.813068 | -7.156192 | C | -2.407661 | -5.076260 | -1.145165 |
| H          | -3.208940 | 0.013018  | -7.743589 | H | -4.087214 | -3.782195 | -1.544048 |
| H          | -2.816684 | -2.633842 | -7.414026 | H | -0.630815 | -6.119209 | -0.518012 |
| H          | -0.191146 | -3.034546 | -6.931337 | C | -2.857916 | -6.146693 | -2.104719 |
| H          | 1.036272  | -0.632791 | -6.962625 | H | -3.928074 | -6.351136 | -1.998474 |
| H          | -0.822655 | 1.250906  | -7.469290 | H | -2.690495 | -5.835802 | -3.143554 |
| C          | -2.872482 | 2.582108  | -5.214054 | H | -2.314141 | -7.081697 | -1.947529 |
| H          | -2.844235 | 3.674839  | -5.229265 | O | -1.271641 | 2.934605  | 2.192967  |
| H          | -3.889384 | 2.278180  | -4.946758 | H | -0.838427 | 3.779107  | 2.009802  |
| H          | -2.665924 | 2.216500  | -6.224591 | C | 2.028442  | -1.042946 | -0.912992 |
| P          | -2.100129 | 2.659792  | -2.452875 | C | 1.624854  | -2.334674 | -1.281601 |
| Pd         | 1.319998  | 1.715377  | -1.871479 | C | 3.386280  | -0.710321 | -1.093054 |
| H          | -3.520441 | 2.530999  | -2.443479 | C | 2.534272  | -3.255854 | -1.806741 |
| H          | -2.109380 | 4.048355  | -2.745721 | H | 0.602448  | -2.654463 | -1.144178 |
| H          | 1.819977  | -0.757354 | -3.785605 | C | 4.290790  | -1.625326 | -1.619802 |
| H          | 1.315925  | 1.028069  | -4.924241 | H | 3.729961  | 0.291737  | -0.857302 |
| I          | 1.694729  | 4.153592  | -3.126987 | C | 3.870772  | -2.908467 | -1.984014 |
|            |           |           |           | H | 2.186026  | -4.250842 | -2.069249 |
|            |           |           |           | H | 5.327318  | -1.331411 | -1.755682 |
|            |           |           |           | H | 4.576897  | -3.621223 | -2.398606 |
|            |           |           |           | H | 1.793787  | 2.522463  | -0.186228 |
|            |           |           |           | P | 1.064871  | 0.680844  | -3.622825 |
|            |           |           |           | C | -0.525560 | -0.130597 | -3.890761 |
|            |           |           |           | C | -1.768603 | 0.560128  | -4.111237 |
|            |           |           |           | C | -0.795771 | -1.538124 | -3.837728 |
| <b>TS4</b> |           |           |           |   |           |           |           |
| C          | -0.451366 | -0.311291 | -0.521191 |   |           |           |           |
| C          | 1.055370  | -0.038308 | -0.368984 |   |           |           |           |
| C          | 1.502909  | 0.889675  | 0.600213  |   |           |           |           |
| C          | 0.656929  | 1.509813  | 1.692884  |   |           |           |           |
| C          | -1.761080 | 0.828303  | 1.288092  |   |           |           |           |
| C          | -0.744492 | 1.974139  | 1.282807  |   |           |           |           |

|             |           |           |           |   |           |           |           |
|-------------|-----------|-----------|-----------|---|-----------|-----------|-----------|
| C           | -2.790177 | -0.435094 | -4.208114 | H | -0.262783 | 2.584057  | 0.094187  |
| H           | -0.055955 | -2.313944 | -3.704457 | N | -0.976936 | -0.173029 | 0.589324  |
| C           | -2.194163 | -1.719988 | -4.038812 | S | -0.916123 | -1.441780 | 1.713110  |
| H           | -3.832561 | -0.246025 | -4.421456 | O | 0.449039  | -1.609446 | 2.237327  |
| H           | -2.705609 | -2.670101 | -4.099597 | O | -2.030462 | -1.222264 | 2.641063  |
| C           | -1.940996 | 2.052278  | -4.136766 | C | -1.256836 | -2.828624 | 0.647276  |
| H           | -0.988238 | 2.513175  | -4.421392 | C | -2.510330 | -2.918234 | 0.034584  |
| Fe          | -1.335294 | -0.749879 | -5.659801 | C | -0.264147 | -3.777008 | 0.413800  |
| C           | -1.825608 | -1.789412 | -7.386696 | C | -2.761144 | -3.979392 | -0.825884 |
| C           | -2.157165 | -0.408358 | -7.530394 | H | -3.267545 | -2.165225 | 0.224400  |
| C           | -0.959091 | 0.352291  | -7.369851 | C | -0.535904 | -4.835723 | -0.452747 |
| C           | -0.422893 | -1.883062 | -7.137658 | H | 0.701032  | -3.676543 | 0.896264  |
| C           | 0.111495  | -0.560046 | -7.126280 | C | -1.779954 | -4.952762 | -1.083361 |
| H           | -3.147968 | -0.007691 | -7.692721 | H | -3.730313 | -4.057018 | -1.310263 |
| H           | -2.521673 | -2.616158 | -7.419952 | H | 0.233049  | -5.578090 | -0.644864 |
| H           | 0.129995  | -2.792634 | -6.948034 | C | -2.075393 | -6.099559 | -2.013873 |
| H           | 1.139837  | -0.292045 | -6.926335 | H | -2.810310 | -6.781877 | -1.570423 |
| H           | -0.878814 | 1.429956  | -7.394055 | H | -2.497342 | -5.743235 | -2.959484 |
| C           | -3.032831 | 2.537426  | -5.091560 | H | -1.174757 | -6.677078 | -2.237072 |
| H           | -3.097620 | 3.628766  | -5.079963 | O | -1.058286 | 3.315103  | 1.852086  |
| H           | -4.013898 | 2.143369  | -4.808547 | H | -1.368252 | 3.975575  | 1.211093  |
| H           | -2.822102 | 2.214104  | -6.115887 | C | 2.398865  | -0.444572 | -1.151404 |
| P           | -2.200465 | 2.607962  | -2.343632 | C | 2.104270  | -1.144446 | -2.340819 |
| Pd          | 1.427239  | 1.820982  | -1.542015 | C | 3.745733  | -0.372386 | -0.757790 |
| H           | -3.610582 | 2.402056  | -2.315259 | C | 3.109604  | -1.741730 | -3.093205 |
| H           | -2.294905 | 4.004035  | -2.586500 | H | 1.084724  | -1.190291 | -2.707014 |
| H           | 1.952440  | -0.374414 | -3.916552 | C | 4.753940  | -0.974438 | -1.514542 |
| H           | 1.217440  | 1.453656  | -4.791456 | H | 4.024271  | 0.146285  | 0.150099  |
| I           | 1.746406  | 4.264995  | -2.677255 | C | 4.444499  | -1.660088 | -2.686503 |
|             |           |           |           | H | 2.848722  | -2.265580 | -4.007838 |
| <b>TS4'</b> |           |           |           | H | 5.783882  | -0.903162 | -1.177616 |
| C           | 0.014572  | -0.297542 | -0.436788 | H | 5.228580  | -2.122818 | -3.277579 |
| C           | 1.329551  | 0.216222  | -0.339829 | H | 2.471435  | 1.819306  | 0.448736  |
| C           | 1.795047  | 1.054286  | 0.842162  | P | 2.198826  | 2.580193  | -2.778005 |
| C           | 0.766375  | 1.722356  | 1.778912  | C | 2.779038  | 4.268873  | -2.450036 |
| C           | -1.552924 | 1.120510  | 0.980580  | C | 2.388570  | 5.133426  | -1.363002 |
| C           | -0.506243 | 2.234742  | 1.106665  | C | 3.743850  | 4.972268  | -3.248213 |
| H           | -1.028425 | 0.570207  | -1.648145 | C | 3.122865  | 6.348379  | -1.506656 |
| H           | 2.412721  | 0.394319  | 1.462086  | H | 4.242065  | 4.579579  | -4.123566 |
| H           | 0.500420  | 1.032901  | 2.585206  | C | 3.951763  | 6.250896  | -2.662614 |
| H           | -2.040005 | 0.985757  | 1.946402  | H | 3.086144  | 7.185947  | -0.825039 |
| H           | -0.117061 | -1.201888 | -1.022681 | H | 4.650555  | 7.000251  | -3.007752 |
| H           | 1.256411  | 2.577478  | 2.252008  | C | 1.379680  | 4.817785  | -0.306814 |
| H           | -2.315069 | 1.395037  | 0.242631  | H | 1.362544  | 3.734318  | -0.181031 |

|           |           |           |           |            |           |           |           |
|-----------|-----------|-----------|-----------|------------|-----------|-----------|-----------|
| Fe        | 4.427557  | 4.742318  | -1.319437 | C          | 0.380090  | -3.225268 | 1.226012  |
| C         | 6.372840  | 5.084703  | -0.688590 | C          | -1.796093 | -4.541196 | 0.071125  |
| C         | 5.501947  | 4.979036  | 0.436930  | H          | -3.009826 | -2.977711 | 0.936204  |
| C         | 4.891577  | 3.688640  | 0.403721  | C          | 0.577128  | -4.384975 | 0.479714  |
| C         | 6.301627  | 3.859442  | -1.418569 | H          | 1.214270  | -2.696690 | 1.669403  |
| C         | 5.386260  | 2.998325  | -0.744617 | C          | -0.501778 | -5.057087 | -0.107756 |
| H         | 5.309930  | 5.754875  | 1.164945  | H          | -2.641652 | -5.054862 | -0.377731 |
| H         | 6.950258  | 5.956253  | -0.964162 | H          | 1.585838  | -4.762134 | 0.340678  |
| H         | 6.817146  | 3.639481  | -2.343092 | C          | -0.285206 | -6.321430 | -0.897353 |
| H         | 5.091538  | 2.010237  | -1.067942 | H          | -0.460200 | -7.205119 | -0.271109 |
| H         | 4.167130  | 3.309877  | 1.110570  | H          | -0.972467 | -6.385516 | -1.746510 |
| C         | 1.658712  | 5.459735  | 1.057280  | H          | 0.738252  | -6.384897 | -1.276896 |
| H         | 0.912606  | 5.132093  | 1.786210  | O          | -1.759962 | 3.413093  | 1.717546  |
| H         | 1.623538  | 6.552674  | 1.003254  | H          | -1.273002 | 4.218560  | 1.497931  |
| H         | 2.649850  | 5.174749  | 1.420046  | C          | 1.850168  | -0.691408 | -0.645641 |
| P         | -0.386510 | 5.262428  | -0.817914 | C          | 1.638677  | -1.232727 | -1.925234 |
| Pd        | 0.242553  | 1.435186  | -1.925152 | C          | 3.025181  | -1.051204 | 0.037630  |
| H         | -0.336245 | 4.887406  | -2.181143 | C          | 2.569437  | -2.095036 | -2.503202 |
| H         | -0.161755 | 6.646994  | -1.044885 | H          | 0.742993  | -0.970819 | -2.480661 |
| H         | 2.090958  | 2.611321  | -4.182745 | C          | 3.956746  | -1.911261 | -0.540011 |
| H         | 3.381464  | 1.818358  | -2.675261 | H          | 3.184468  | -0.680203 | 1.045031  |
| I         | -1.416602 | 2.396156  | -3.850135 | C          | 3.732284  | -2.440108 | -1.813007 |
|           |           |           |           | H          | 2.385424  | -2.497138 | -3.495336 |
| <b>2a</b> |           |           |           | H          | 4.851799  | -2.182679 | 0.012488  |
| C         | -0.622654 | -0.232248 | -0.233219 | H          | 4.453711  | -3.117786 | -2.259682 |
| C         | 0.830739  | 0.173735  | -0.001209 |            |           |           |           |
| C         | 1.186919  | 1.190009  | 0.800855  | <b>TS5</b> |           |           |           |
| C         | 0.295564  | 2.087862  | 1.616011  | C          | 0.106685  | -0.364788 | -0.550251 |
| C         | -2.069619 | 1.140867  | 1.282426  | C          | 1.289205  | 0.363518  | 0.066079  |
| C         | -1.116198 | 2.321849  | 1.063492  | C          | 1.132889  | 1.468392  | 0.847153  |
| H         | -1.100643 | 0.394555  | -0.994038 | C          | -0.159367 | 2.060646  | 1.344828  |
| H         | 2.251352  | 1.382413  | 0.916433  | C          | -2.027605 | 0.698618  | 0.245714  |
| H         | 0.226241  | 1.693653  | 2.639358  | C          | -1.316446 | 2.052695  | 0.337058  |
| H         | -2.372151 | 1.133149  | 2.331570  | H          | -0.193321 | 0.123481  | -1.486560 |
| H         | -0.651667 | -1.250593 | -0.621564 | H          | 2.022469  | 1.852245  | 1.337532  |
| H         | 0.782073  | 3.068542  | 1.699428  | H          | -0.464420 | 1.546728  | 2.266708  |
| H         | -2.976572 | 1.295362  | 0.687139  | H          | -2.704910 | 0.605304  | 1.095469  |
| H         | -1.034050 | 2.528550  | -0.015150 | H          | 0.393670  | -1.377662 | -0.836268 |
| N         | -1.498475 | -0.167684 | 0.941954  | H          | 0.028689  | 3.103983  | 1.614921  |
| S         | -1.164641 | -1.196420 | 2.244590  | H          | -2.635405 | 0.660568  | -0.665964 |
| O         | 0.086815  | -0.872423 | 2.951087  | H          | -0.887870 | 2.304035  | -0.653557 |
| O         | -2.406193 | -1.244453 | 3.030678  | N          | -1.114541 | -0.448500 | 0.252304  |
| C         | -0.914083 | -2.731081 | 1.375540  | S          | -1.073302 | -1.446177 | 1.603803  |
| C         | -2.011634 | -3.381438 | 0.807406  | O          | 0.041473  | -1.142570 | 2.514685  |

|    |           |           |           |             |            |           |           |
|----|-----------|-----------|-----------|-------------|------------|-----------|-----------|
| O  | -2.441929 | -1.459346 | 2.138807  | C           | 3.962982   | -0.725978 | -5.695792 |
| C  | -0.705023 | -3.013965 | 0.829547  | C           | 4.289001   | -0.393645 | -4.345897 |
| C  | -1.587216 | -3.529256 | -0.123550 | H           | 6.755987   | 1.095530  | -6.064664 |
| C  | 0.444611  | -3.707715 | 1.198450  | H           | 4.975579   | -0.198065 | -7.624854 |
| C  | -1.299060 | -4.752210 | -0.717314 | H           | 3.093933   | -1.280714 | -6.021611 |
| H  | -2.475799 | -2.971810 | -0.399689 | H           | 3.717986   | -0.649675 | -3.464491 |
| C  | 0.717670  | -4.934877 | 0.592737  | H           | 5.967769   | 0.809696  | -3.494272 |
| H  | 1.112232  | -3.283397 | 1.939296  | C           | 5.516179   | 4.194862  | -3.276348 |
| C  | -0.144661 | -5.473990 | -0.369178 | H           | 5.879376   | 4.462321  | -2.280482 |
| H  | -1.977687 | -5.158145 | -1.462359 | H           | 5.536976   | 5.096440  | -3.896131 |
| H  | 1.614719  | -5.479247 | 0.872972  | H           | 6.211154   | 3.467631  | -3.709441 |
| C  | 0.139270  | -6.808599 | -1.007603 | P           | 2.857174   | 4.776342  | -2.460735 |
| H  | -0.516181 | -7.584314 | -0.593336 | Pd          | 0.832963   | 3.669451  | -1.890307 |
| H  | -0.039230 | -6.779772 | -2.087385 | H           | 2.933066   | 5.873018  | -3.351257 |
| H  | 1.172410  | -7.123521 | -0.838980 | H           | 3.549673   | 5.322583  | -1.360945 |
| O  | -2.326868 | 2.983595  | 0.670233  | H           | 0.266942   | 1.147211  | -4.124544 |
| H  | -1.969465 | 3.869999  | 0.489517  | H           | 1.878357   | 0.744986  | -2.770646 |
| C  | 2.641529  | -0.096166 | -0.306375 | I           | -0.429734  | 5.848023  | -0.699929 |
| C  | 2.935099  | -1.452458 | -0.557250 |             |            |           |           |
| C  | 3.702873  | 0.828640  | -0.417861 | <b>TS2t</b> |            |           |           |
| C  | 4.228279  | -1.863896 | -0.875822 | P           | -10.003338 | -1.716370 | -1.843040 |
| H  | 2.161660  | -2.205886 | -0.457697 | C           | -9.860874  | -2.890316 | -3.223046 |
| C  | 4.994123  | 0.414174  | -0.734244 | C           | -10.973643 | -3.592238 | -3.838859 |
| H  | 3.496611  | 1.882633  | -0.268814 | C           | -8.663661  | -3.440608 | -3.757971 |
| C  | 5.267660  | -0.936049 | -0.964936 | C           | -10.439125 | -4.603648 | -4.679673 |
| H  | 4.425642  | -2.918413 | -1.045741 | H           | -7.655209  | -3.143315 | -3.504195 |
| H  | 5.790434  | 1.150482  | -0.803517 | C           | -9.030310  | -4.461117 | -4.695588 |
| H  | 6.273050  | -1.259511 | -1.215510 | H           | -11.013980 | -5.262787 | -5.314725 |
| H  | 1.496302  | 2.907891  | -0.507296 | H           | -8.338189  | -5.051735 | -5.281323 |
| P  | 1.249661  | 1.845703  | -3.385597 | C           | -12.429749 | -3.348196 | -3.542696 |
| C  | 2.384729  | 2.326462  | -4.705575 | H           | -12.593941 | -2.265454 | -3.491596 |
| C  | 3.576674  | 3.117389  | -4.520660 | Fe          | -9.754211  | -2.444848 | -5.334169 |
| C  | 2.213318  | 2.105610  | -6.111285 | C           | -9.084095  | -0.288571 | -5.930795 |
| C  | 4.120214  | 3.370855  | -5.817831 | C           | -8.542725  | -1.274892 | -6.792851 |
| H  | 1.421408  | 1.525518  | -6.563643 | C           | -9.624970  | -1.950438 | -7.455956 |
| C  | 3.286151  | 2.746757  | -6.791124 | C           | -10.492738 | -0.438023 | -5.951559 |
| H  | 5.037712  | 3.902337  | -6.023323 | C           | -10.834486 | -1.433031 | -6.933659 |
| H  | 3.462716  | 2.727133  | -7.857381 | H           | -7.490167  | -1.459801 | -6.964675 |
| C  | 4.111270  | 3.596698  | -3.197476 | H           | -8.521589  | 0.359307  | -5.271986 |
| H  | 4.115981  | 2.755304  | -2.495745 | H           | -11.201393 | 0.133878  | -5.366289 |
| Fe | 4.011534  | 1.329285  | -5.456637 | H           | -11.837302 | -1.722096 | -7.217256 |
| C  | 4.960447  | -0.155825 | -6.544548 | H           | -9.522254  | -2.717719 | -8.211360 |
| C  | 5.902173  | 0.529235  | -5.719173 | C           | -13.375333 | -3.948689 | -4.582393 |
| C  | 5.487430  | 0.380000  | -4.360940 | H           | -14.412613 | -3.686653 | -4.356796 |

|    |            |           |           |   |            |           |           |
|----|------------|-----------|-----------|---|------------|-----------|-----------|
| H  | -13.306312 | -5.040979 | -4.601802 | H | -5.999403  | 1.112676  | 8.757199  |
| H  | -13.138614 | -3.575915 | -5.585680 | C | -8.047501  | -2.783256 | 4.381010  |
| P  | -12.783463 | -3.917442 | -1.773102 | H | -8.743528  | -2.882108 | 5.206104  |
| Pd | -11.364947 | -2.600612 | -0.269803 | H | -8.203359  | -3.438202 | 3.533343  |
| H  | -12.819938 | -5.316834 | -2.028674 | C | -8.711553  | -1.575597 | 1.700644  |
| H  | -14.192280 | -3.740993 | -1.784989 | C | -9.225345  | -1.056437 | 2.953157  |
| H  | -8.622274  | -1.429116 | -1.691074 | O | -9.632921  | -0.559820 | 1.222072  |
| H  | -10.329309 | -0.502661 | -2.501850 | H | -9.071454  | -2.570276 | 1.433967  |
| H  | -10.417524 | -1.113759 | 0.771688  | H | -8.791183  | -0.167376 | 3.395084  |
| I  | -12.208750 | -3.232658 | 2.341444  | H | -10.153697 | -1.465150 | 3.340665  |
| N  | -6.420102  | -2.301911 | 2.033675  | S | -5.805160  | -3.610305 | 1.170759  |
| C  | -5.915522  | -1.946554 | 3.351703  | O | -5.310056  | -3.125465 | -0.124401 |
| H  | -5.097041  | -2.629848 | 3.593591  | O | -4.915129  | -4.315819 | 2.099962  |
| H  | -5.486088  | -0.938667 | 3.299354  | C | -7.250622  | -4.598710 | 0.851900  |
| C  | -7.264210  | -1.347732 | 1.320494  | C | -7.753407  | -5.421243 | 1.864343  |
| H  | -7.141053  | -1.475041 | 0.242830  | C | -7.907497  | -4.479846 | -0.372423 |
| H  | -6.950638  | -0.327016 | 1.567807  | C | -8.943003  | -6.106427 | 1.643790  |
| C  | -6.955592  | -1.993424 | 4.467482  | H | -7.216862  | -5.525139 | 2.800963  |
| C  | -6.693803  | -1.138420 | 5.646291  | C | -9.098020  | -5.175833 | -0.575326 |
| C  | -7.752989  | -0.630329 | 6.420919  | H | -7.491623  | -3.858007 | -1.155034 |
| C  | -5.378492  | -0.803955 | 6.015102  | C | -9.638929  | -5.987324 | 0.430464  |
| C  | -7.504735  | 0.171248  | 7.530998  | H | -9.344818  | -6.743256 | 2.426130  |
| H  | -8.777800  | -0.849222 | 6.138463  | H | -9.607346  | -5.082403 | -1.527924 |
| C  | -5.131743  | -0.006552 | 7.131441  | C | -10.958086 | -6.680627 | 0.241272  |
| H  | -4.538548  | -1.189008 | 5.446638  | H | -11.185839 | -6.828566 | -0.817357 |
| C  | -6.192335  | 0.485431  | 7.892335  | H | -10.973786 | -7.654081 | 0.740700  |
| H  | -8.337286  | 0.559012  | 8.110127  | H | -11.756138 | -6.068713 | 0.678260  |
| H  | -4.108042  | 0.228881  | 7.406091  |   |            |           |           |

### 13. Copies of the NMR Spectra for 7-Endo Heck-Type Products

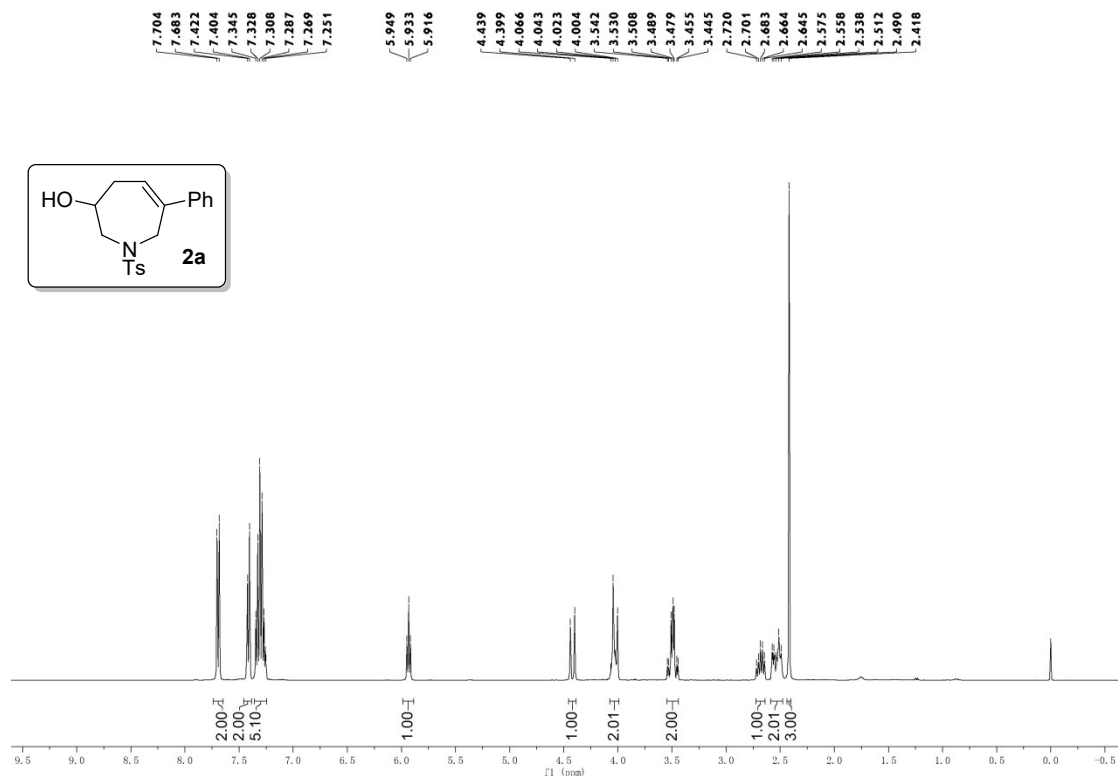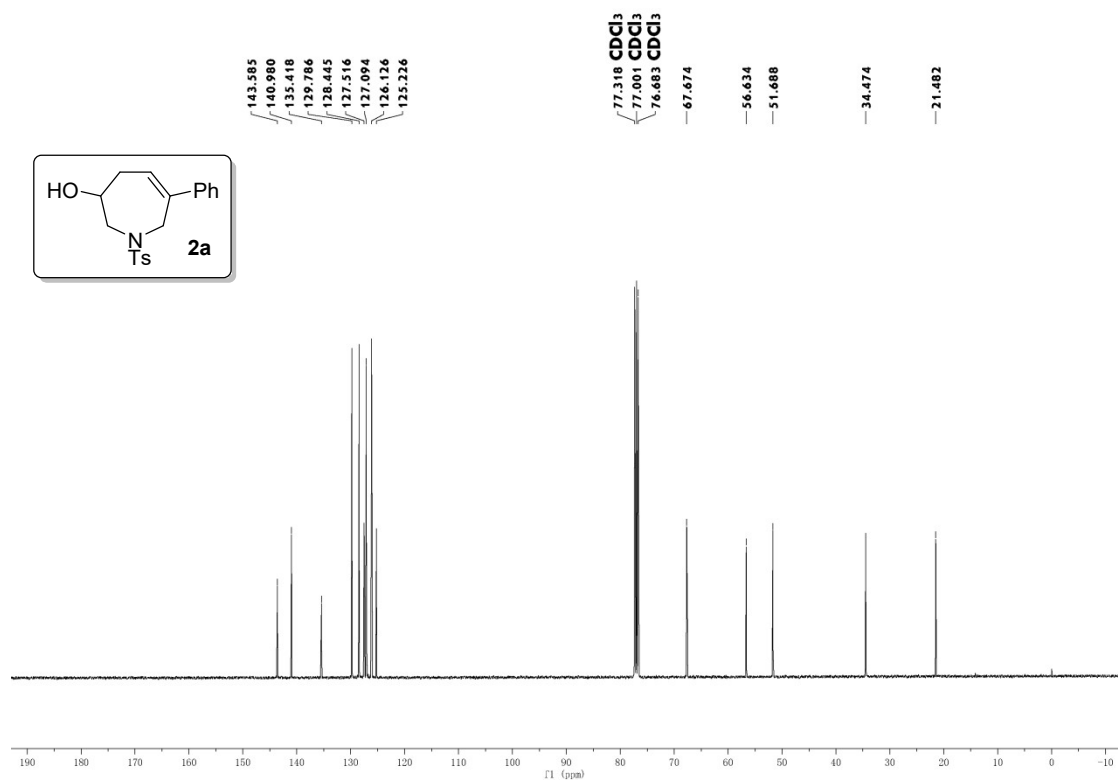



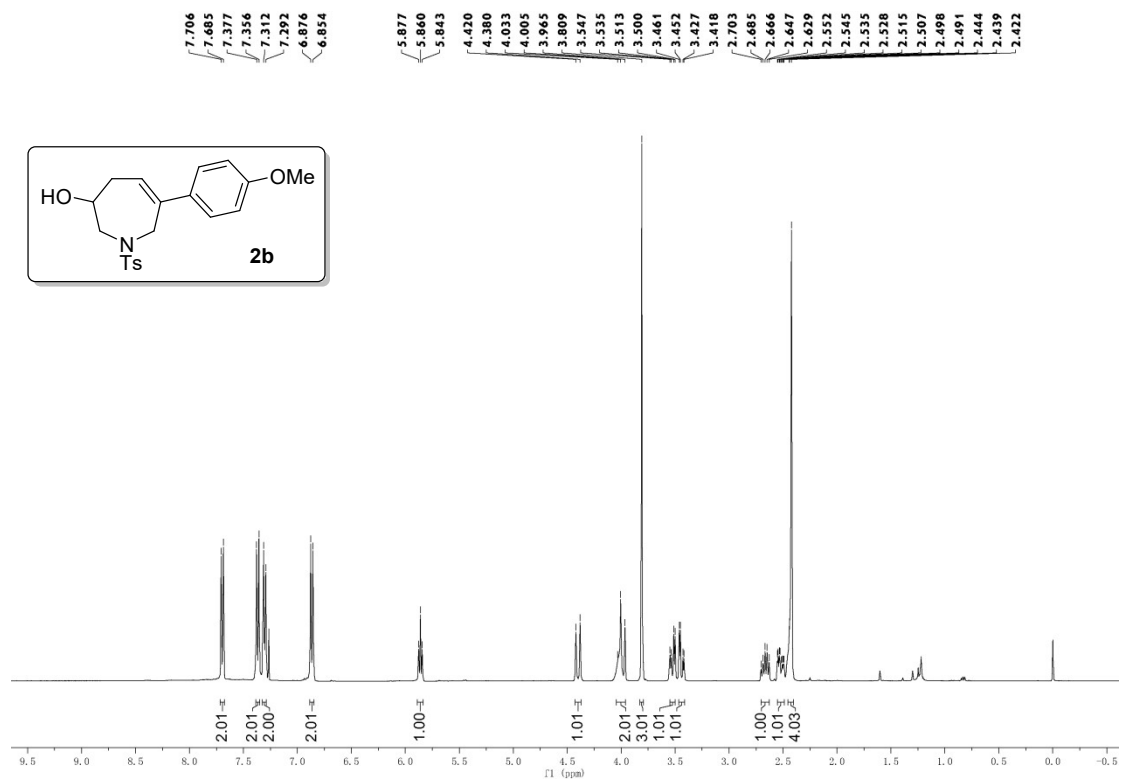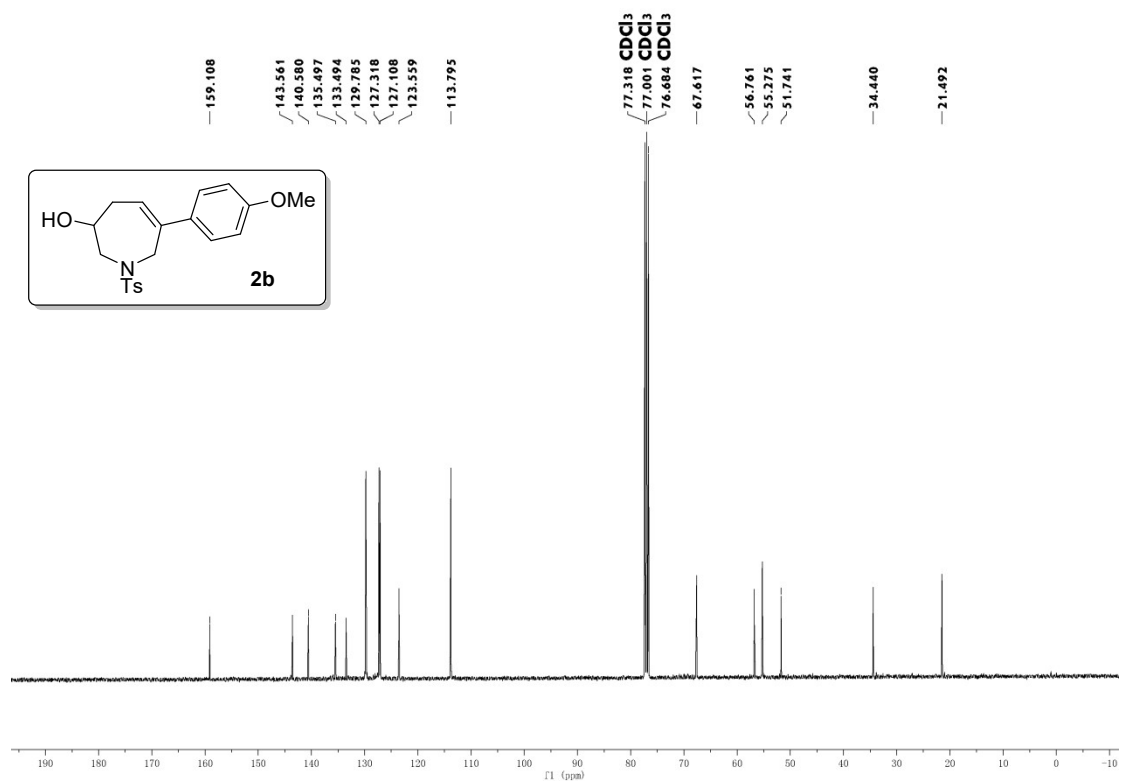

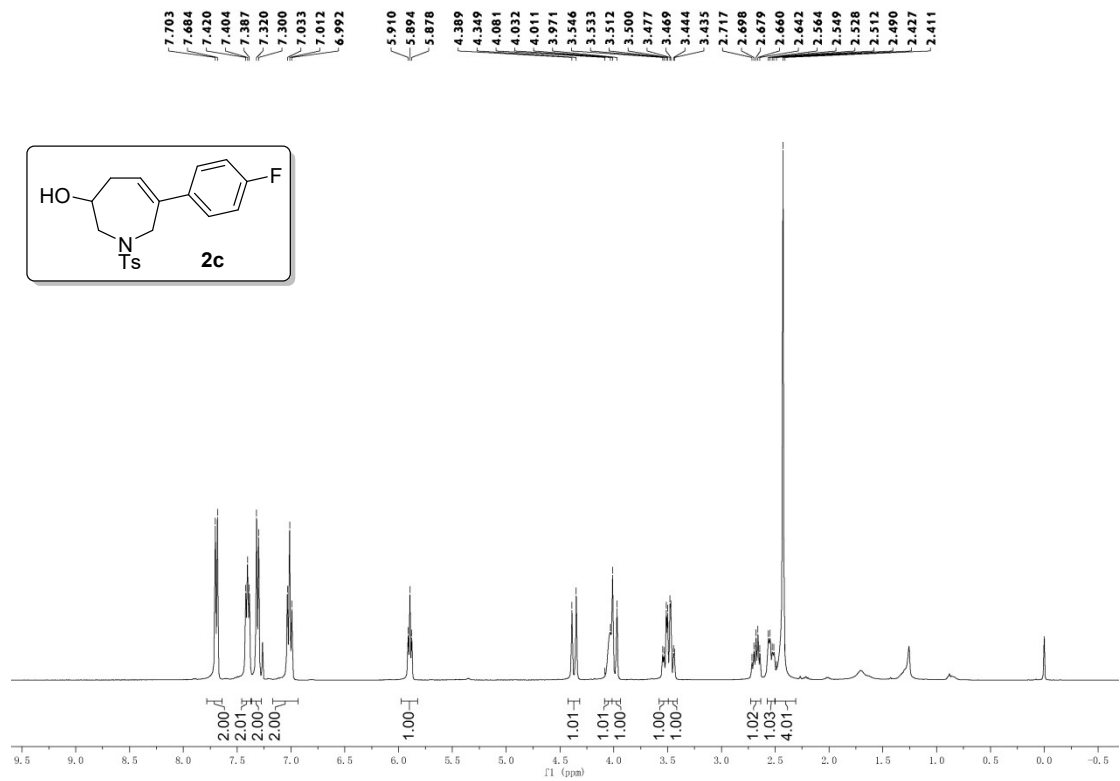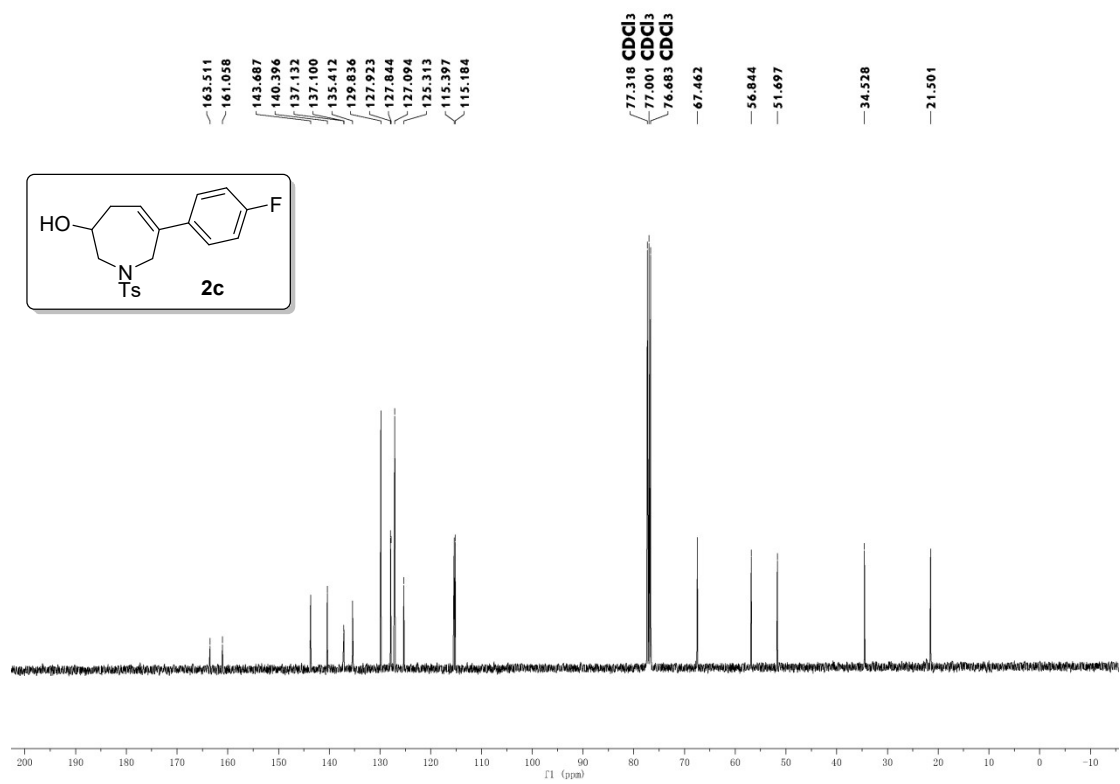

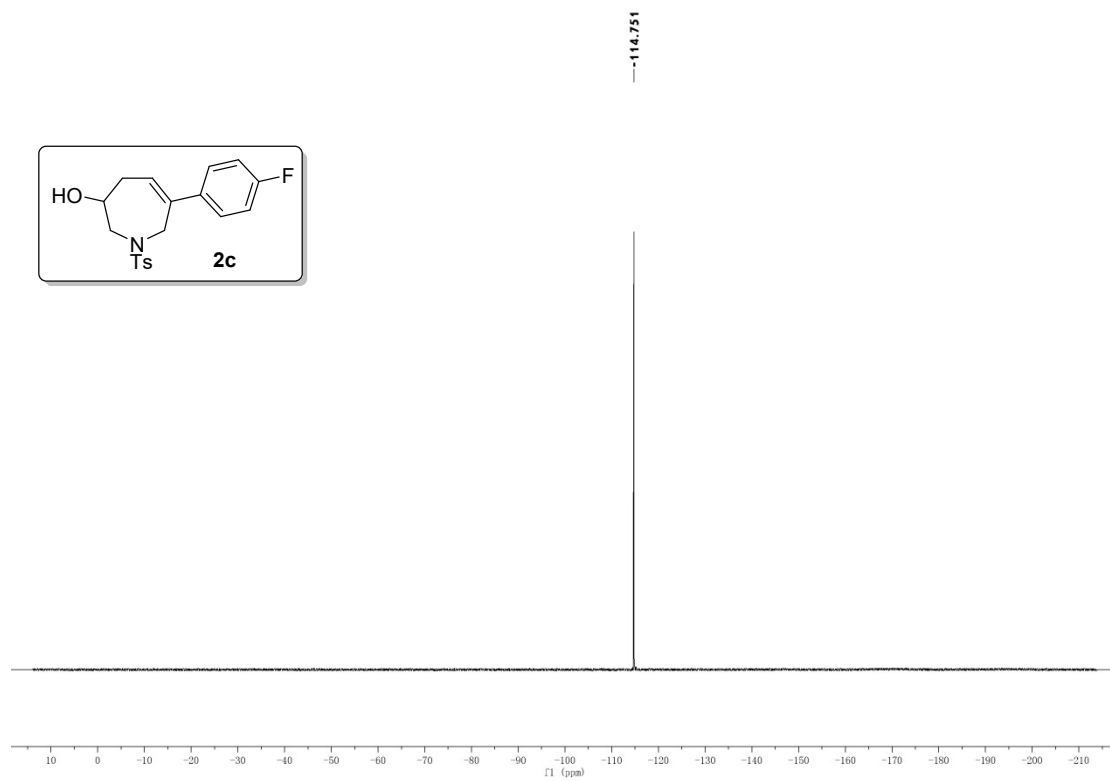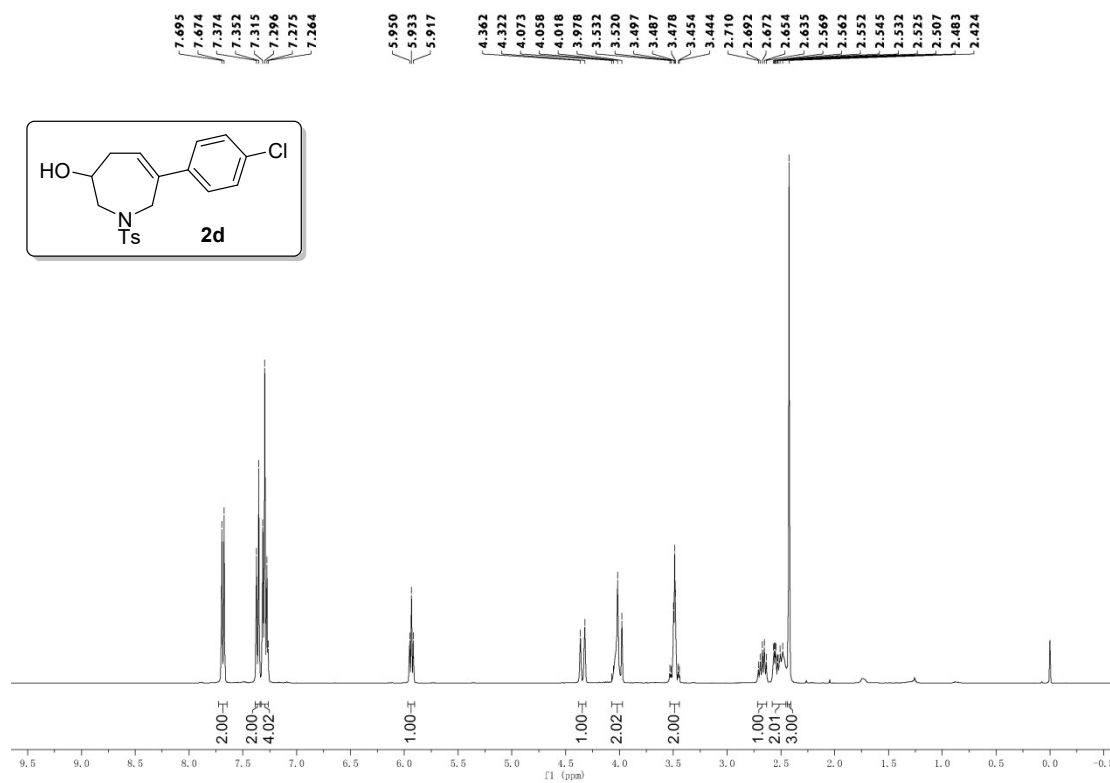

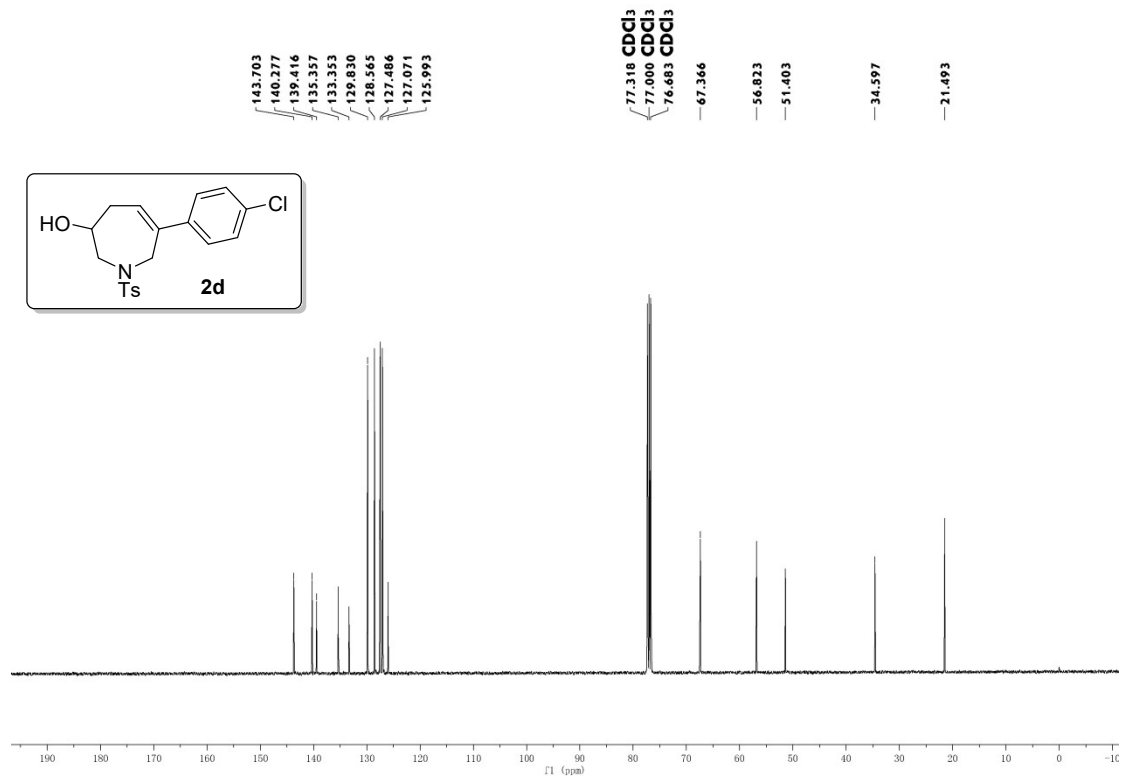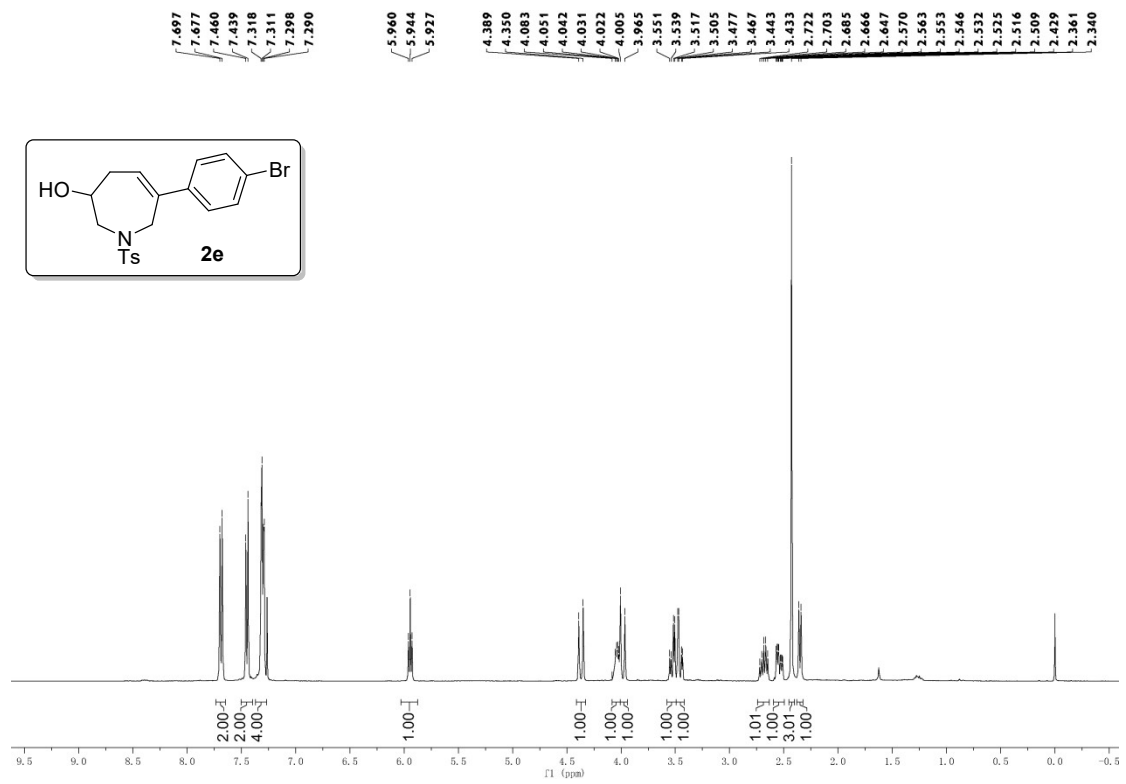

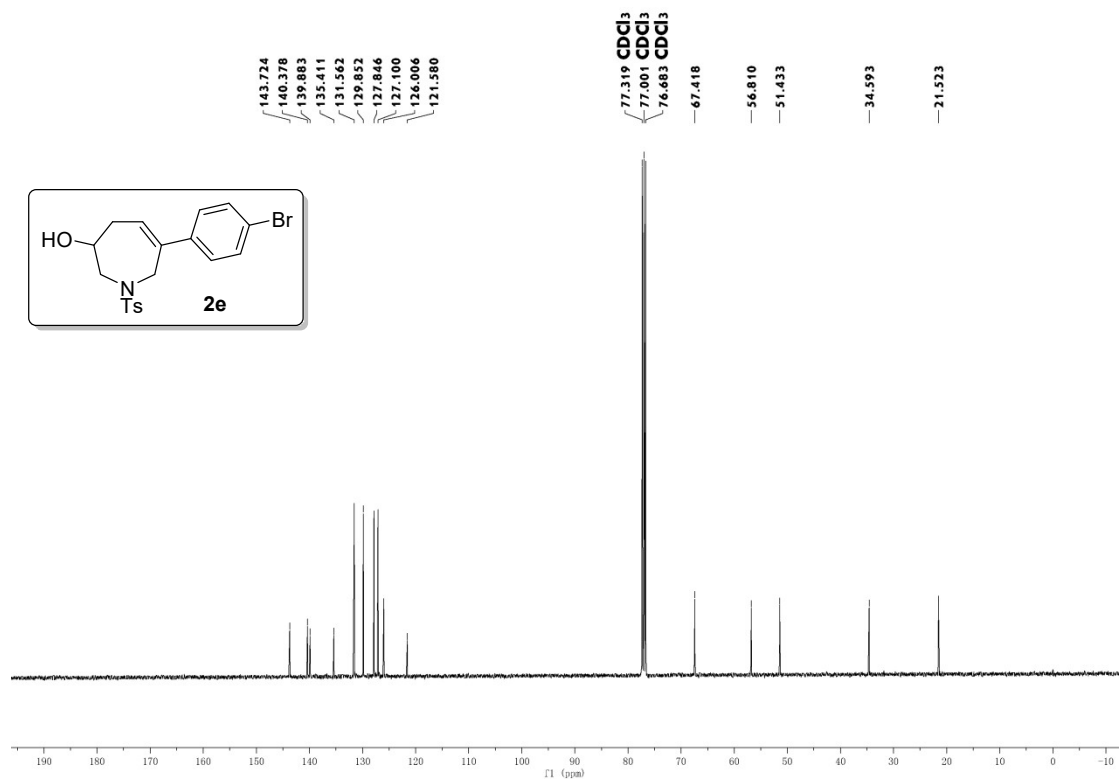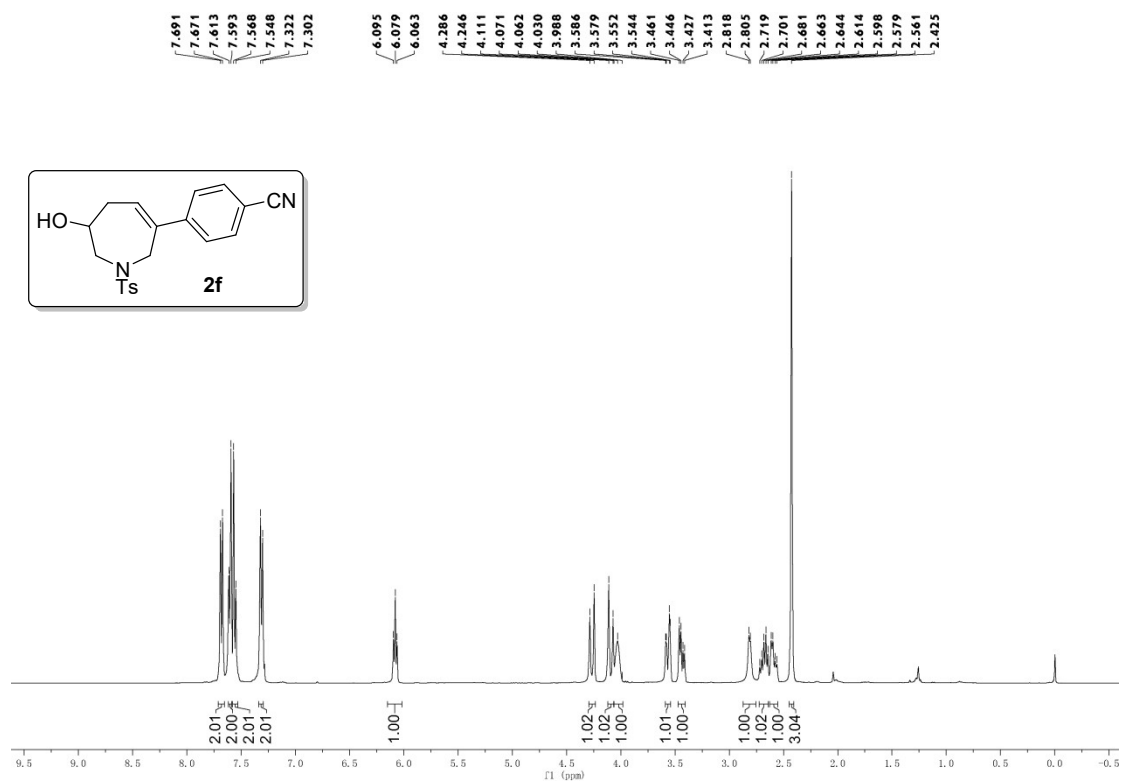



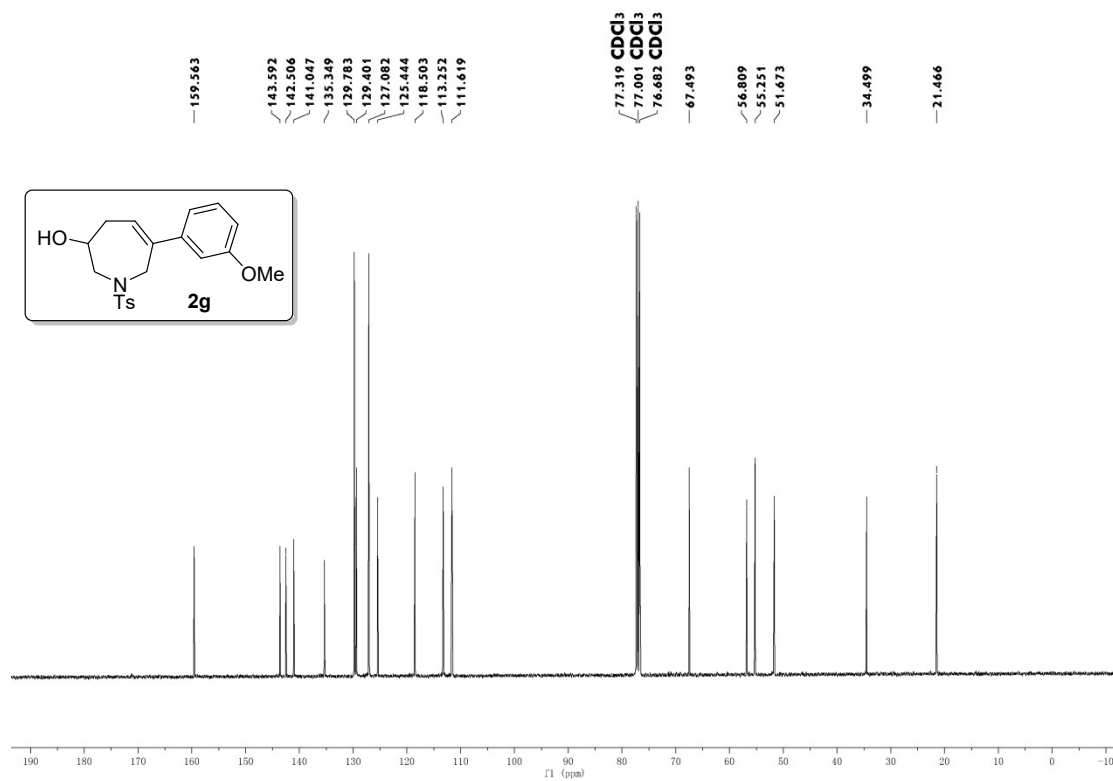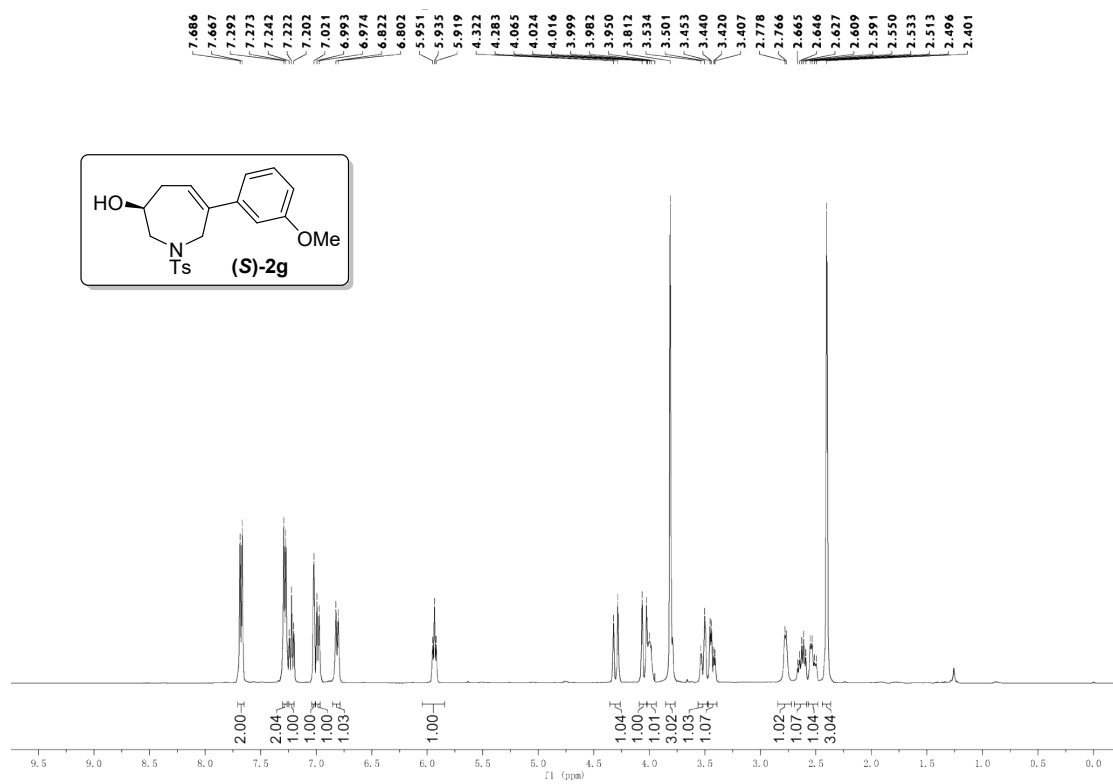

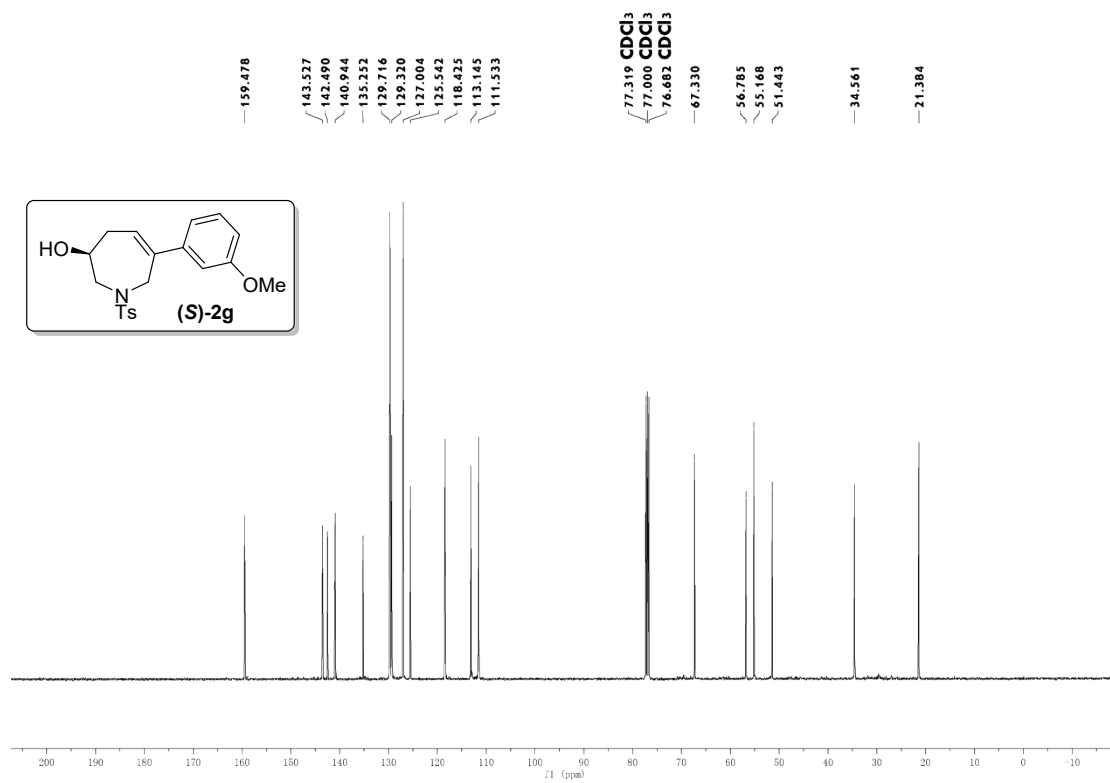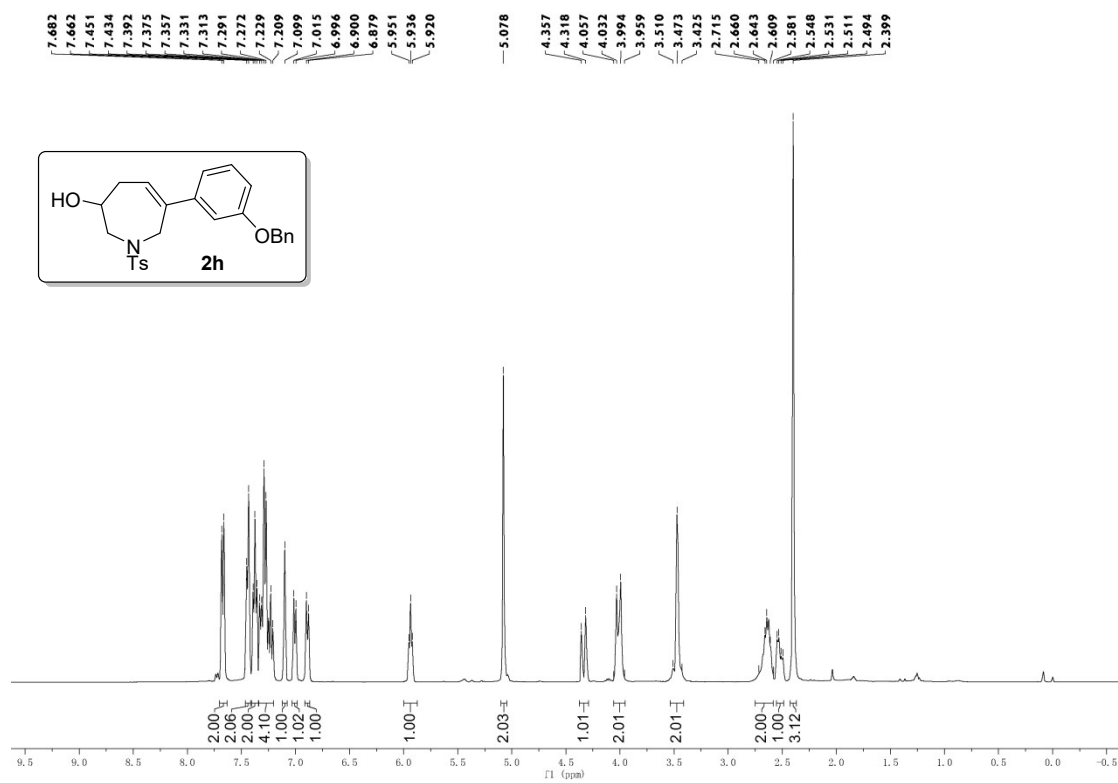



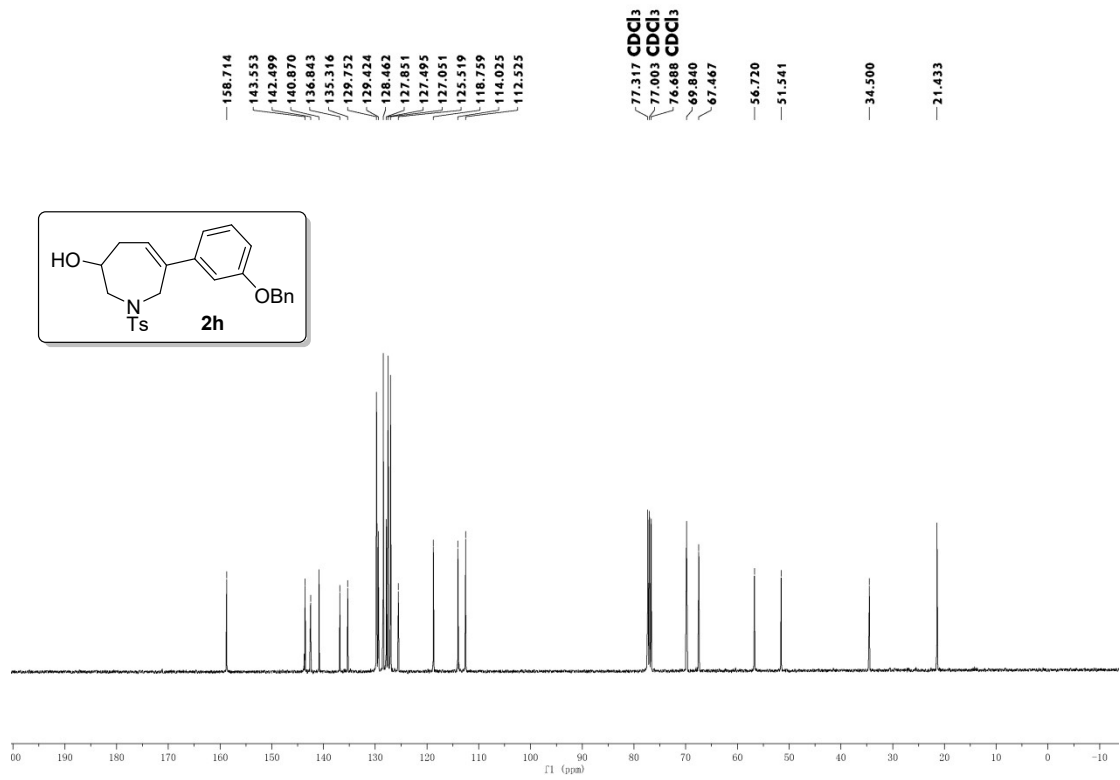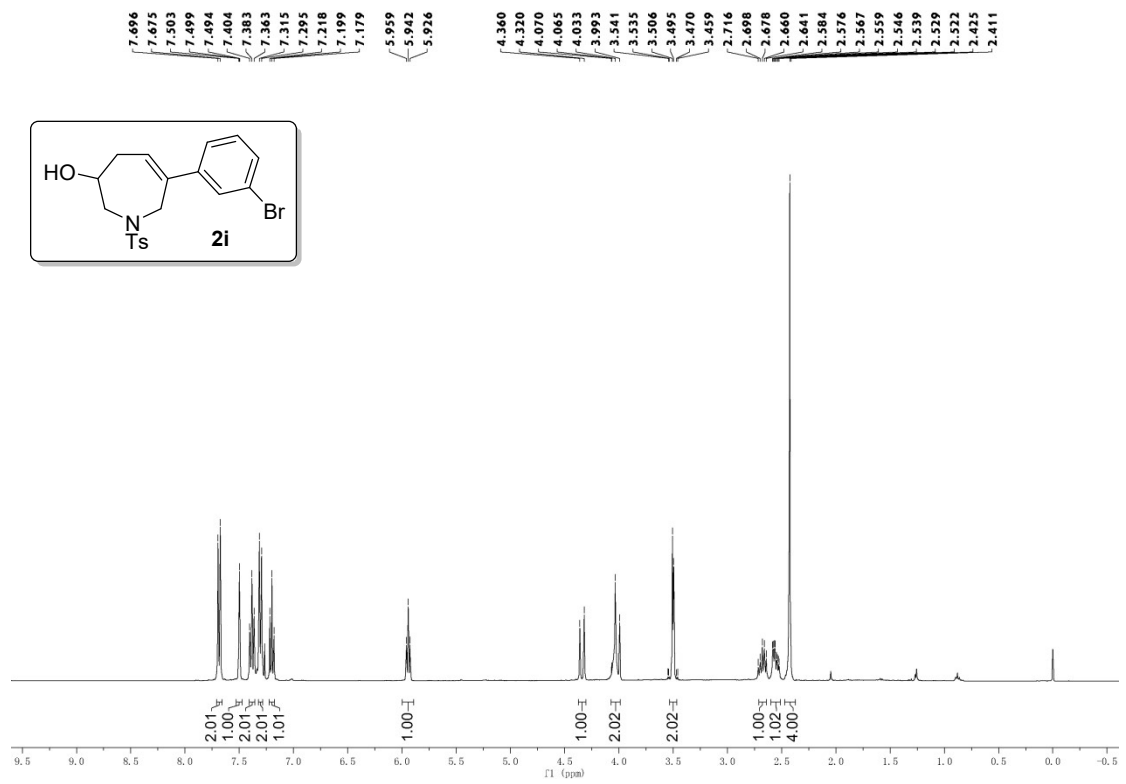

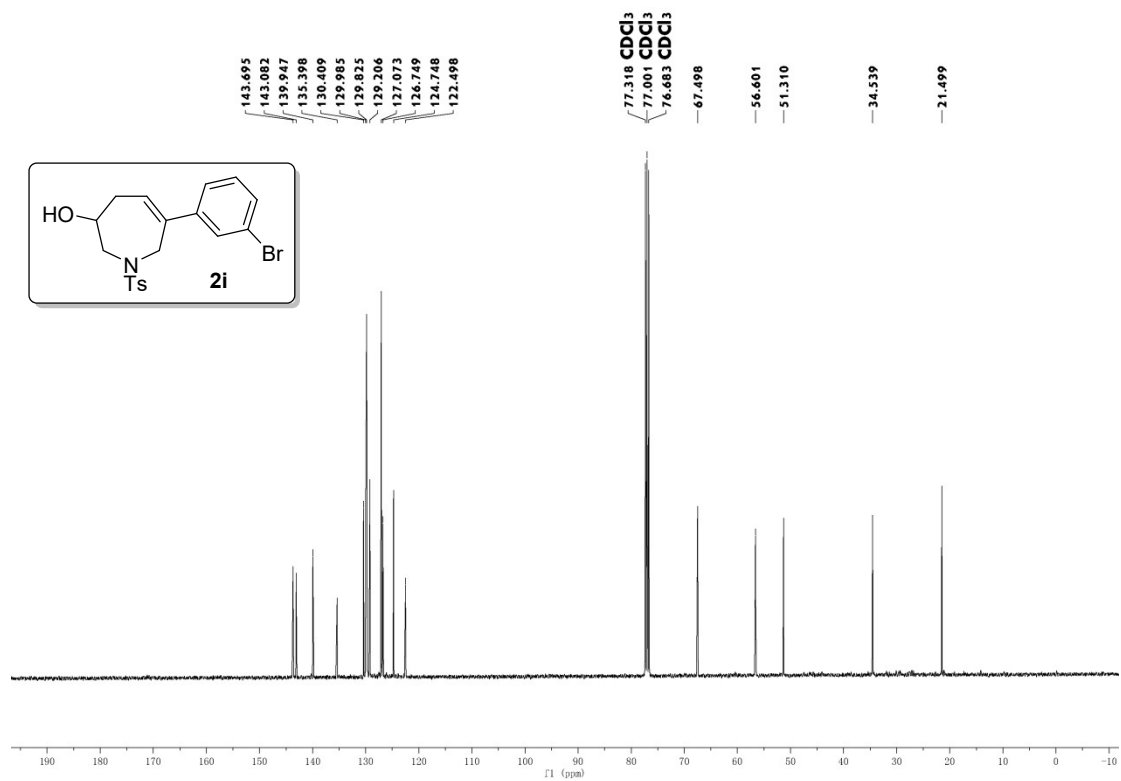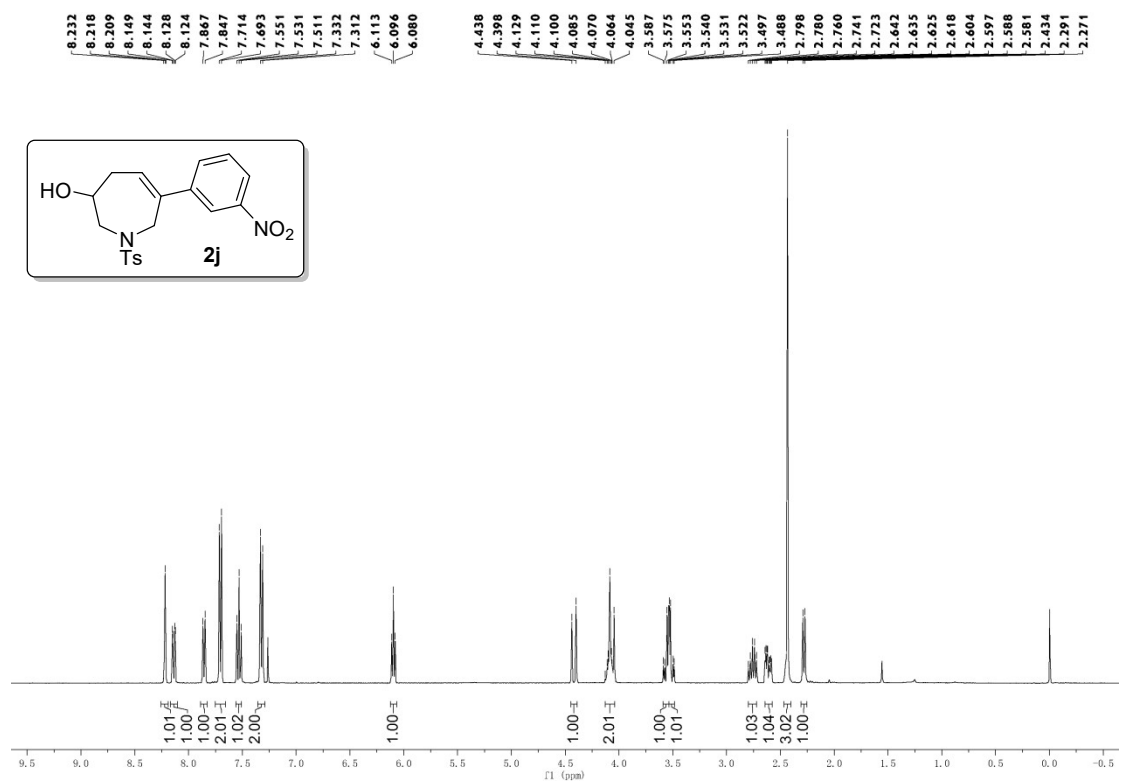

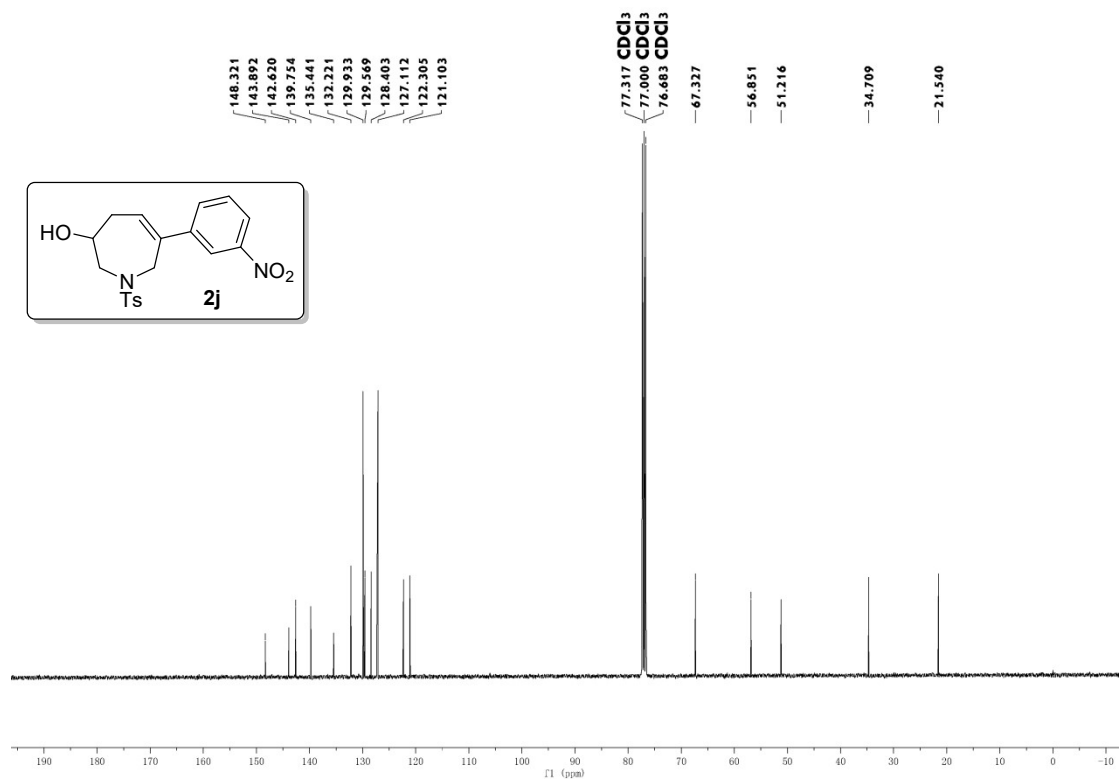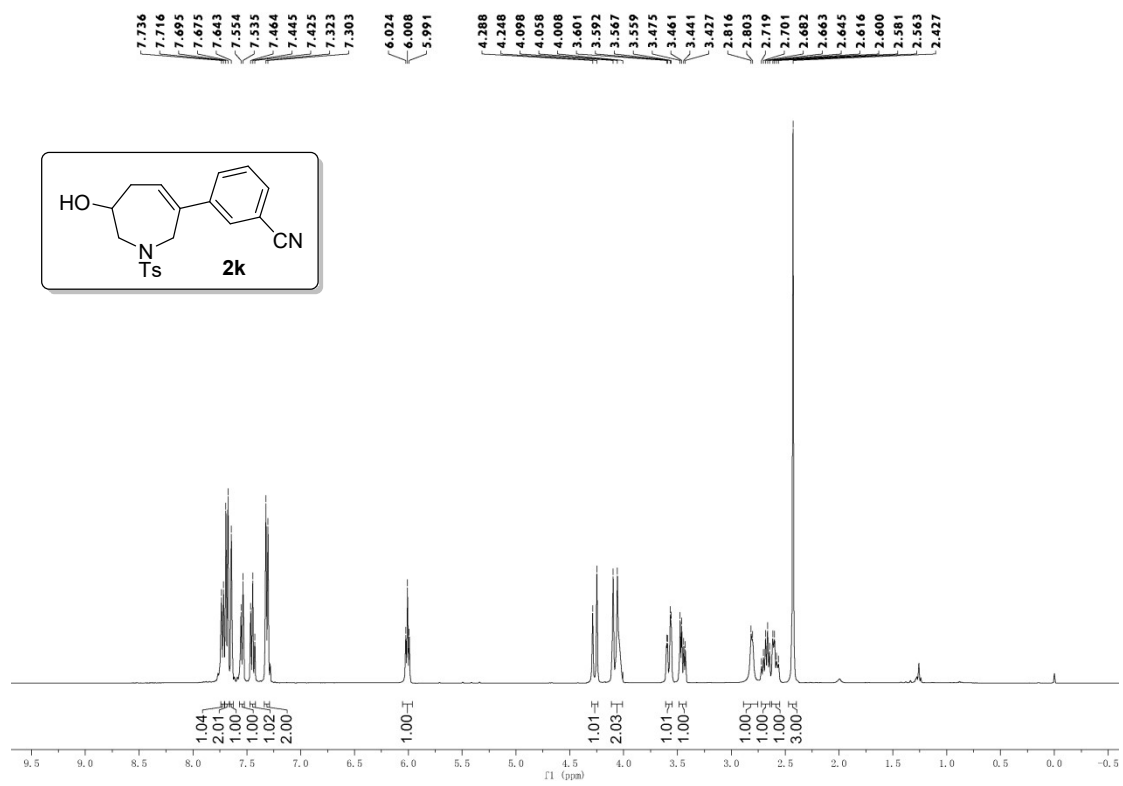

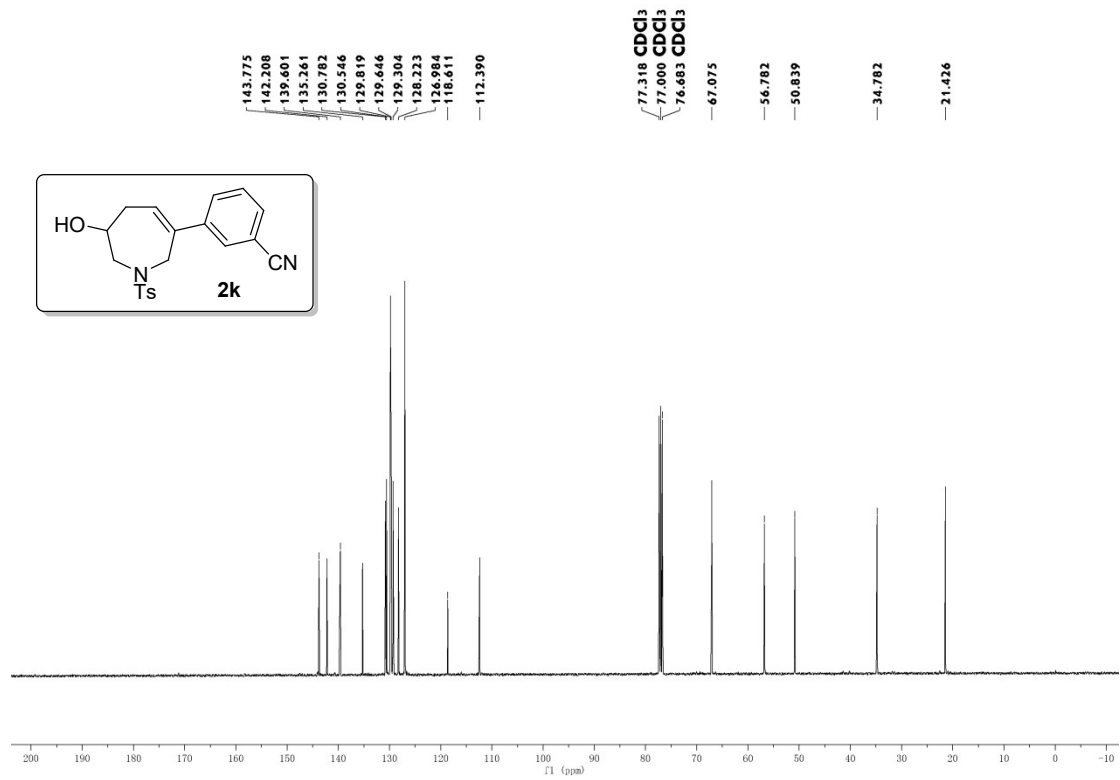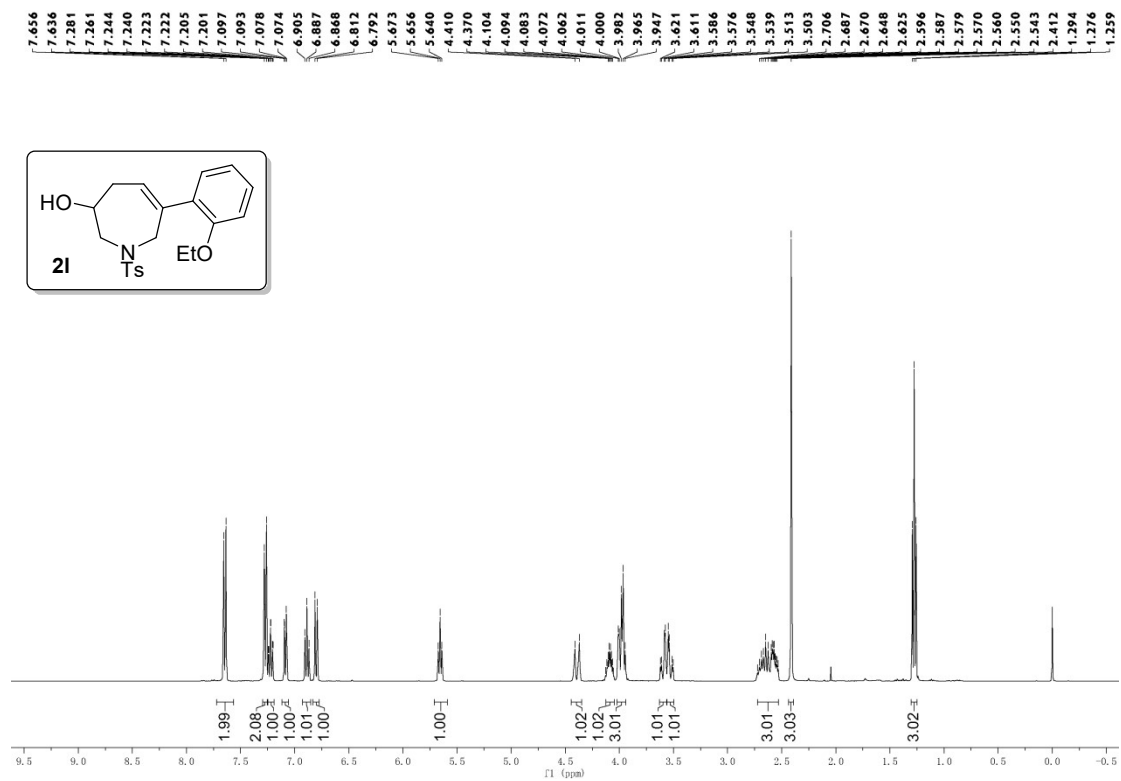

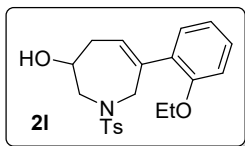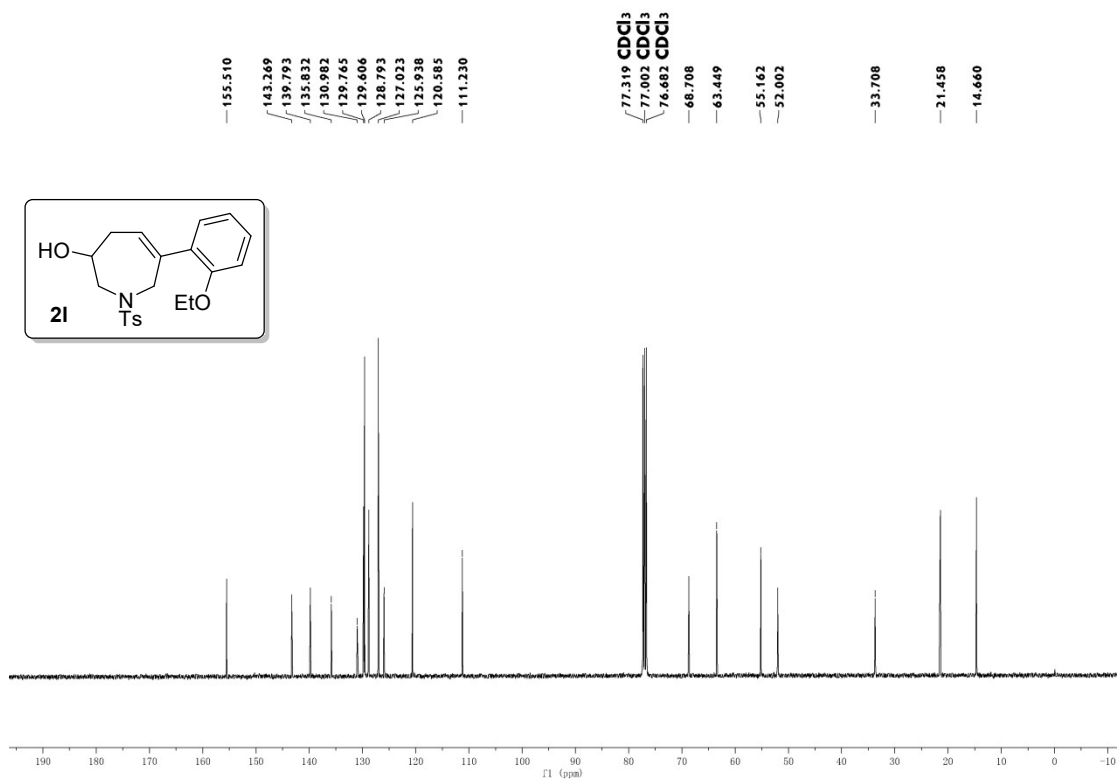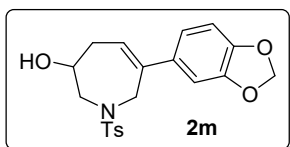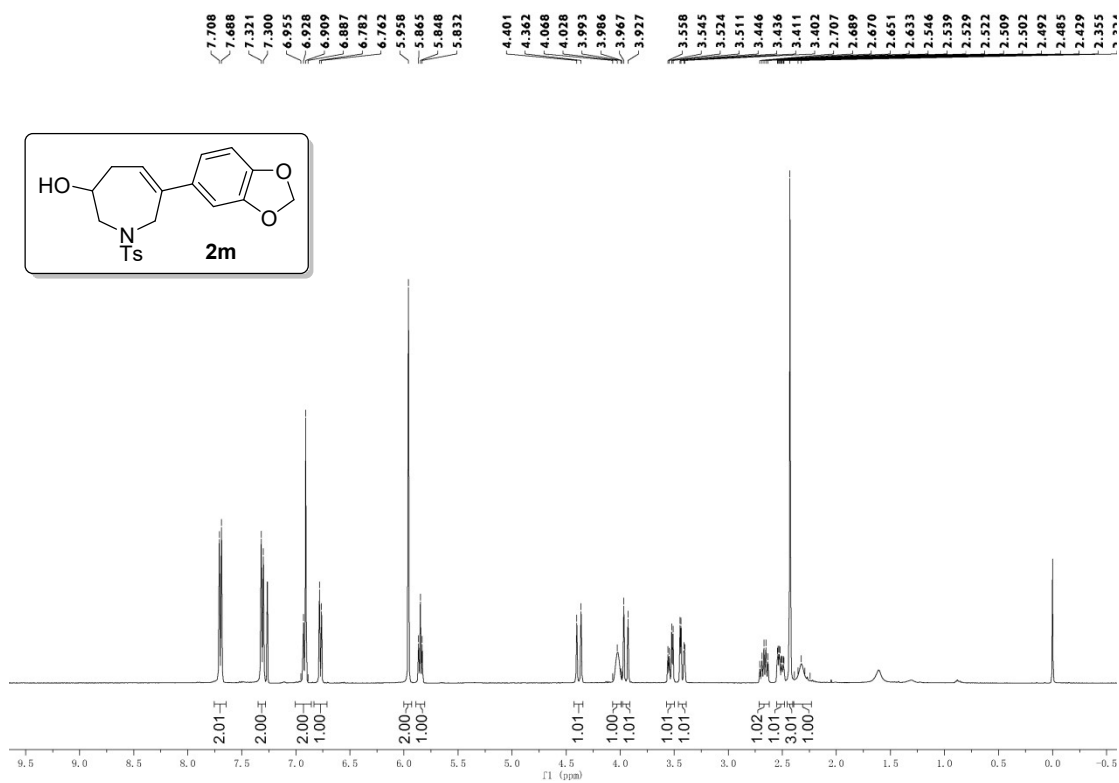



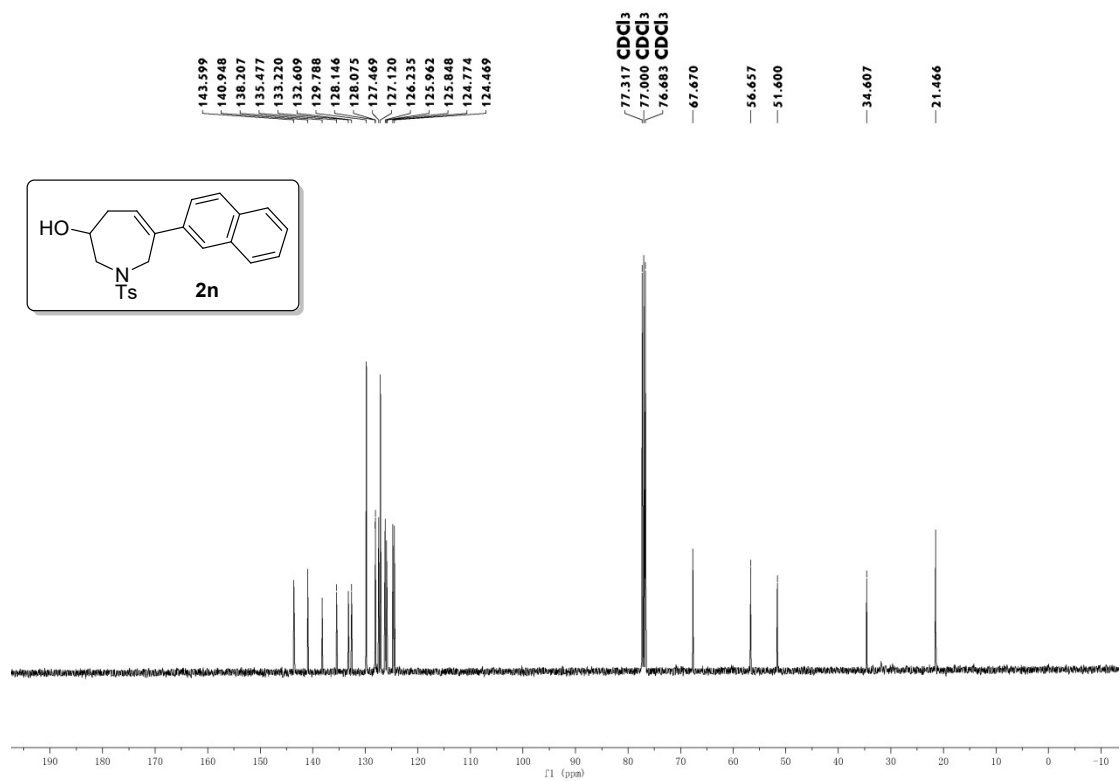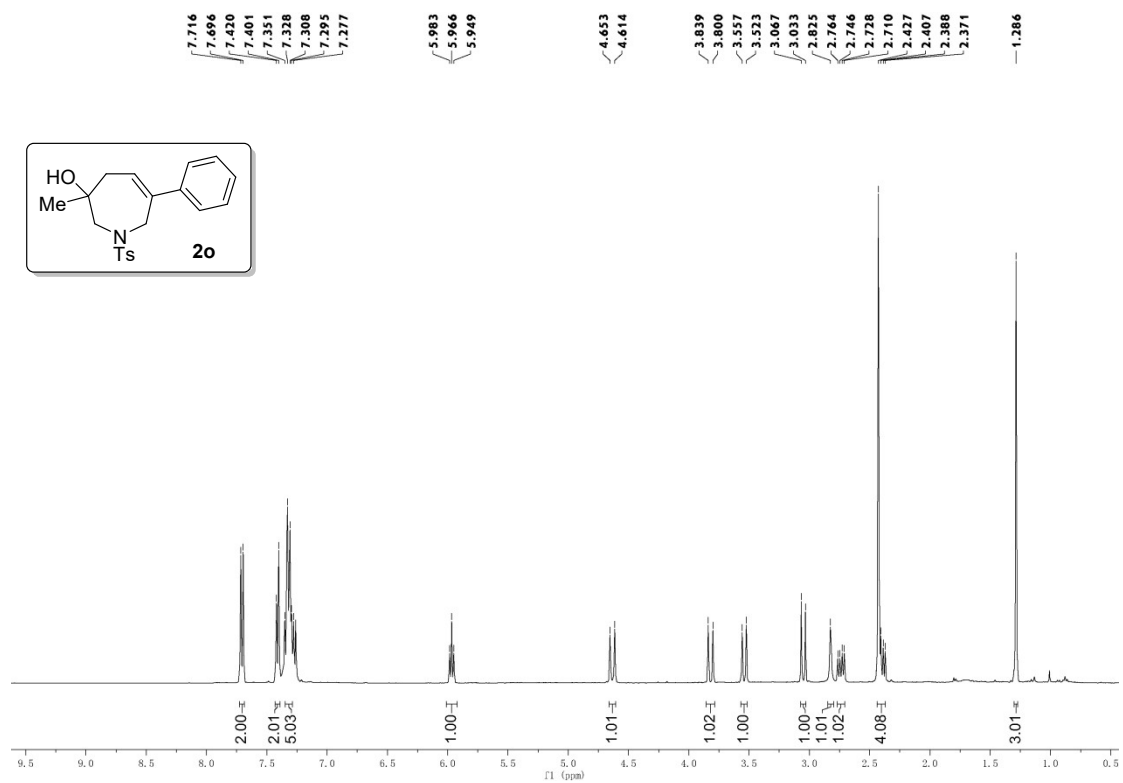

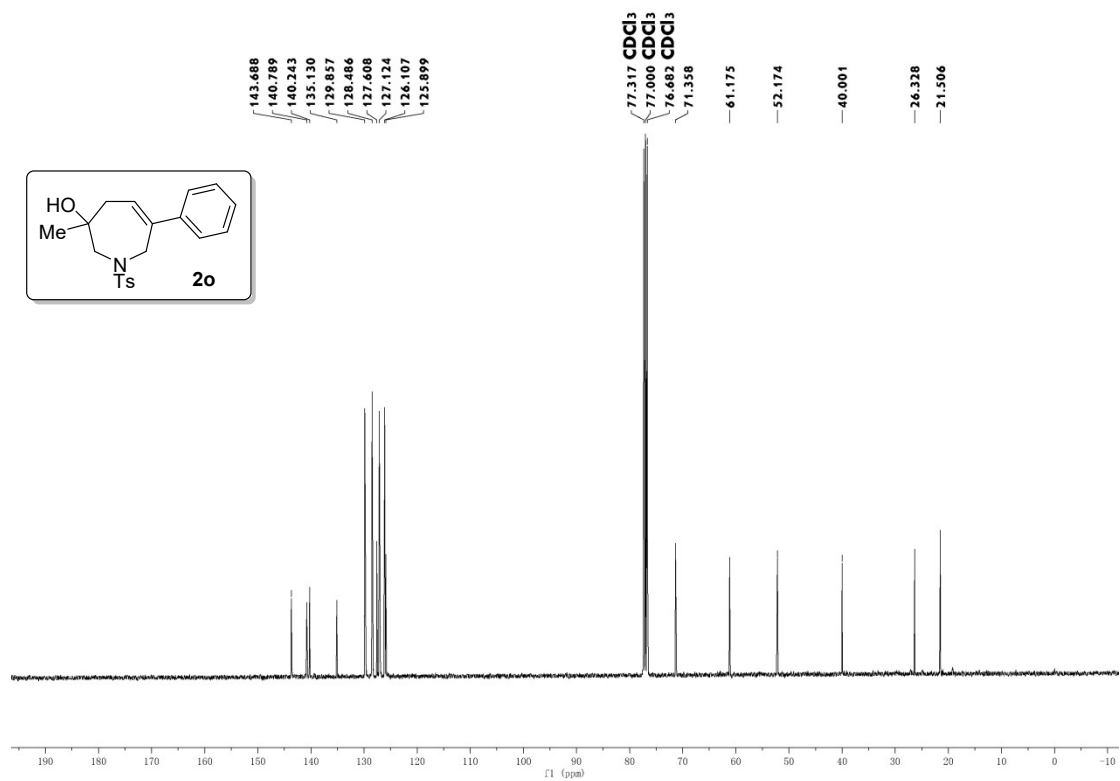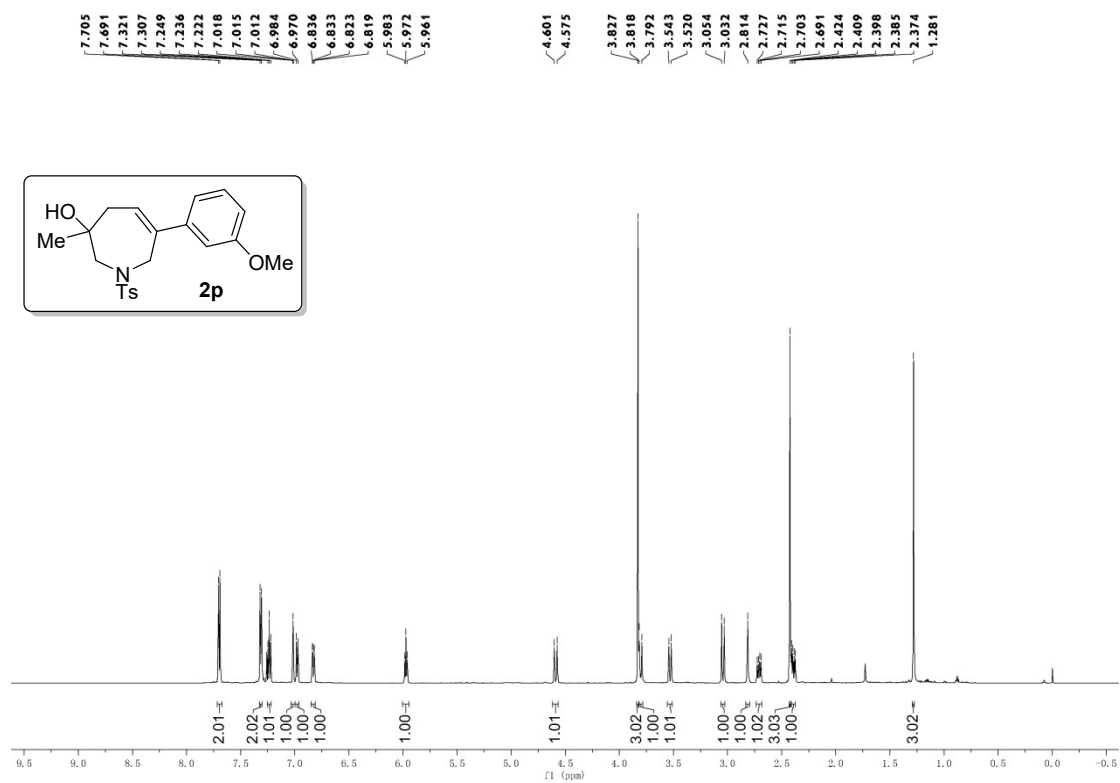



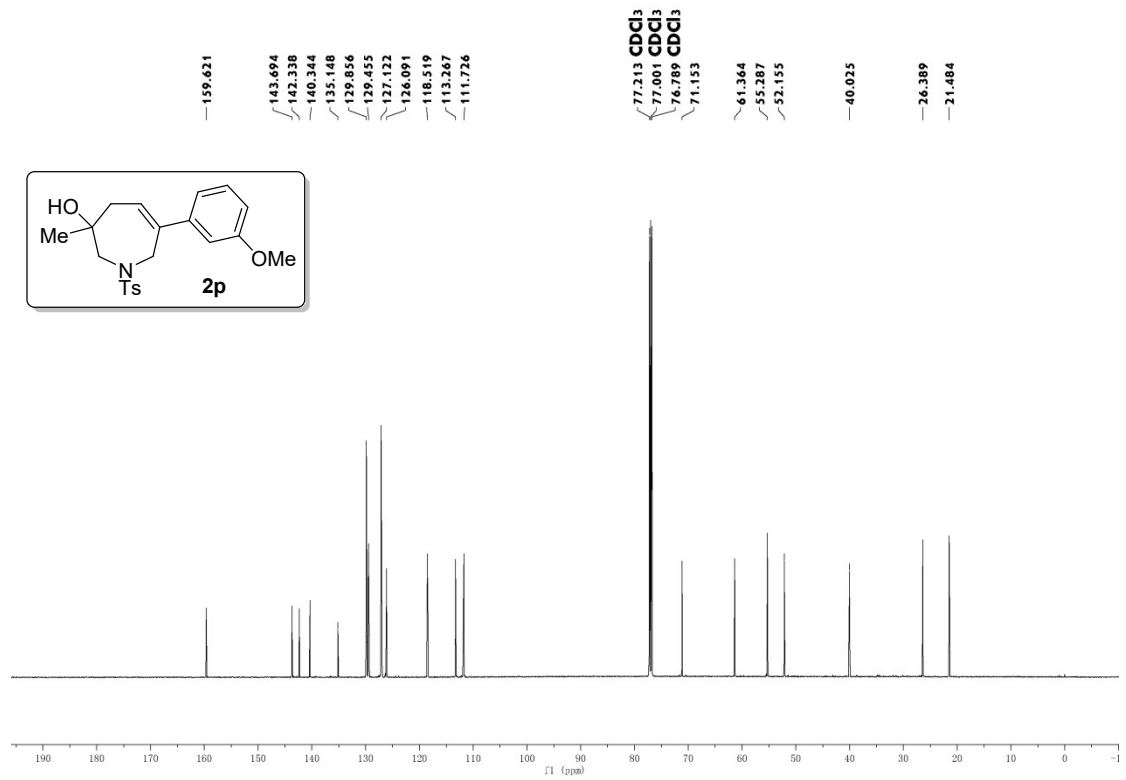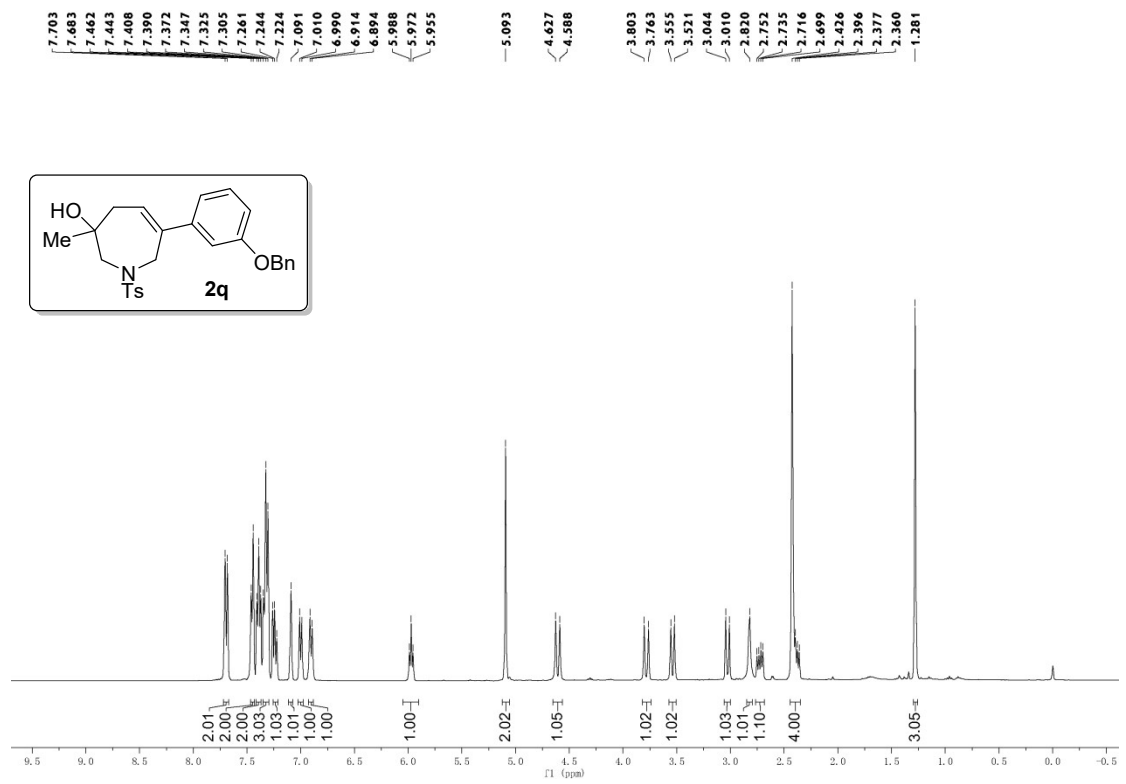

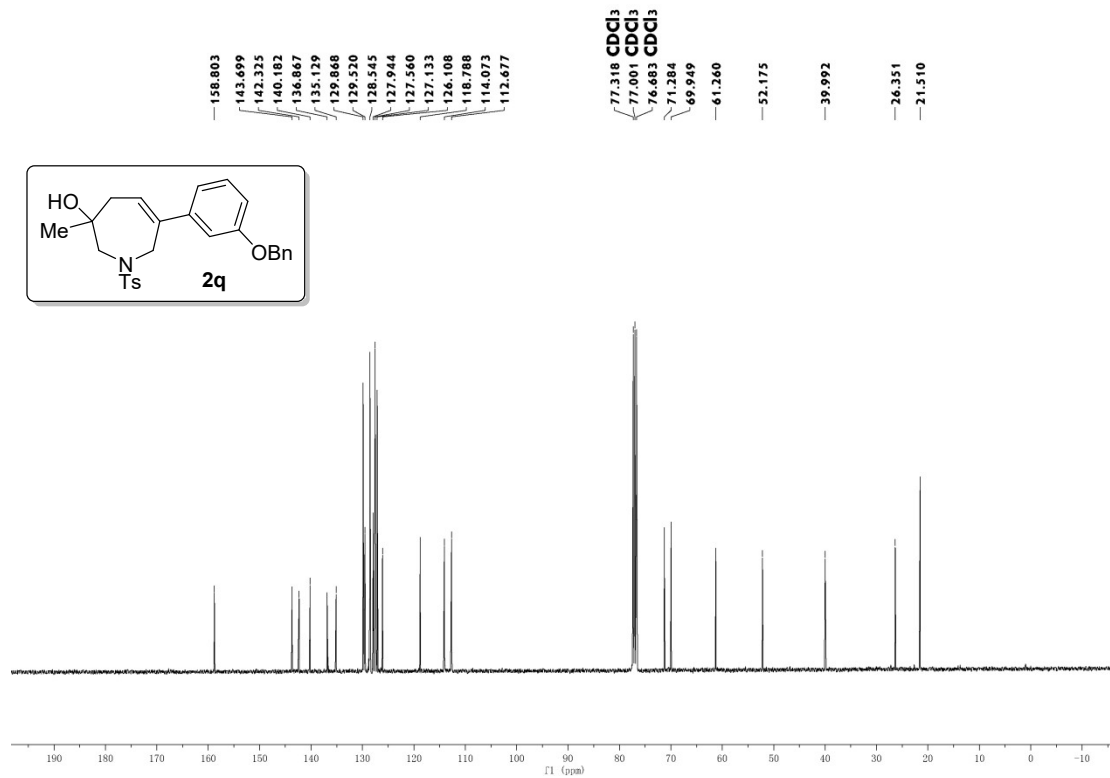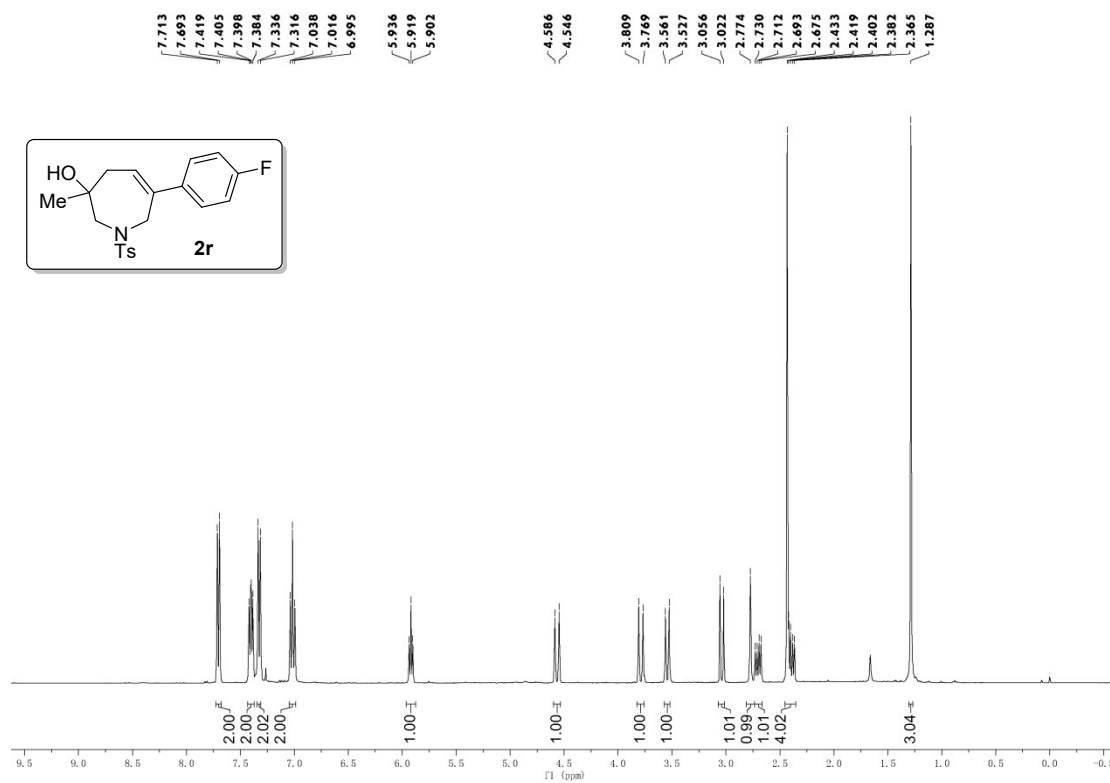

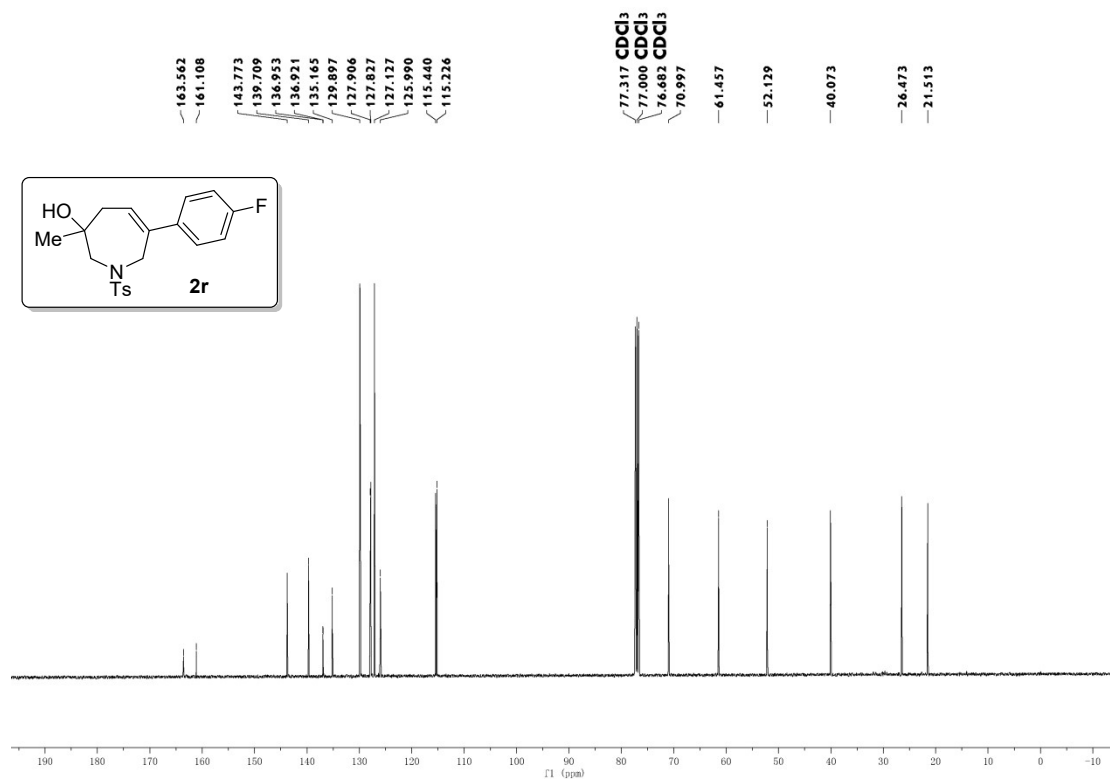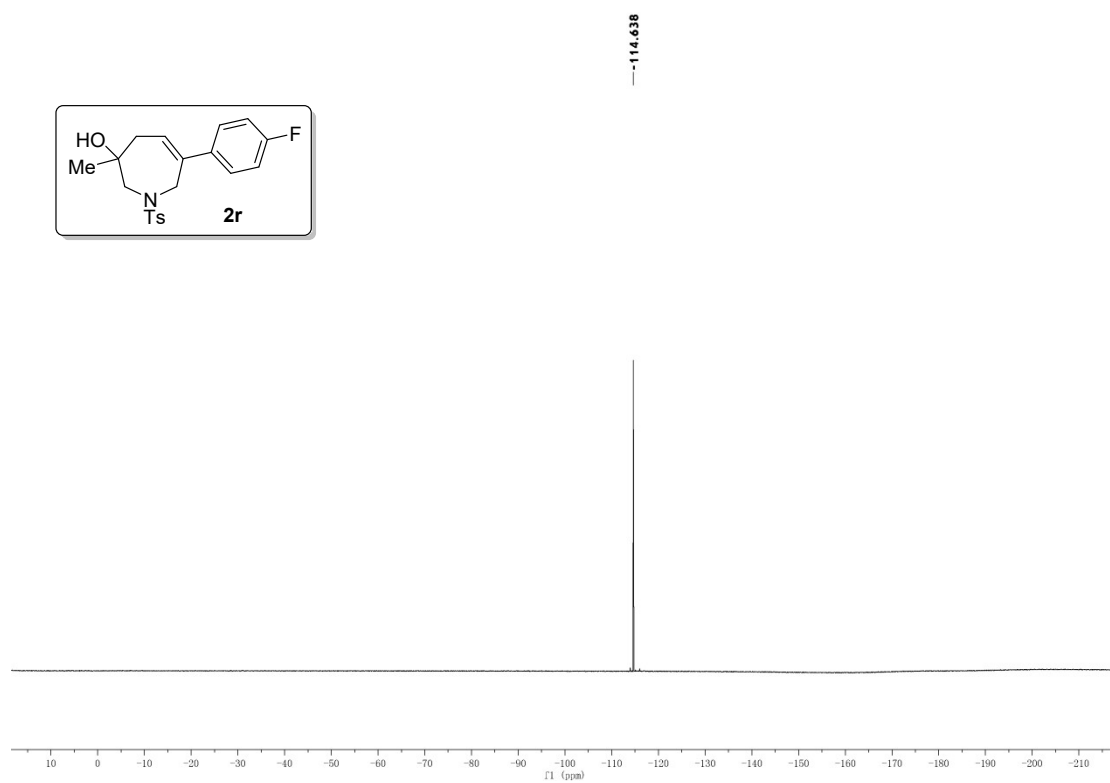

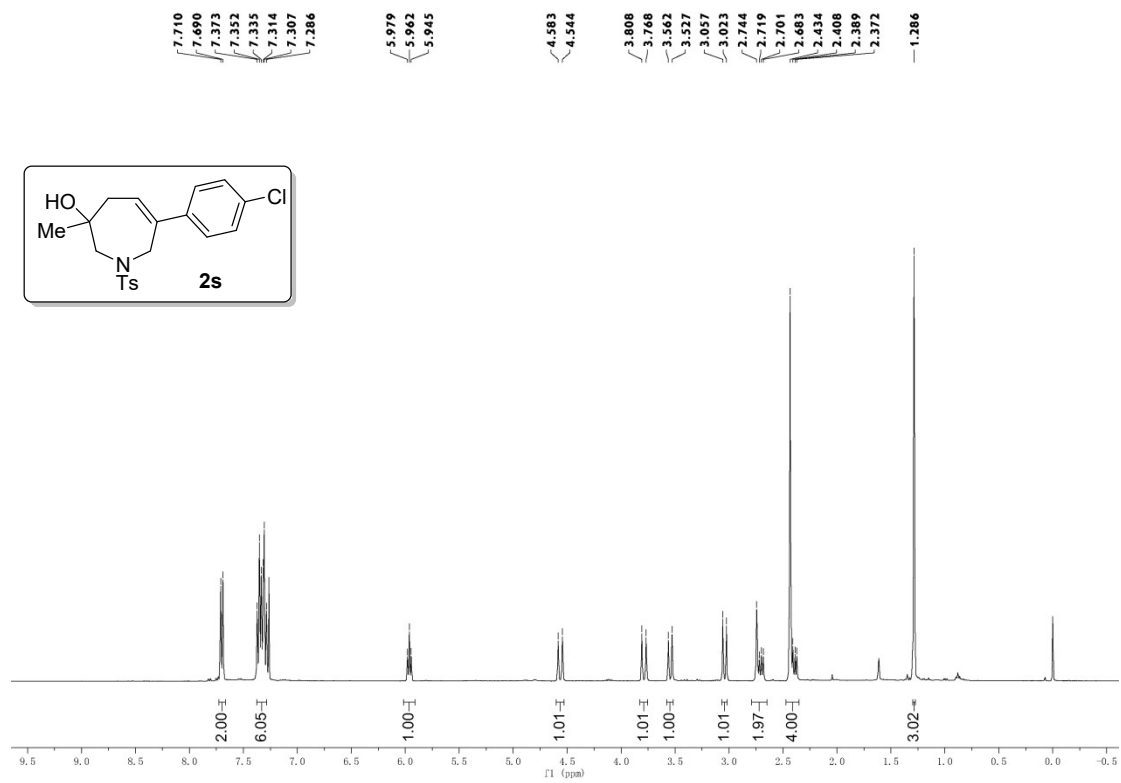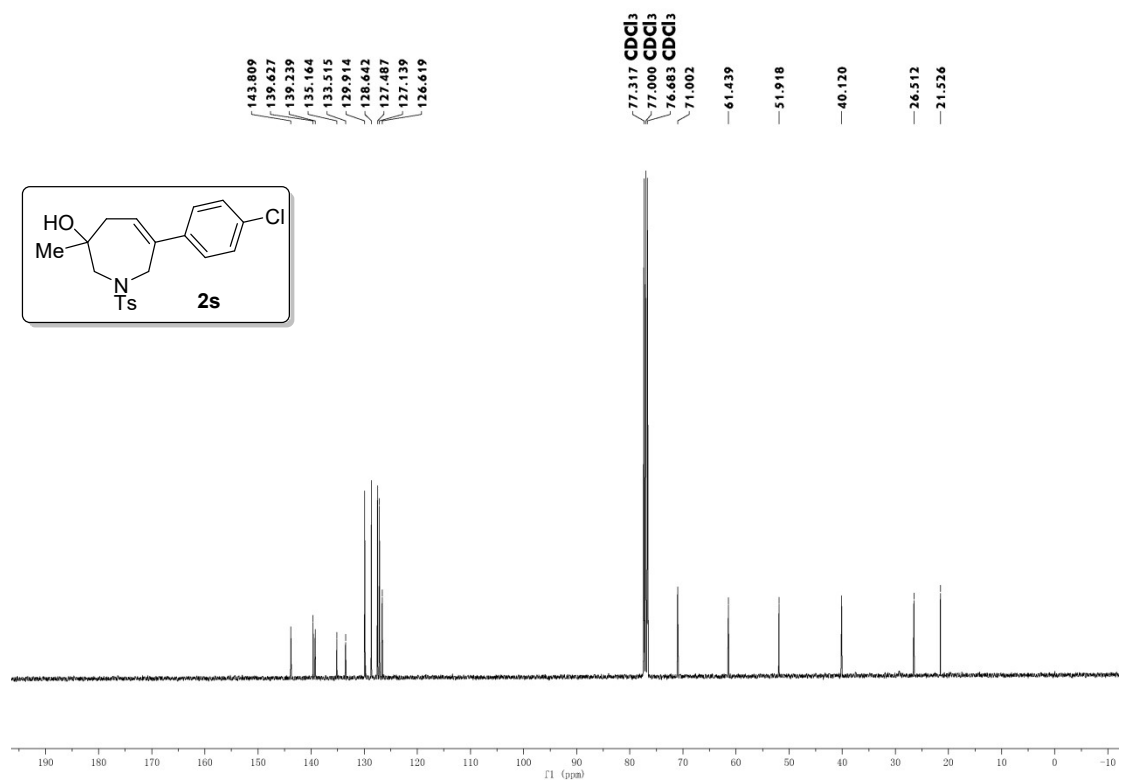

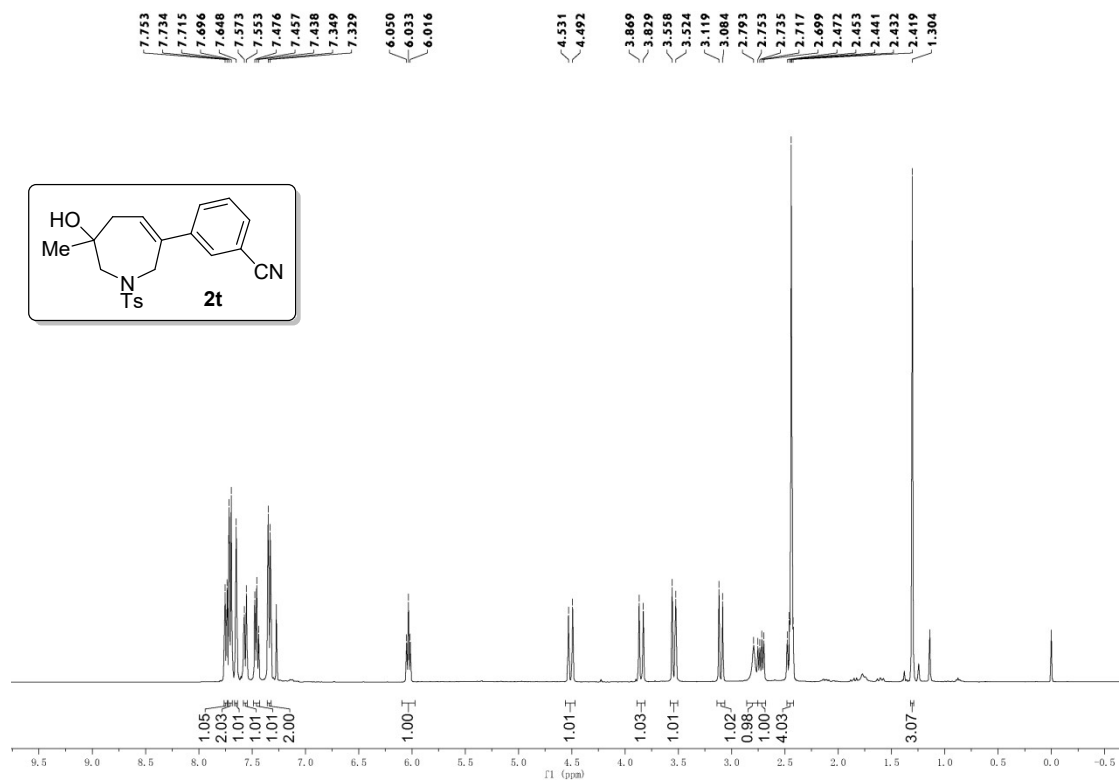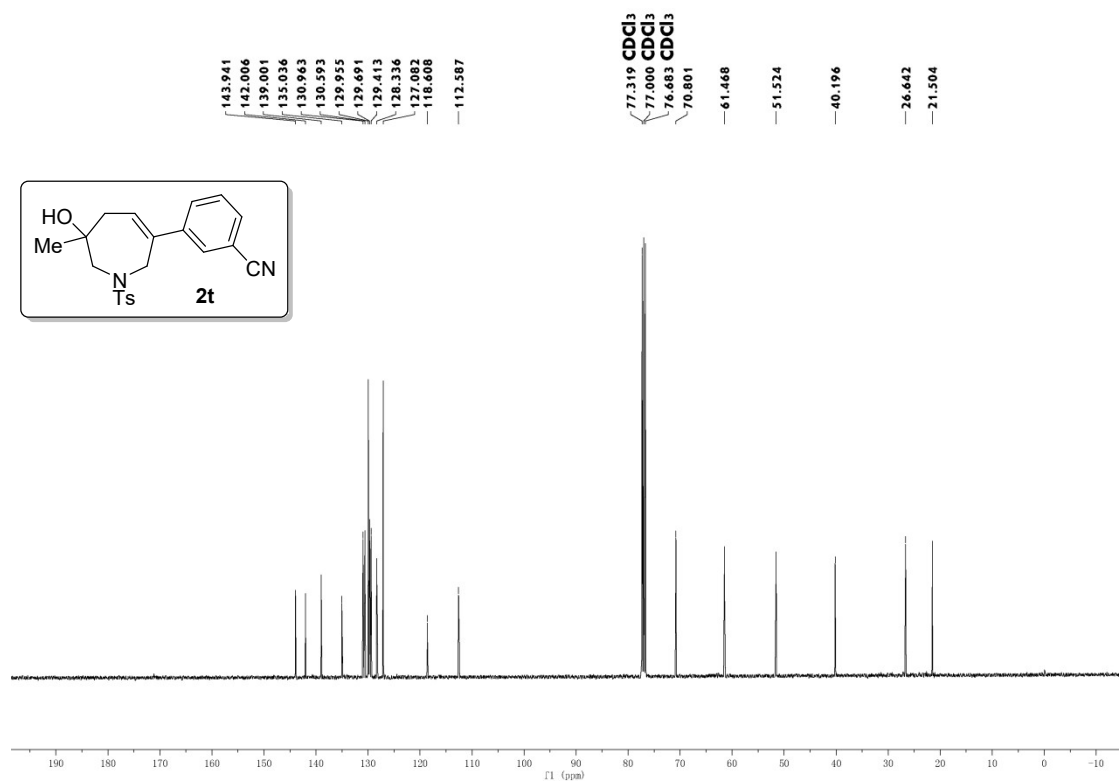

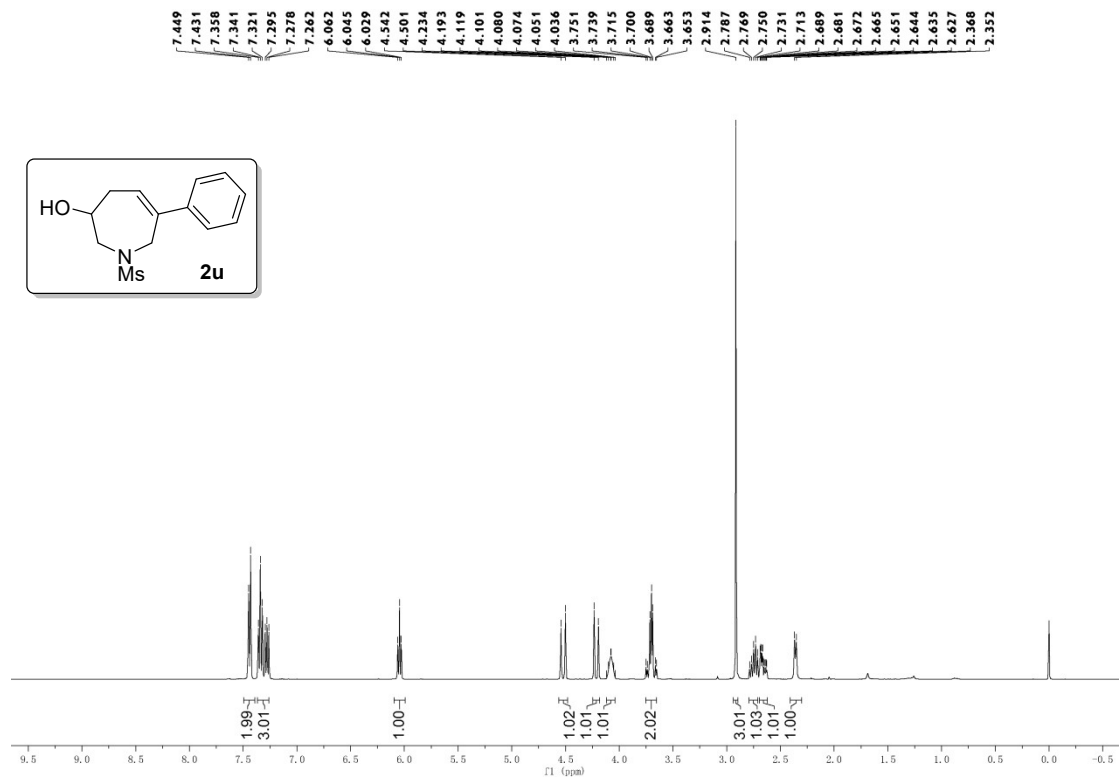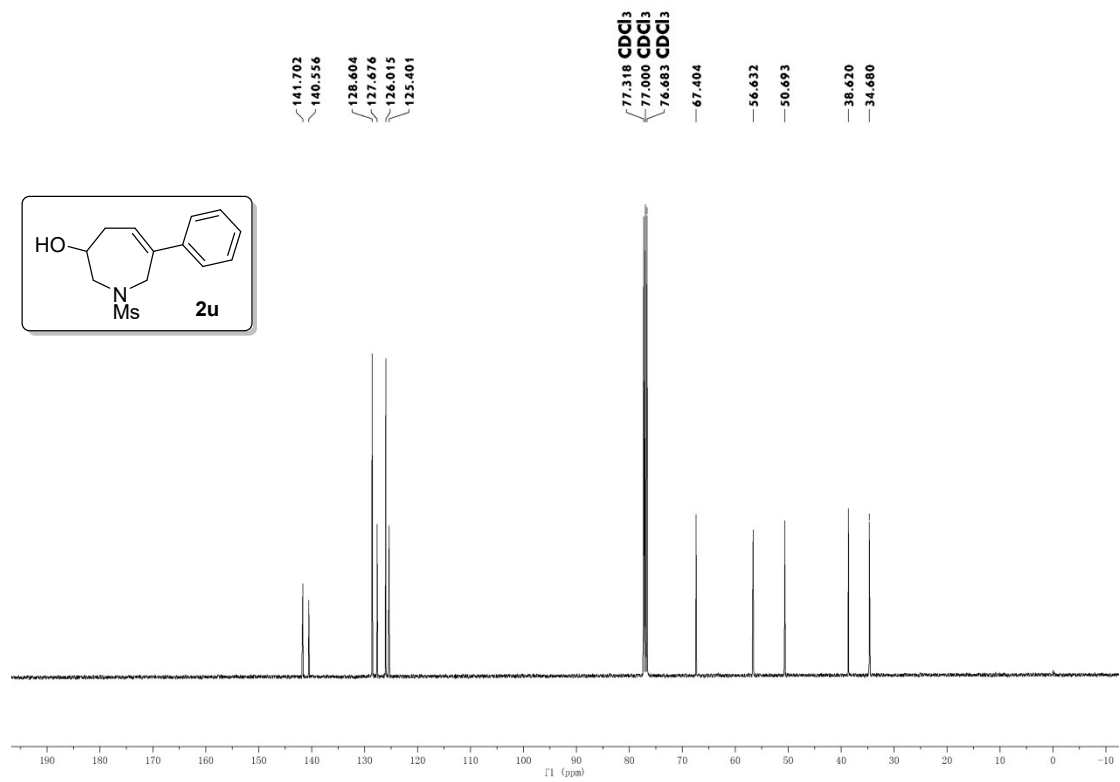

7.825  
7.813  
7.811  
7.601  
7.589  
7.586  
7.576  
7.529  
7.516  
7.503  
7.415  
7.403  
7.345  
7.333  
7.320  
7.289  
7.277  
7.265  
5.949  
5.938  
5.927  
4.469  
4.443  
4.443  
4.068  
4.060  
4.054  
4.052  
4.046  
4.041  
3.562  
3.560  
3.554  
3.539  
3.538  
3.531  
3.529  
3.513  
3.506  
3.490  
3.483  
2.709  
2.707  
2.705  
2.695  
2.693  
2.684  
2.682  
2.681  
2.670  
2.579  
2.574  
2.568  
2.562  
2.554  
2.549  
2.543  
2.407  
2.393

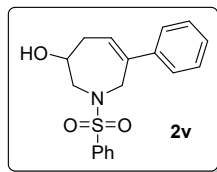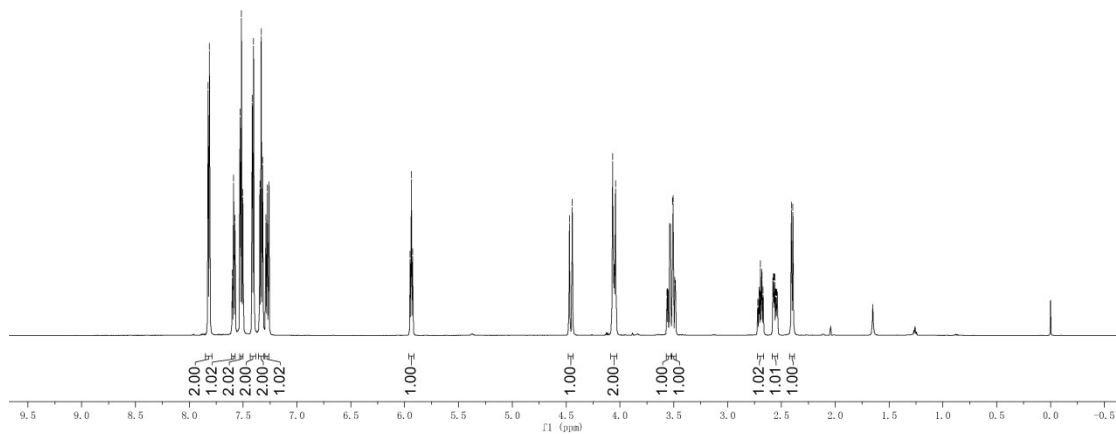

140.978  
140.954  
138.565  
132.769  
129.210  
128.497  
127.591  
127.064  
126.160  
125.190

77.211 CDCl<sub>3</sub>  
77.000 CDCl<sub>3</sub>  
76.787 CDCl<sub>3</sub>  
-67.790  
-56.604  
-51.742  
-34.473

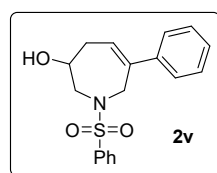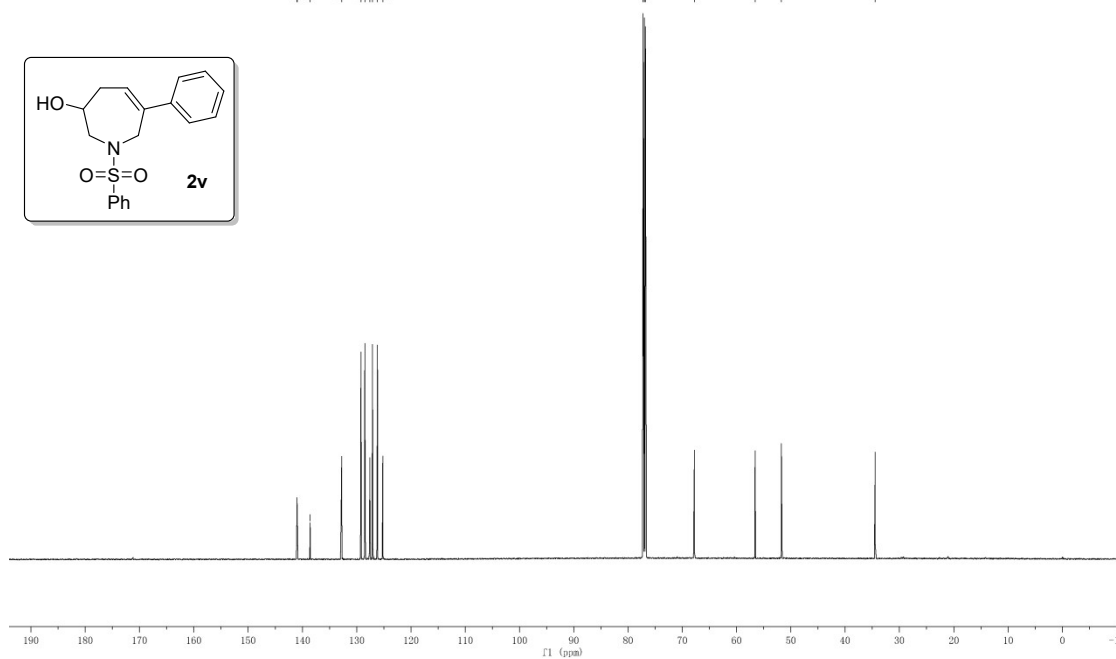

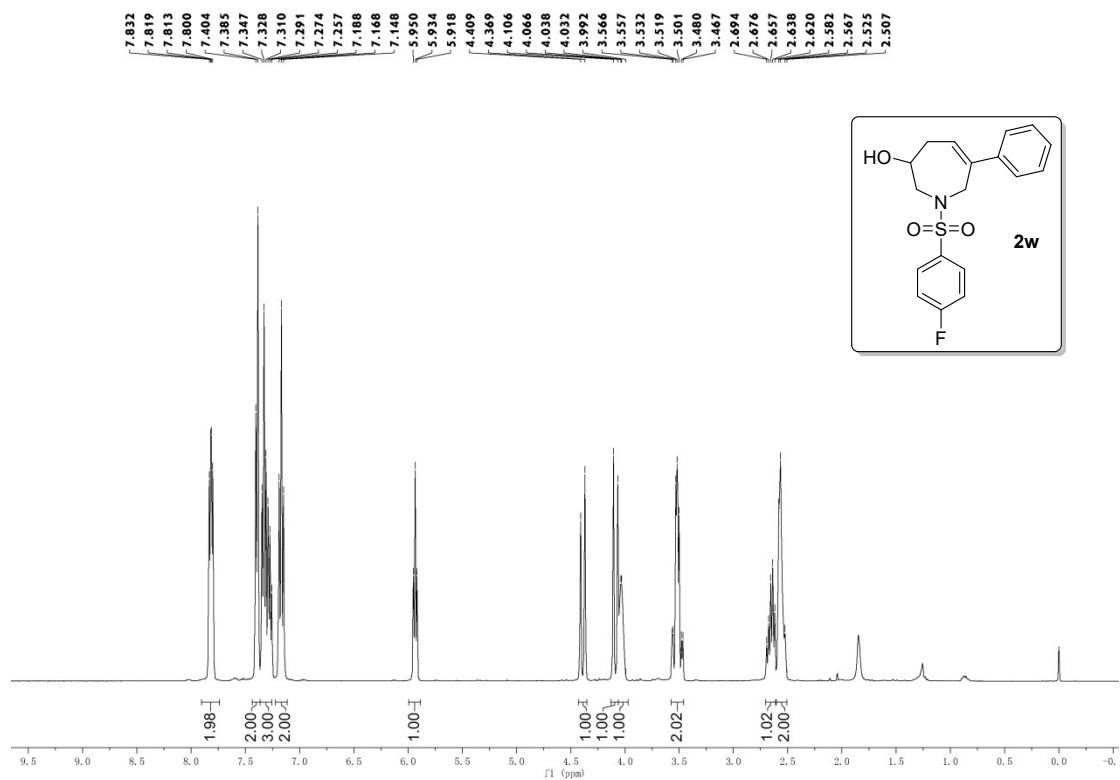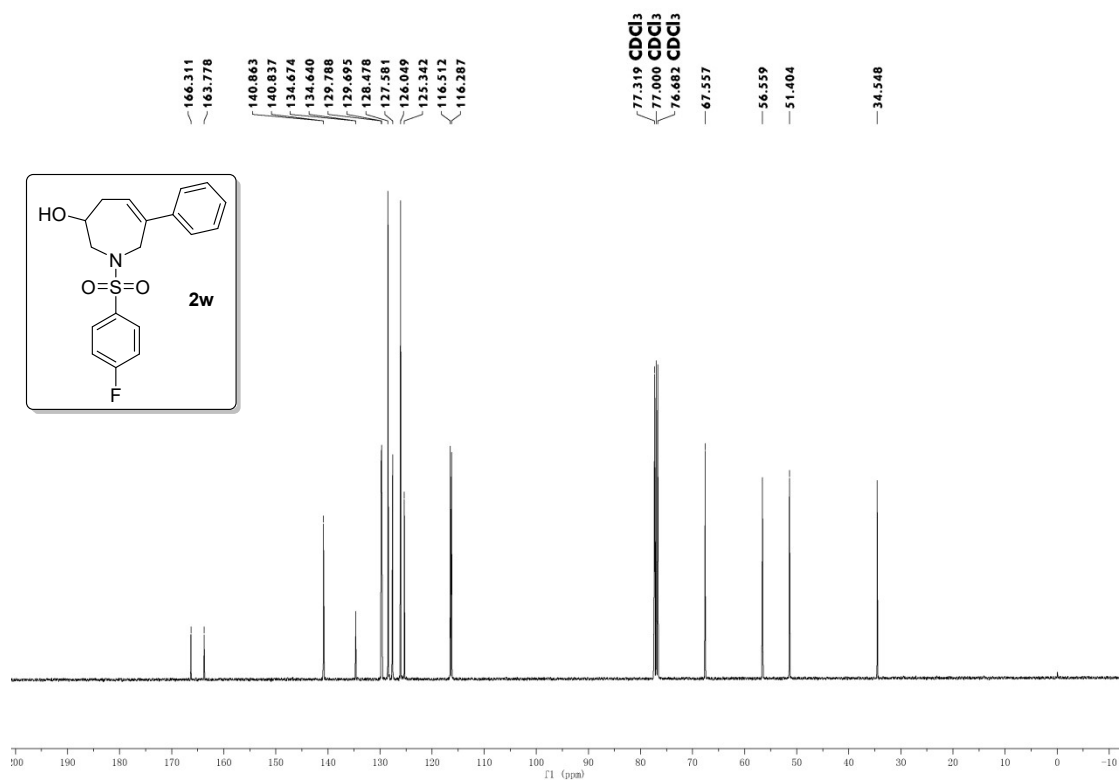



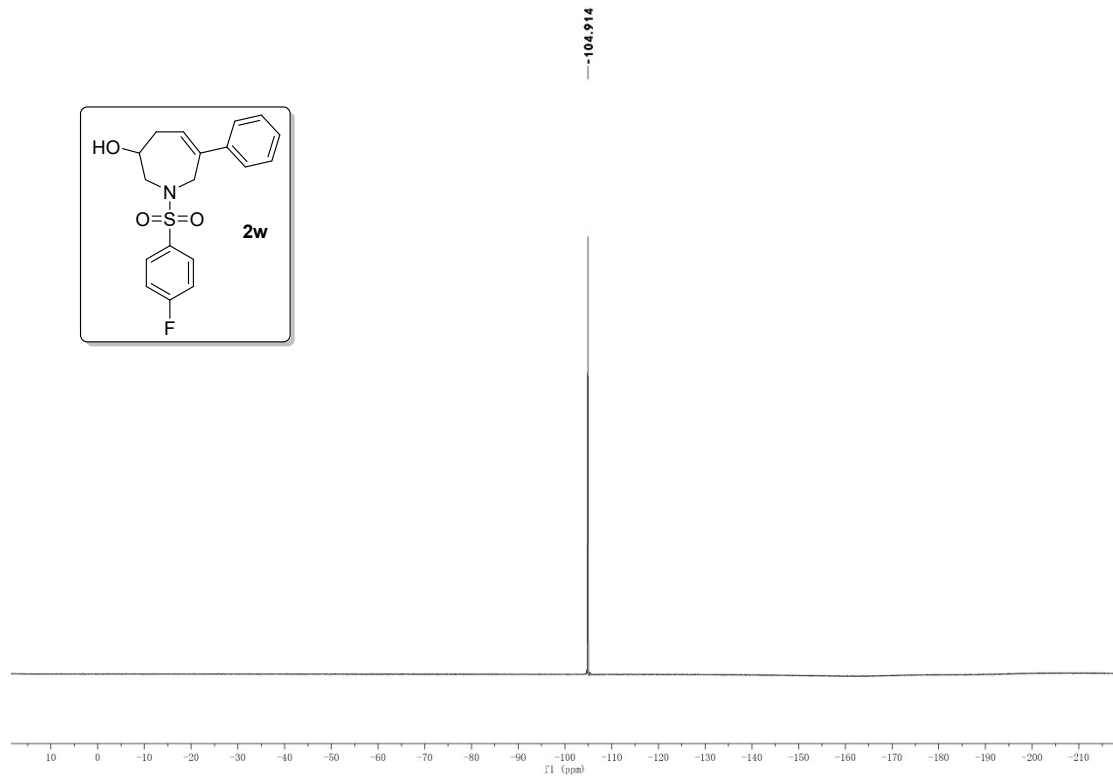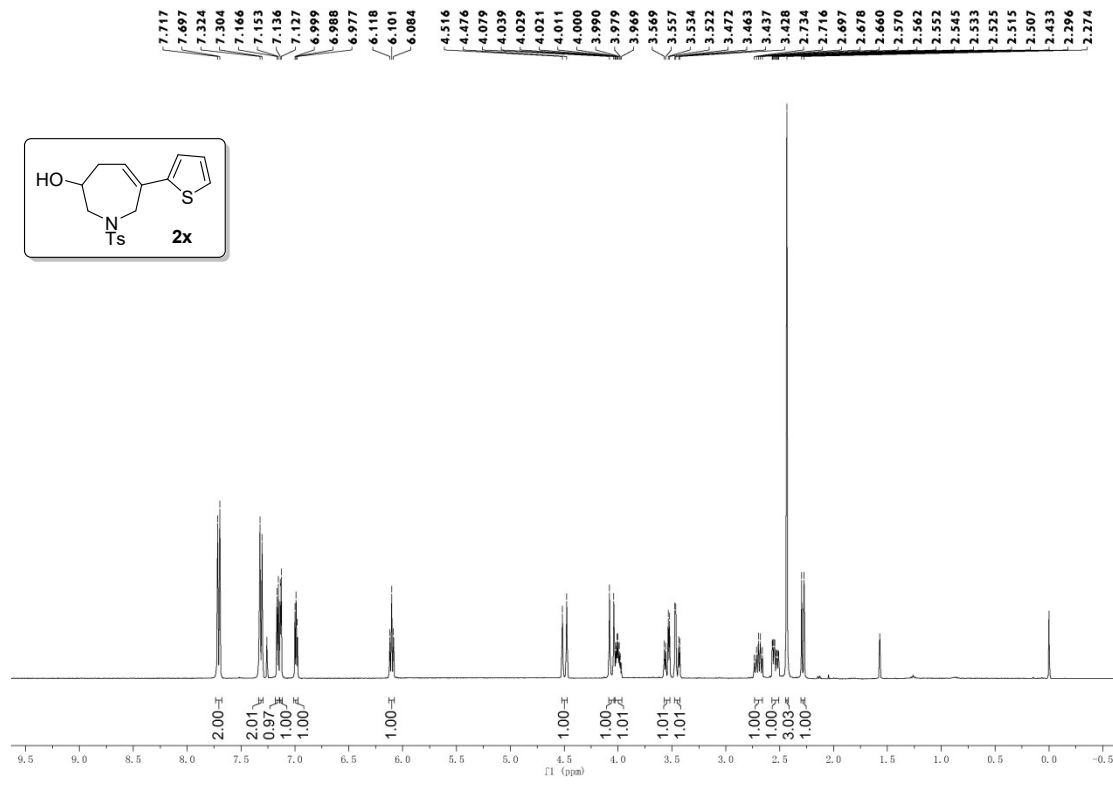

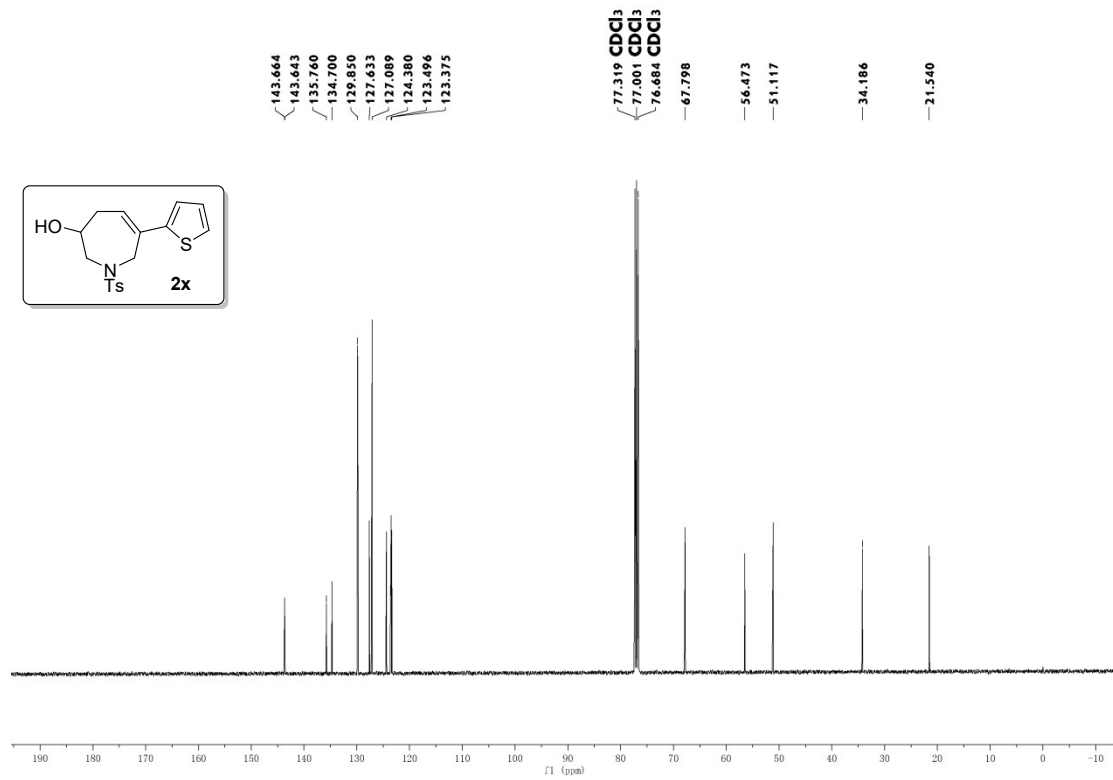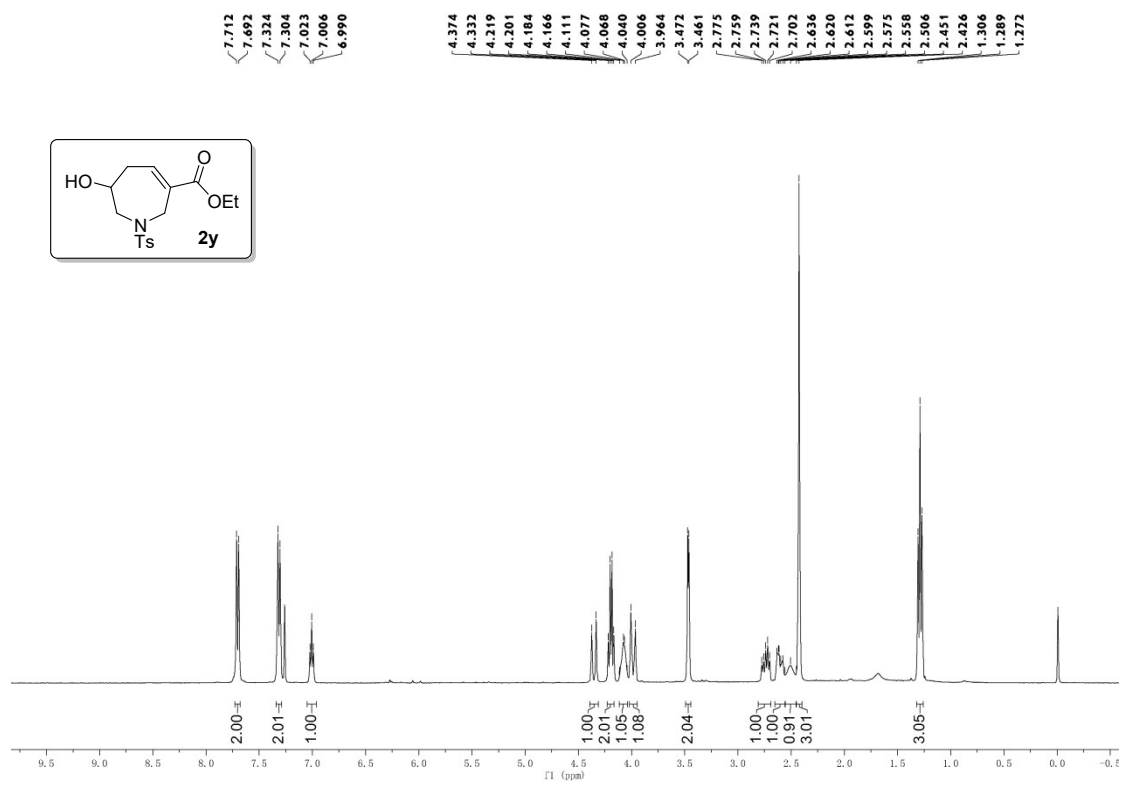

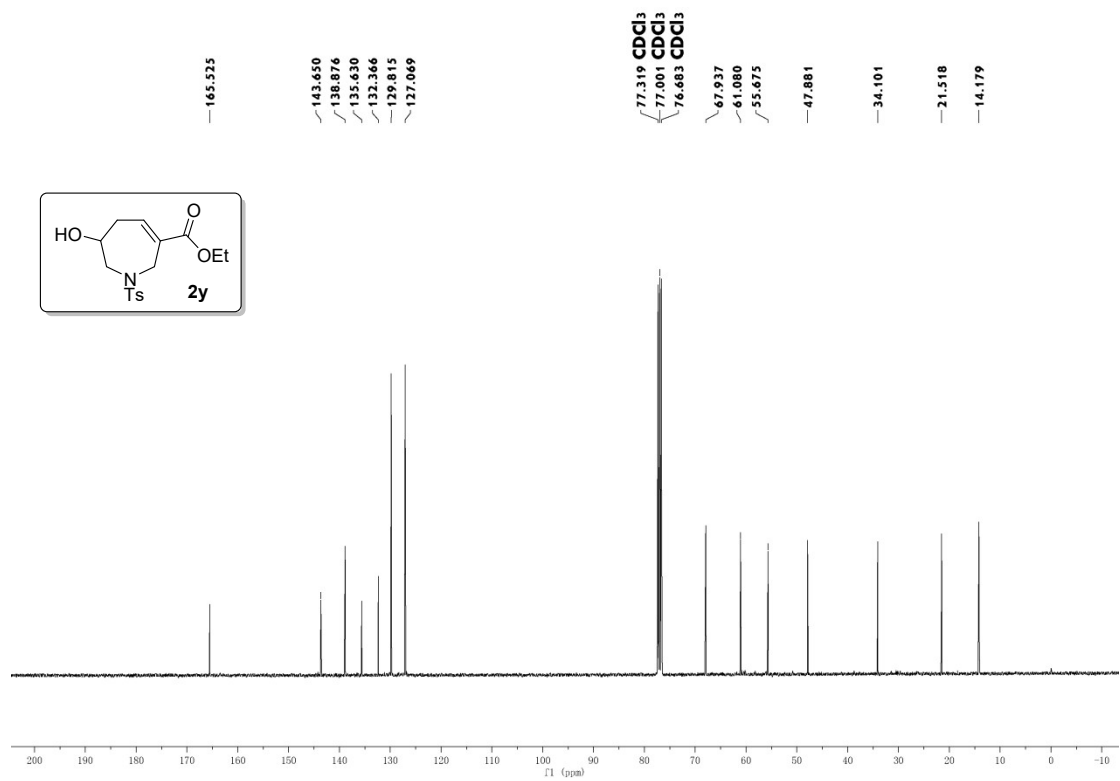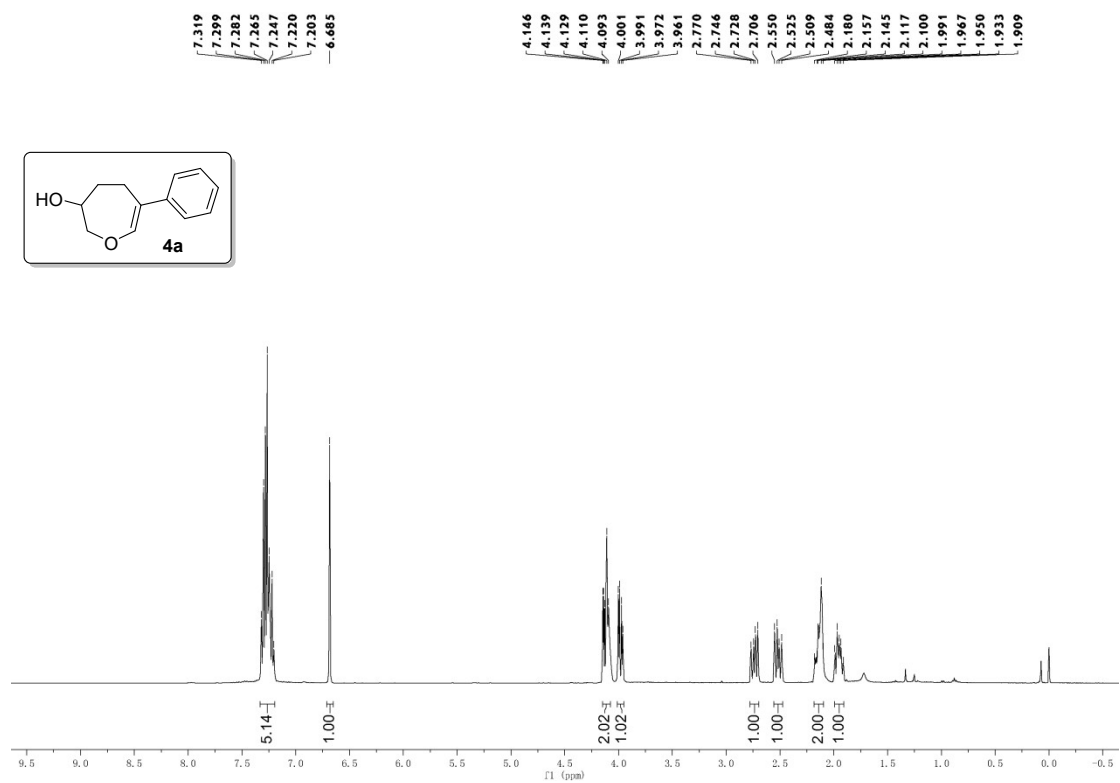

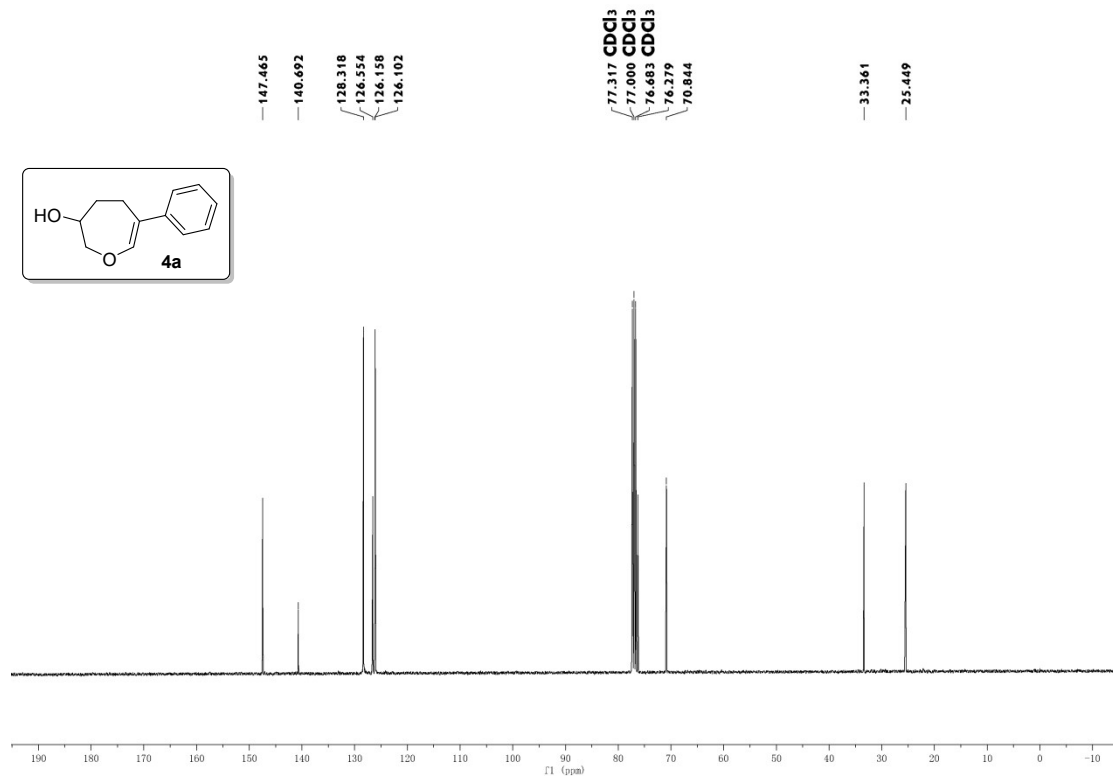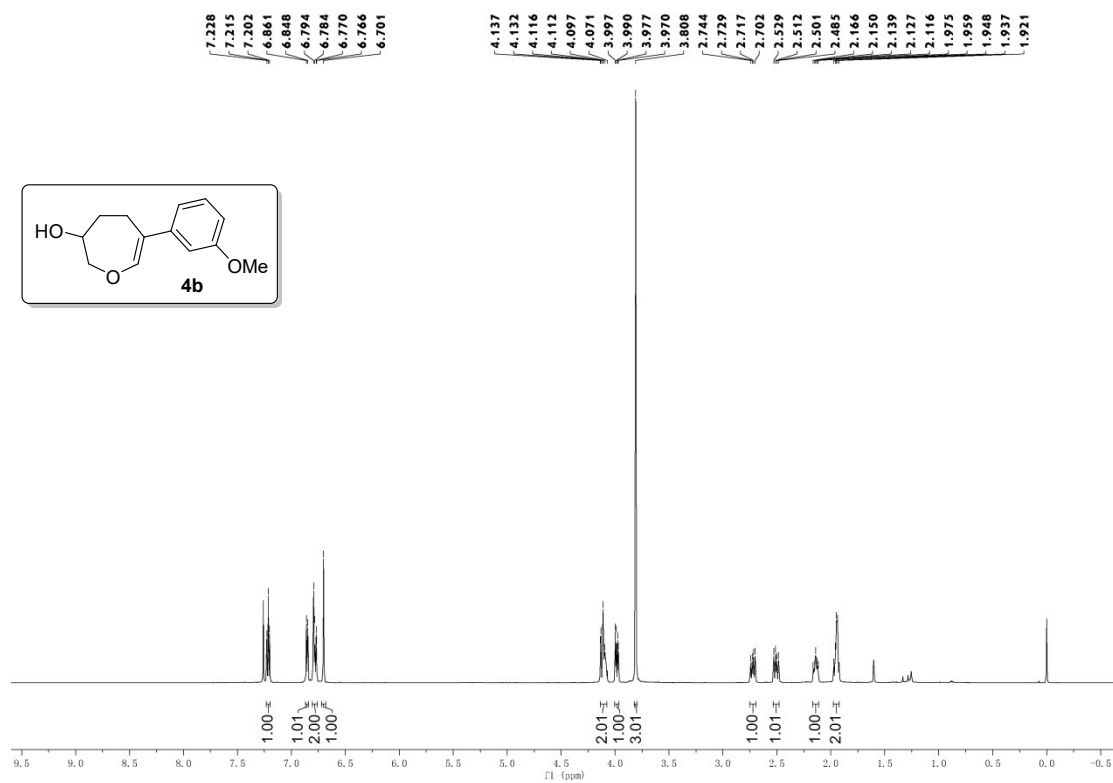

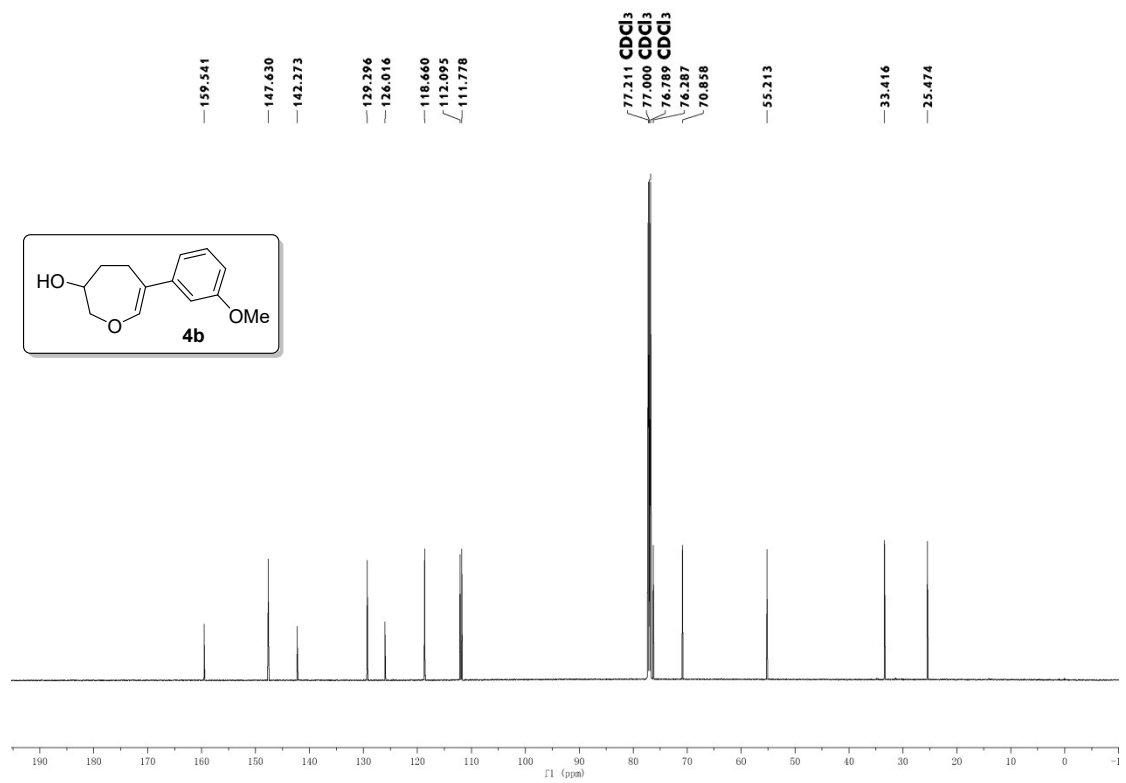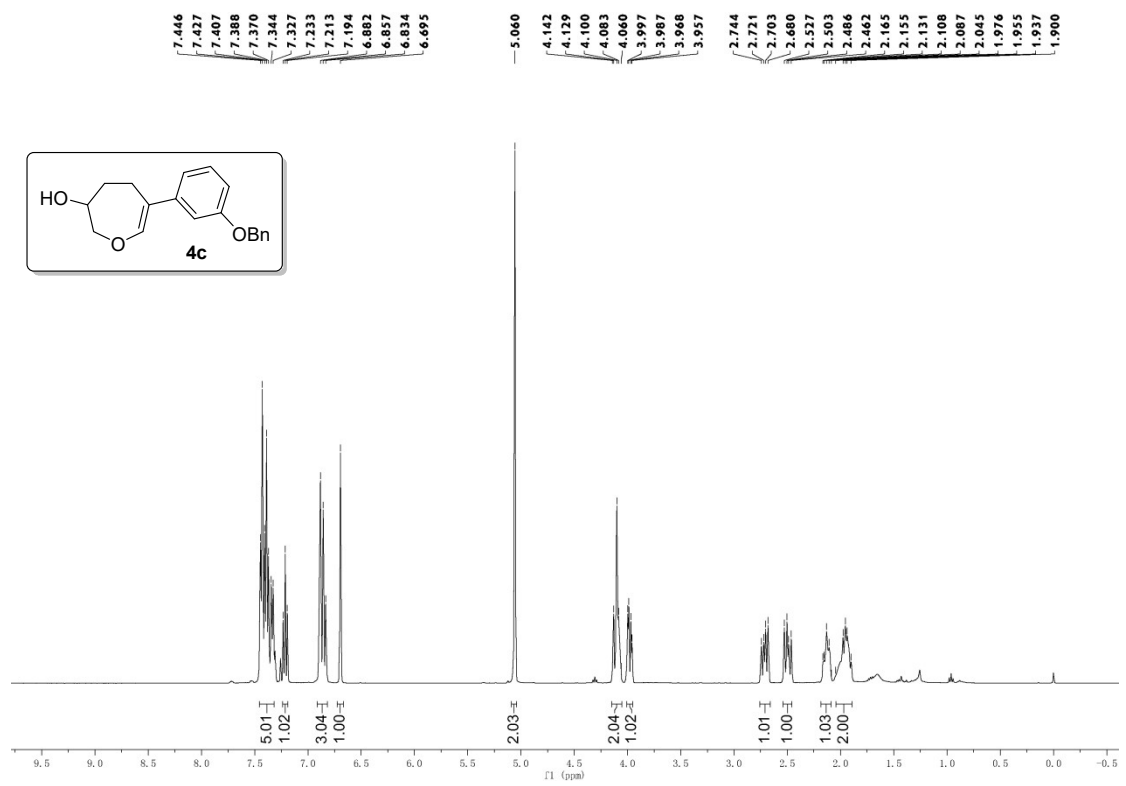

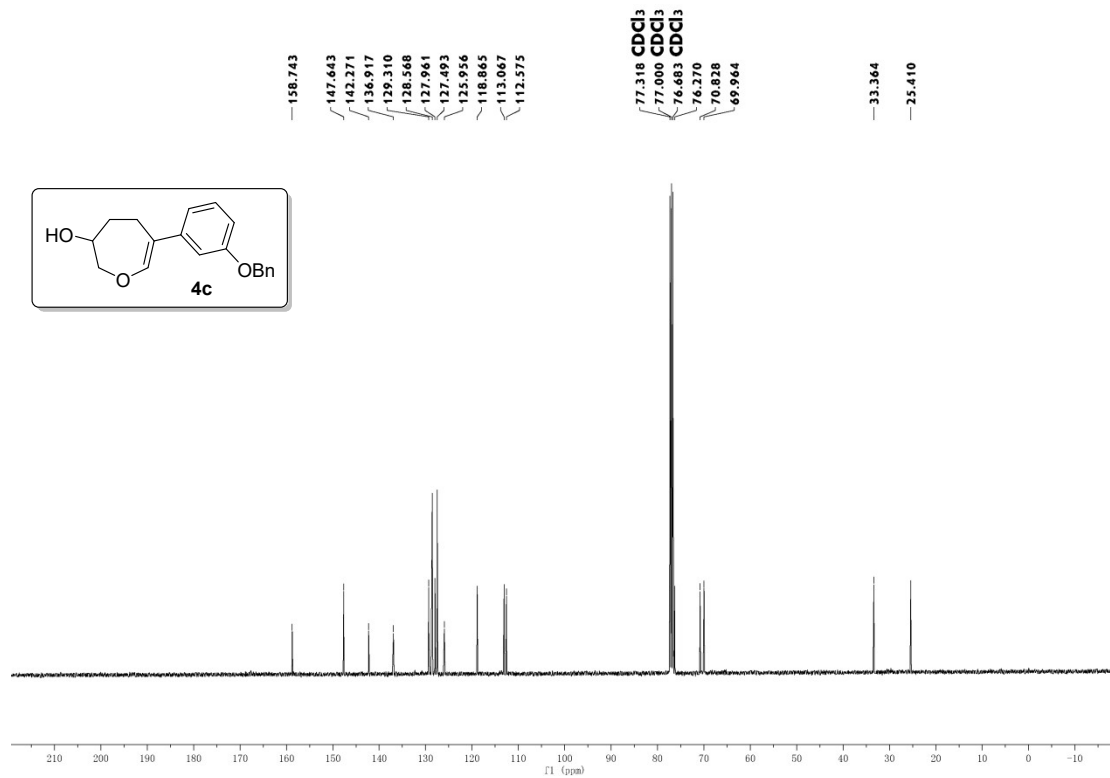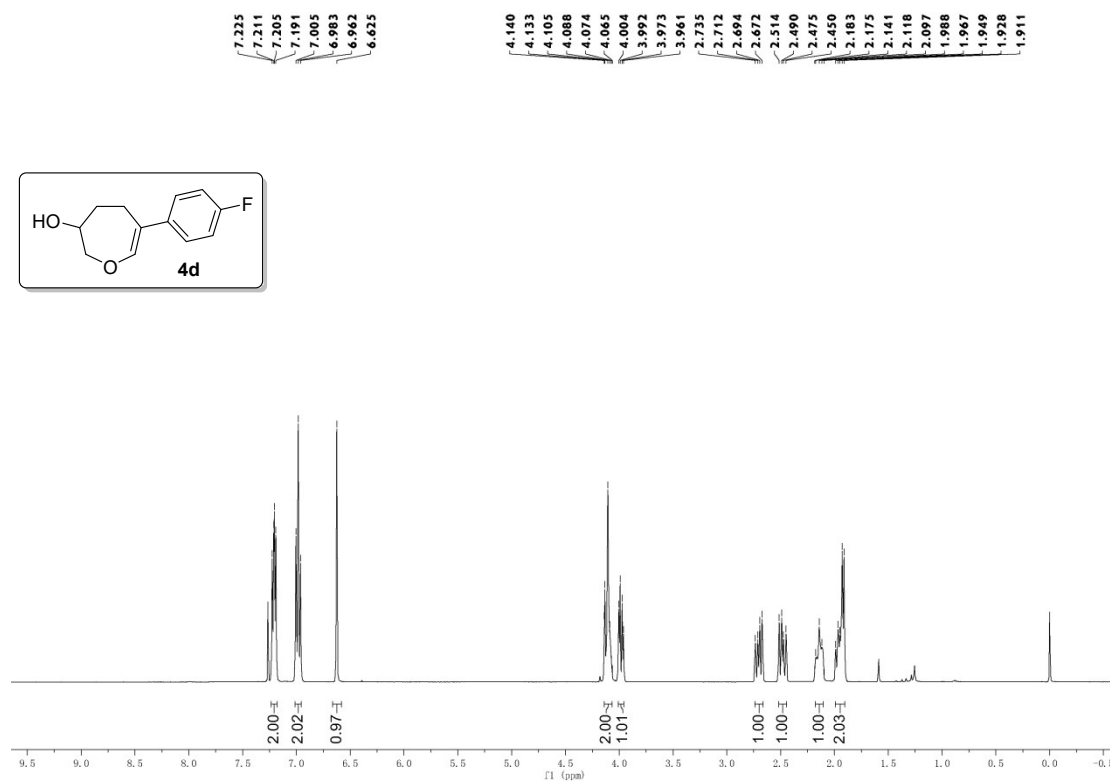

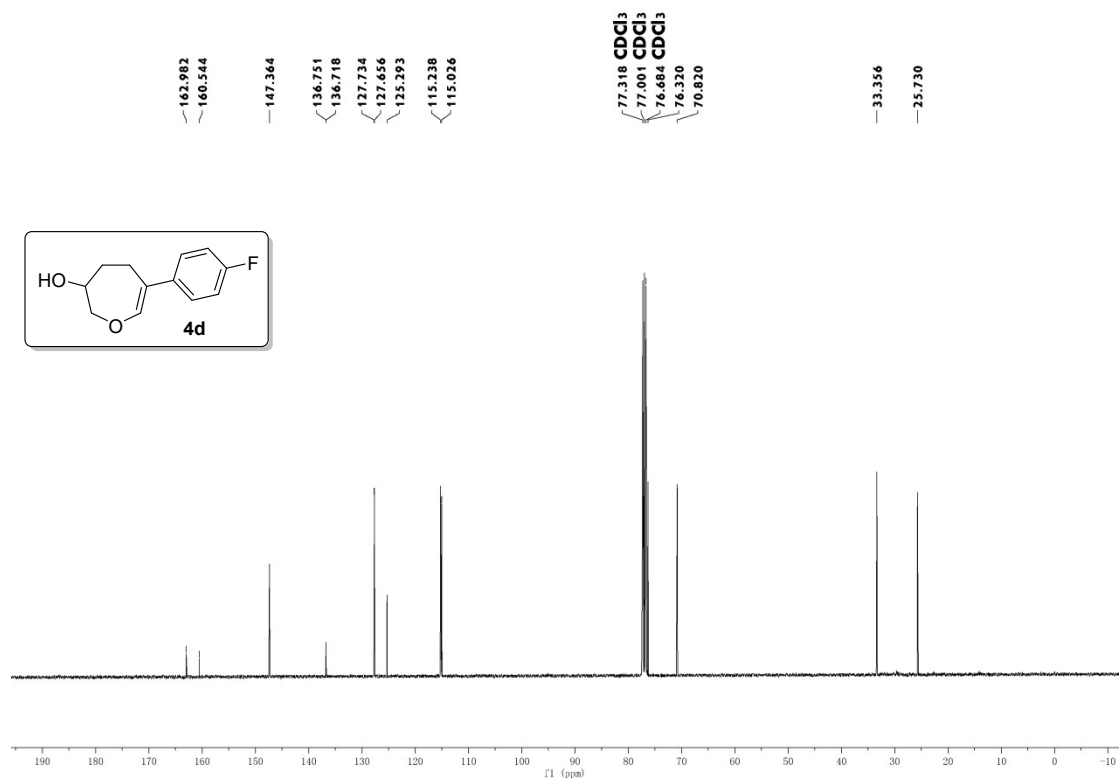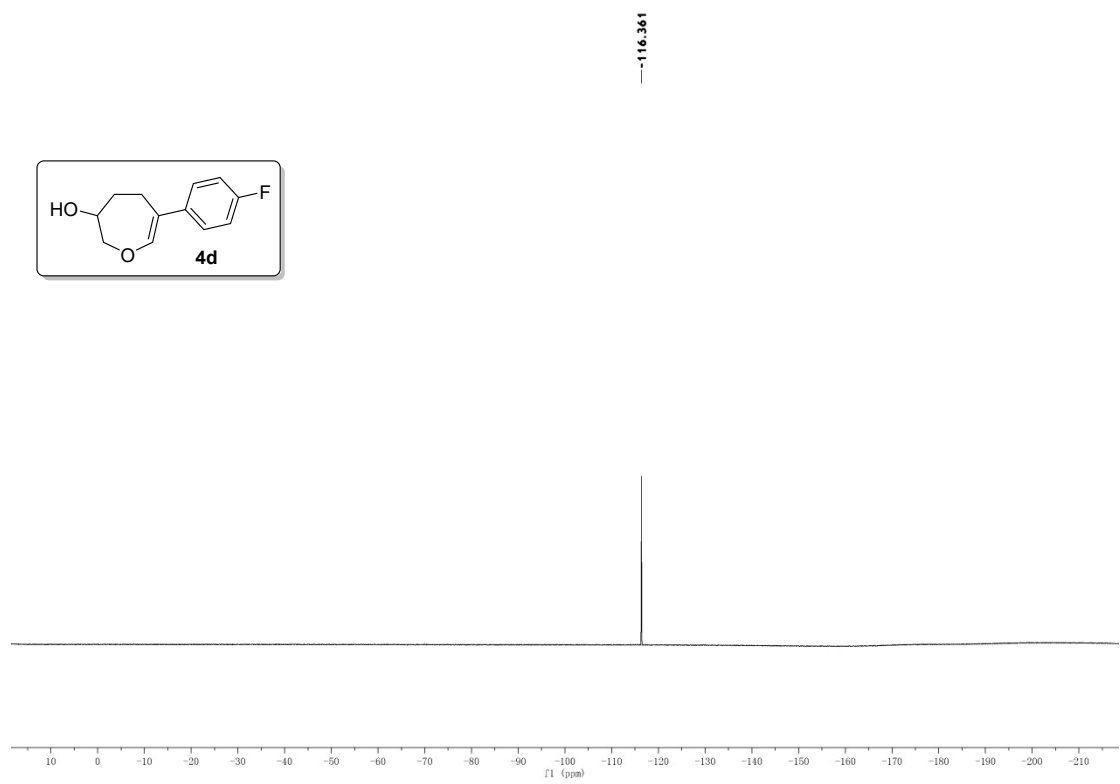

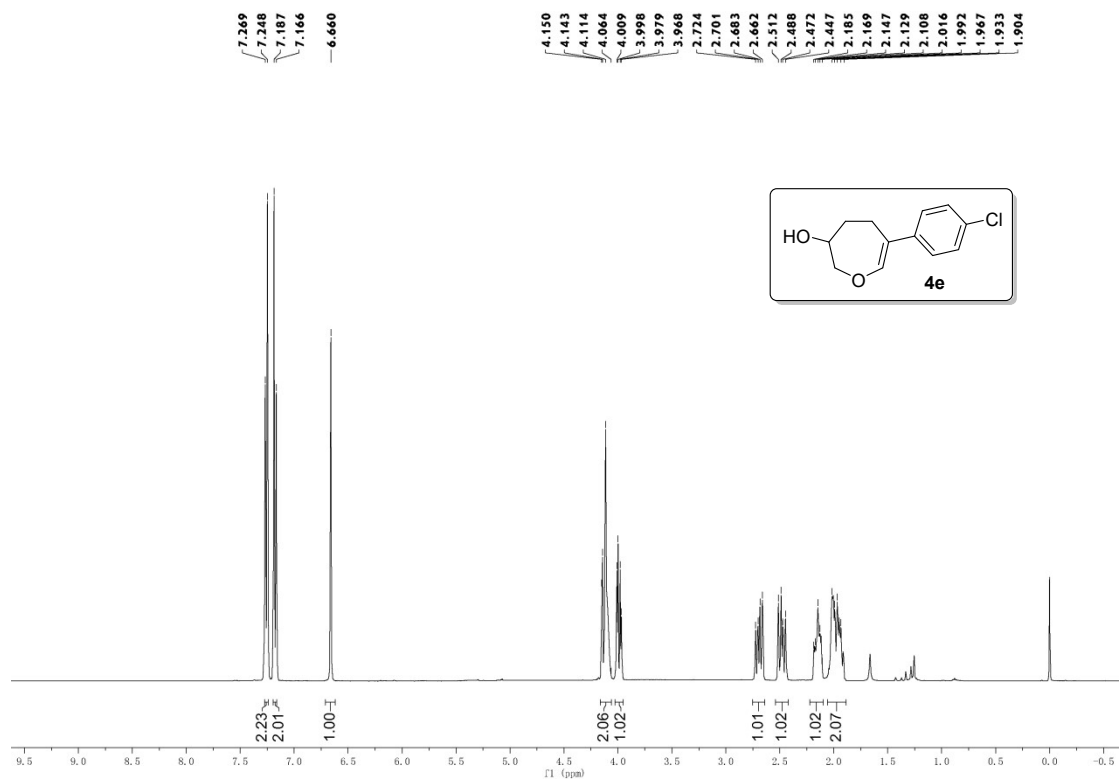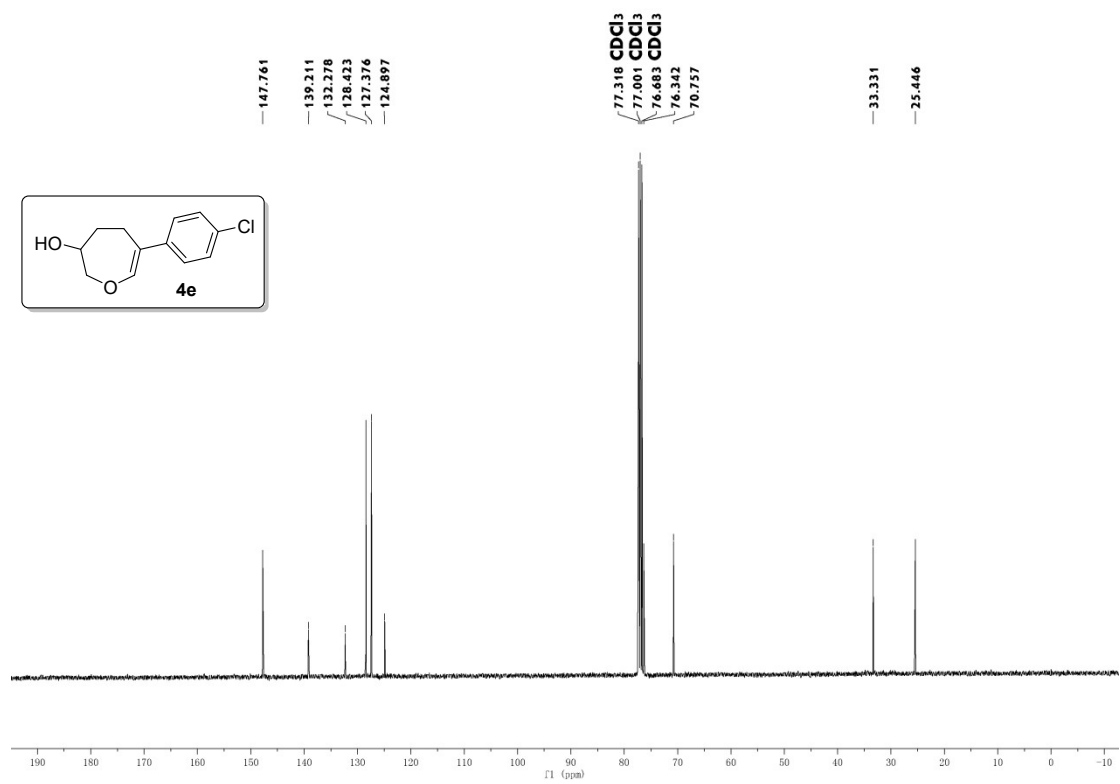



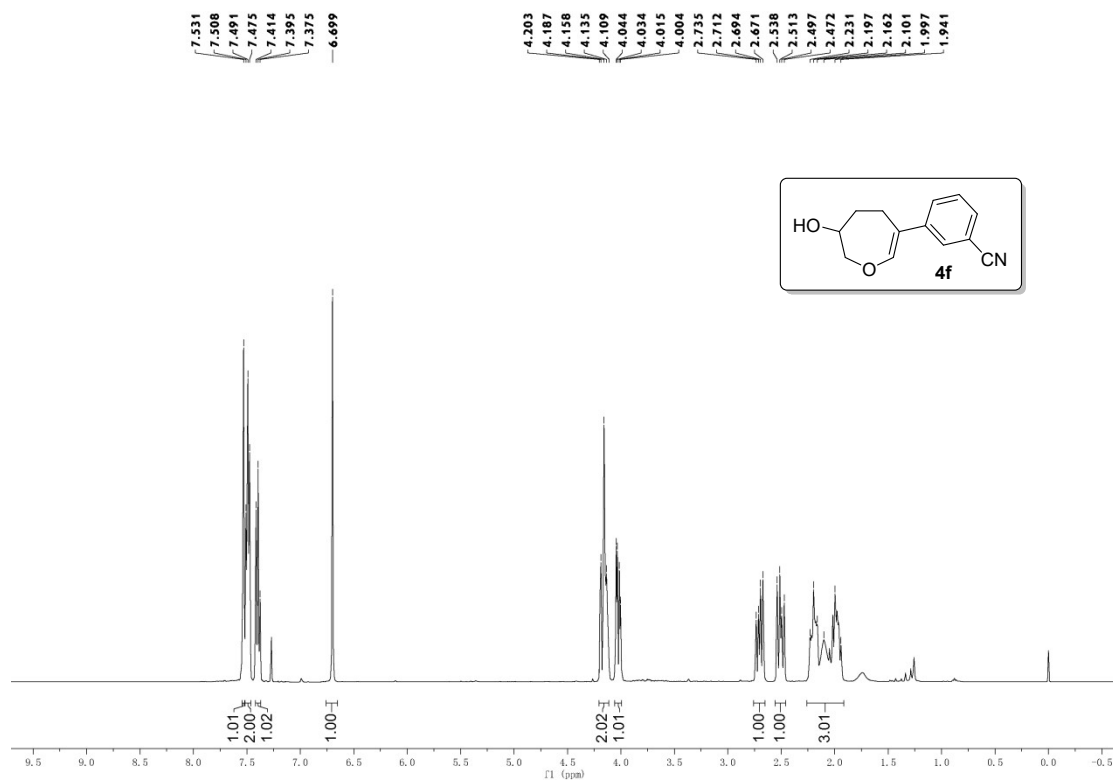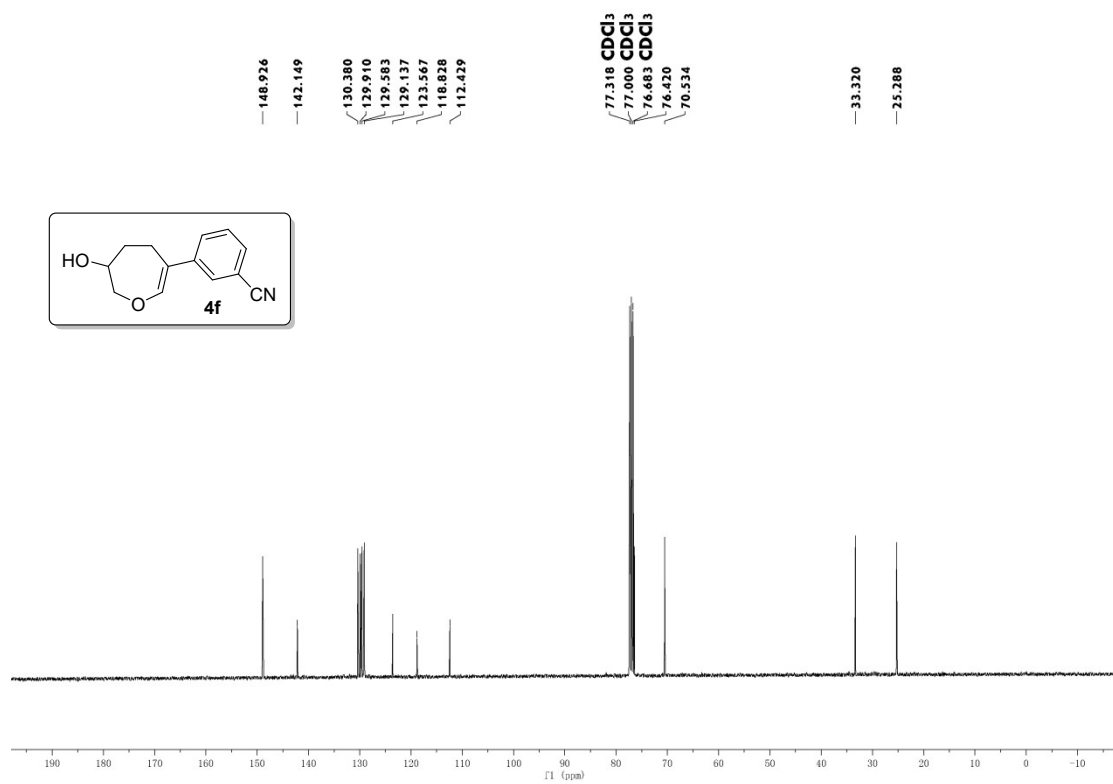

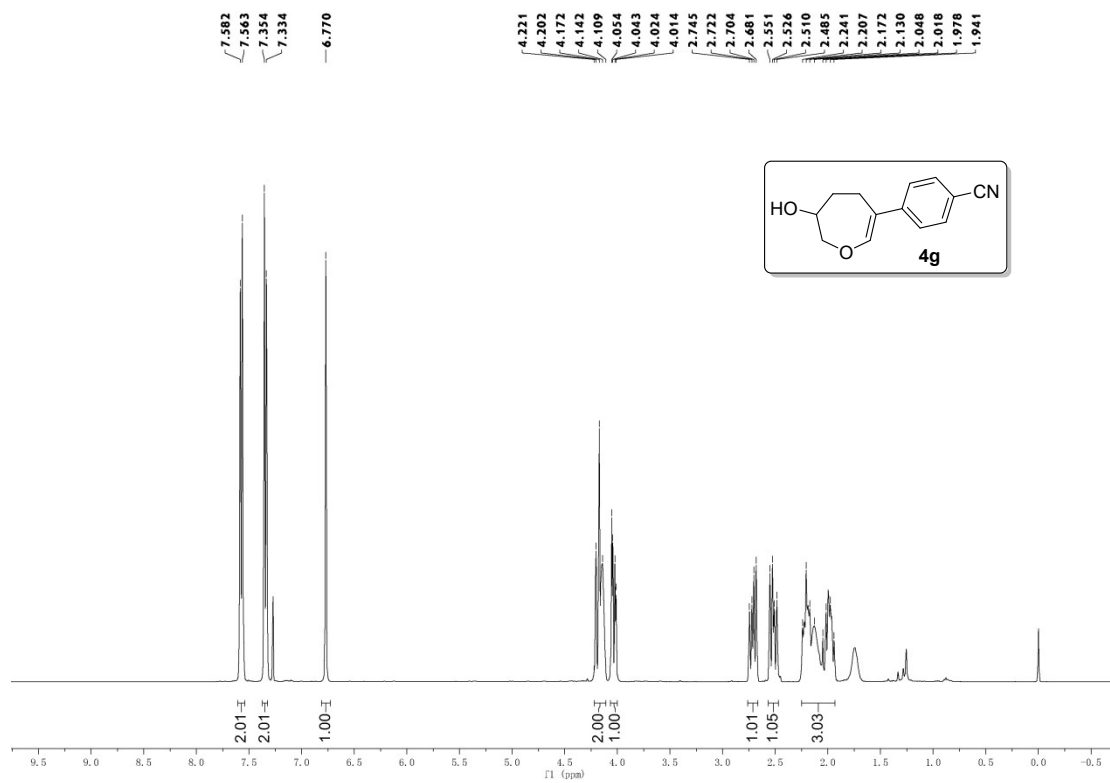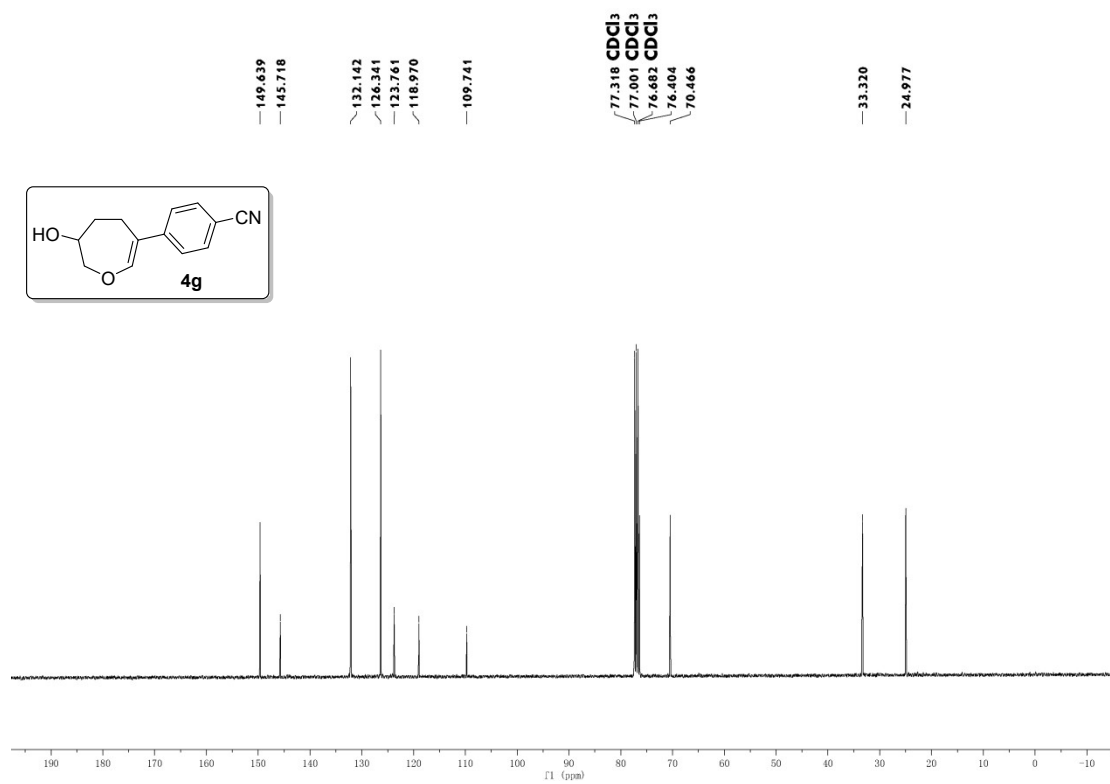

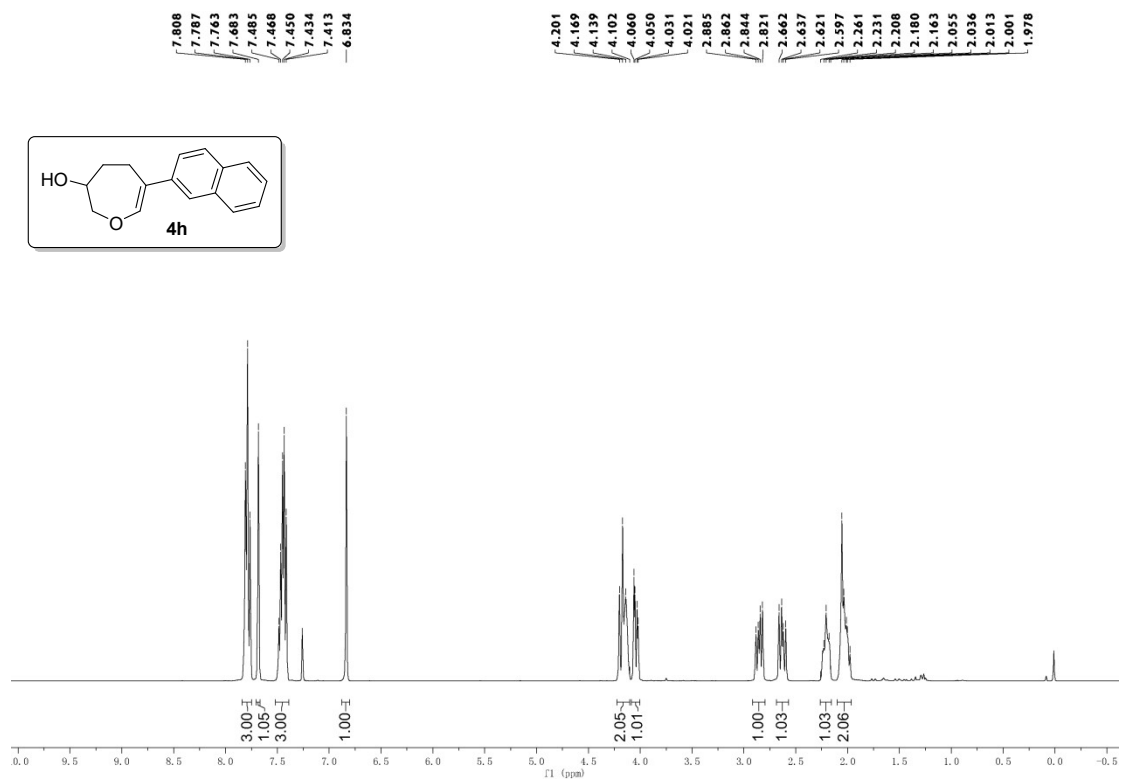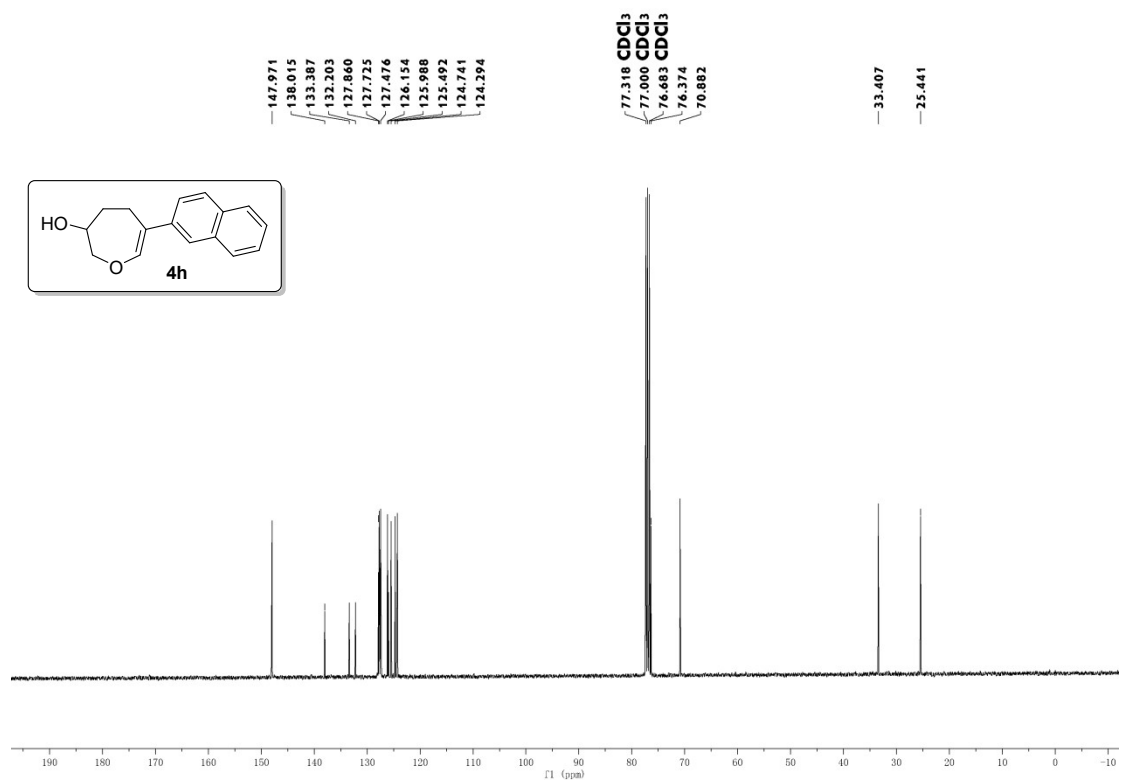

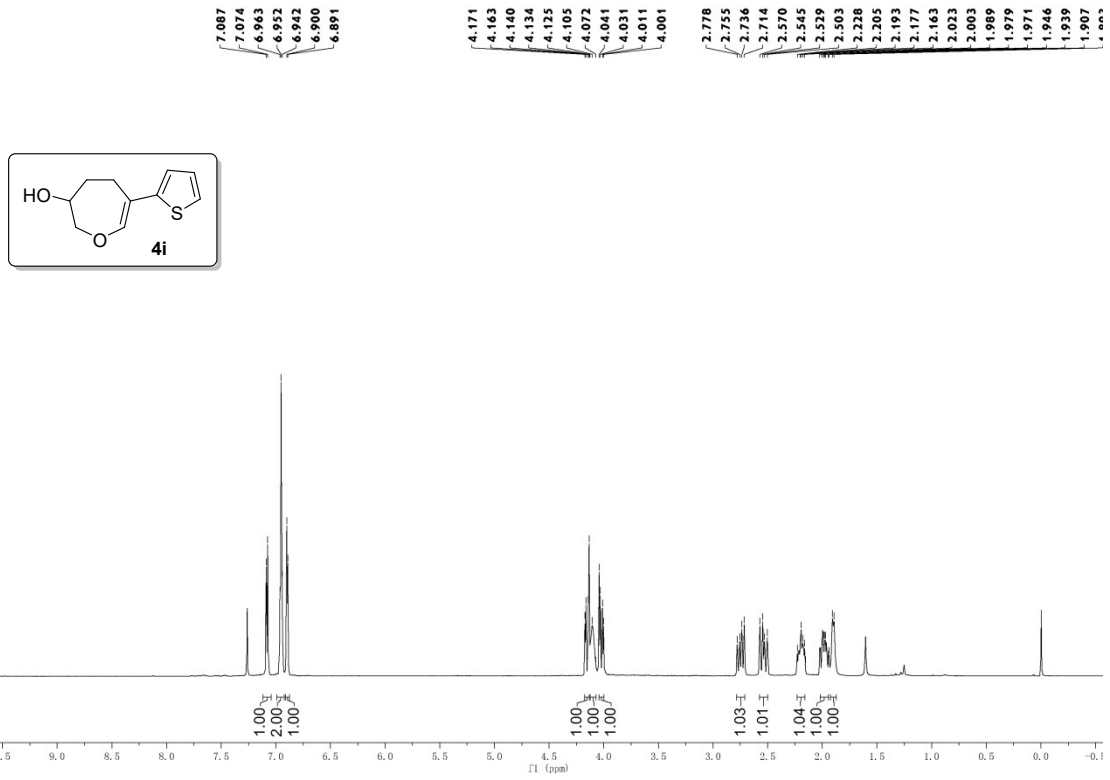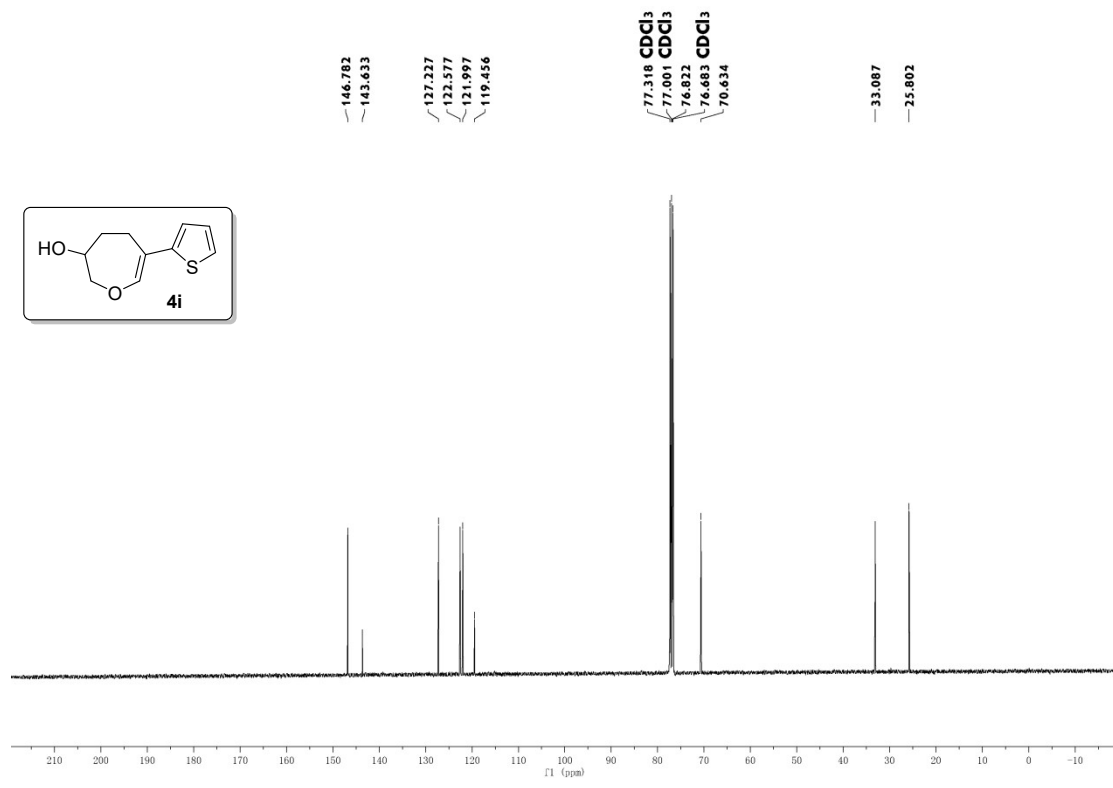

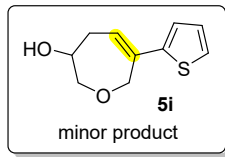

7.158  
 7.146  
 6.978  
 6.968  
 6.956  
 6.939  
 6.930  
 6.161  
 6.145  
 6.130  
 4.702  
 4.664  
 4.523  
 4.485  
 4.032  
 3.997  
 3.967  
 3.943  
 3.934  
 2.782  
 2.764  
 2.744  
 2.726  
 2.708  
 2.666  
 2.661  
 2.651  
 2.646  
 2.627  
 2.622  
 2.613  
 2.609  
 2.194  
 2.174

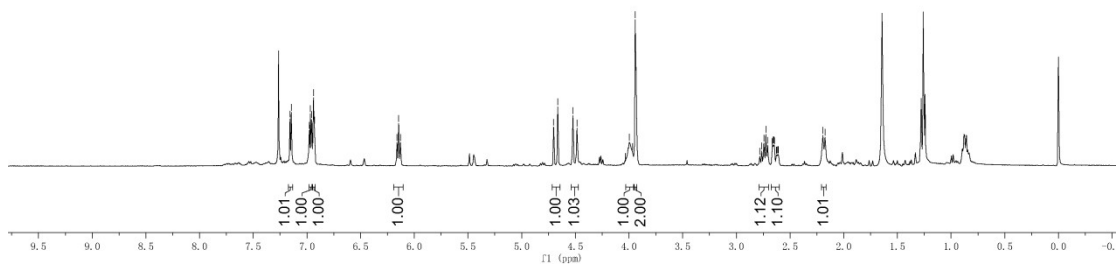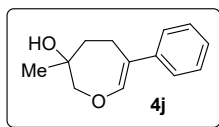

7.320  
 7.300  
 7.282  
 7.264  
 7.245  
 7.222  
 7.204  
 6.688  
 3.920  
 3.890  
 3.812  
 3.782  
 2.782  
 2.756  
 2.741  
 2.715  
 2.501  
 2.483  
 2.480  
 2.464  
 2.460  
 2.443  
 2.439  
 2.261  
 2.026  
 1.995  
 1.973  
 1.912  
 1.908  
 1.880  
 1.852  
 1.840  
 1.260

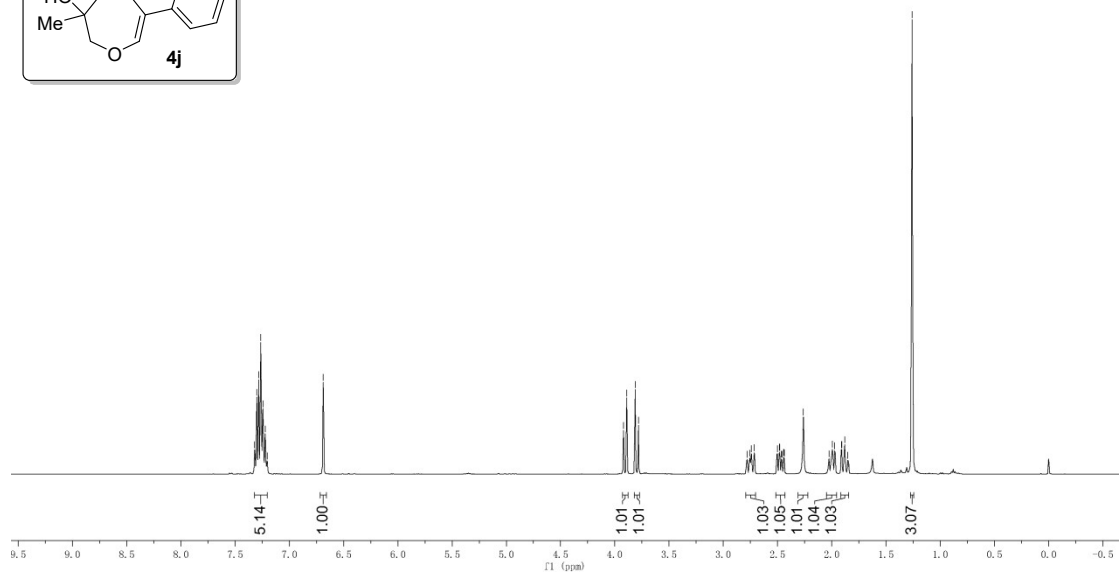

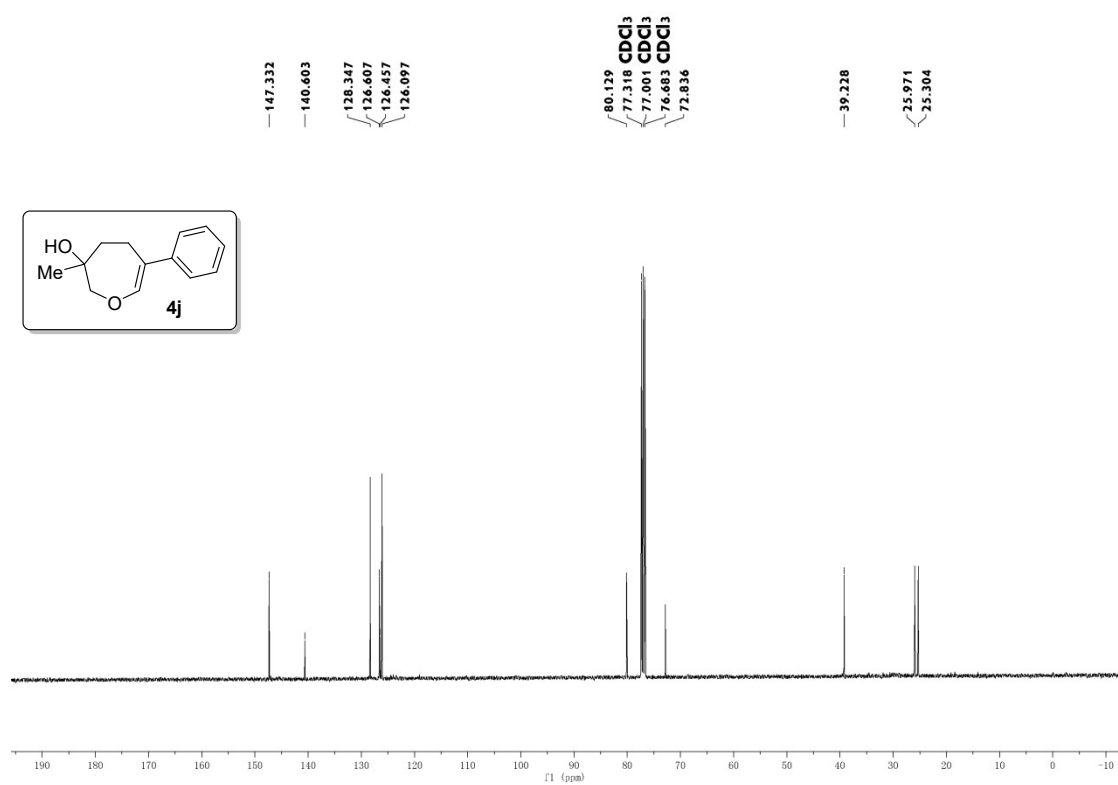

## 14. Copies of the NMR Spectra for Partial Materials

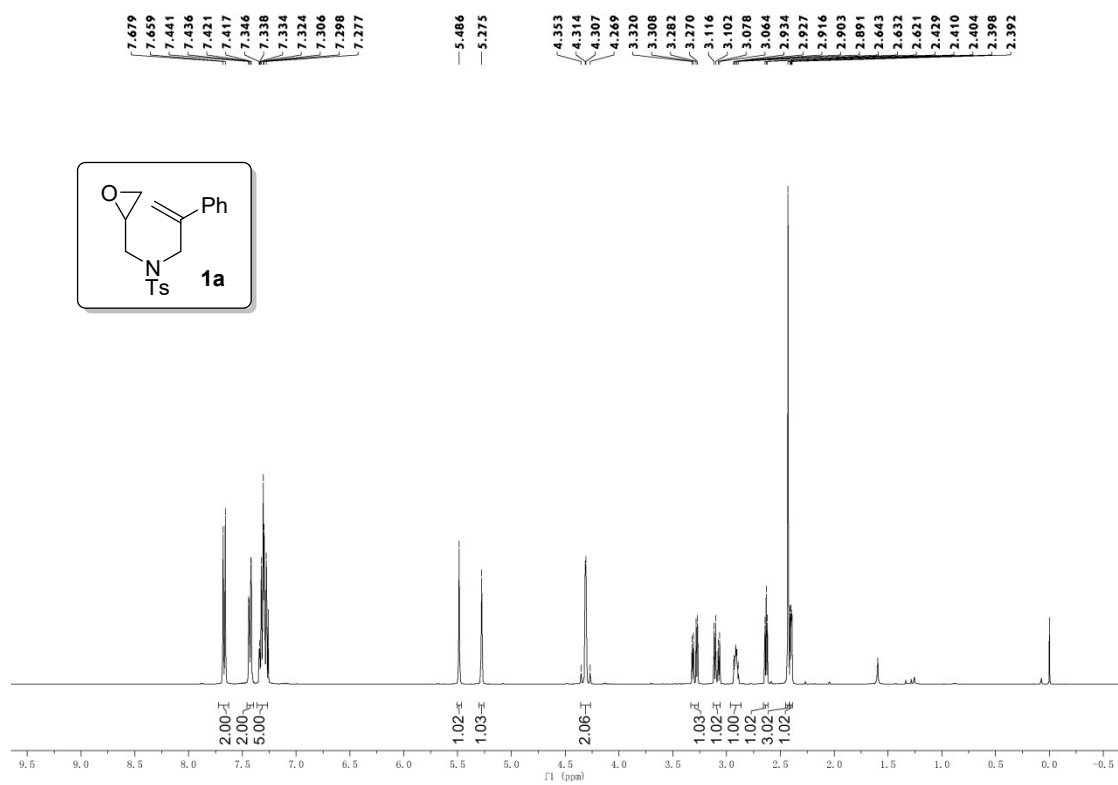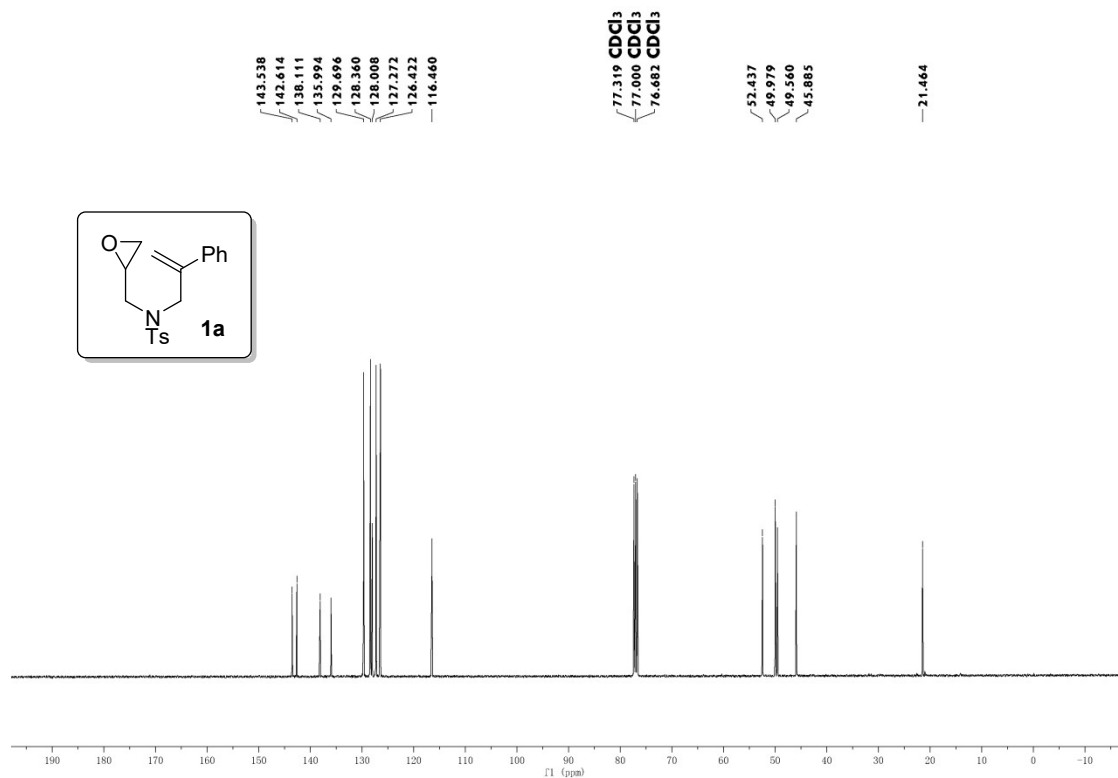

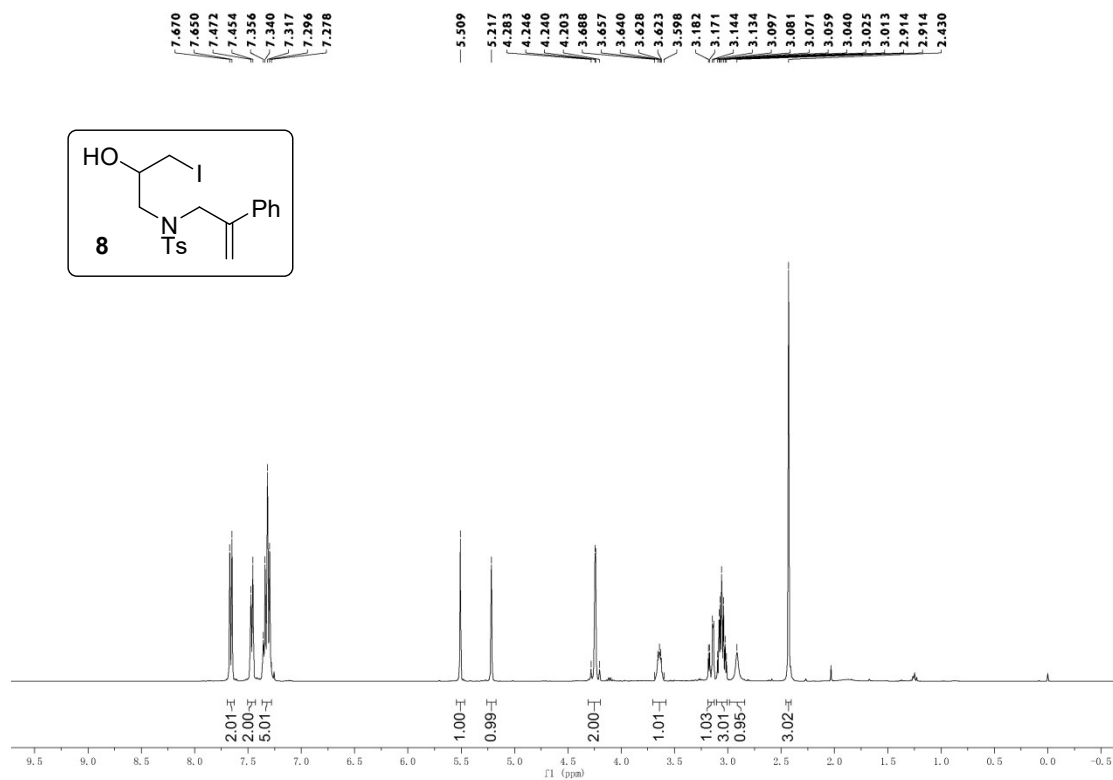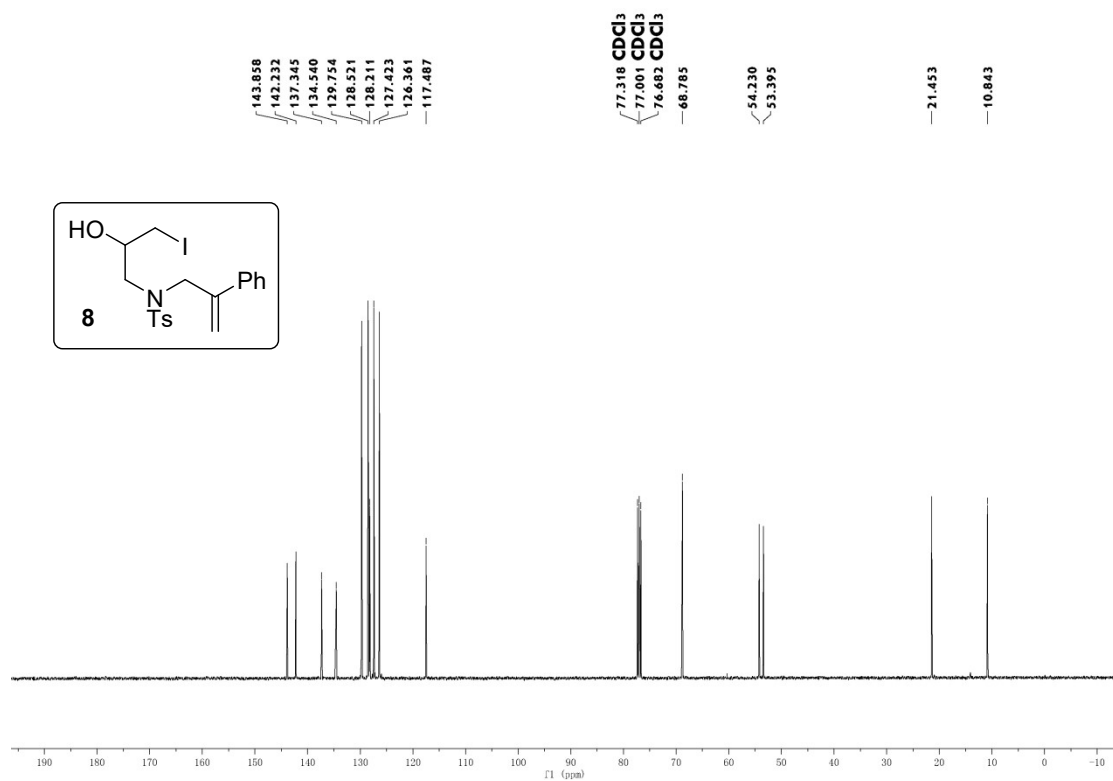



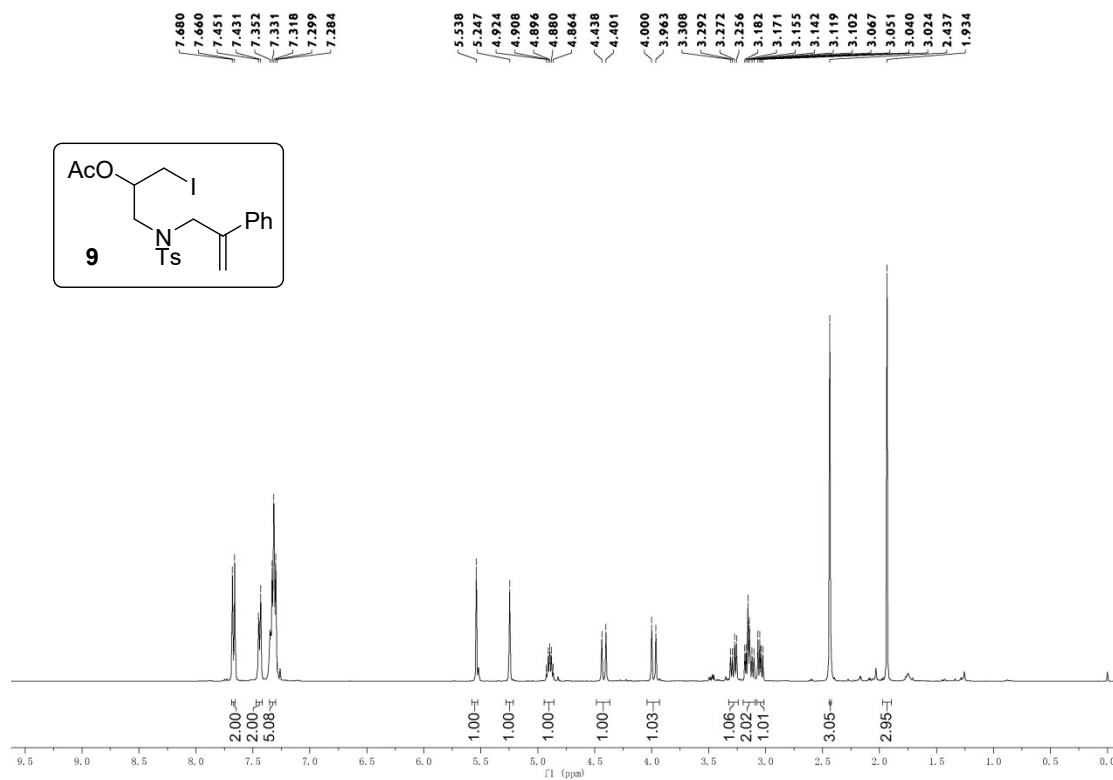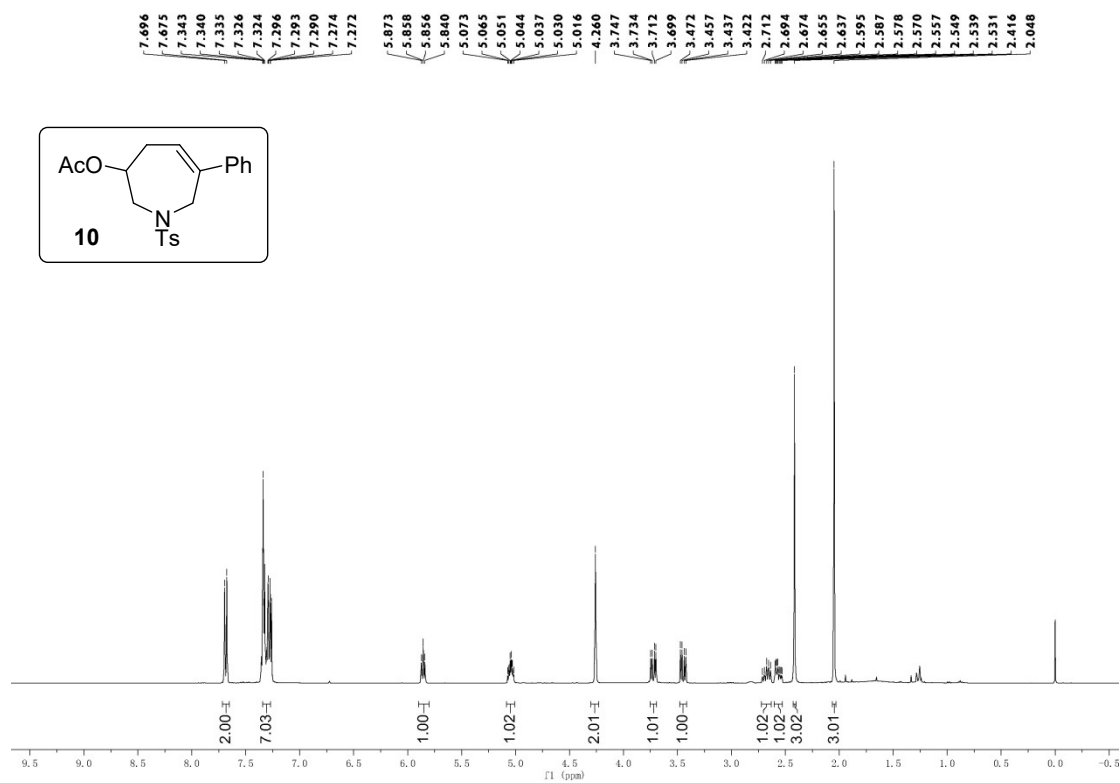

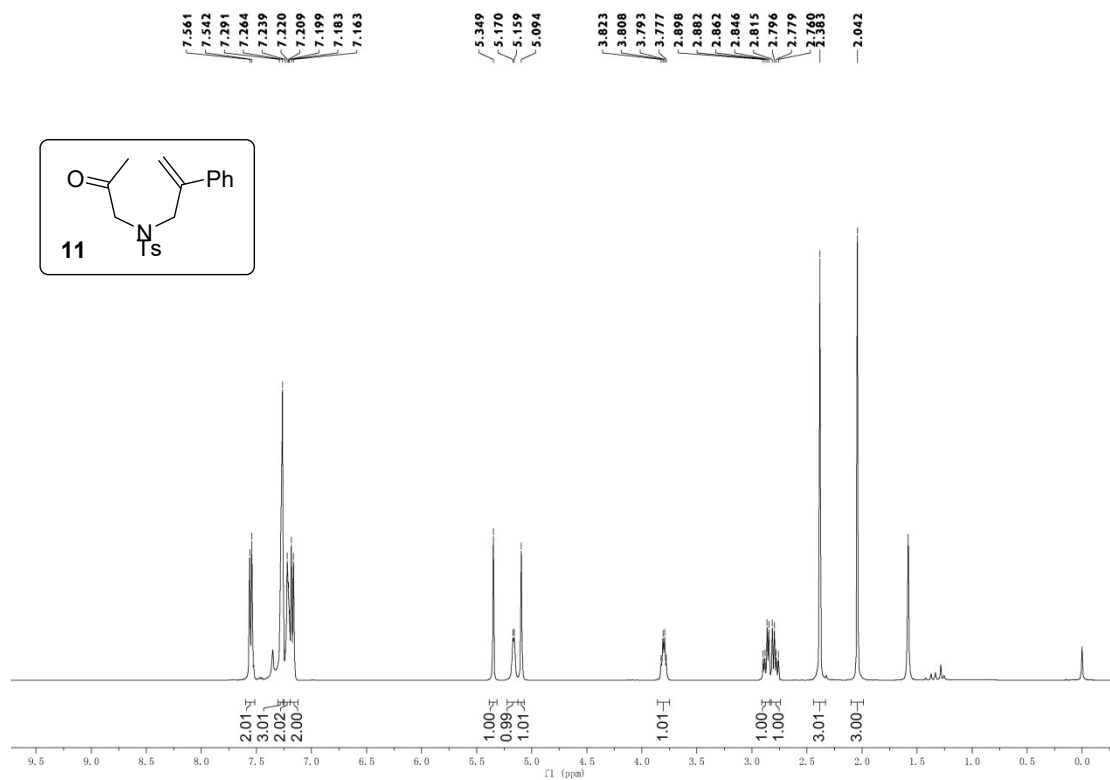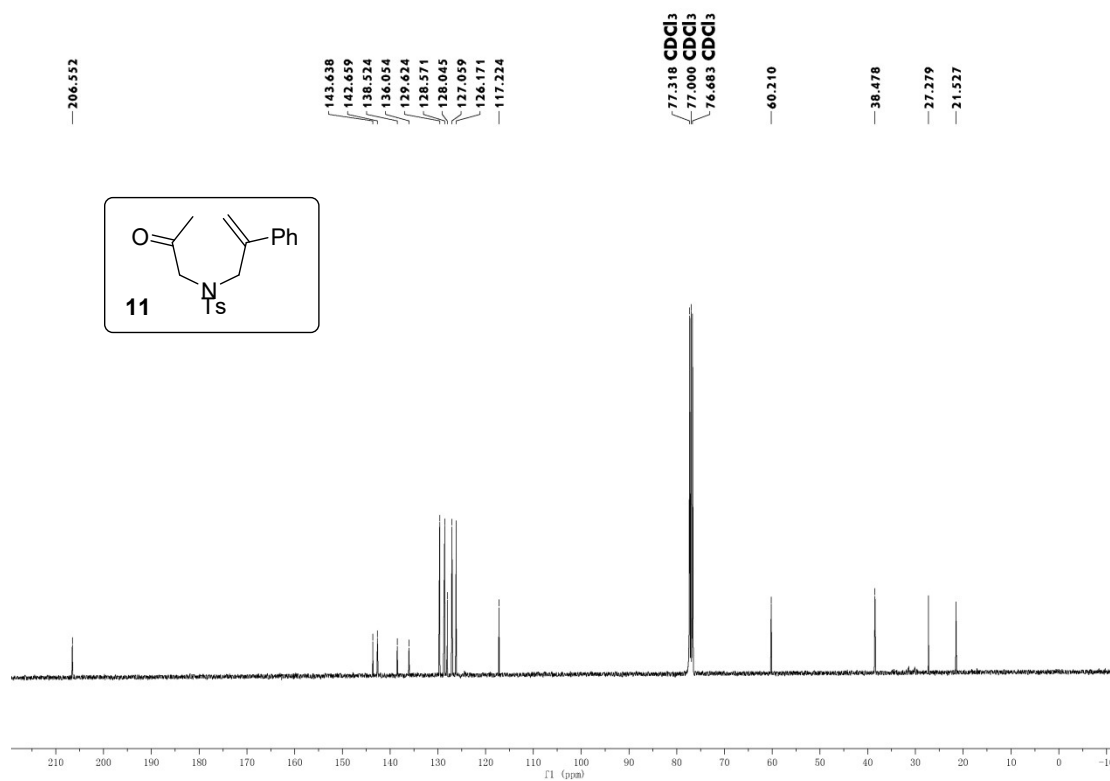

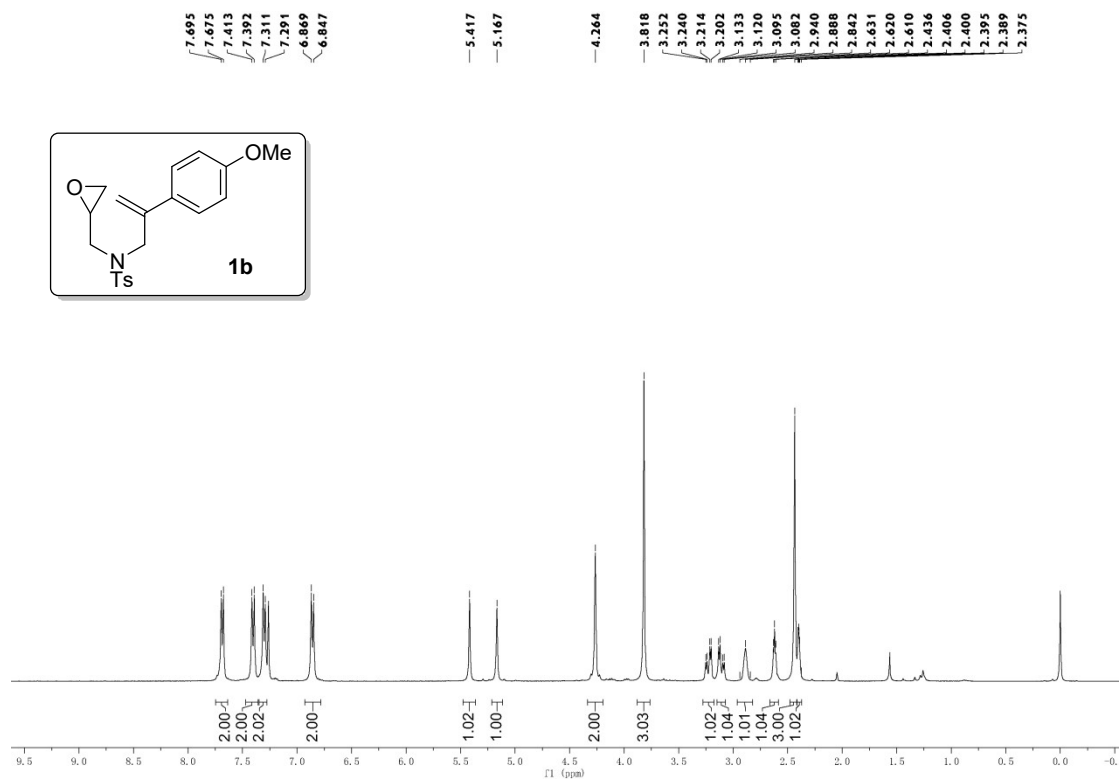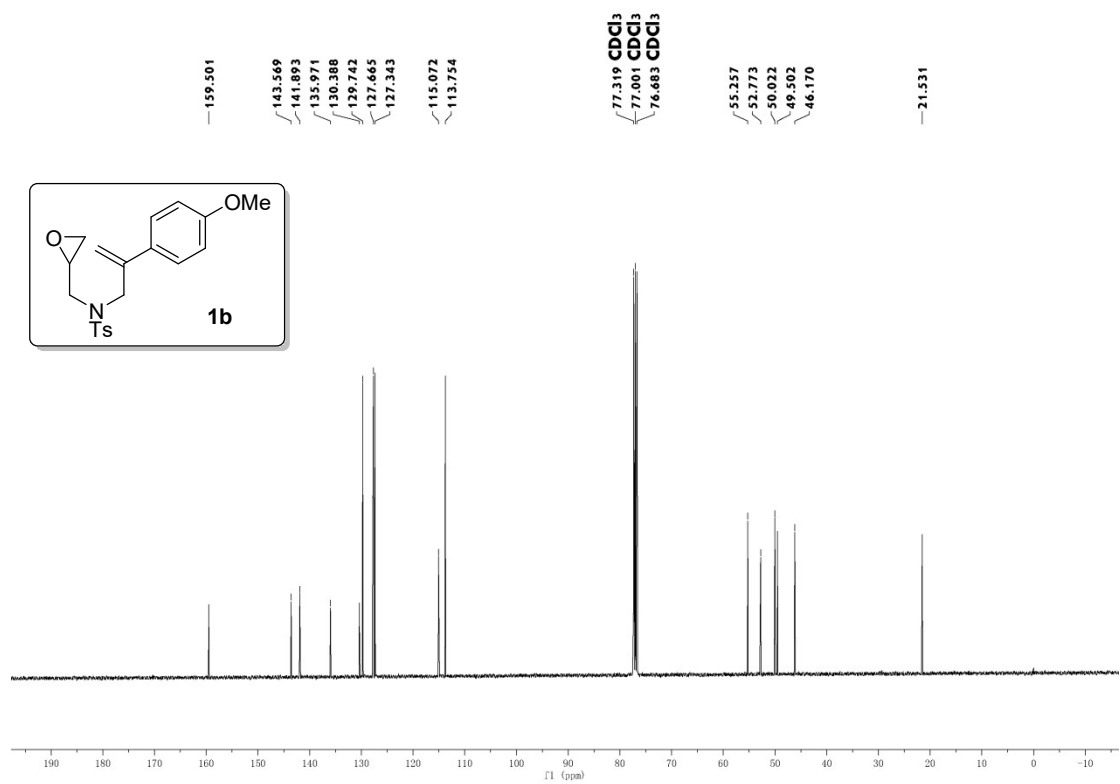

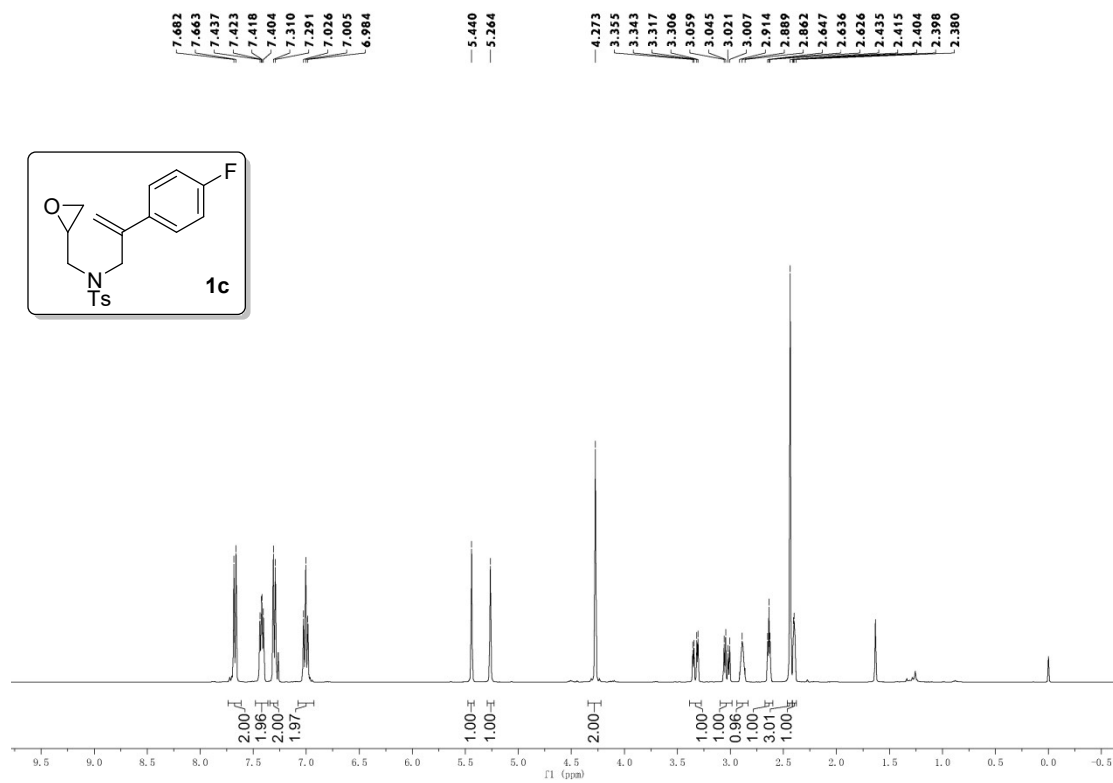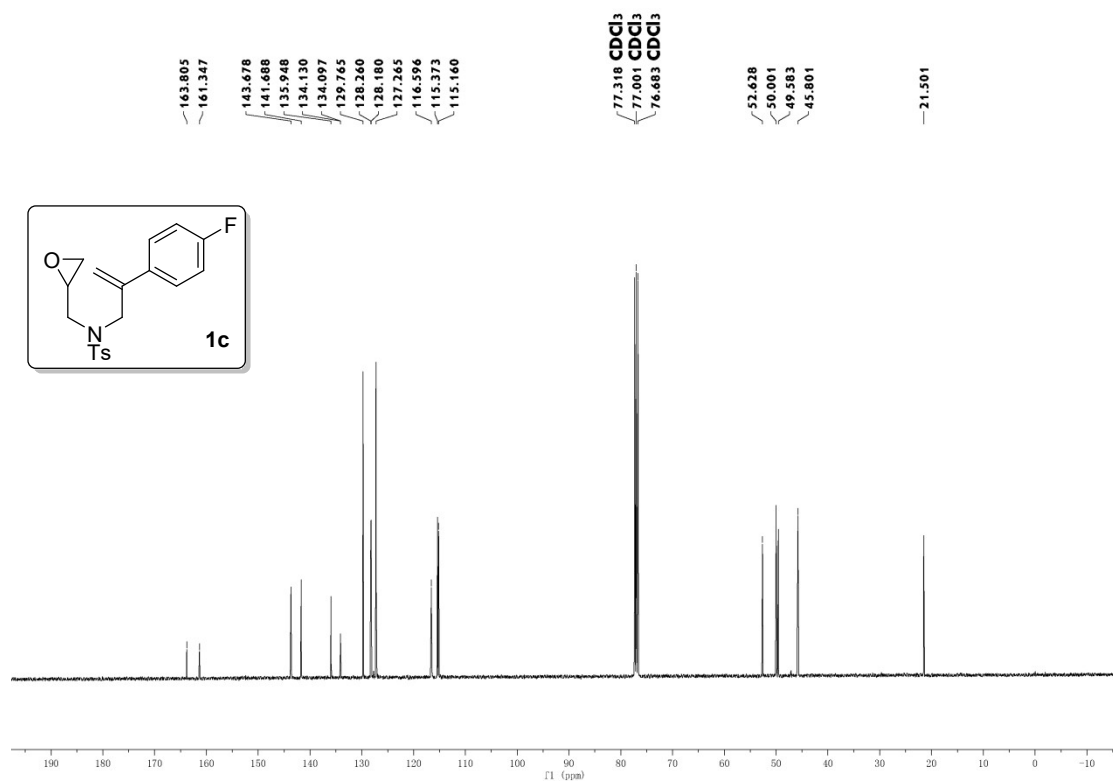

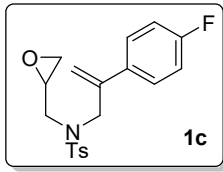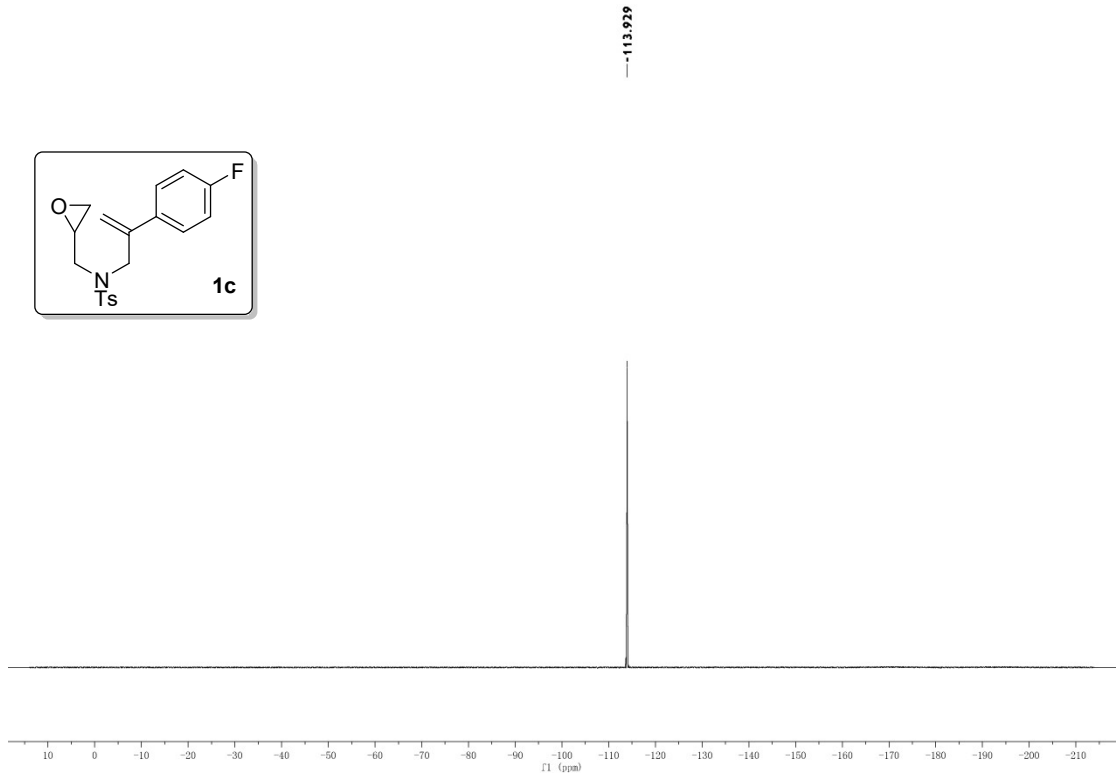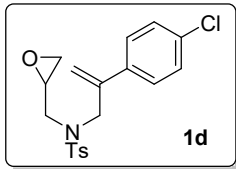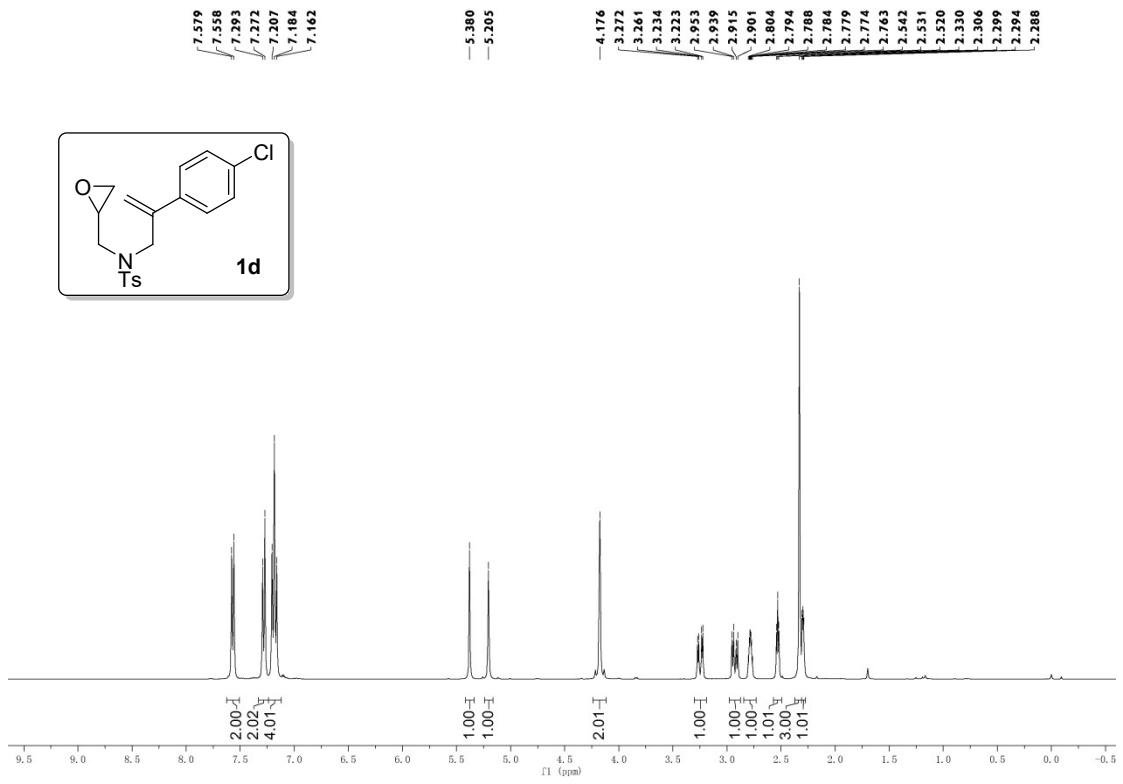

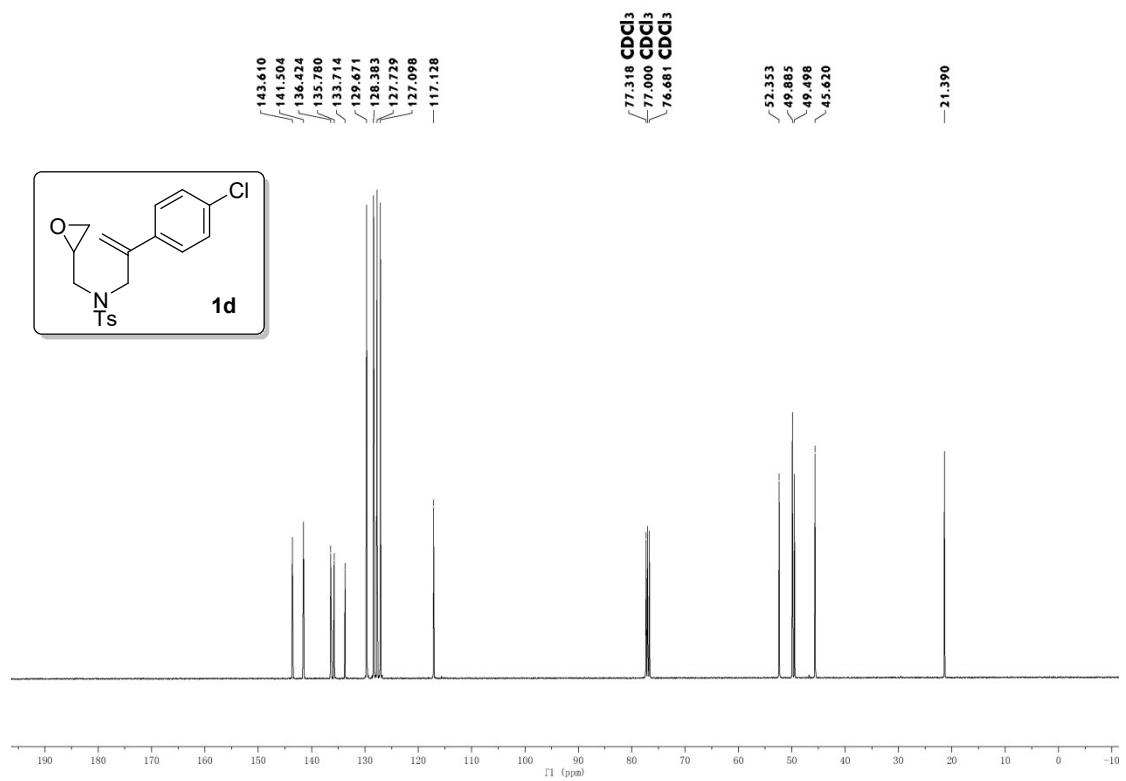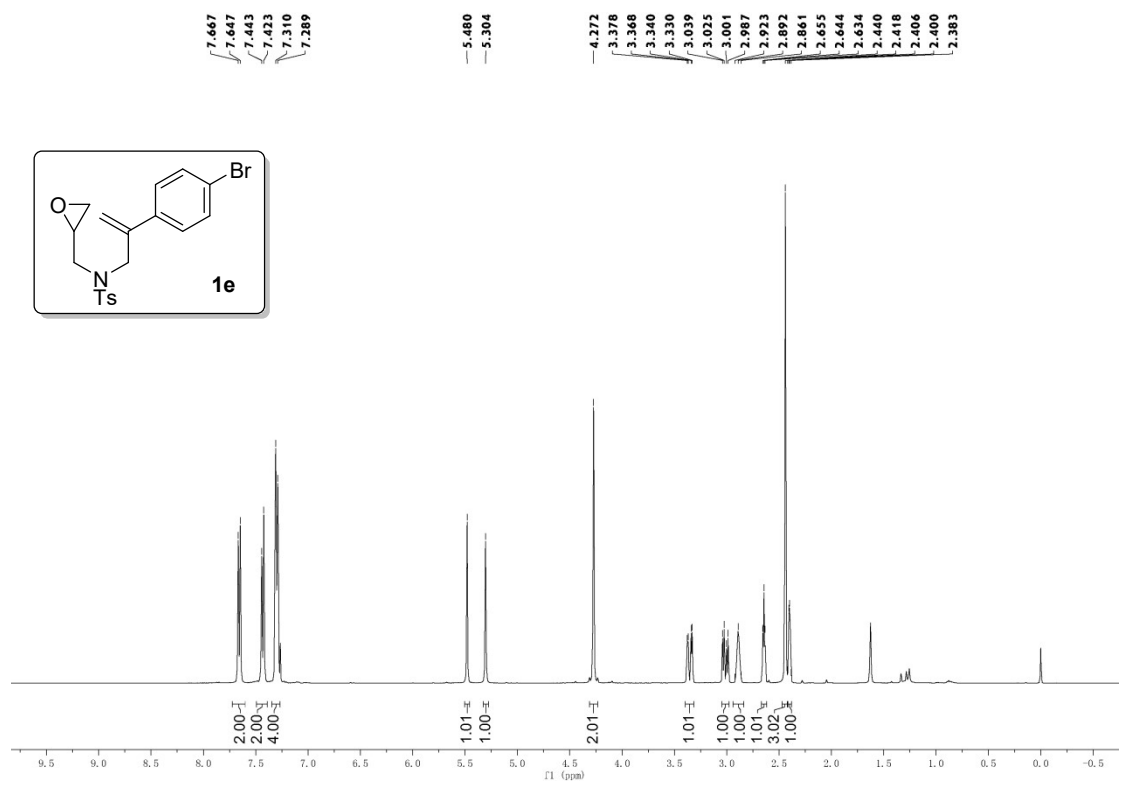

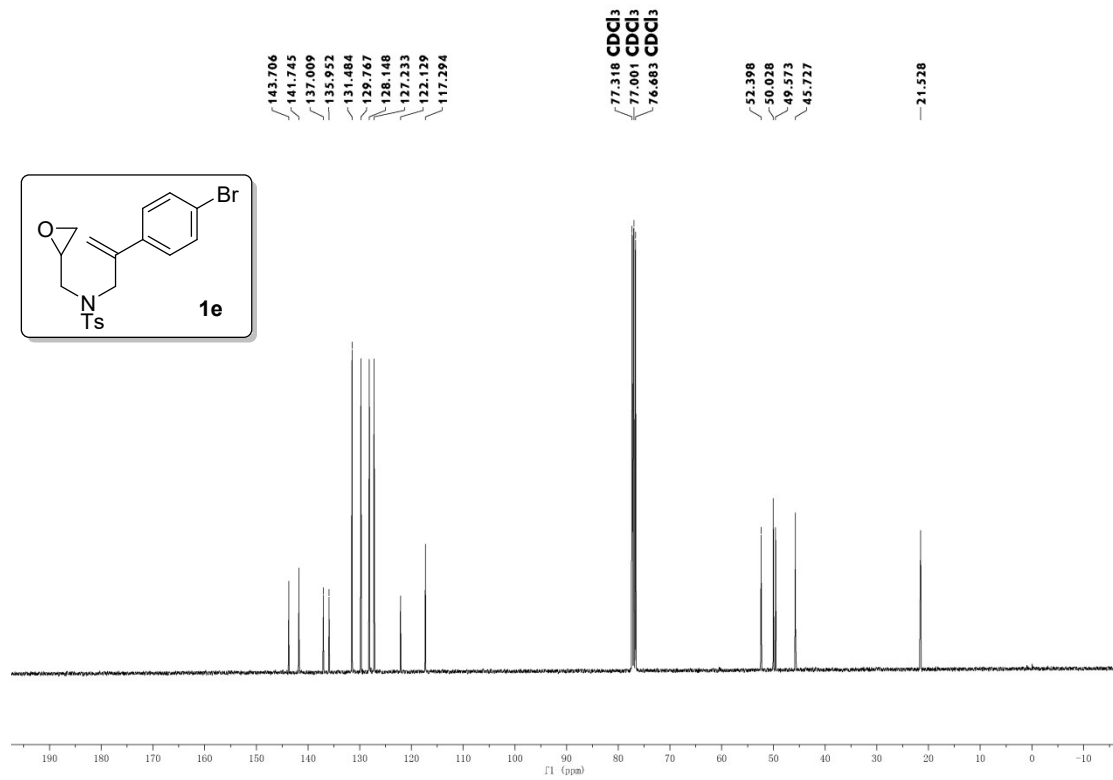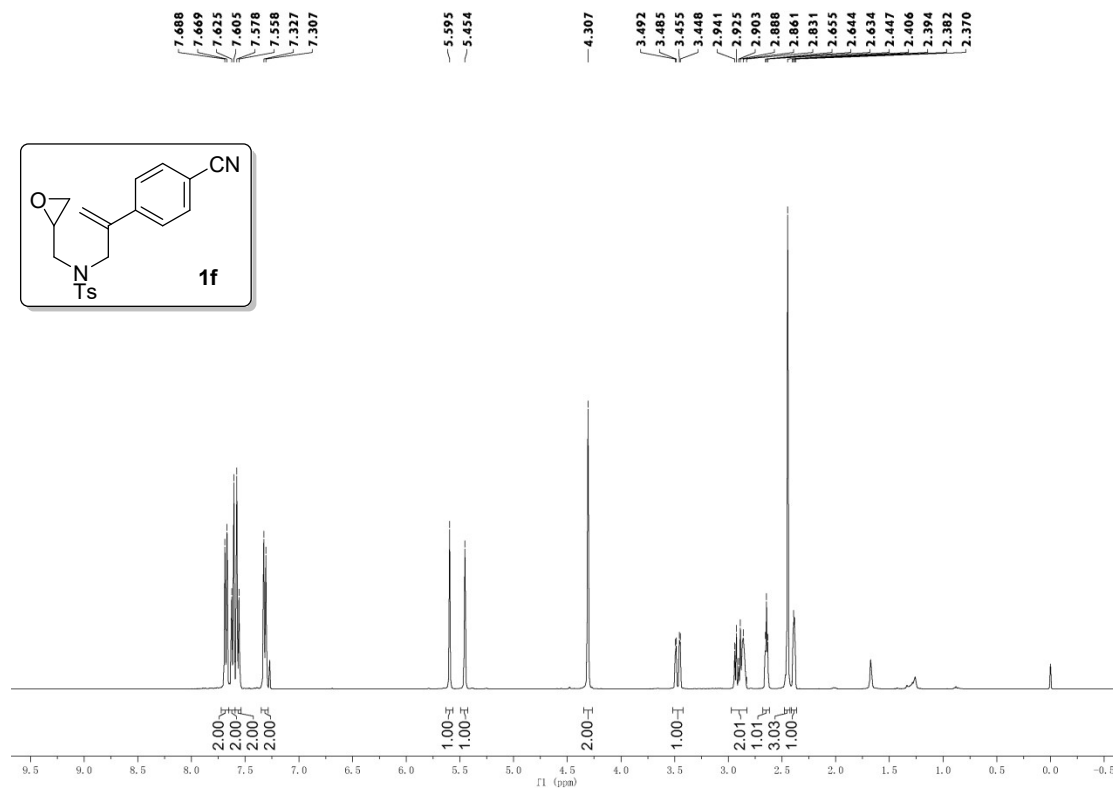





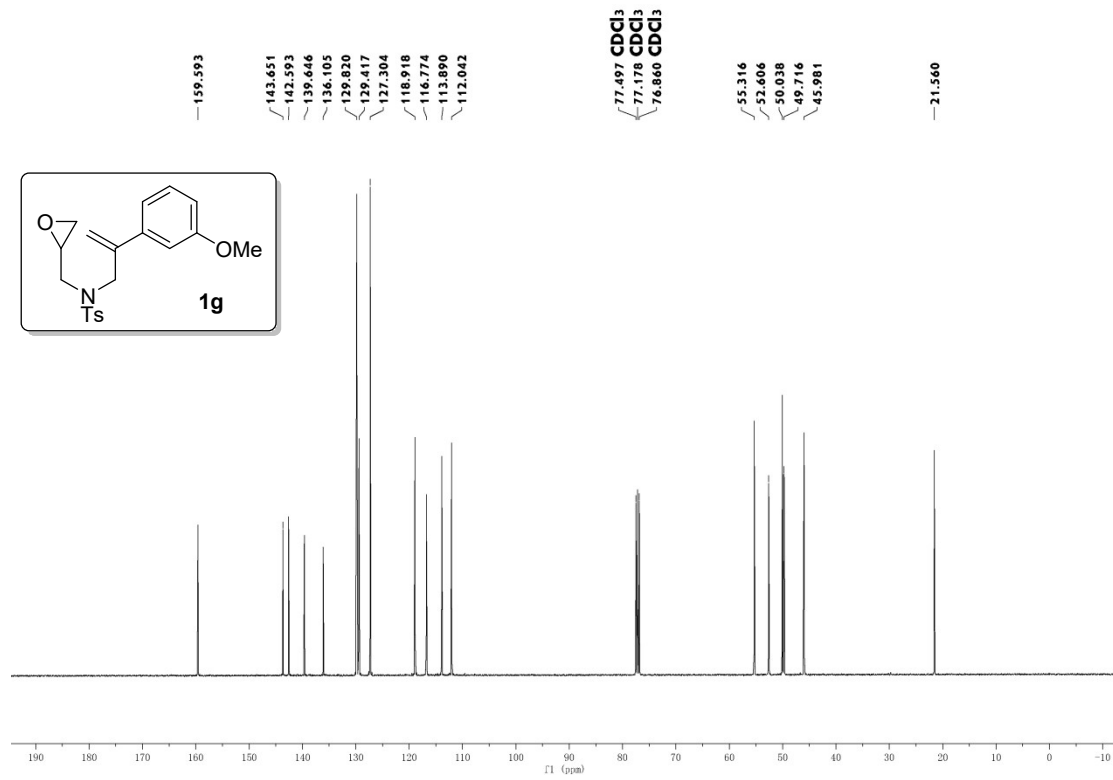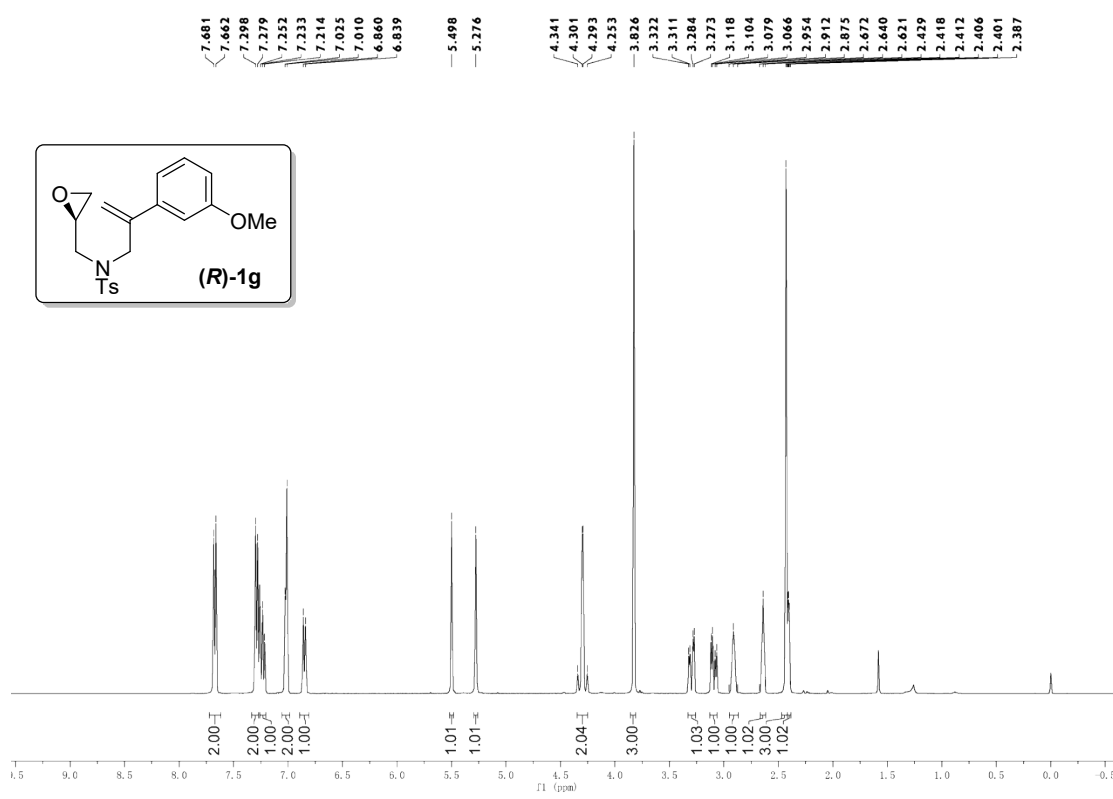

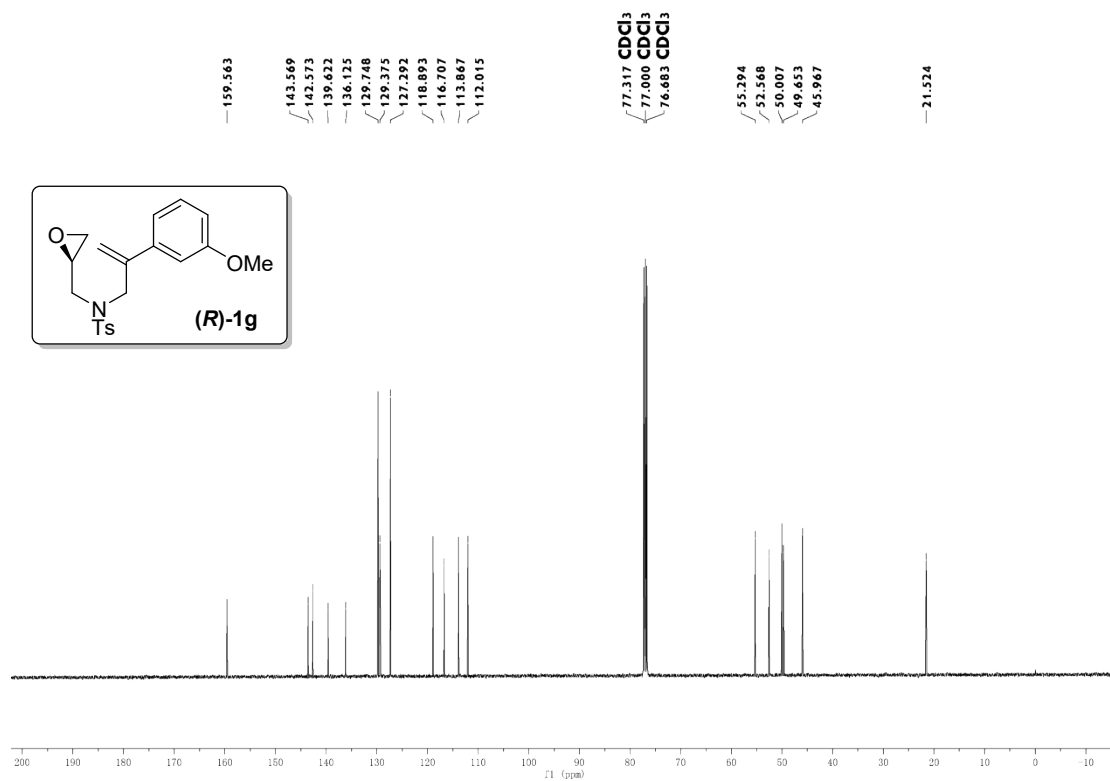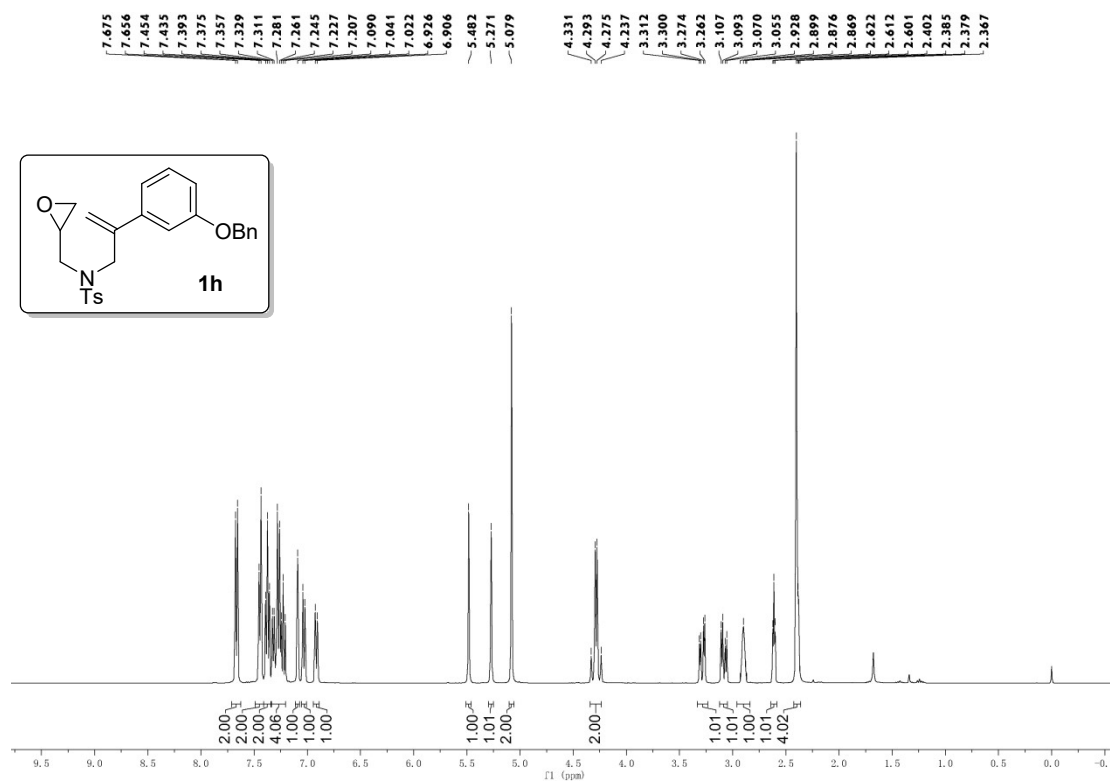

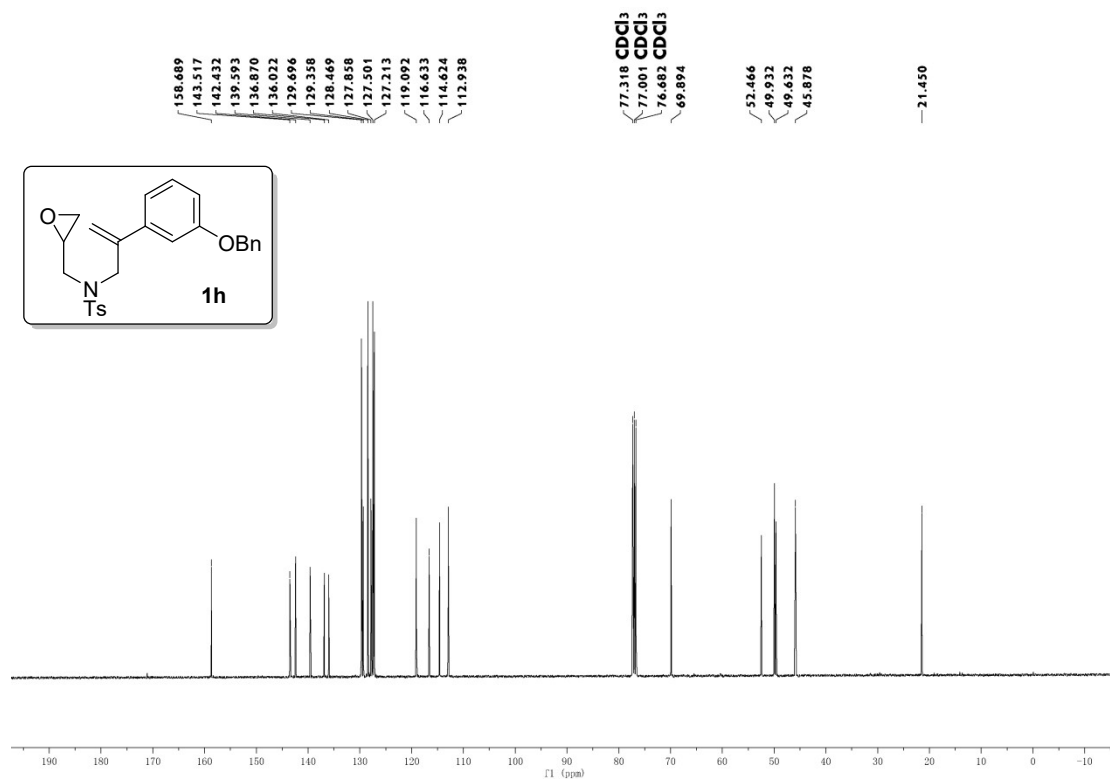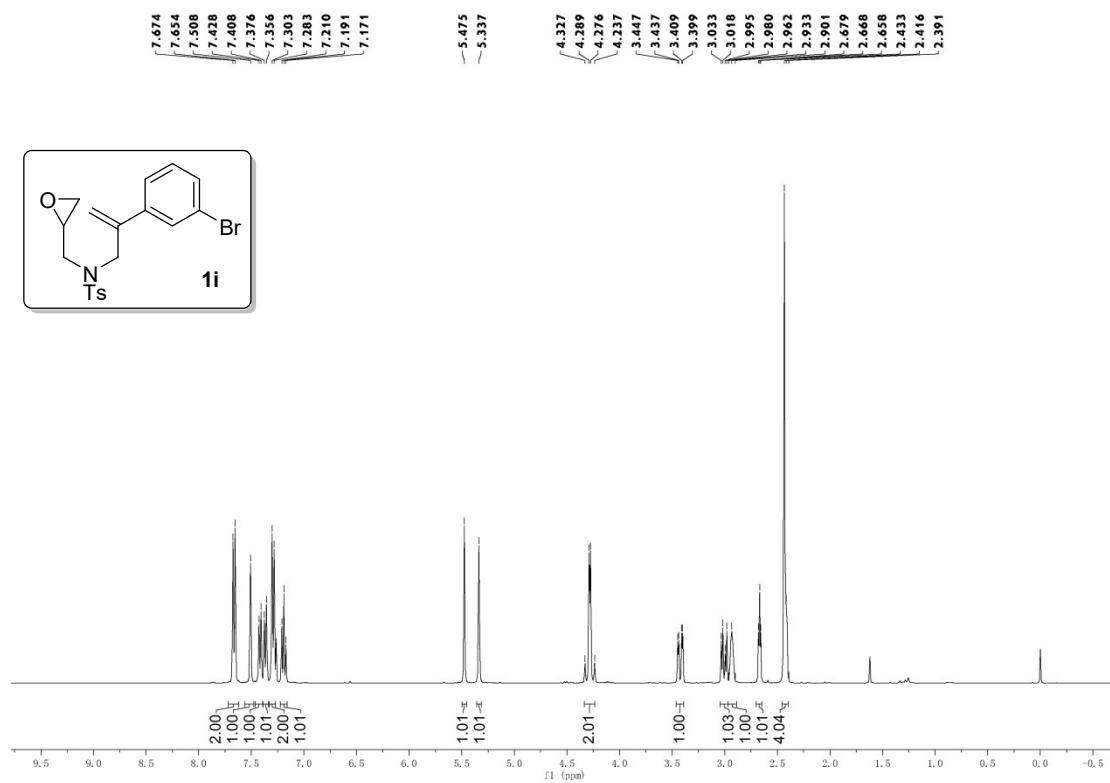

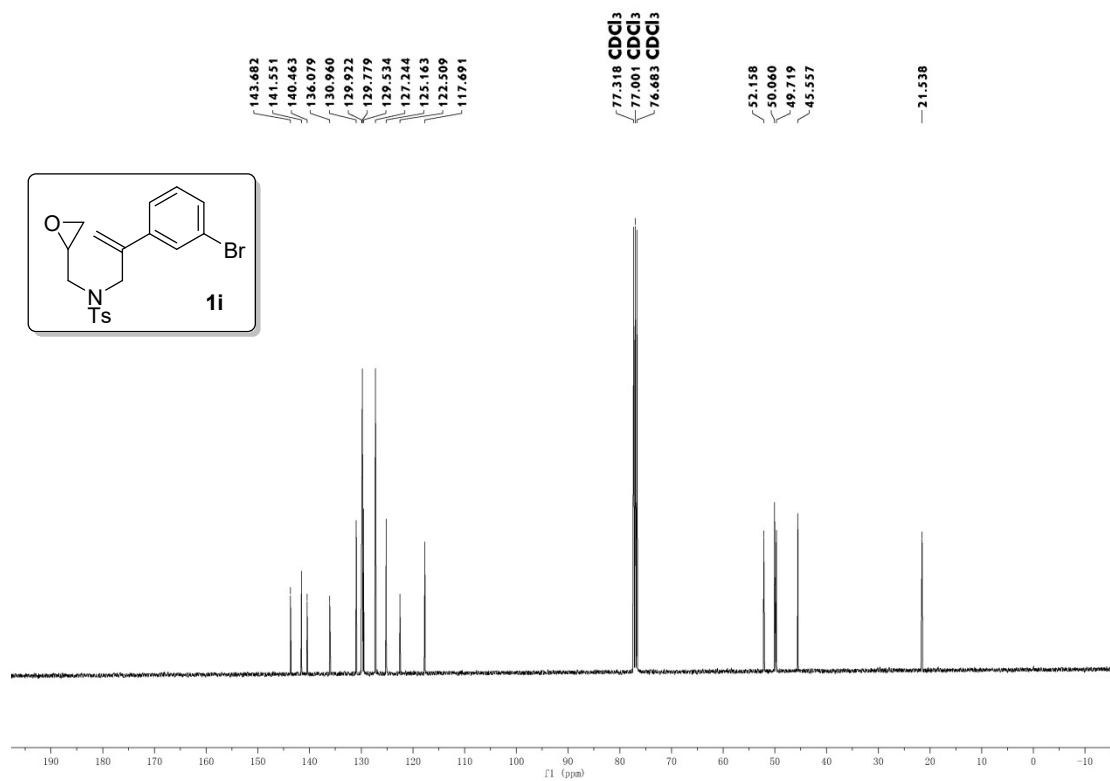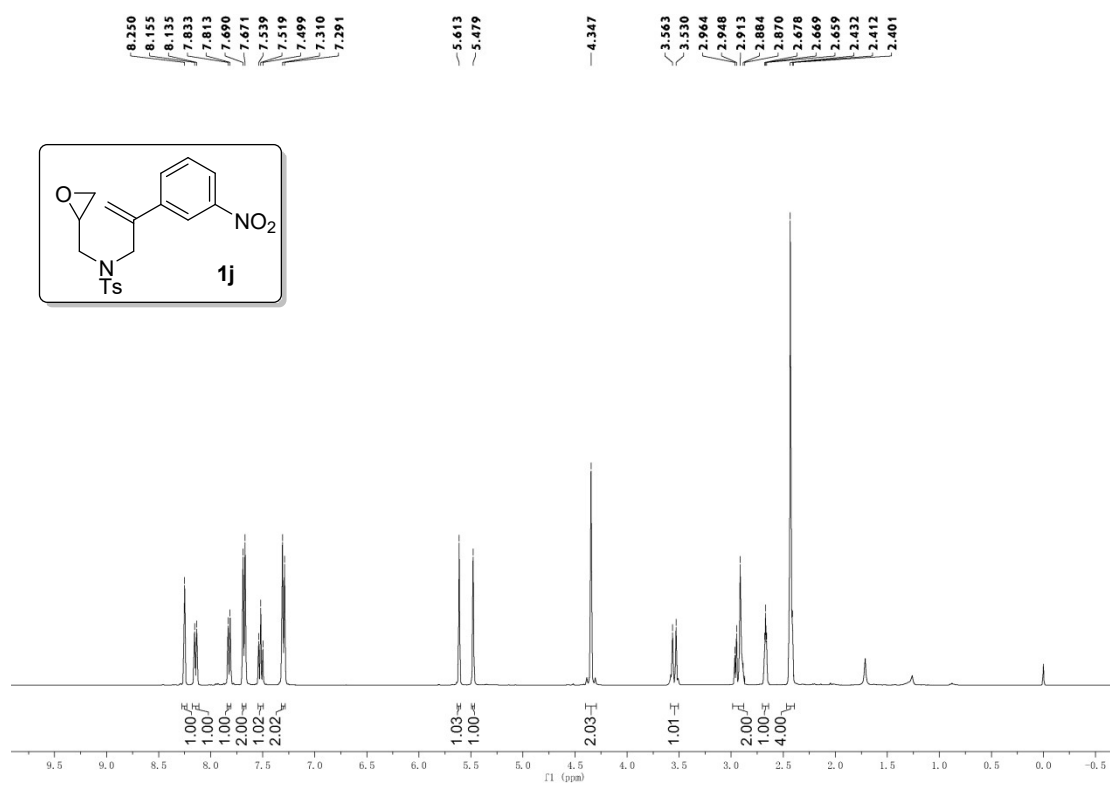

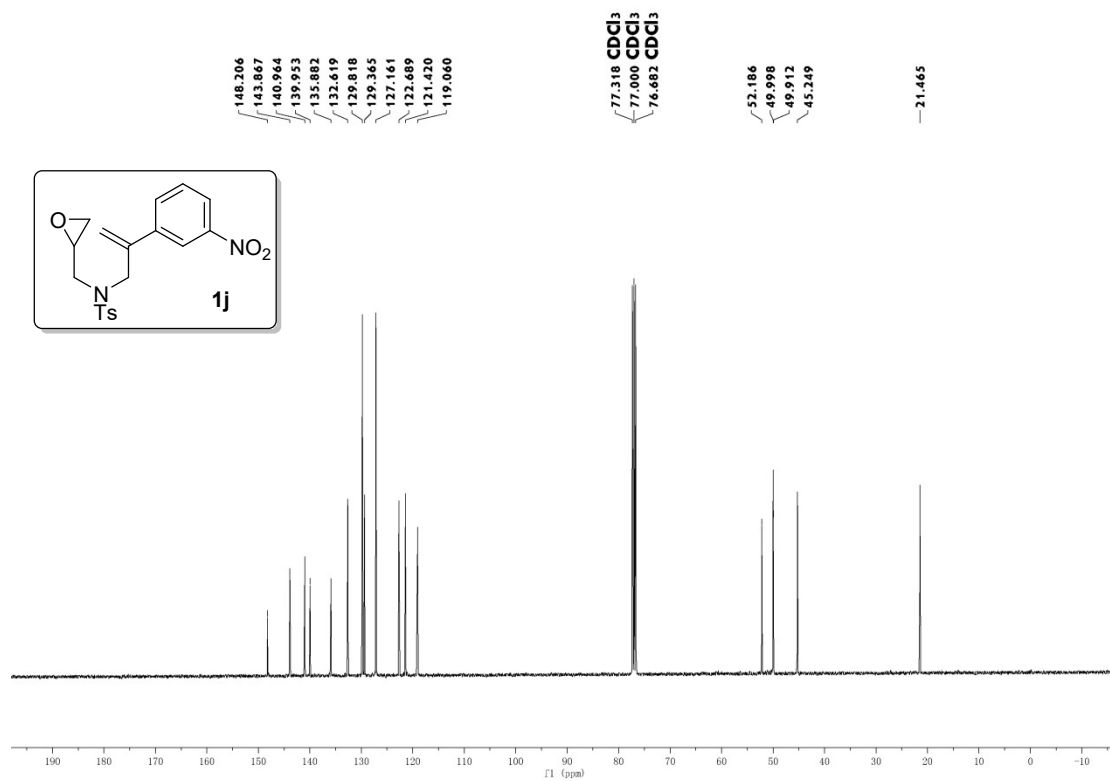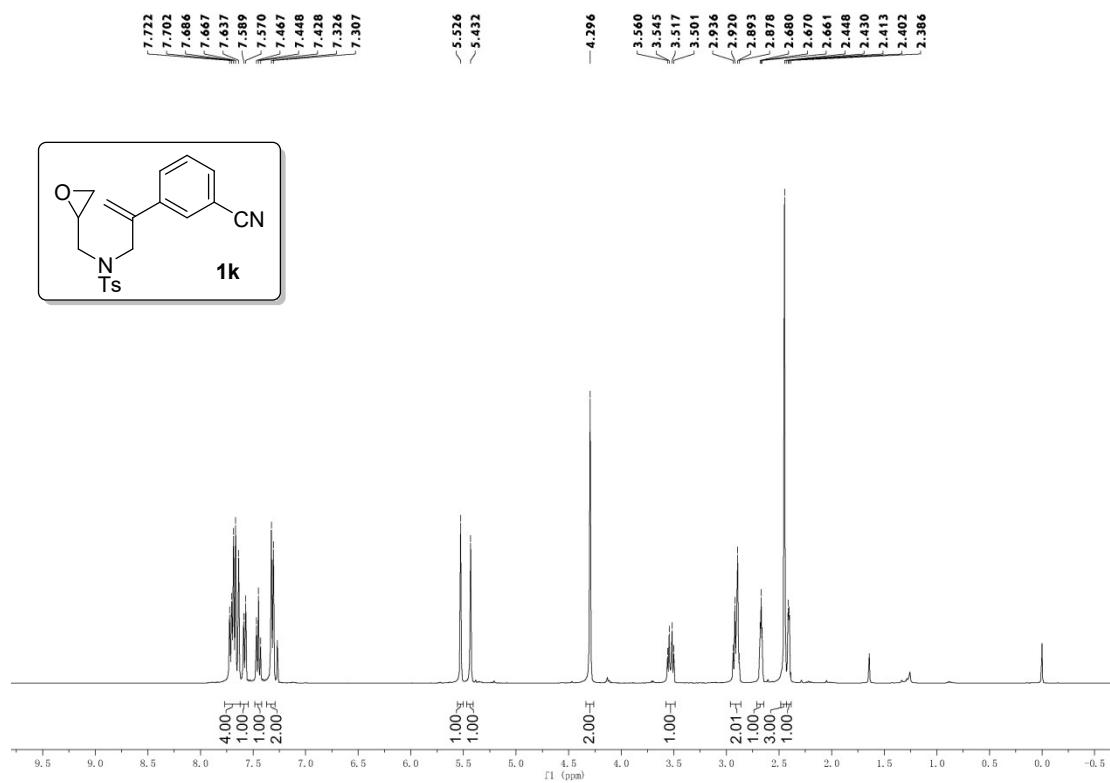

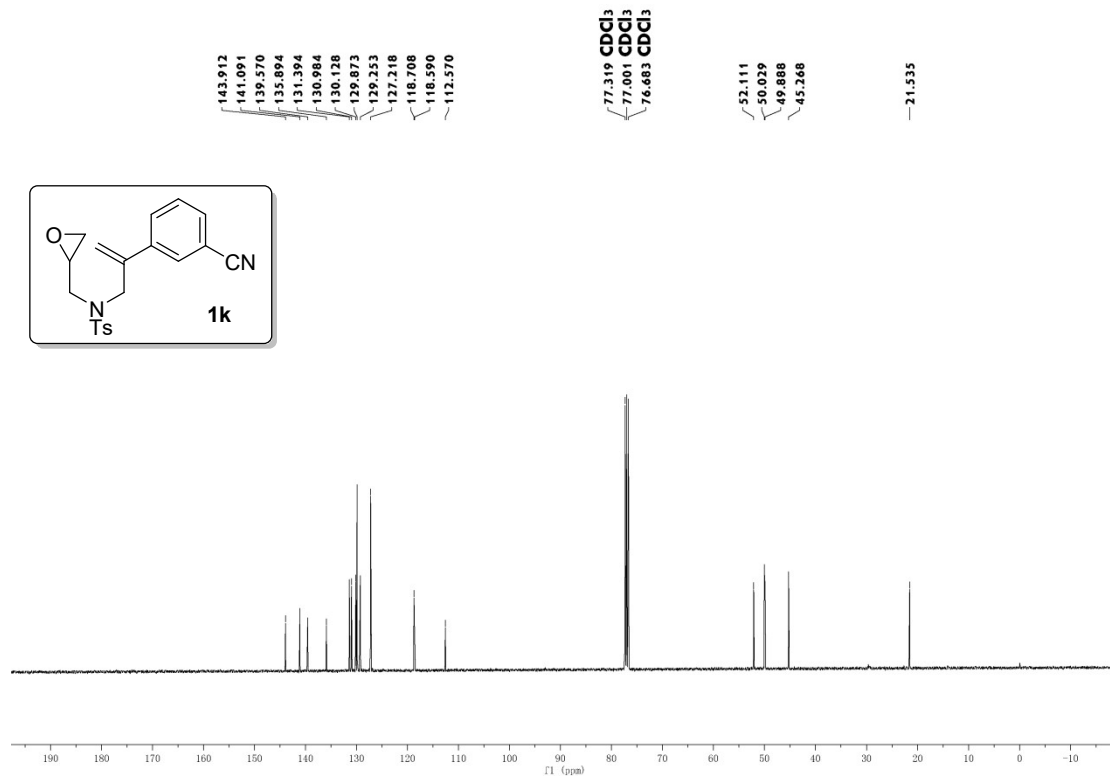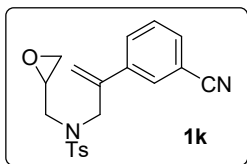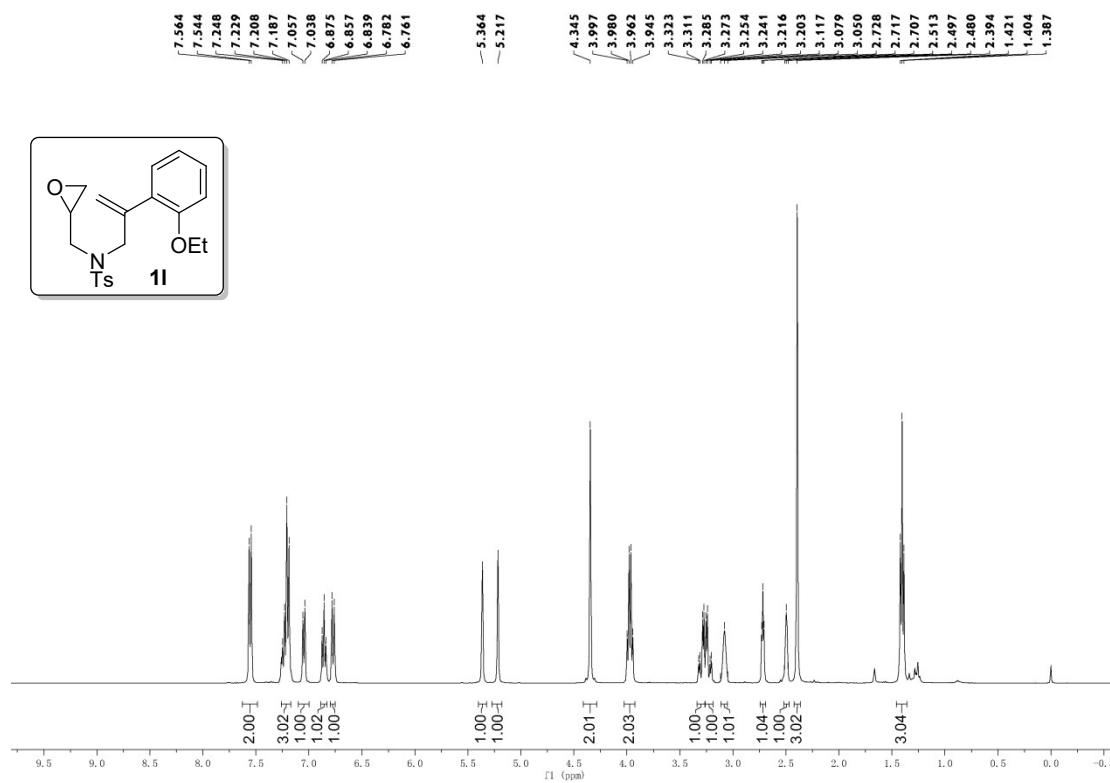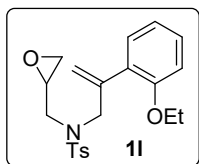

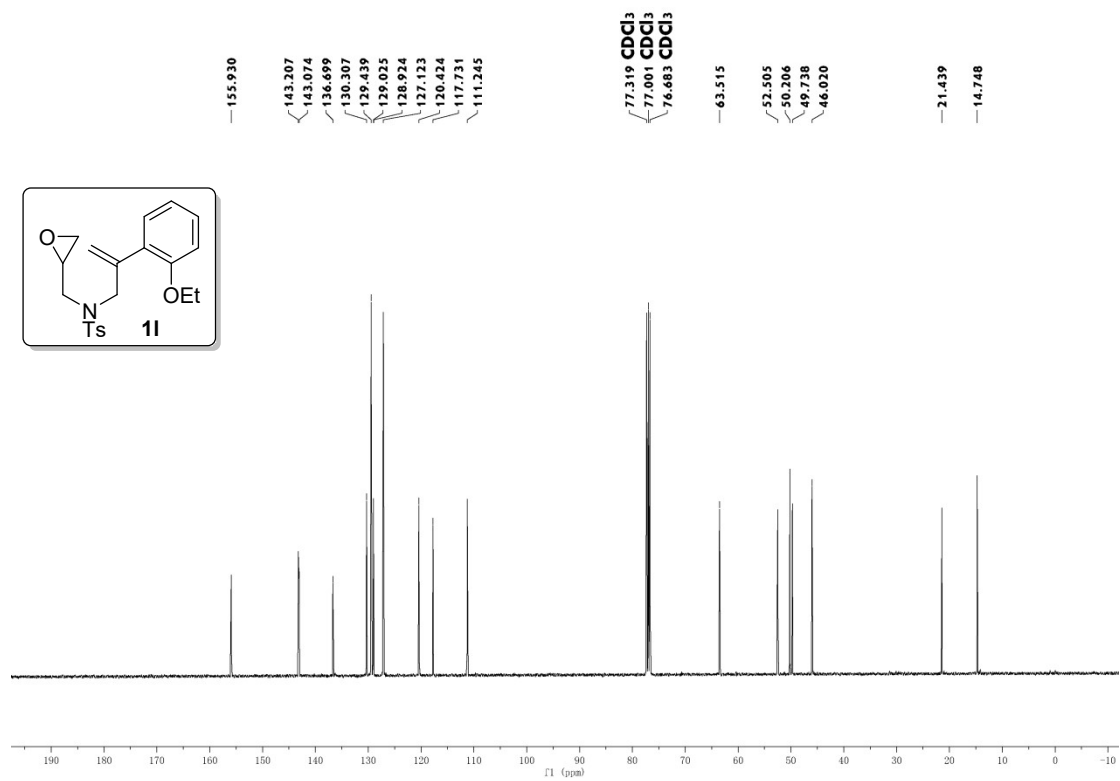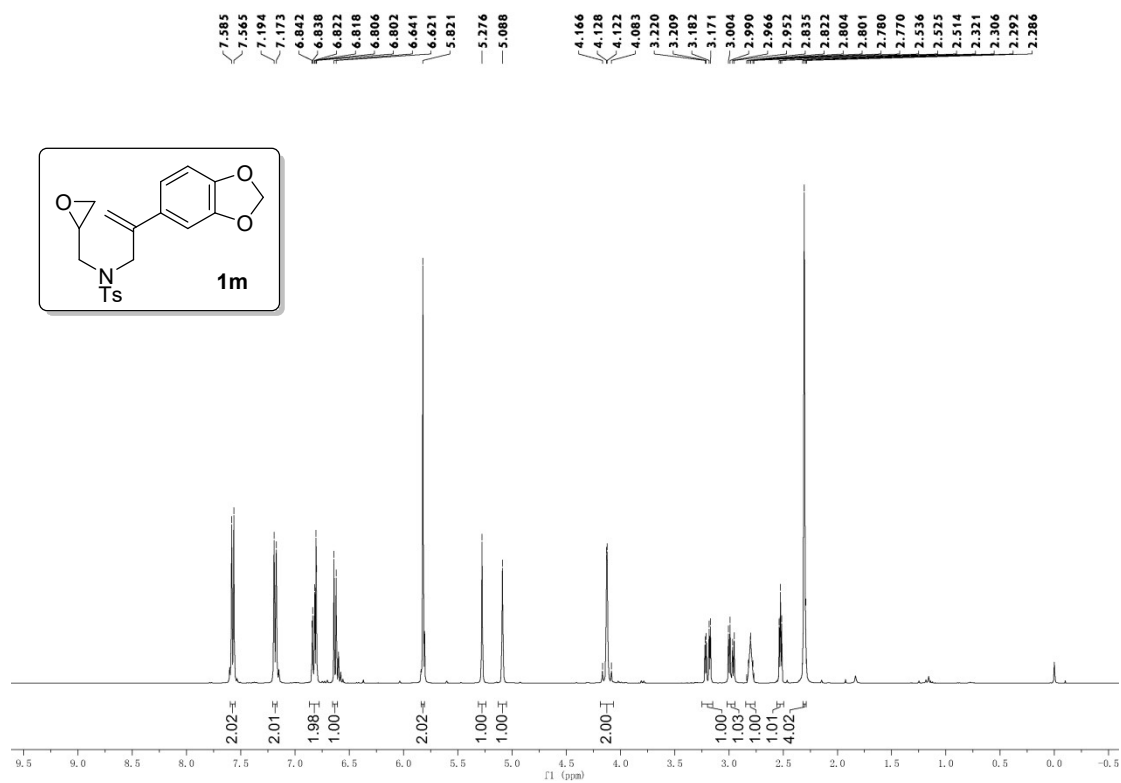

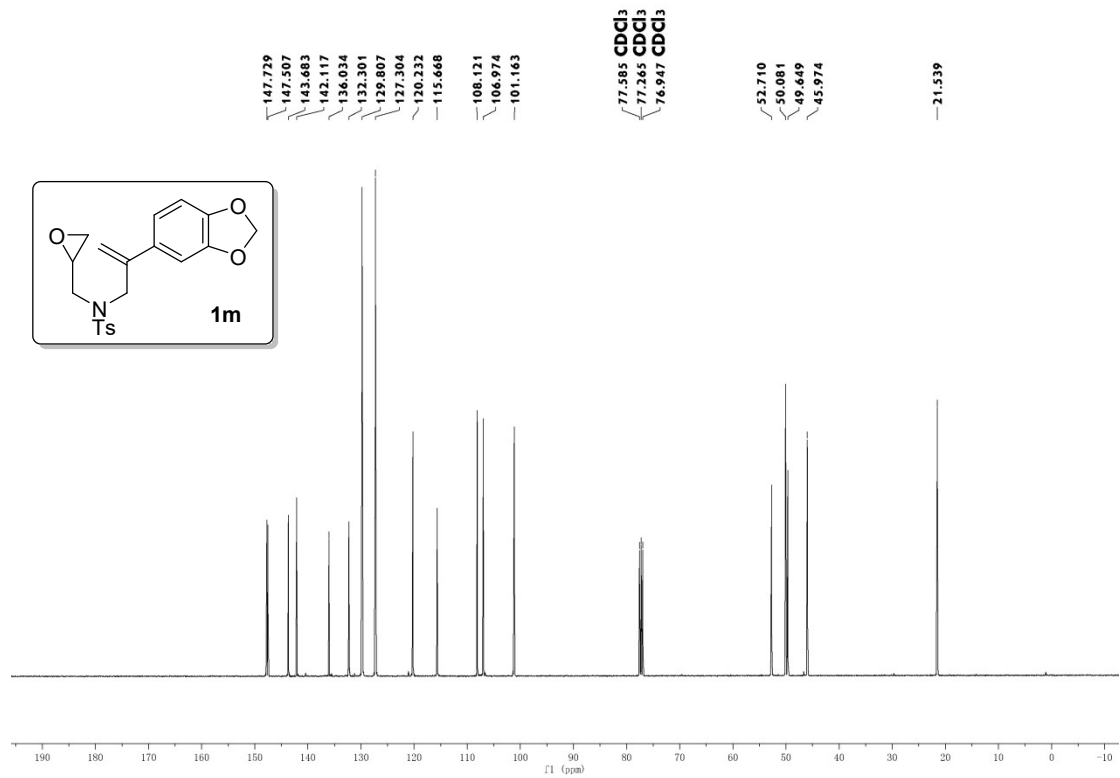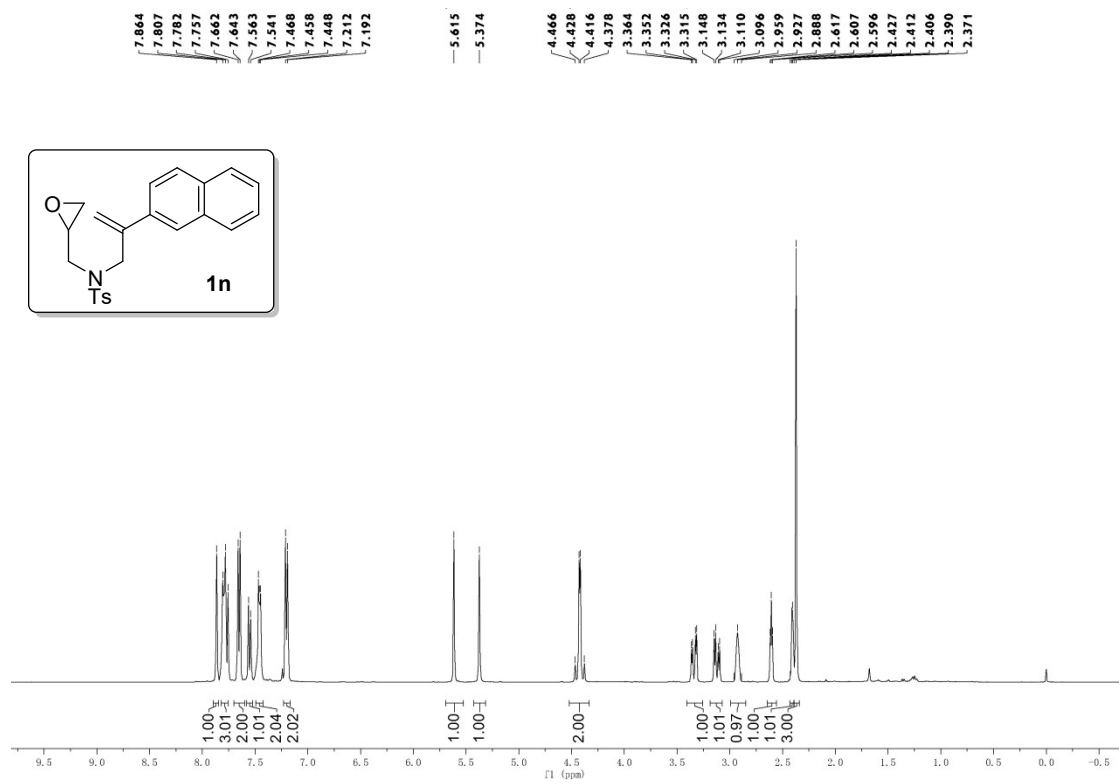



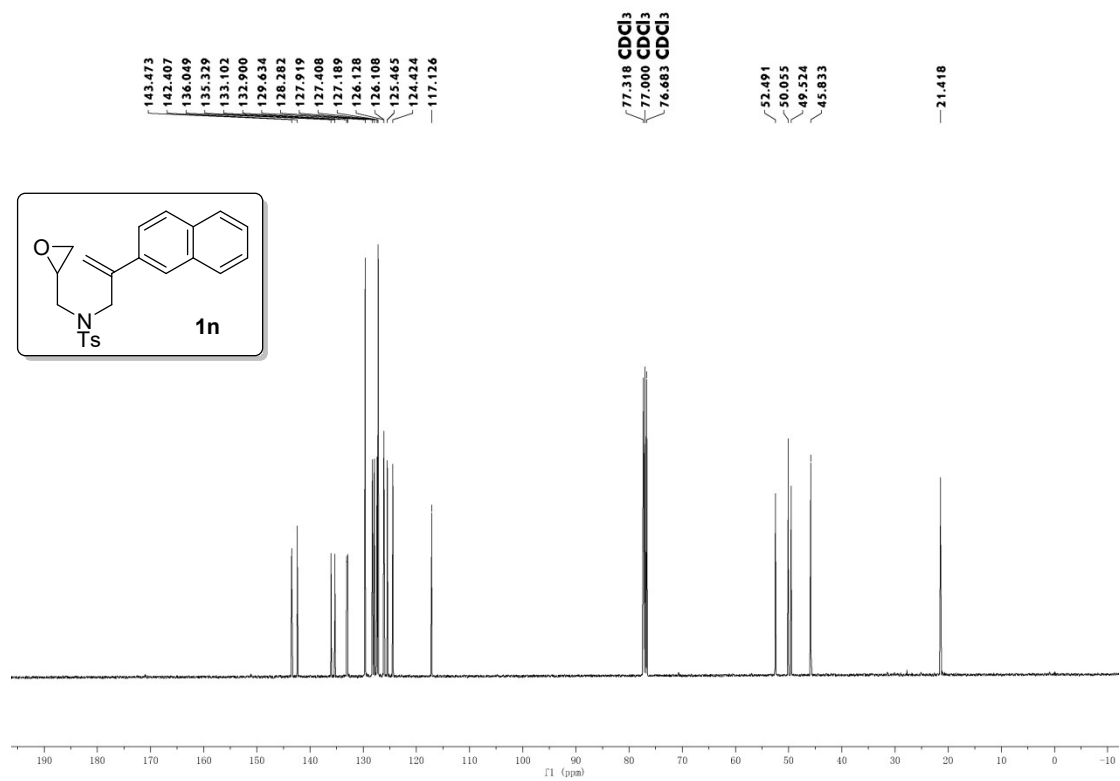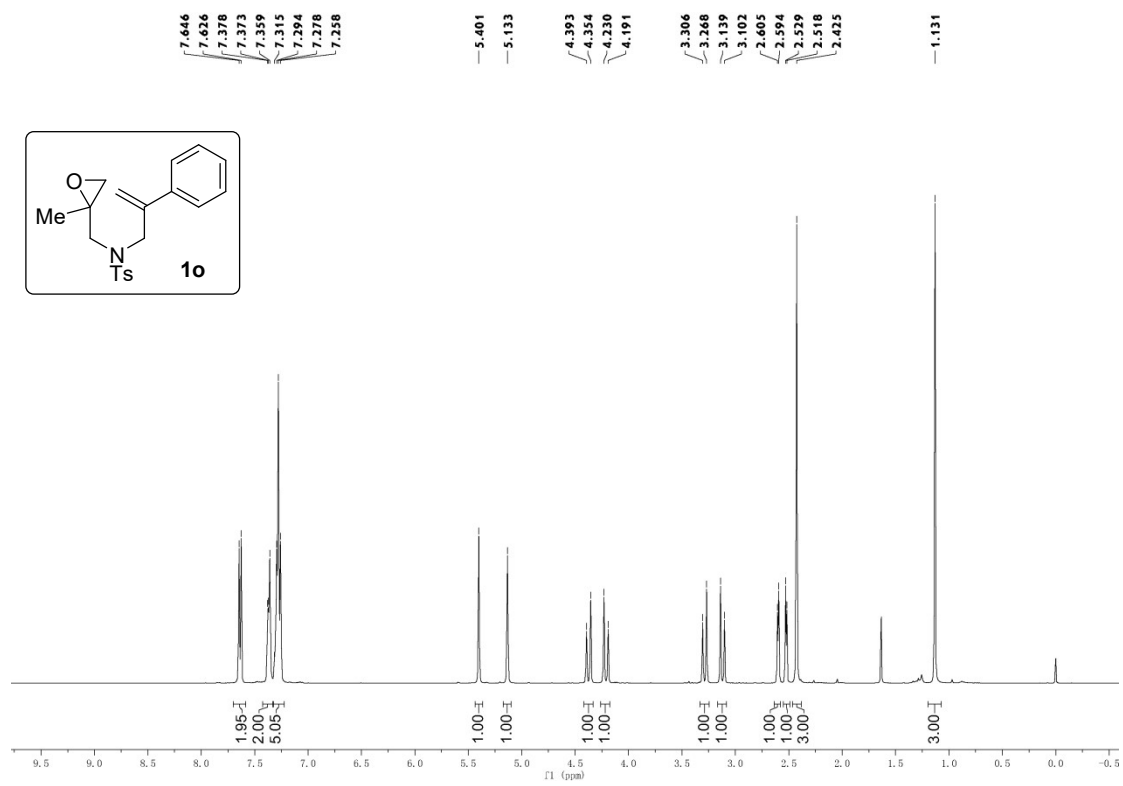

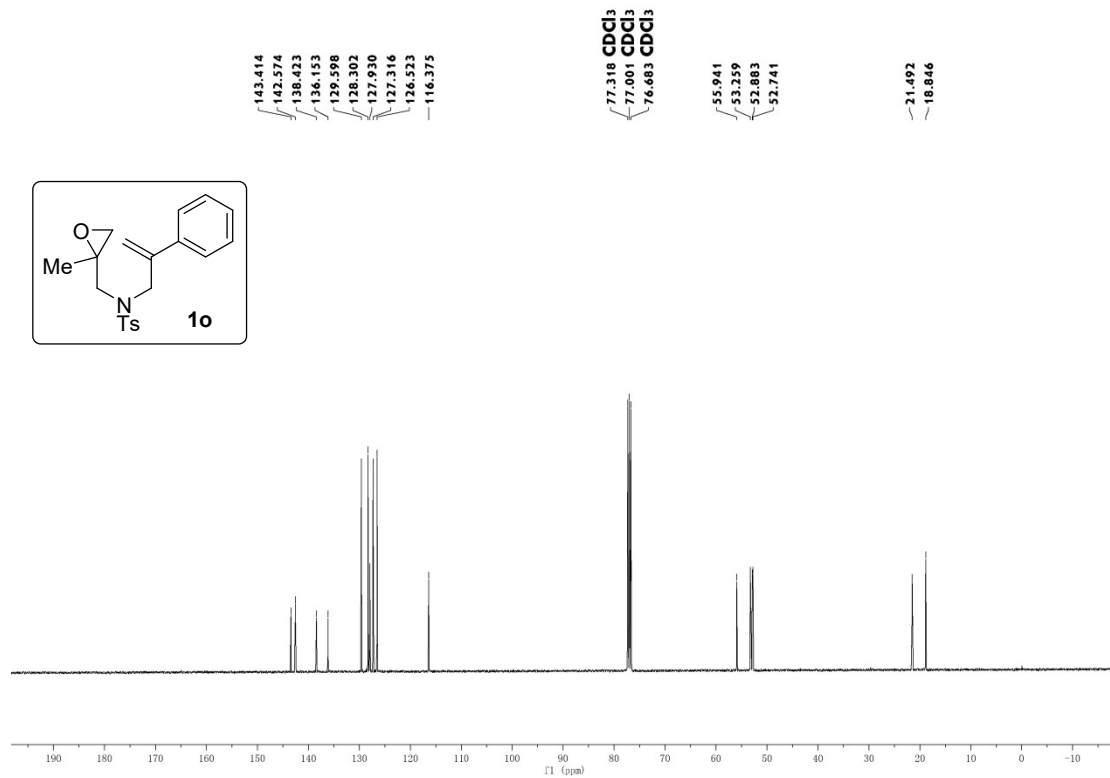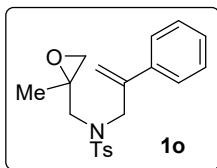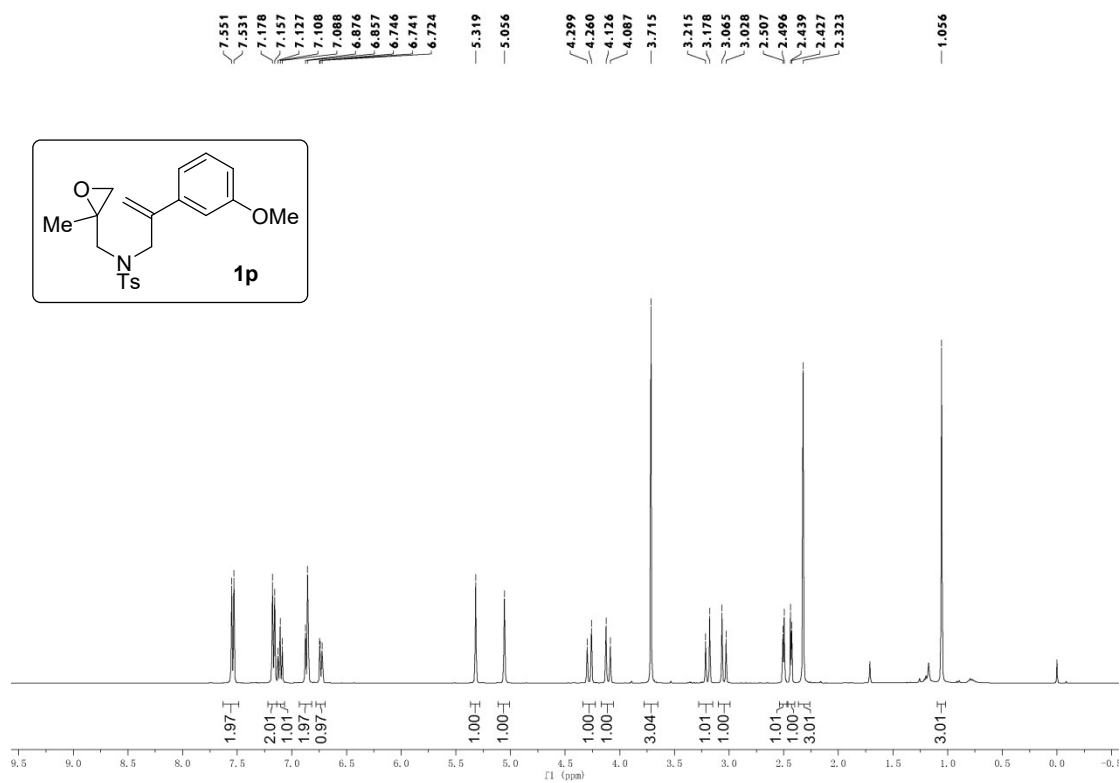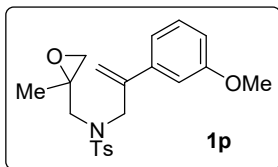

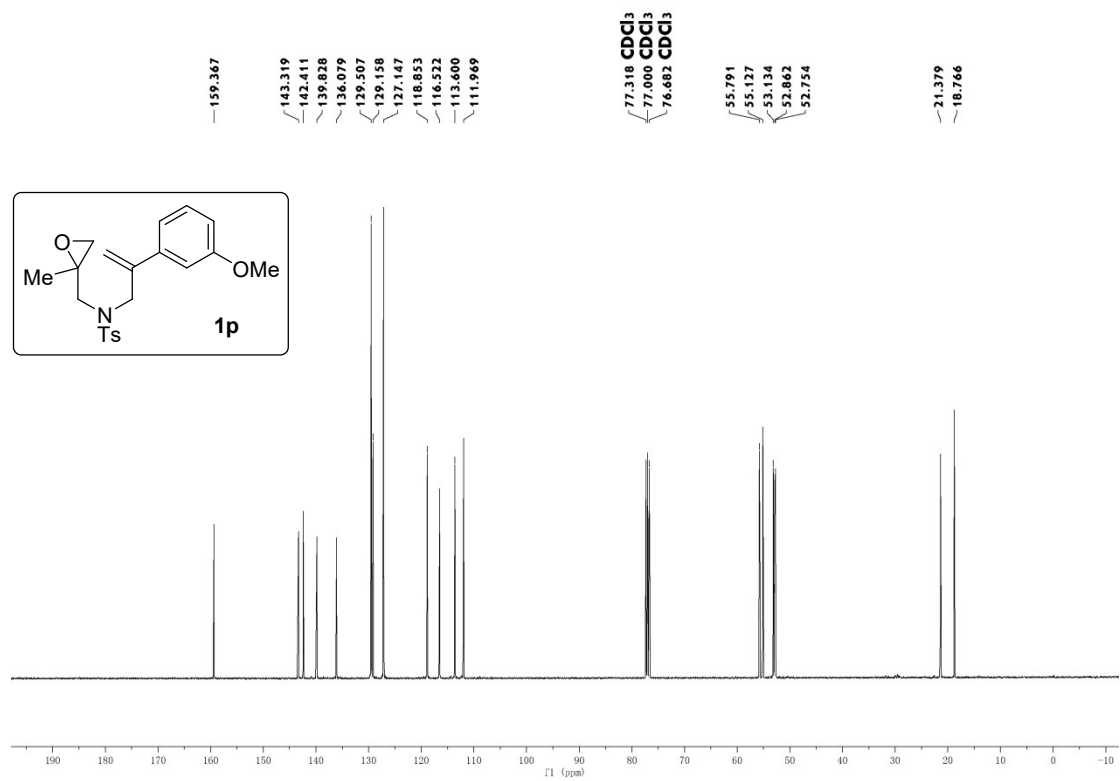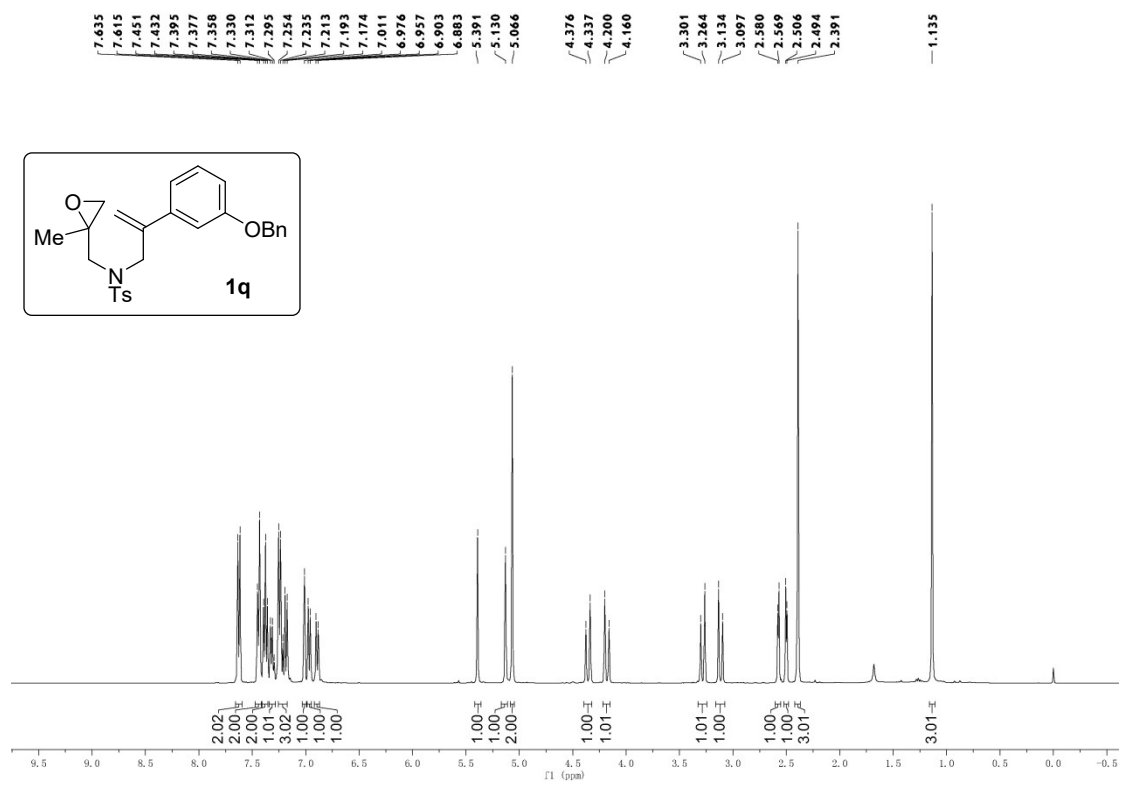

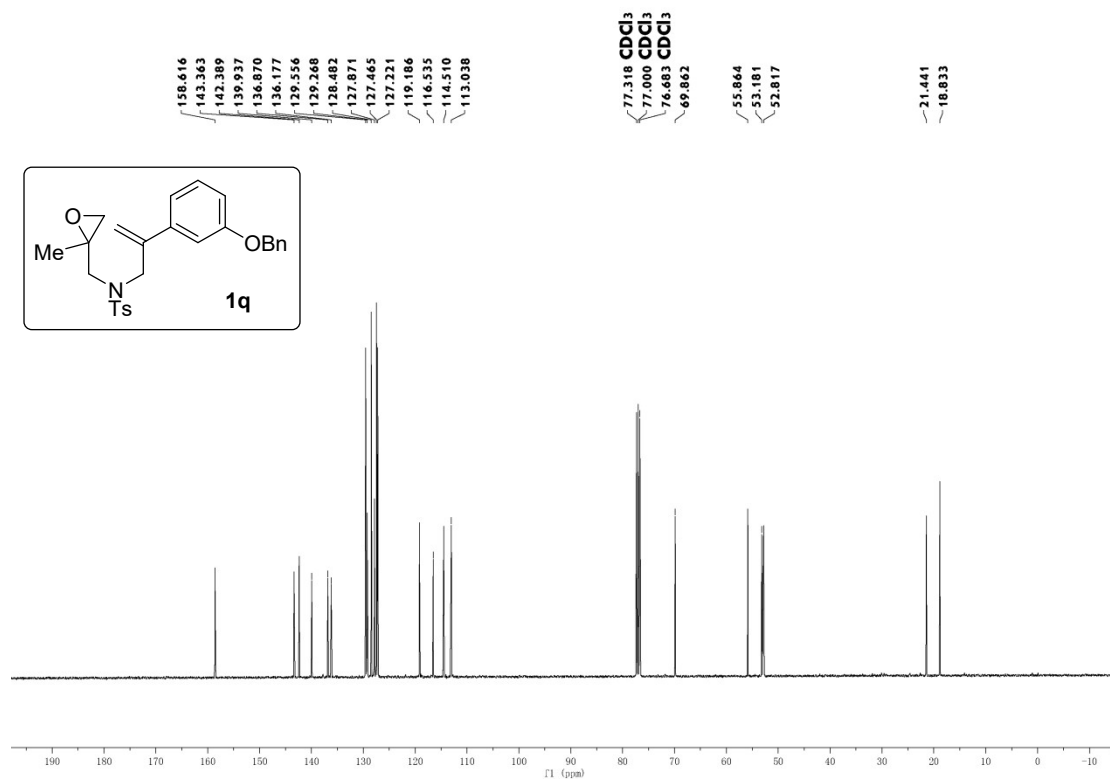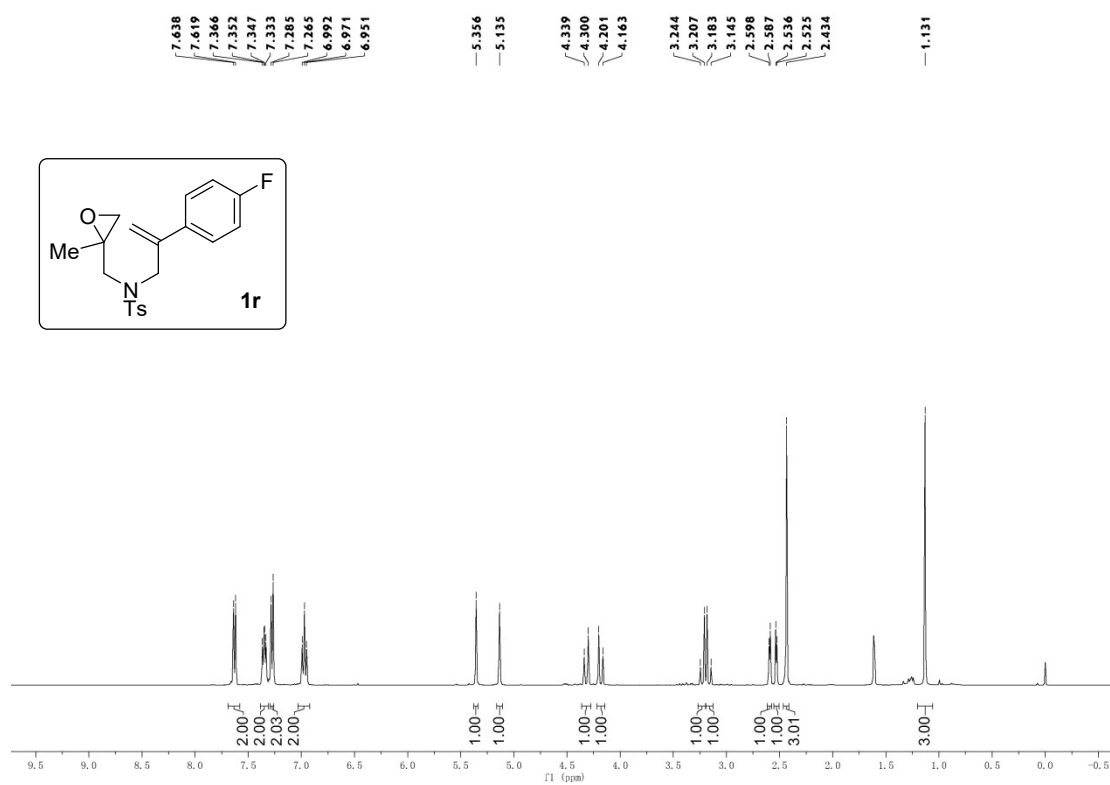

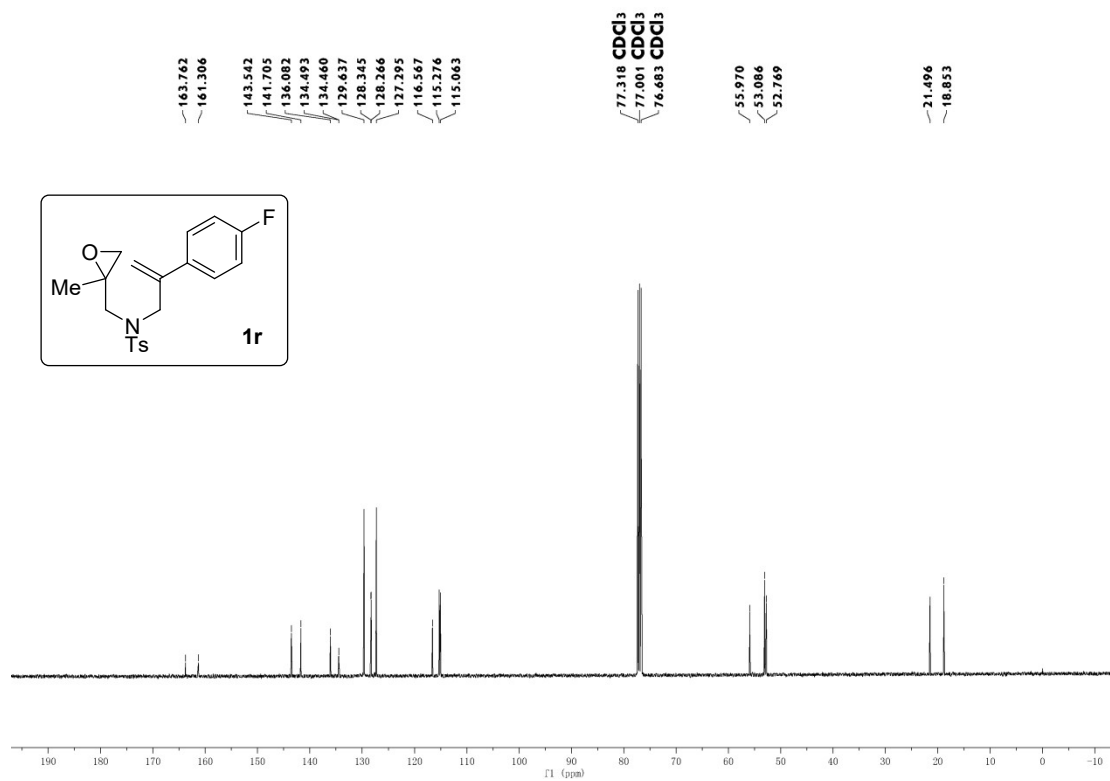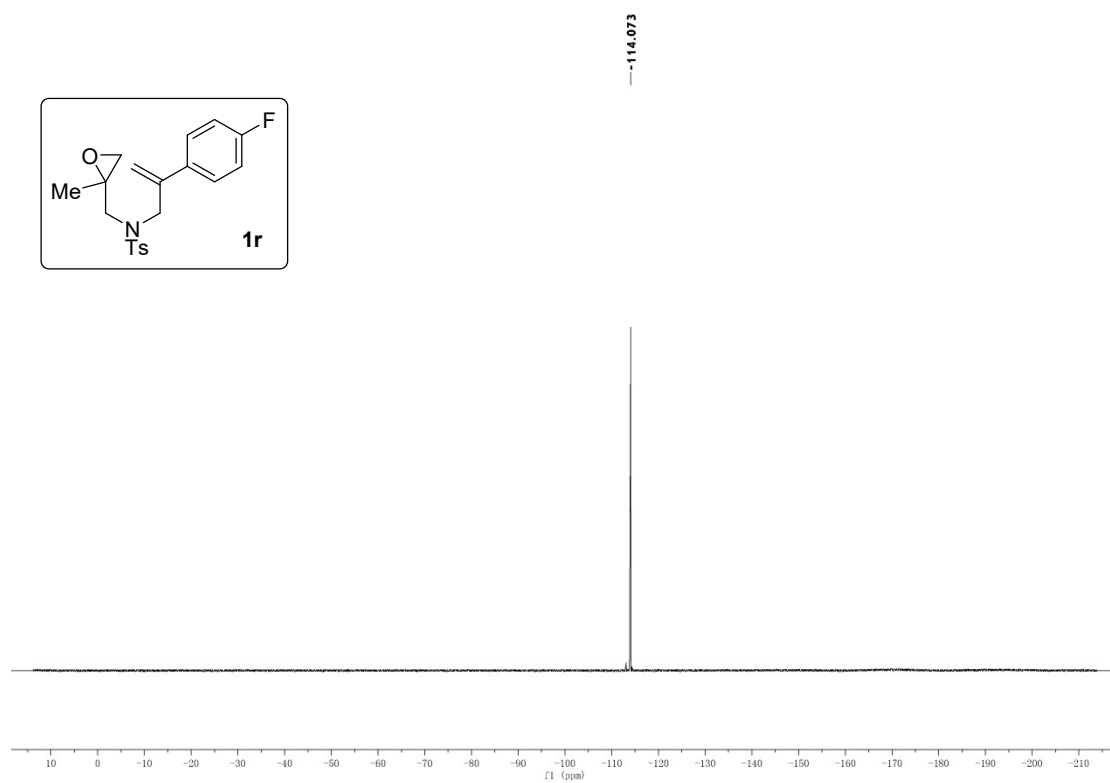

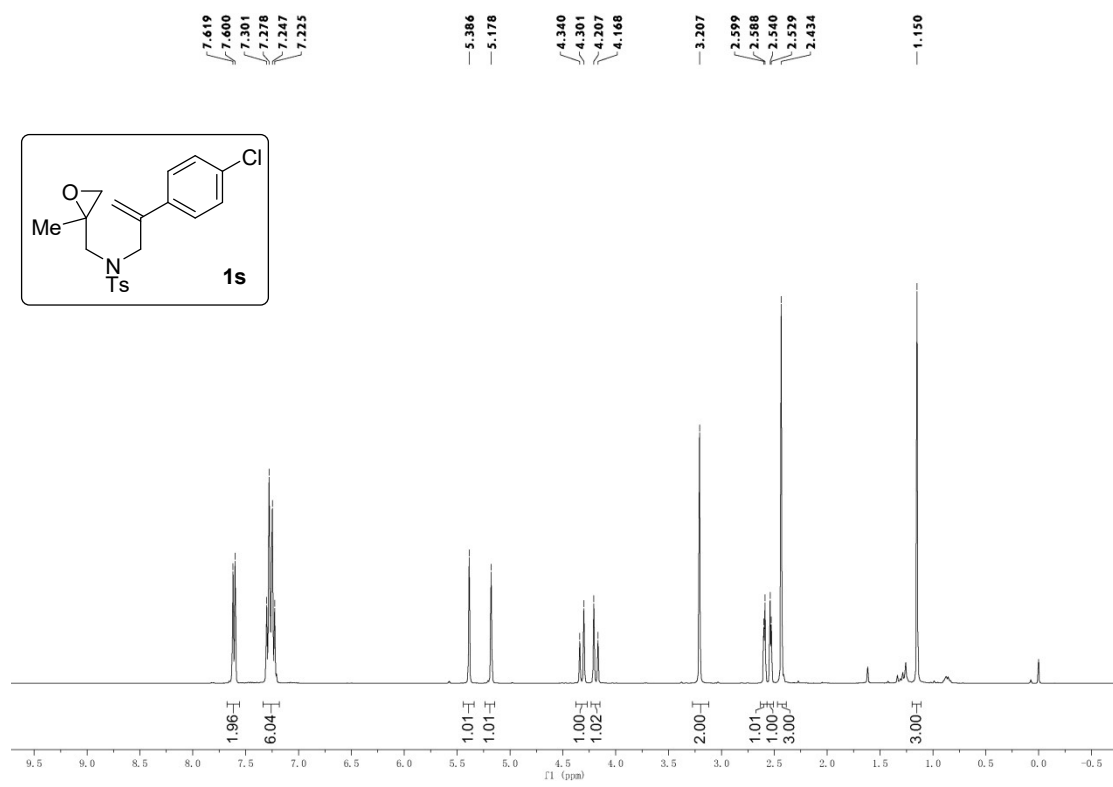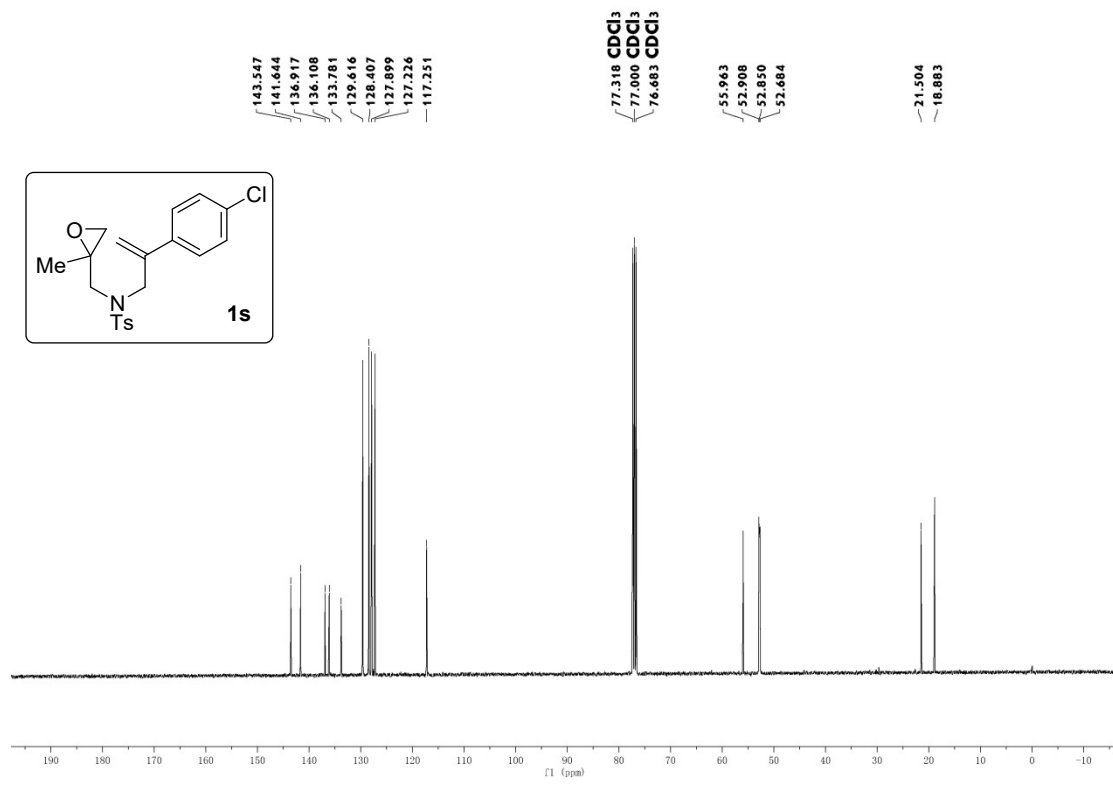

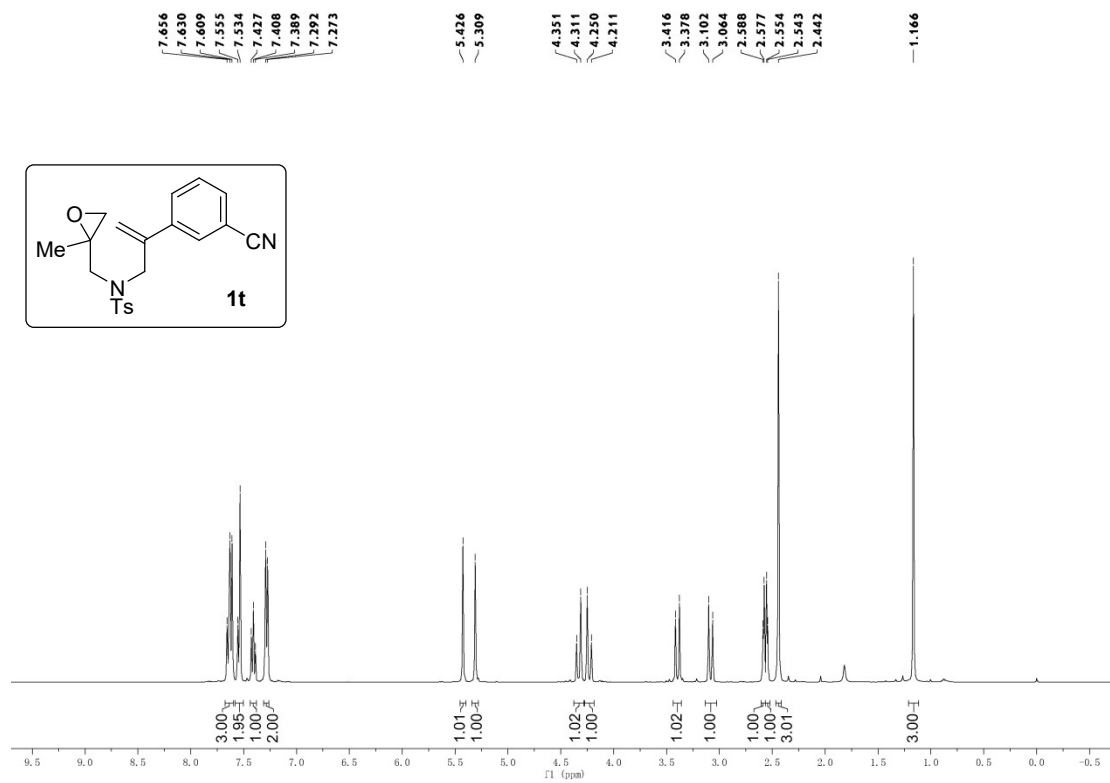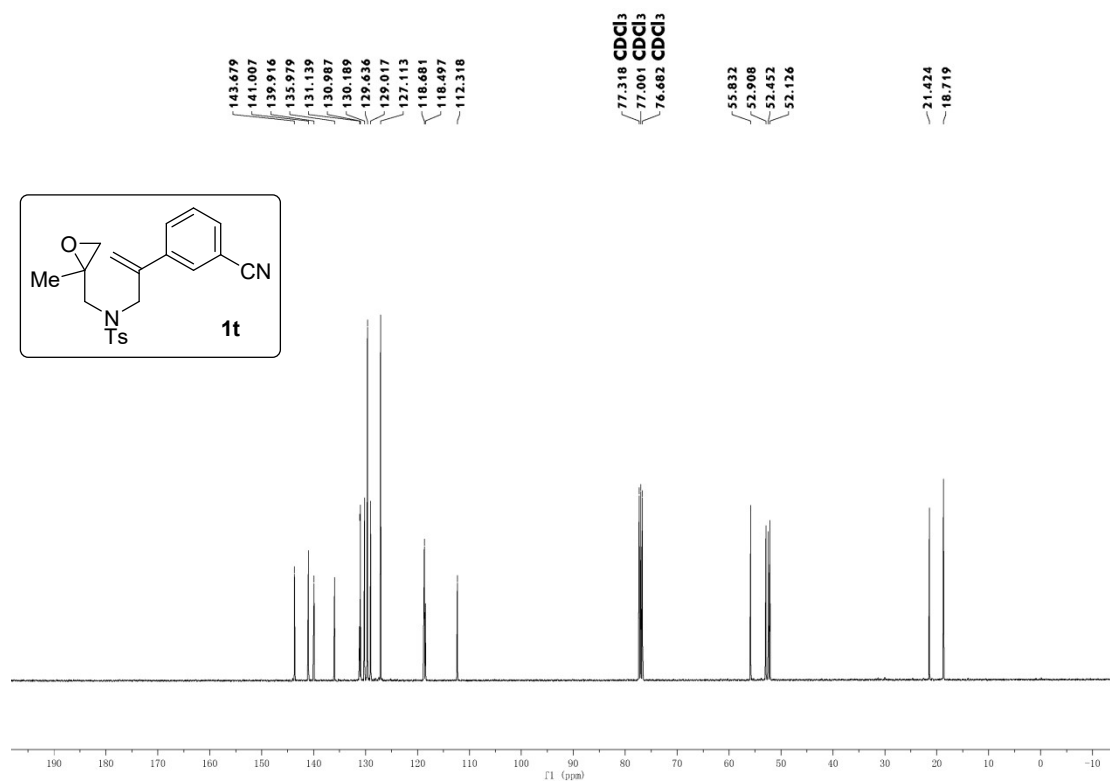

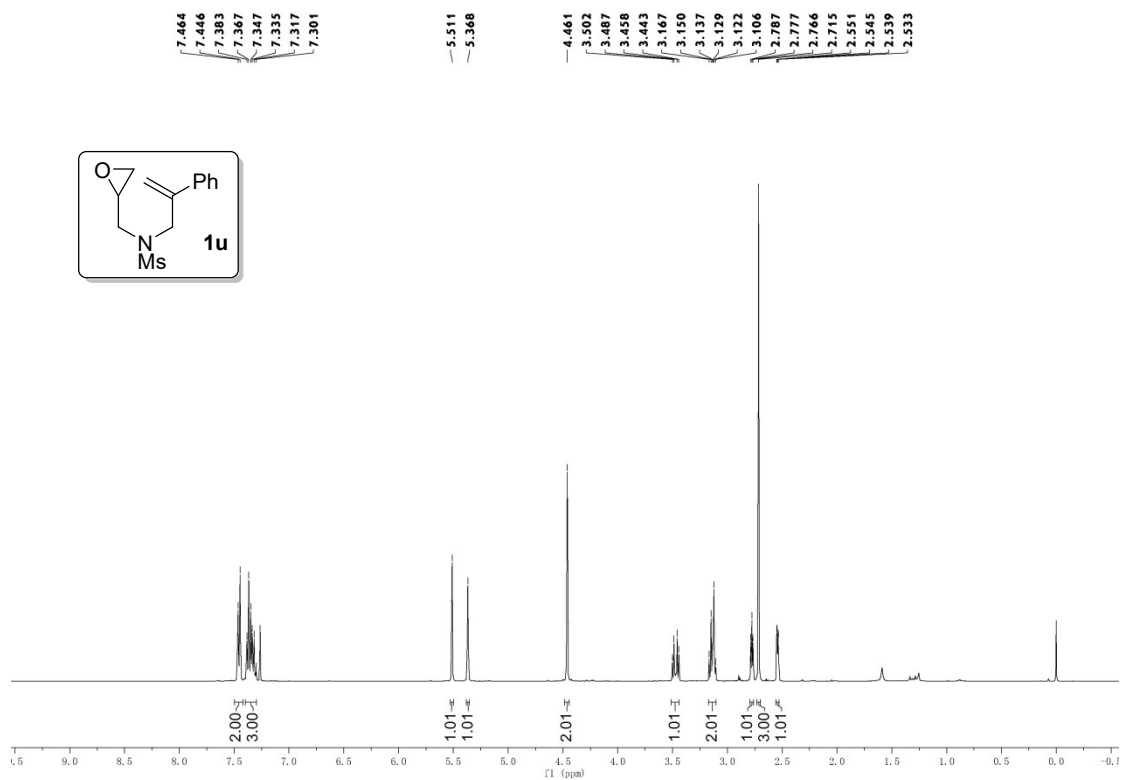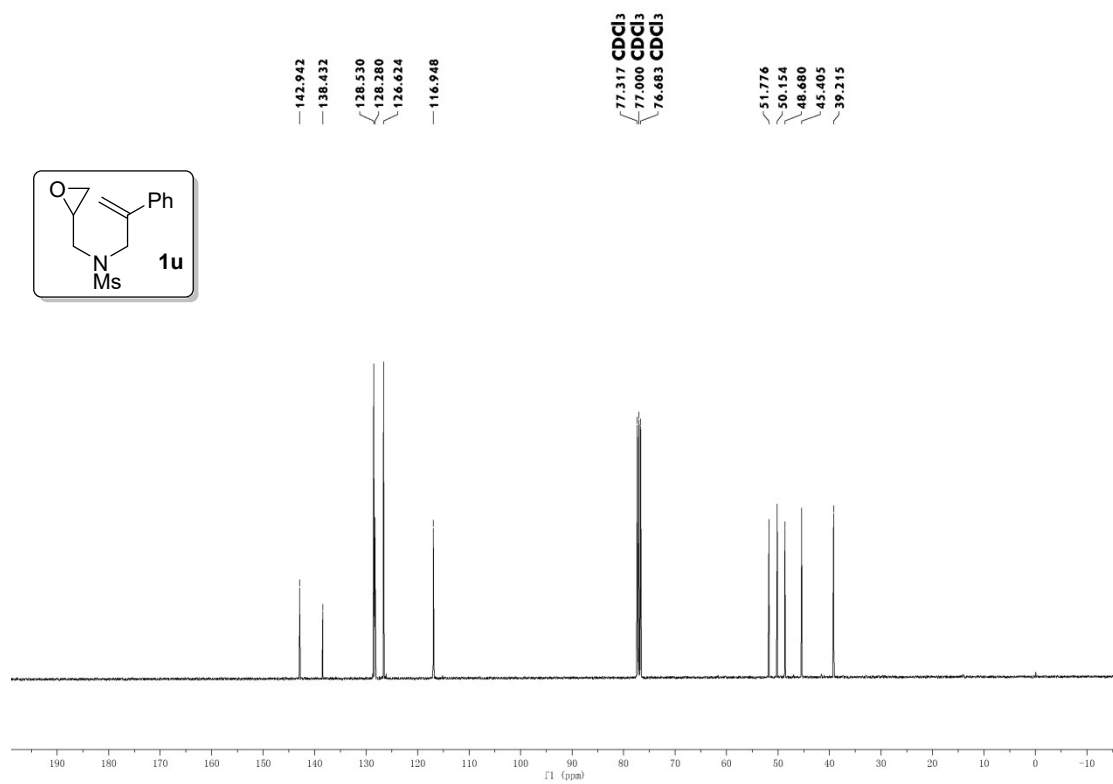



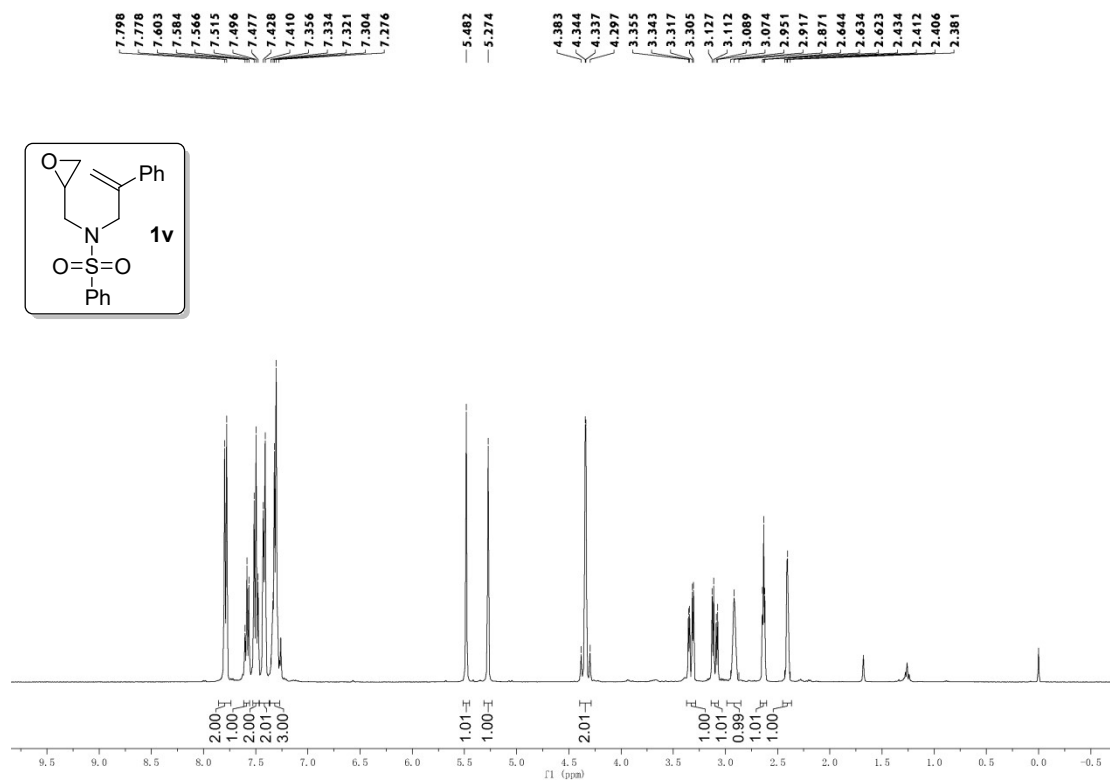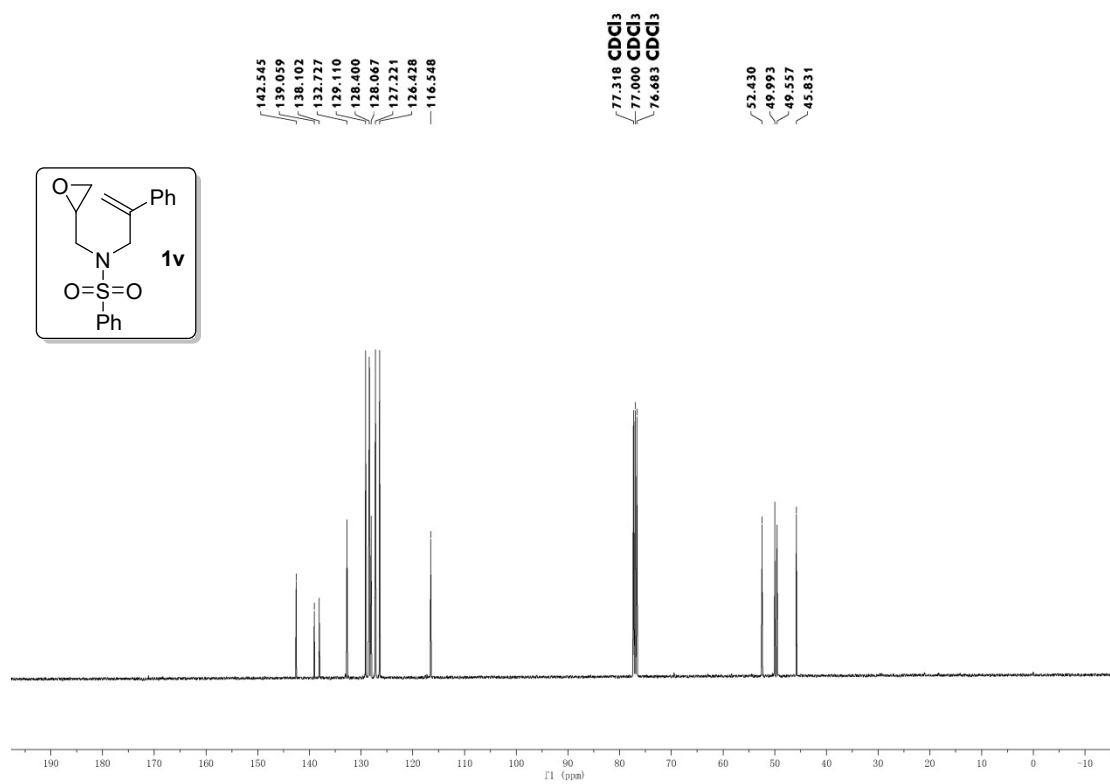

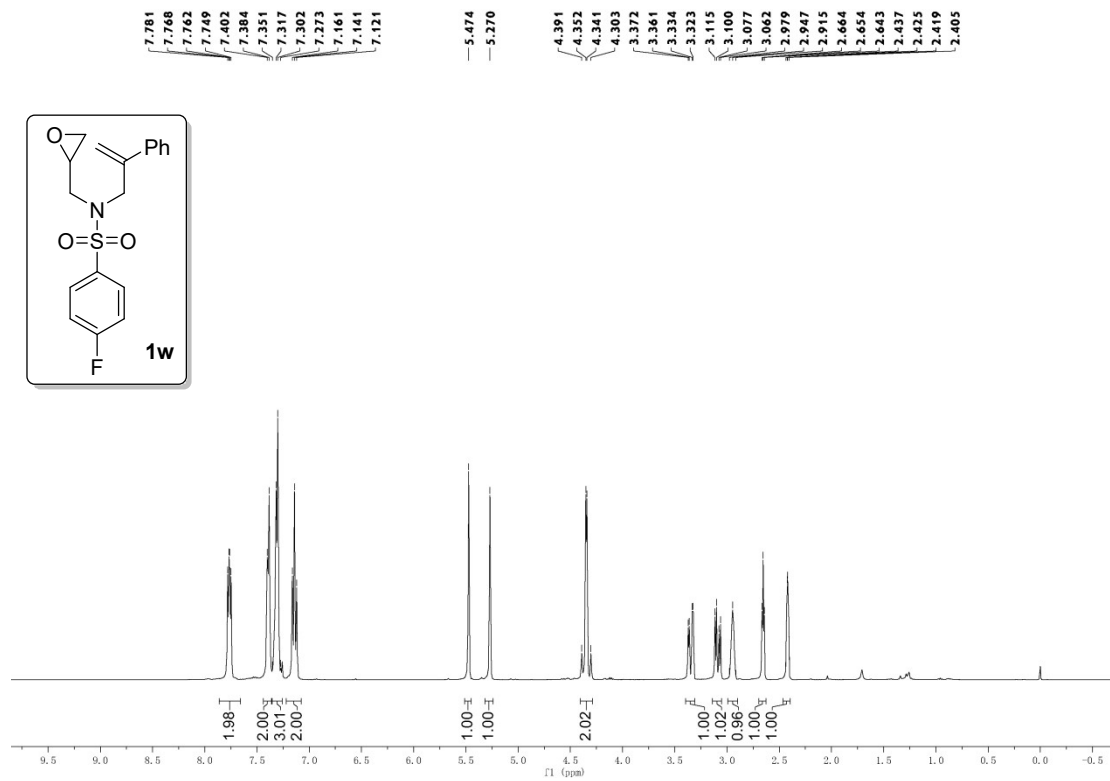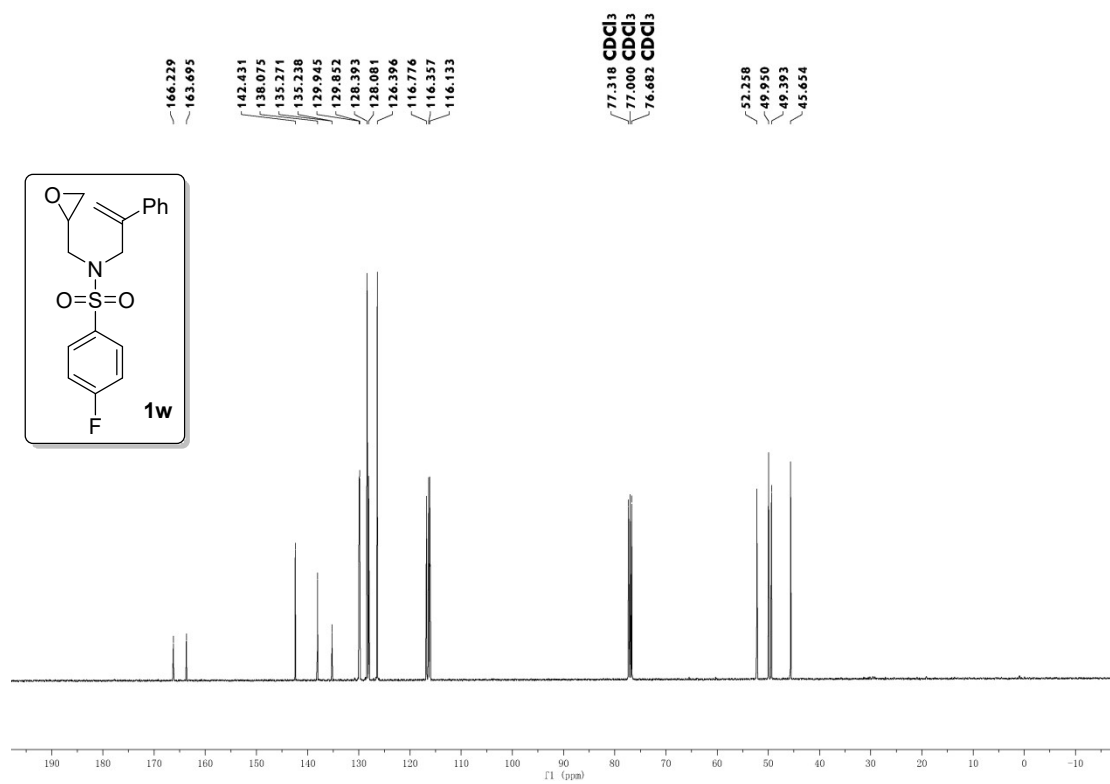

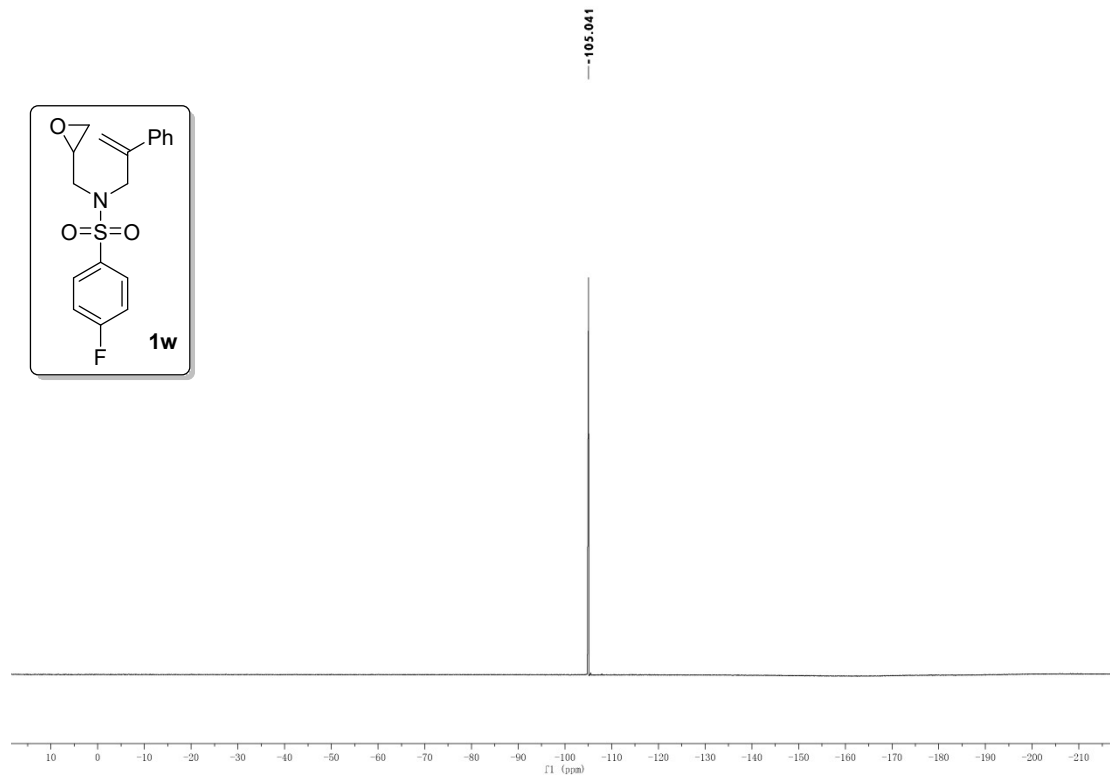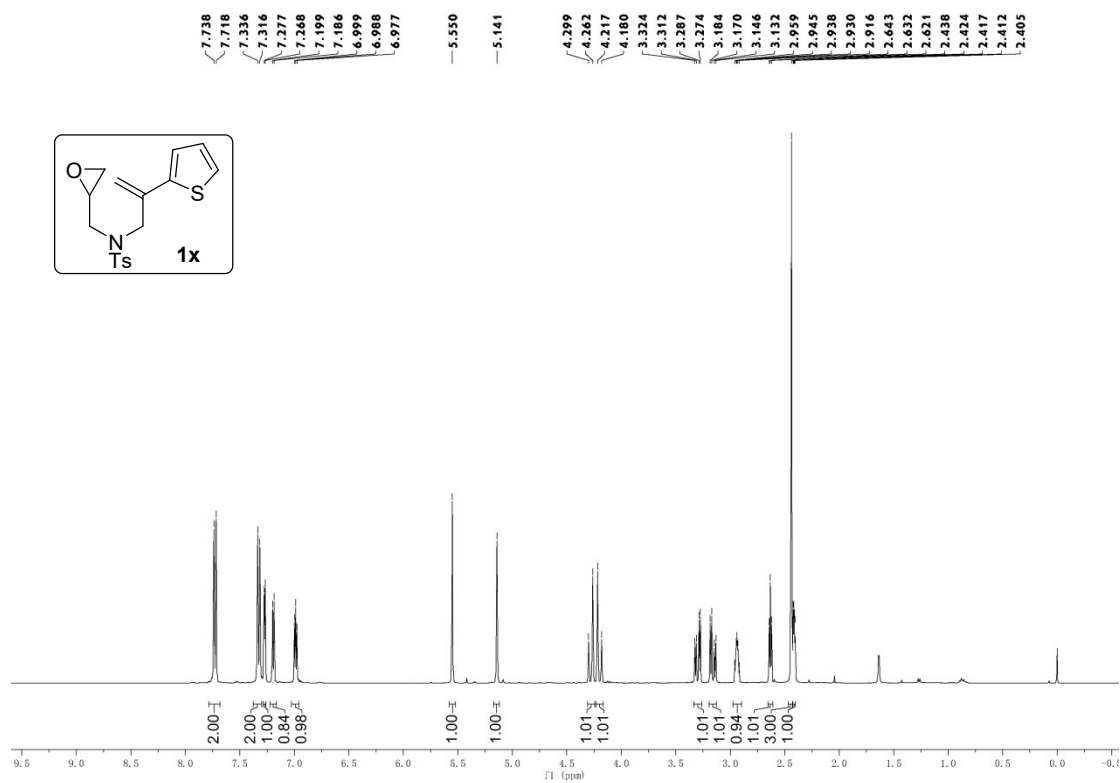

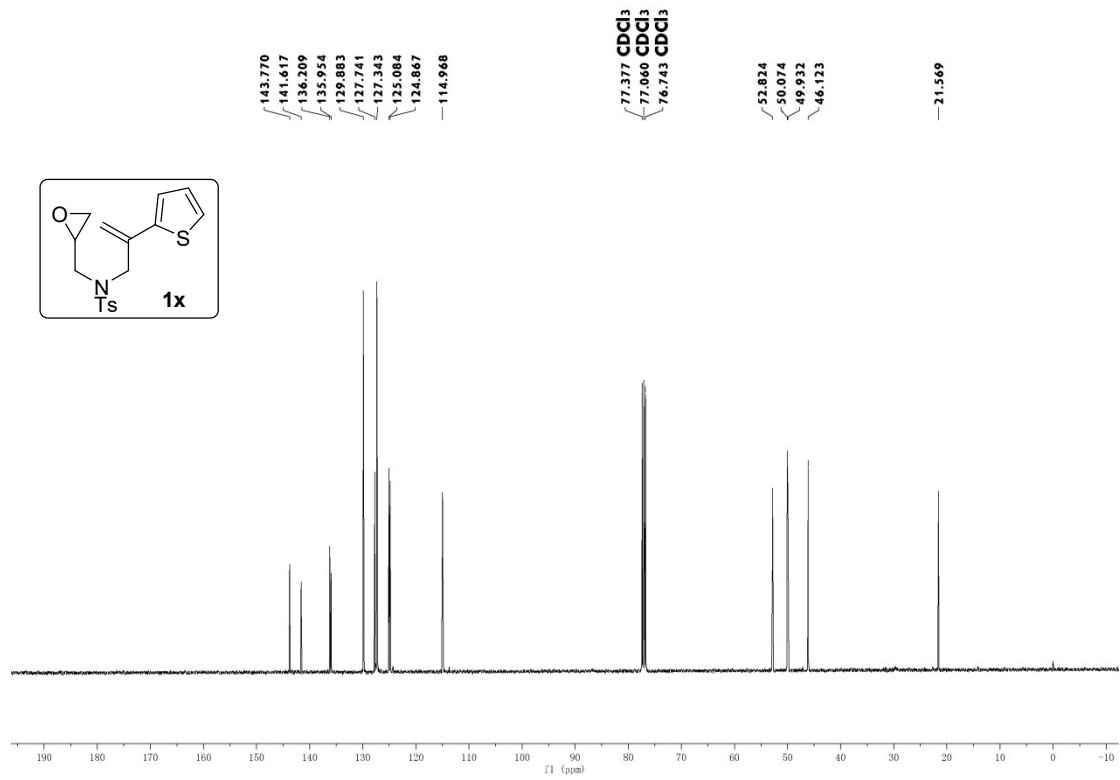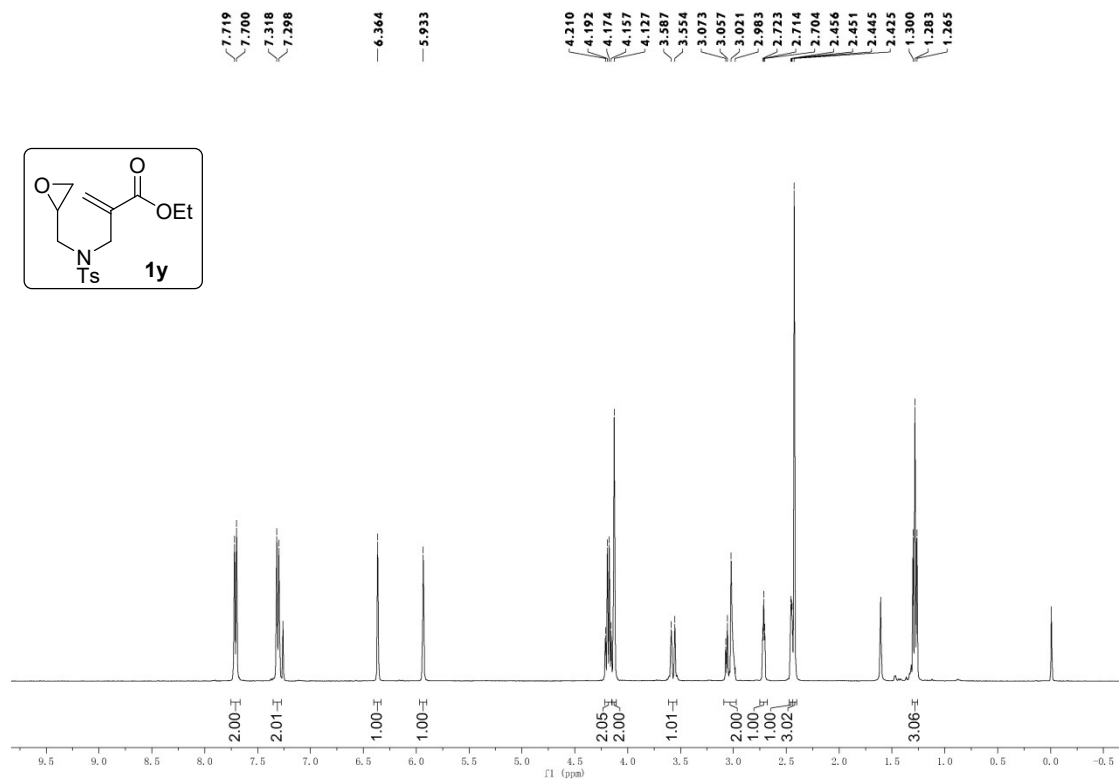

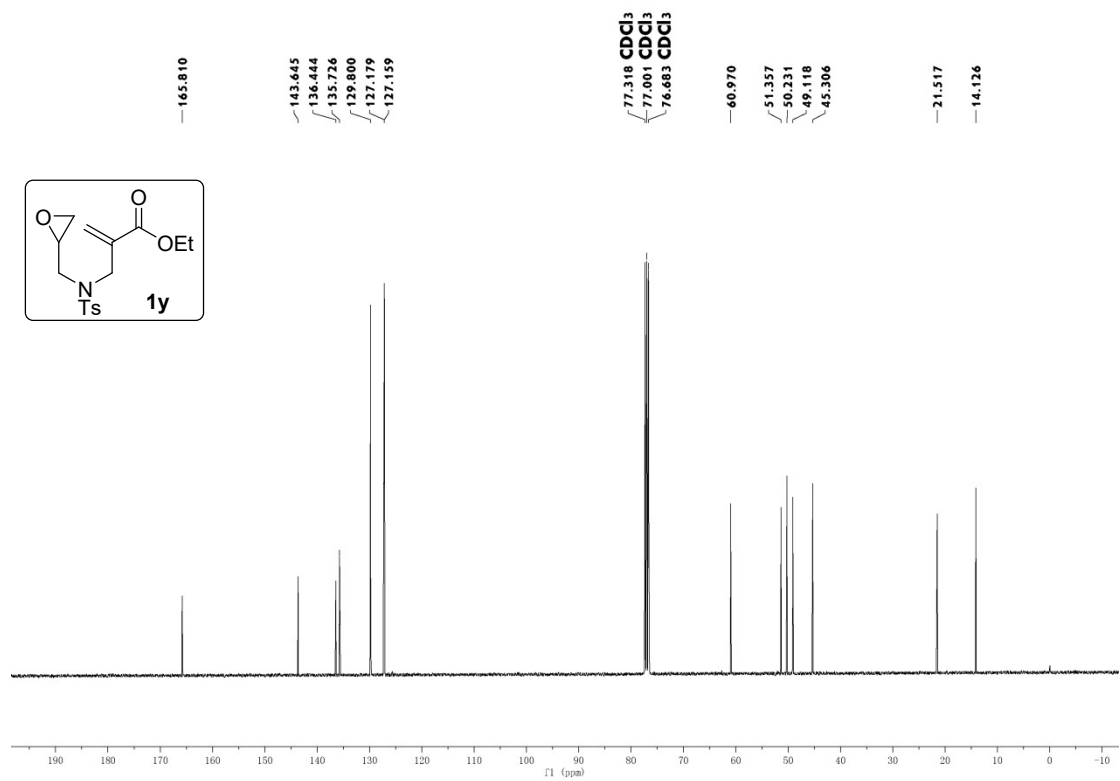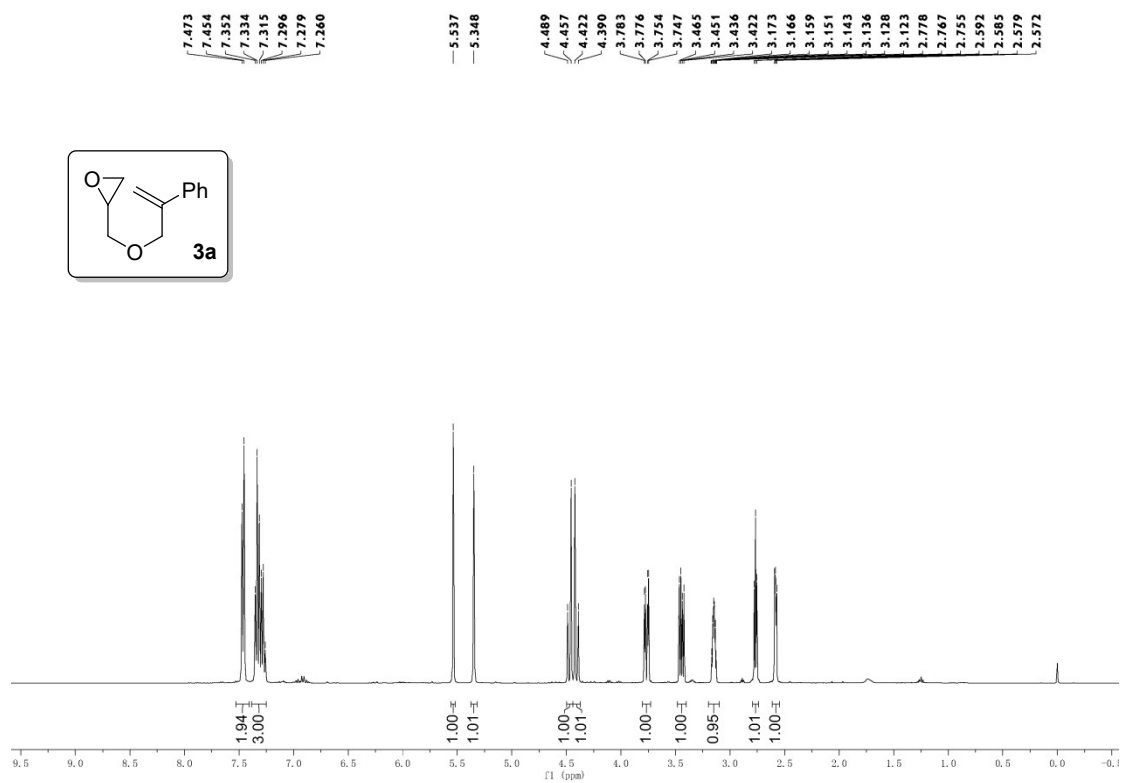

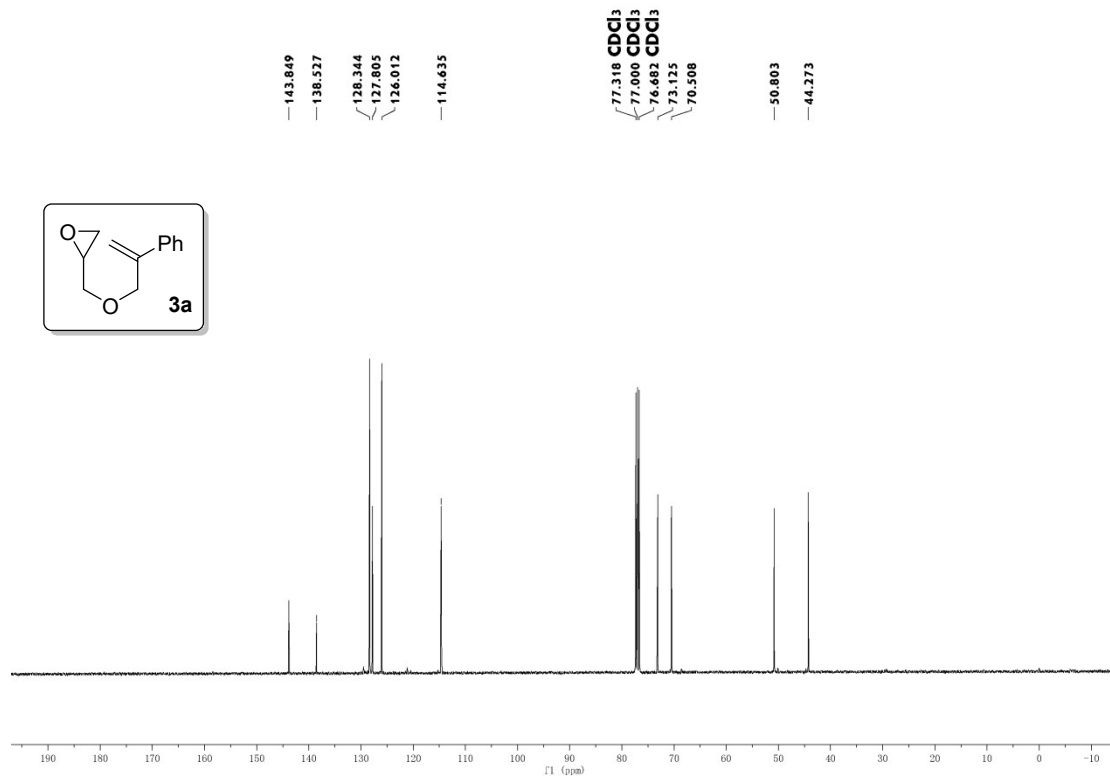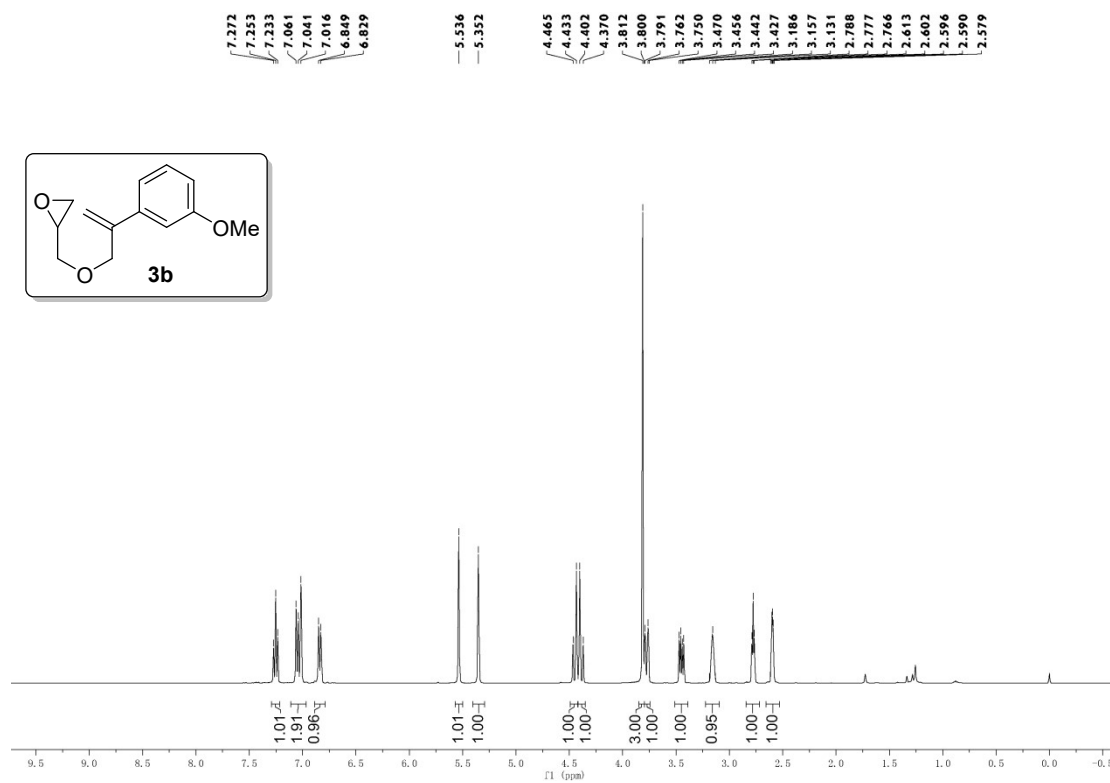

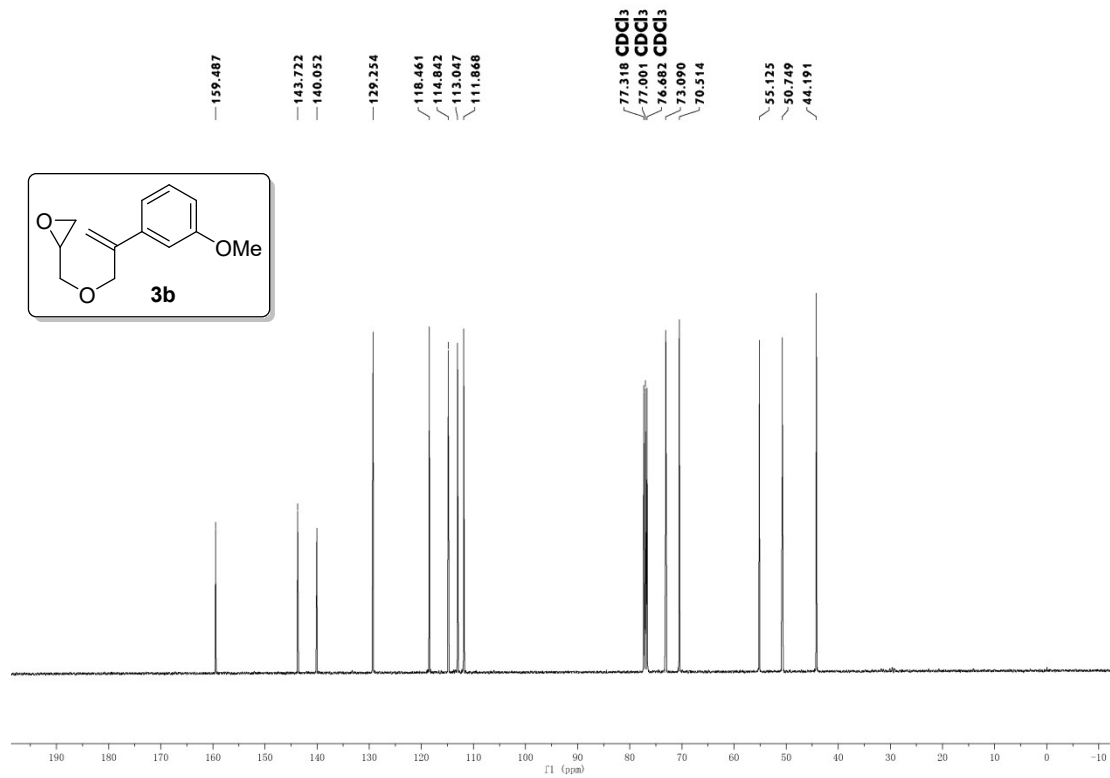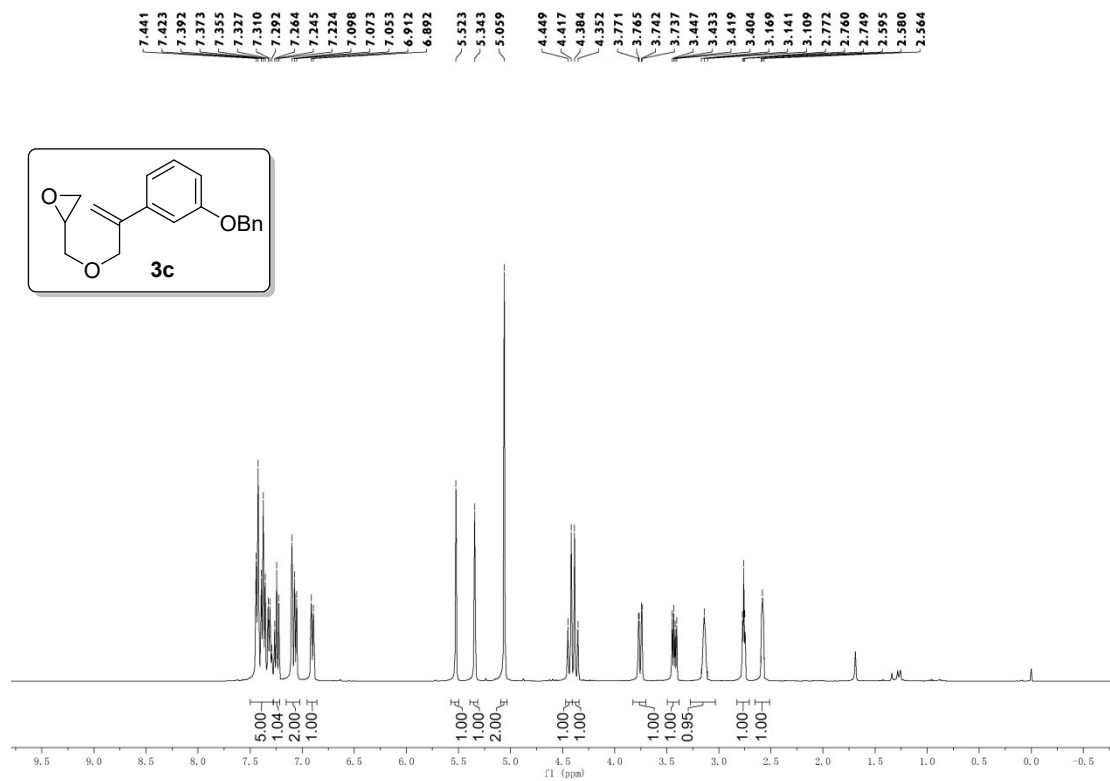

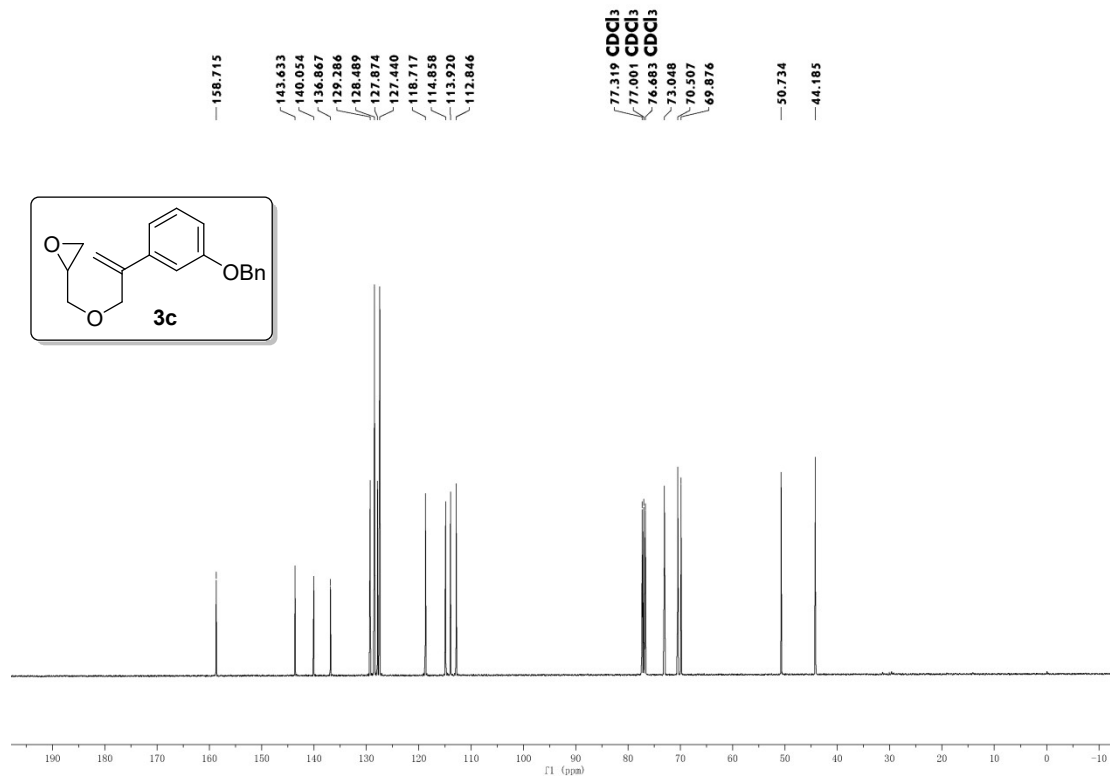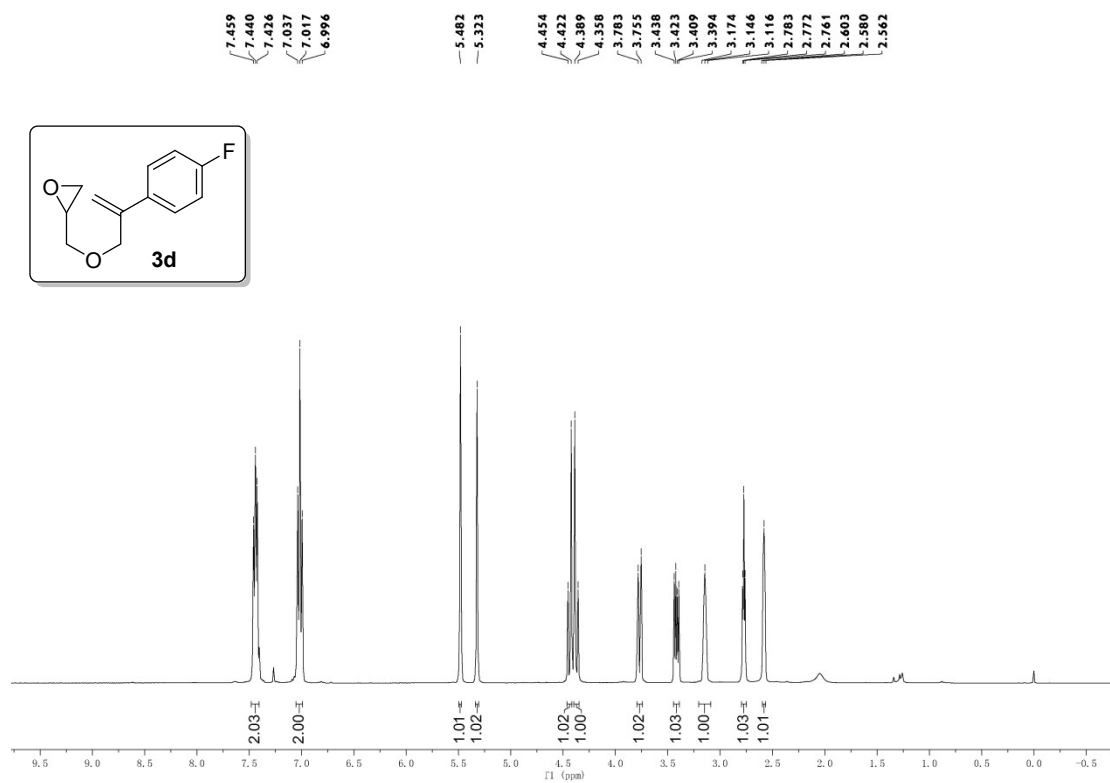



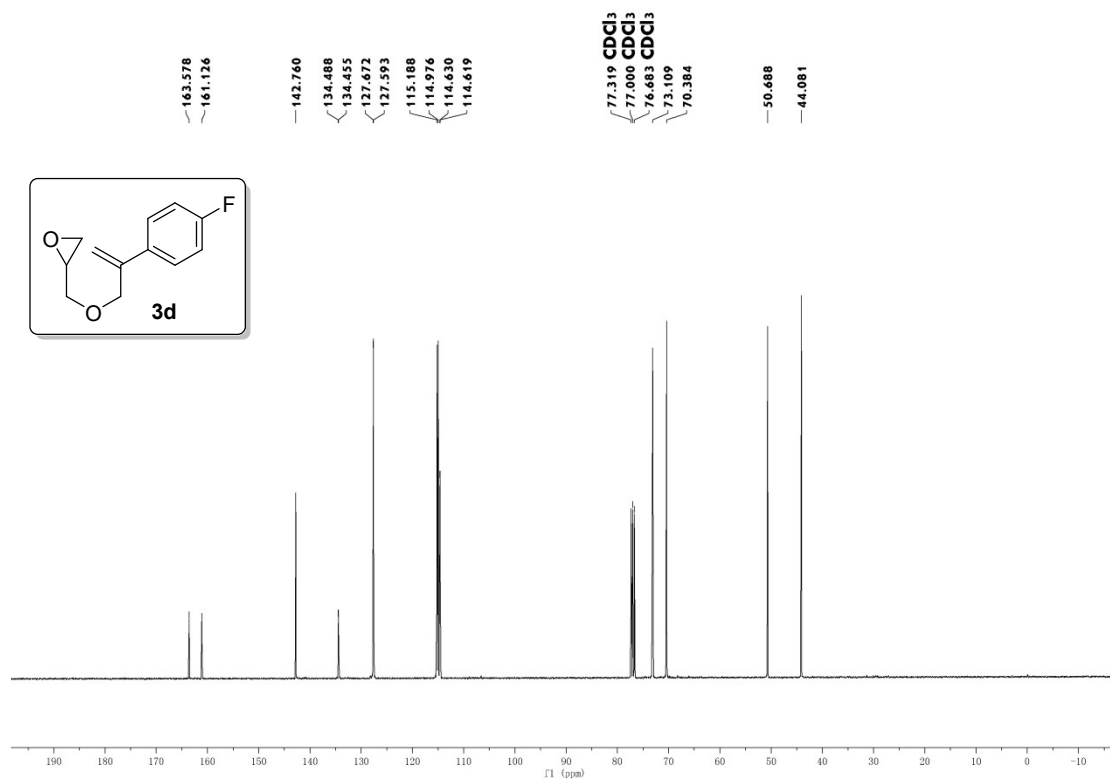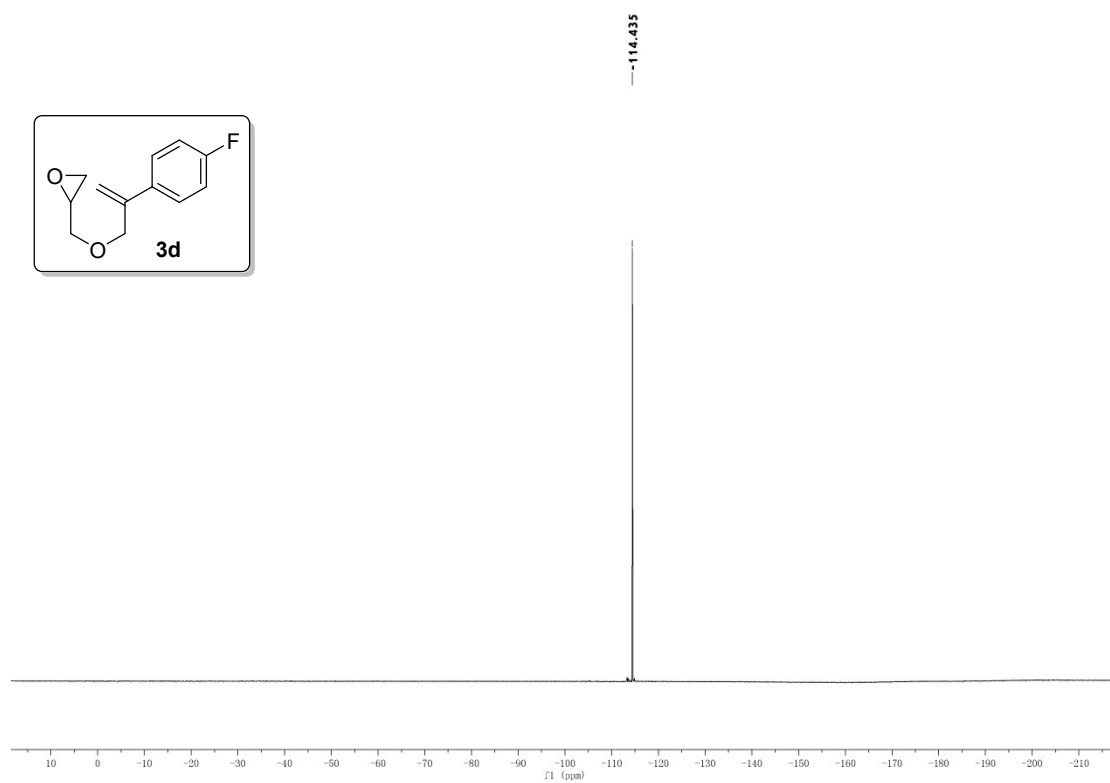

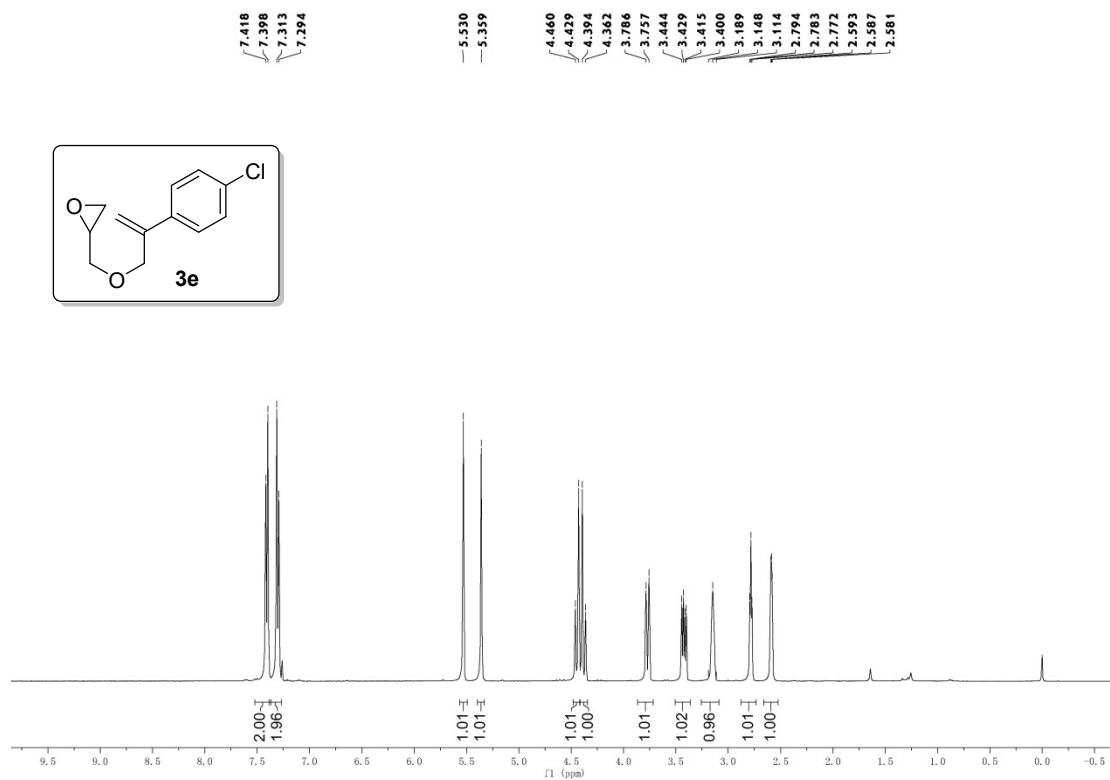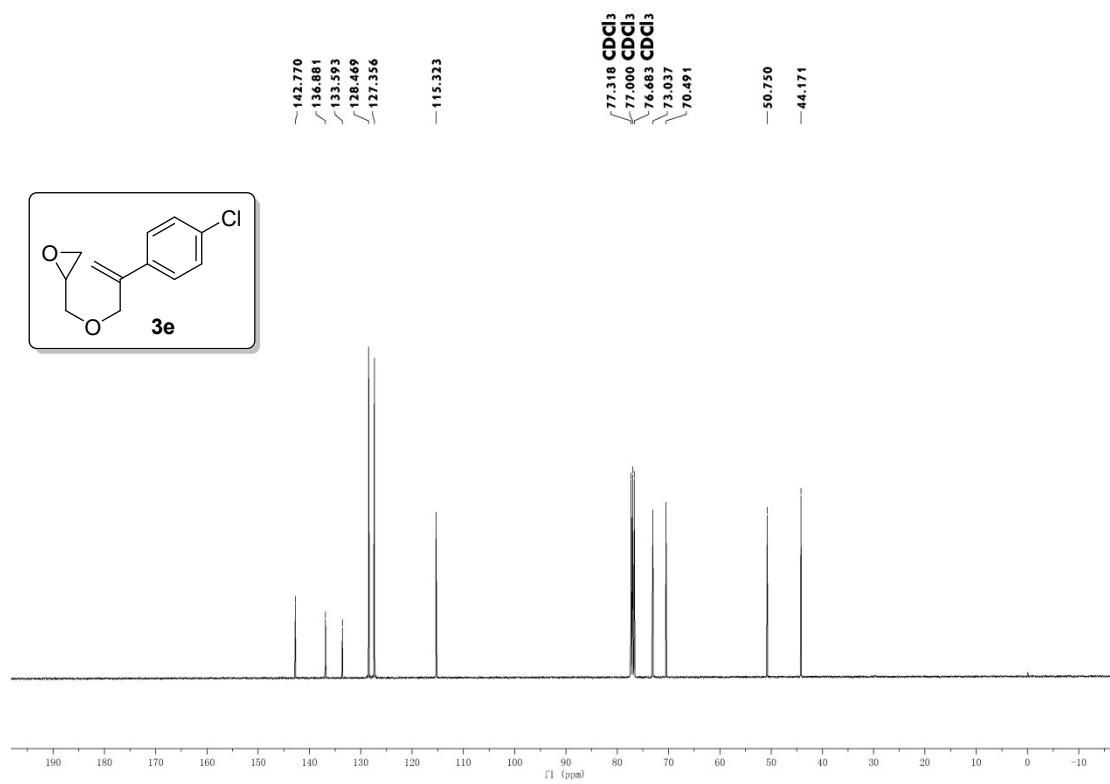

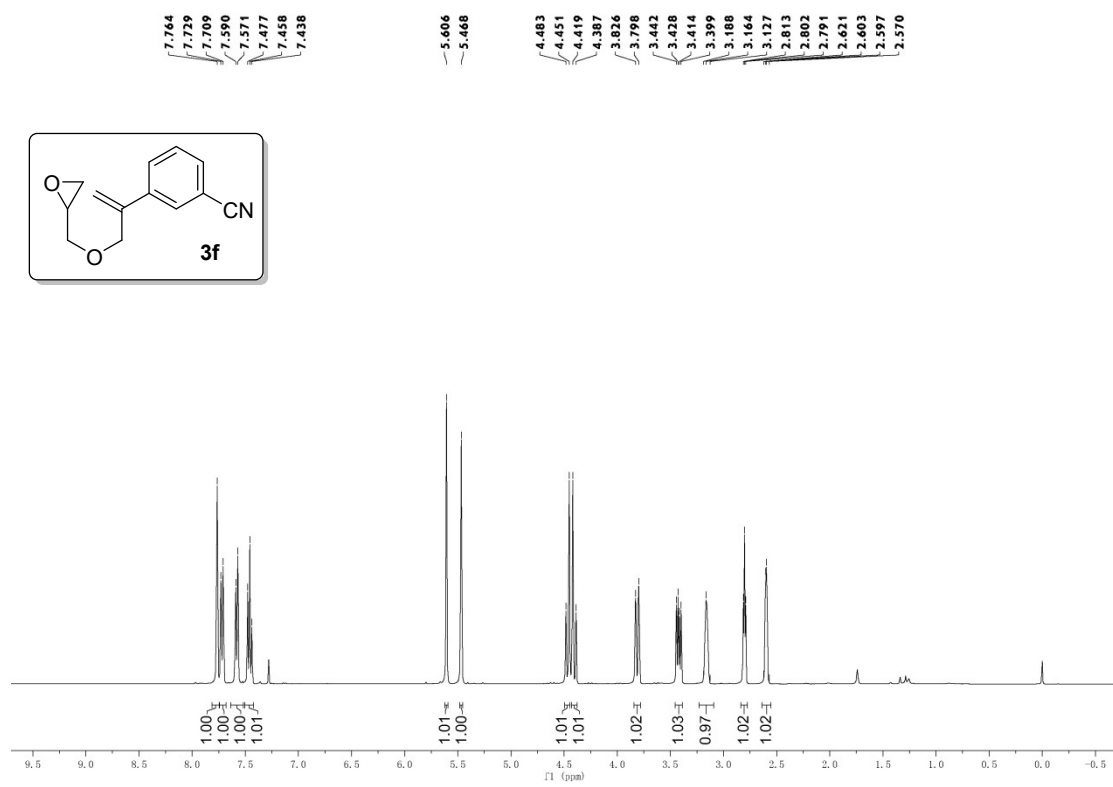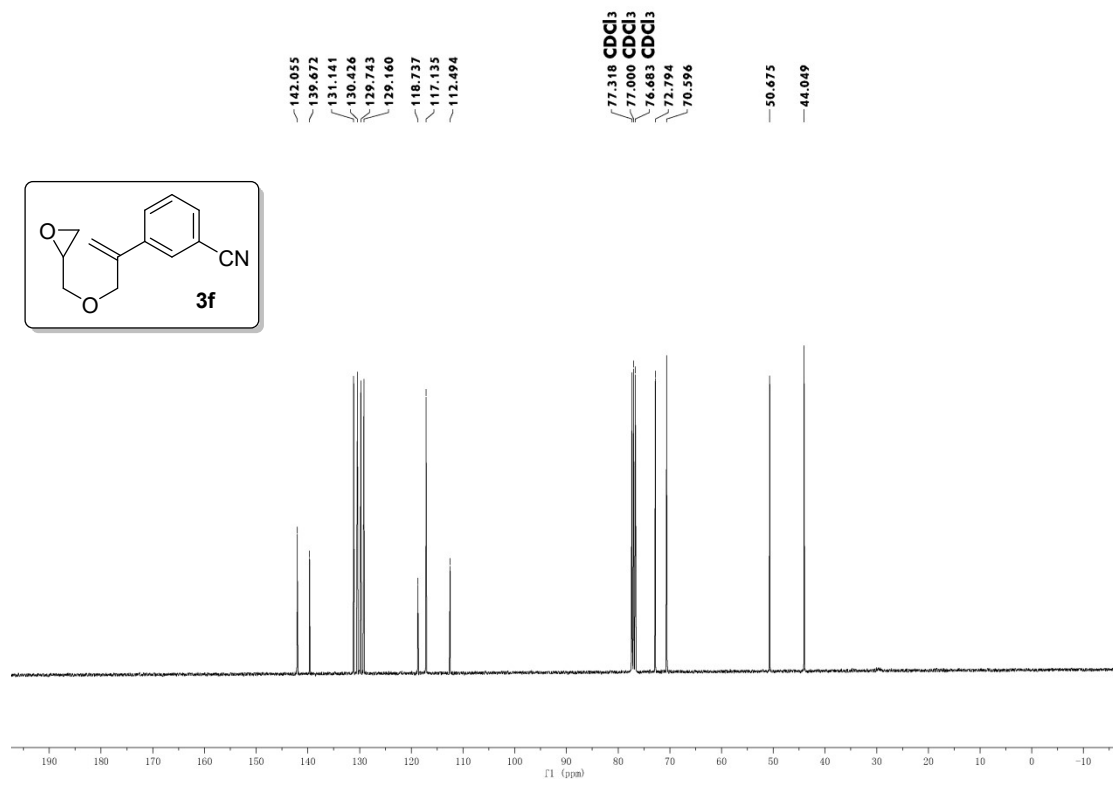

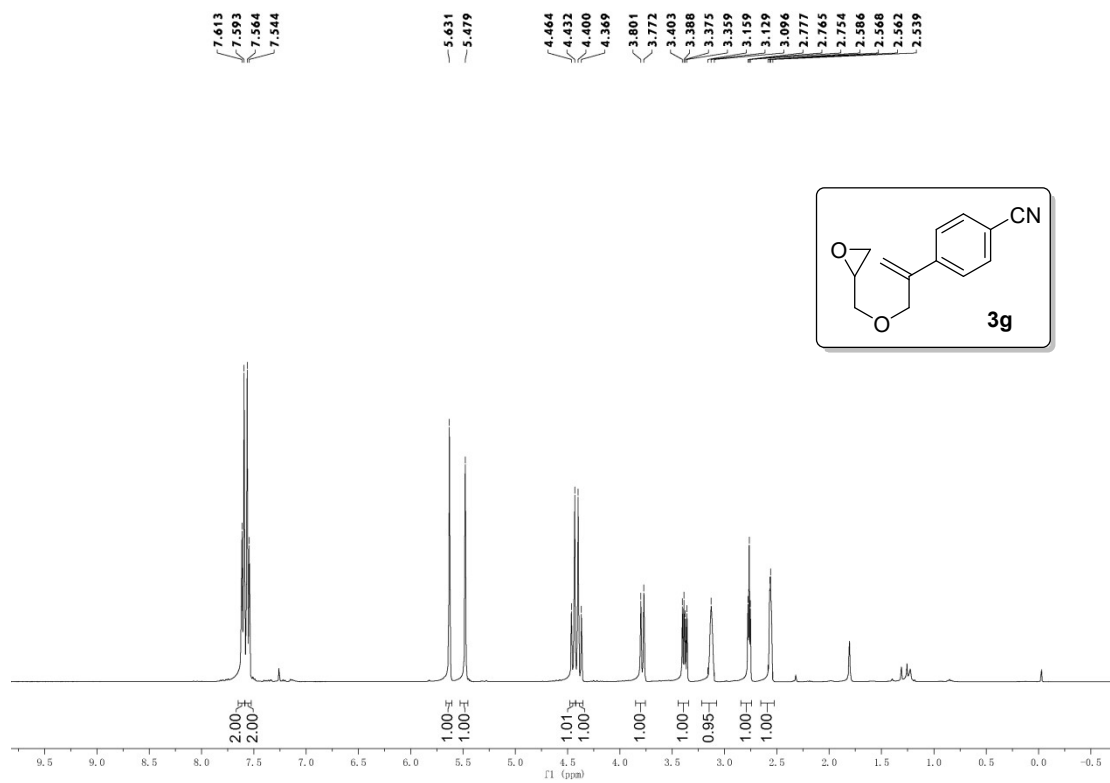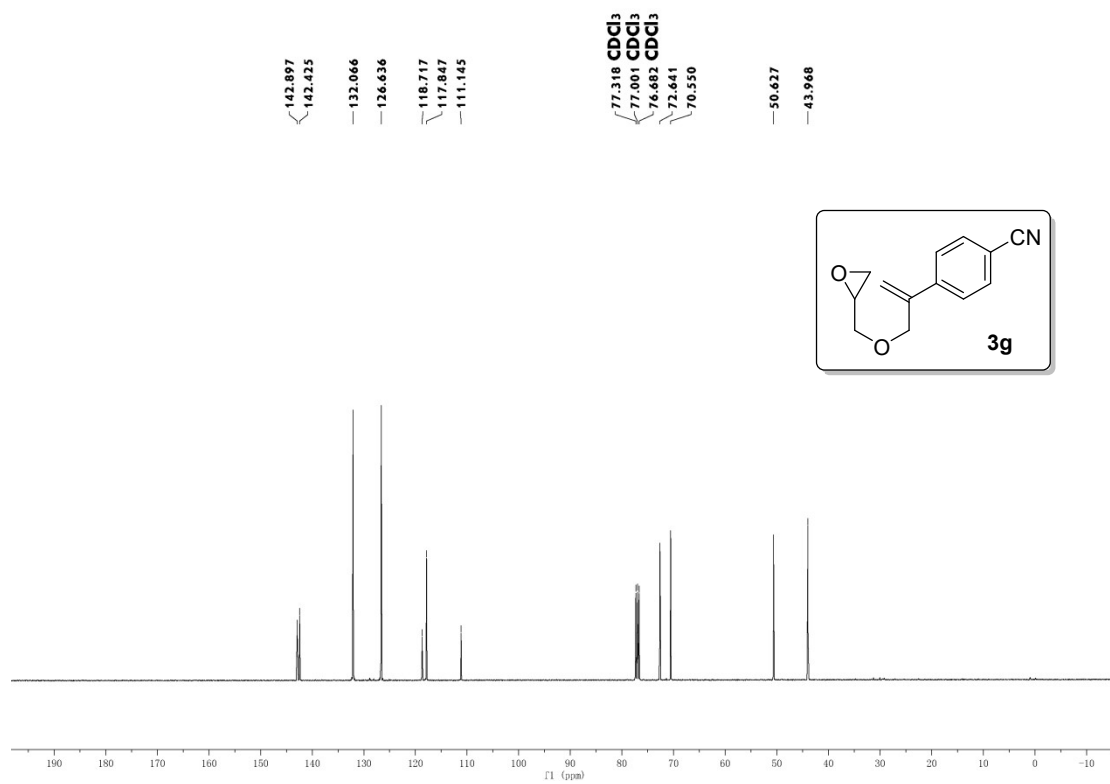

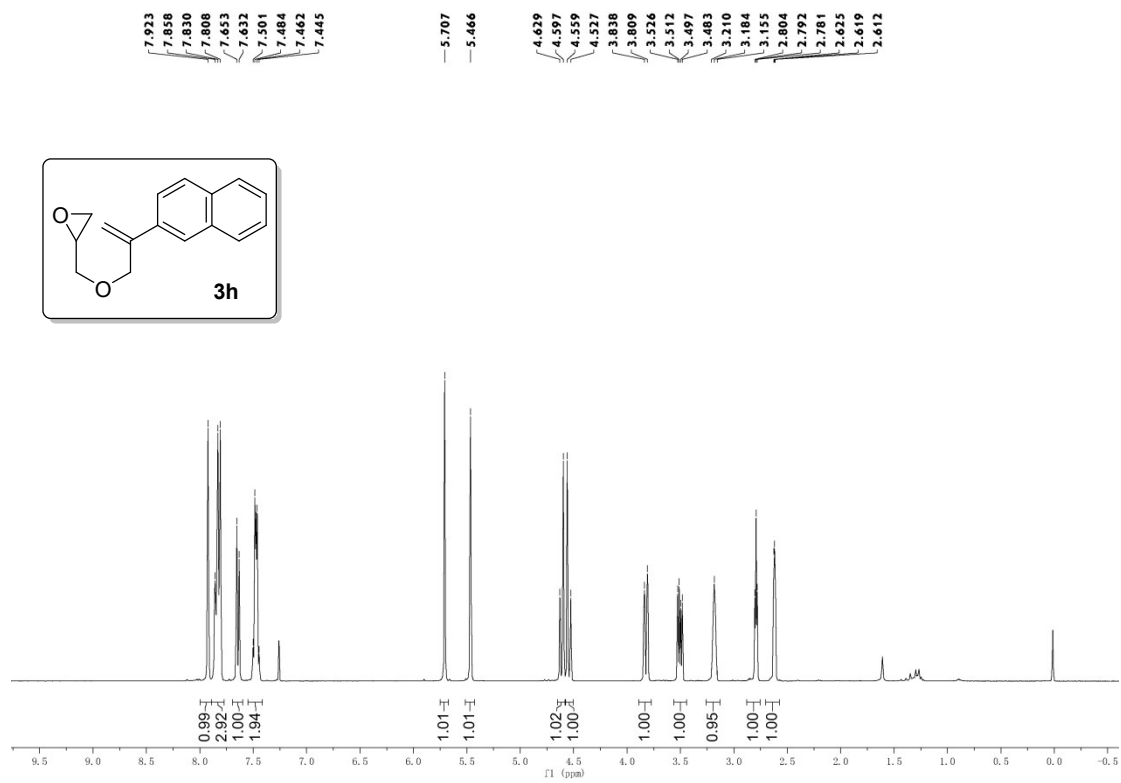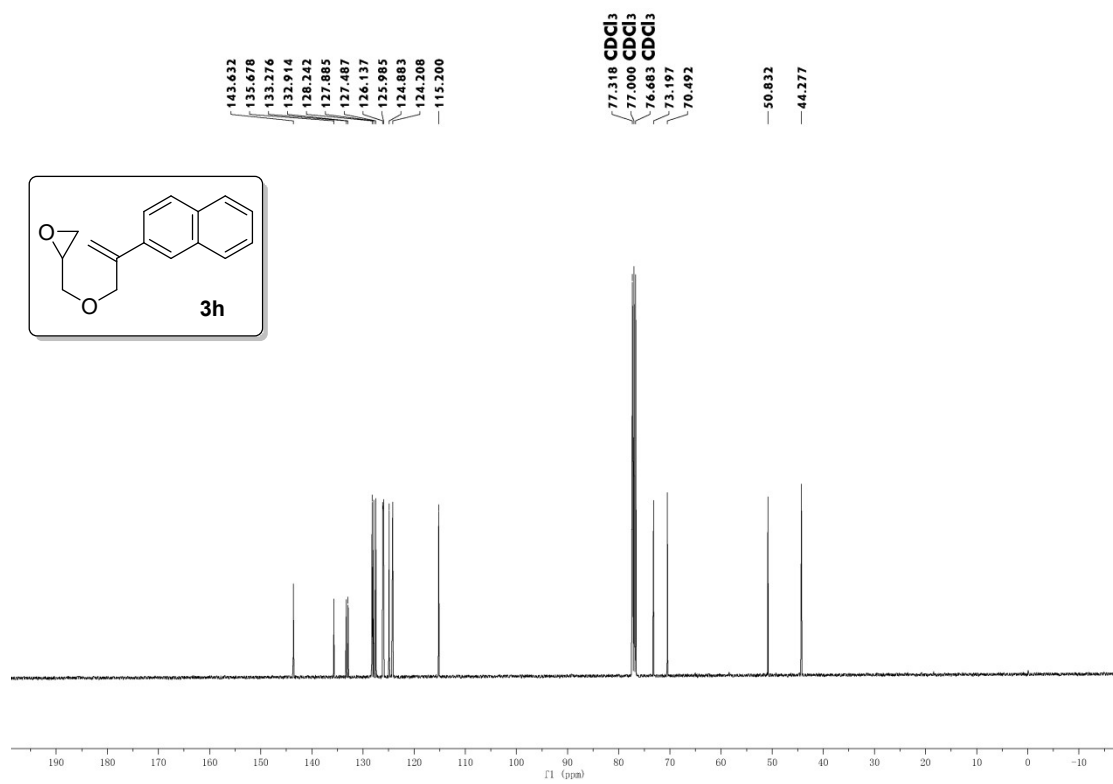

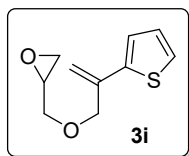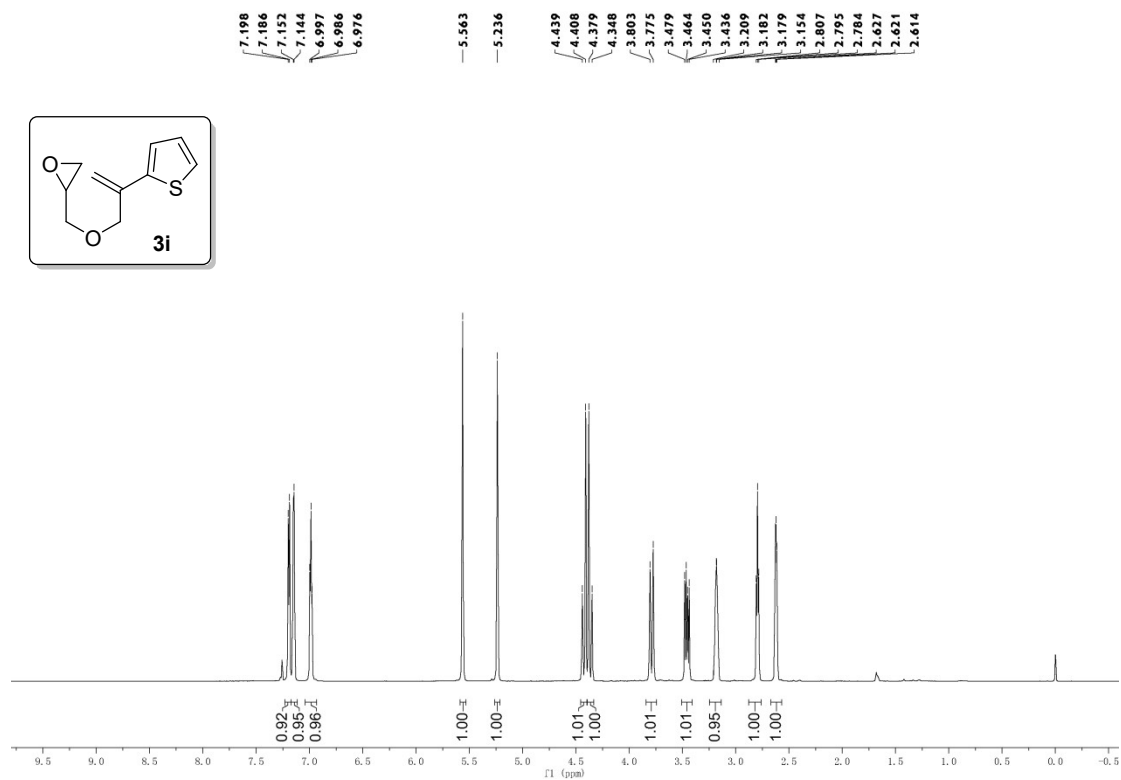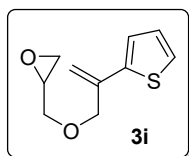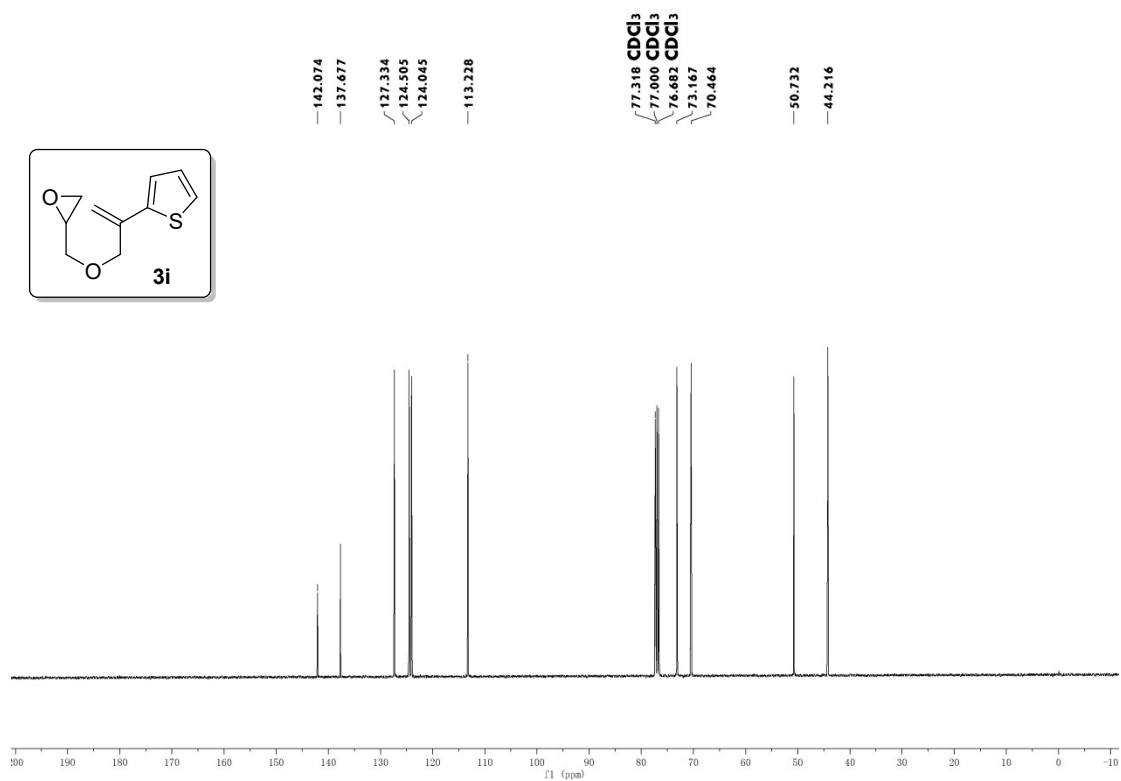

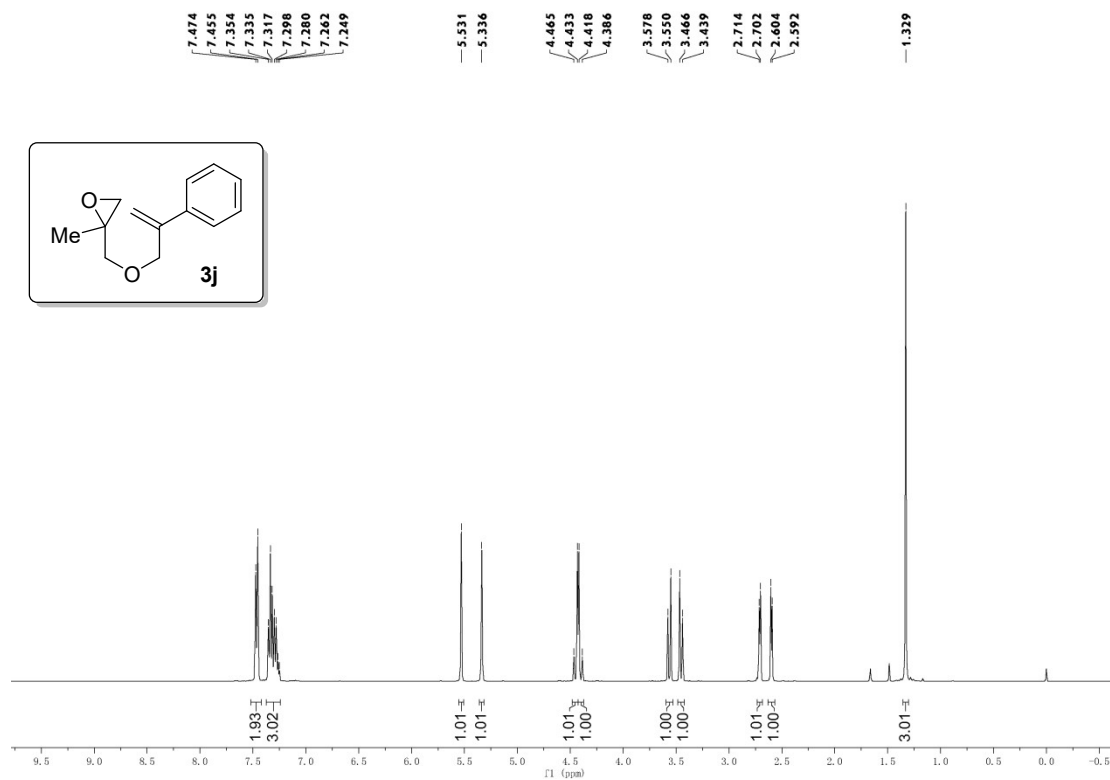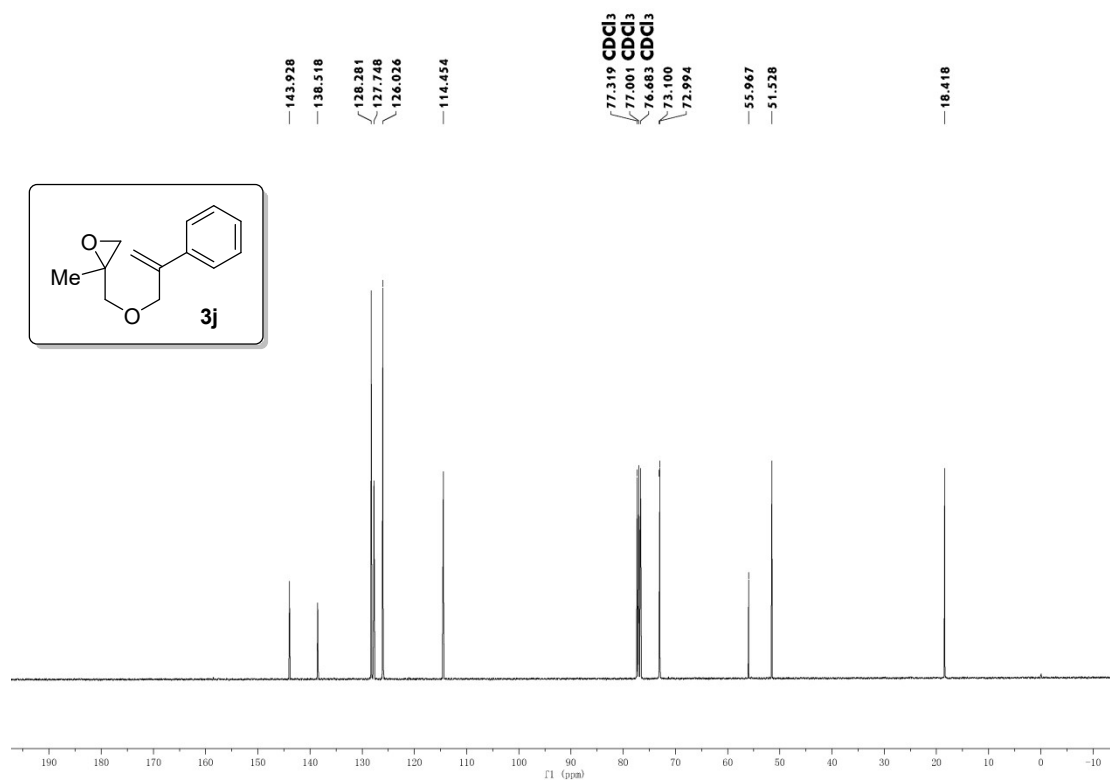

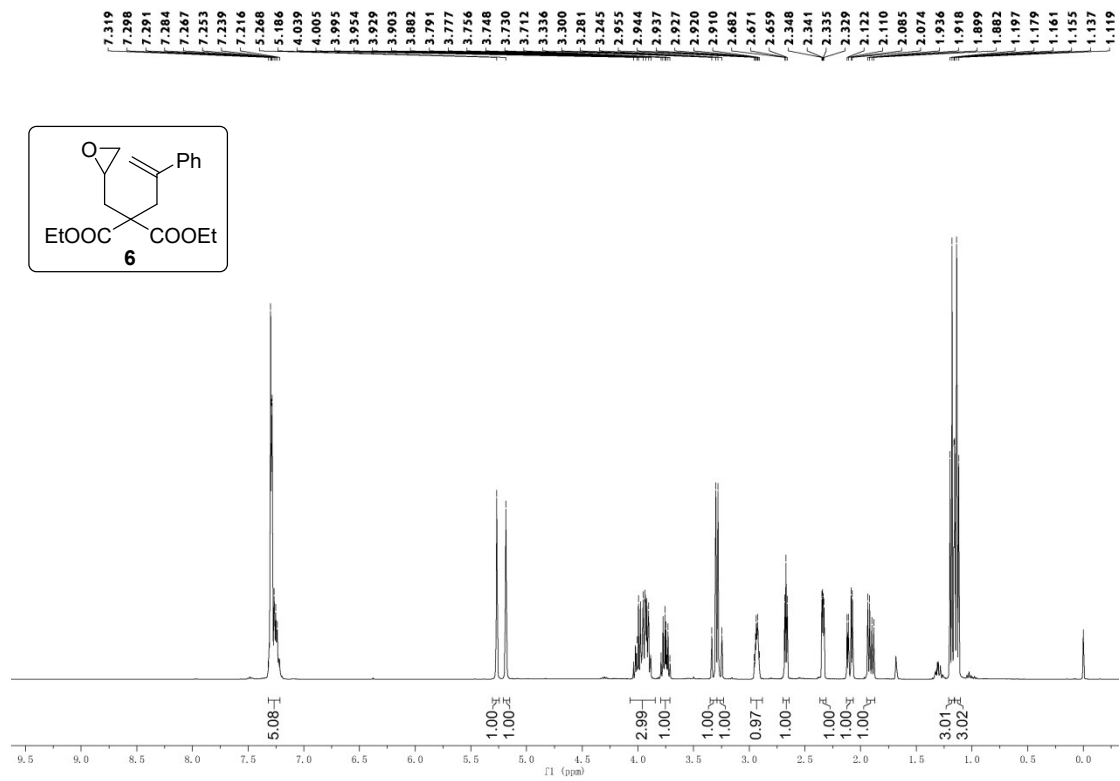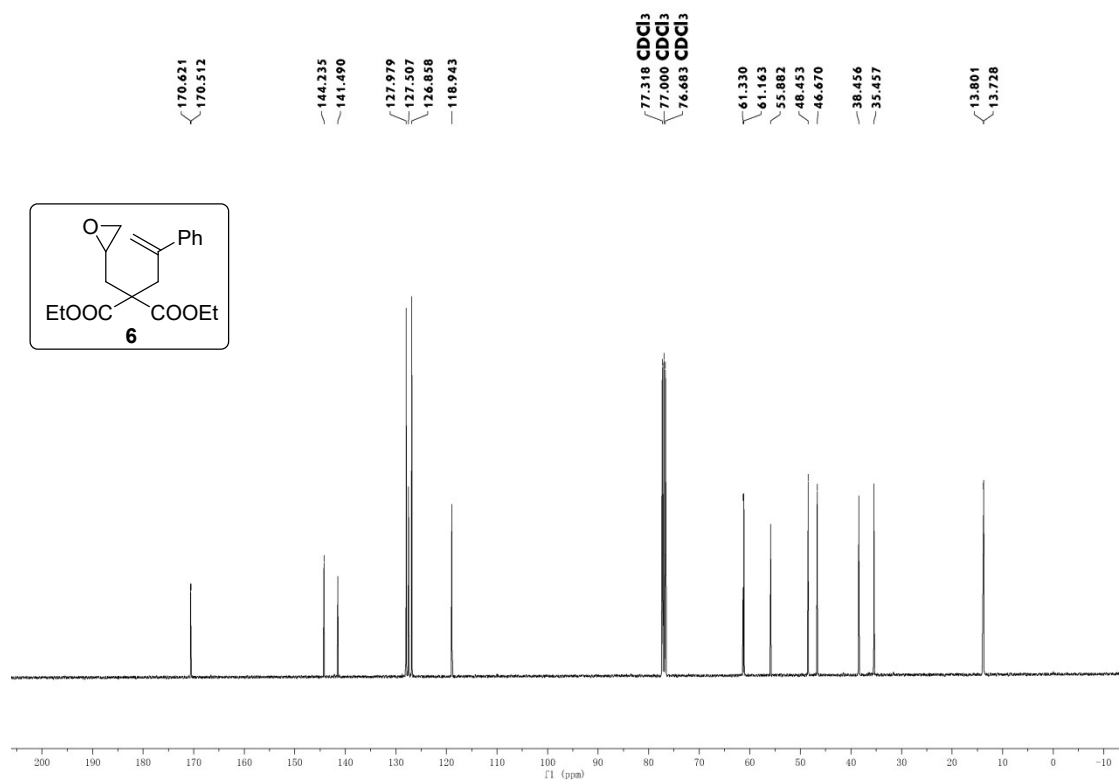



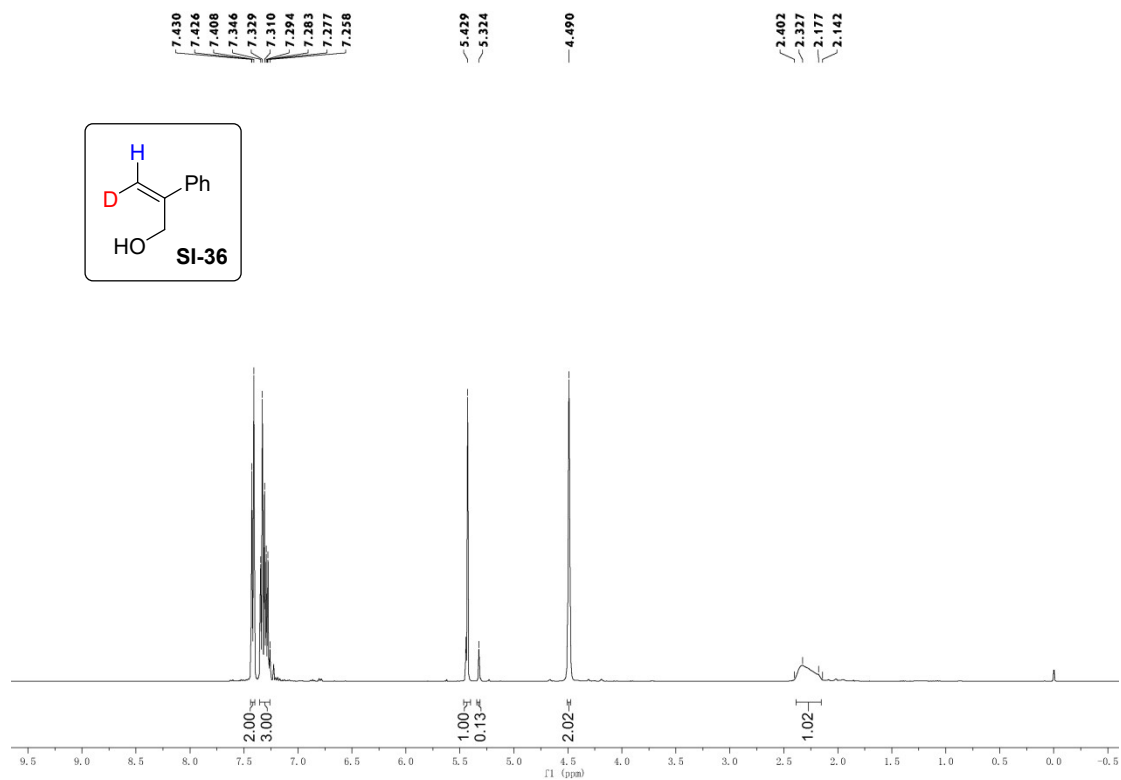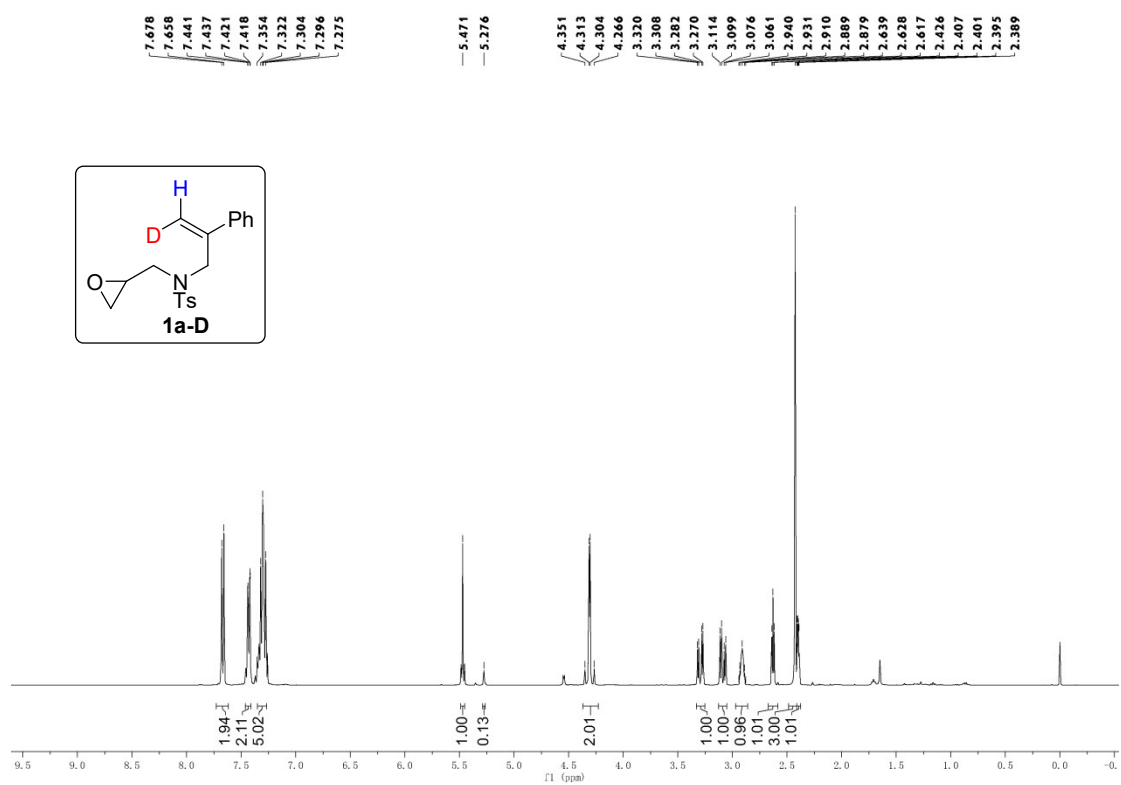

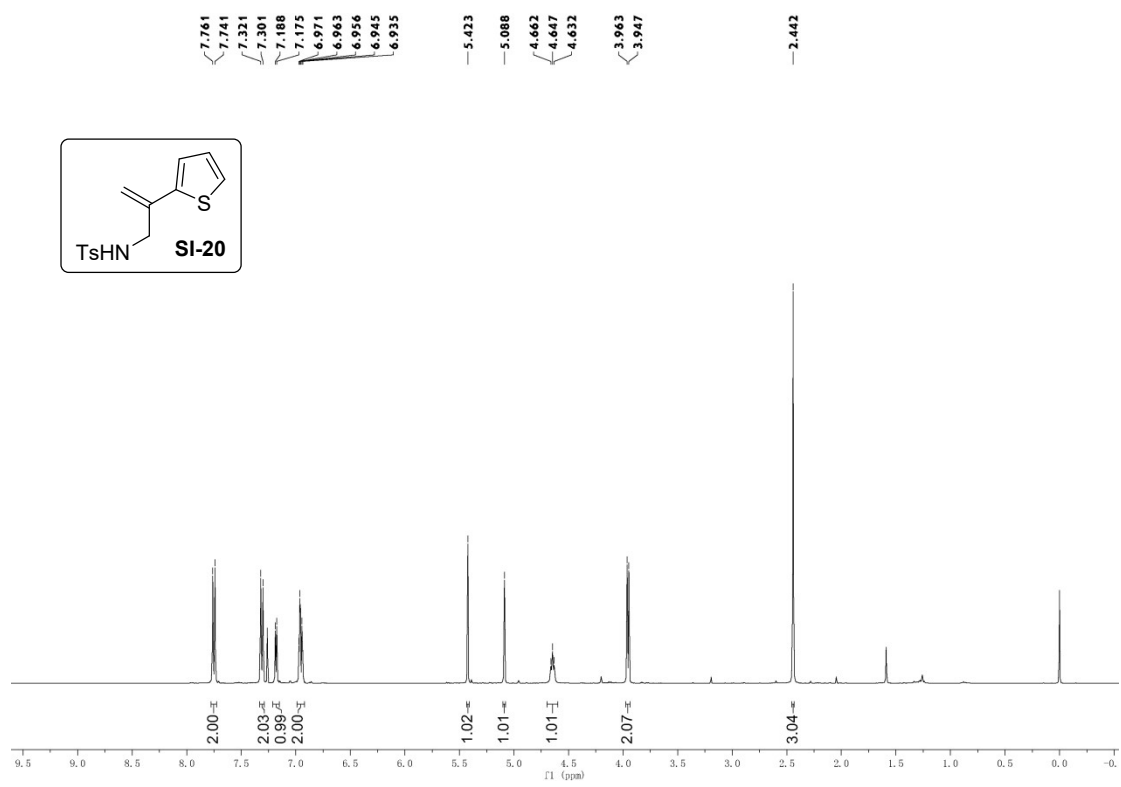

Supplement: d1qo00942g1.pdf [file d1qo00942g1.pdf]
